# Supplementary material for: A Hierarchical Transcriptional Regulatory Network Required for Long-Term Thermal Stress Tolerance in an Industrial Saccharomyces cerevisiae Strain
Source: Front Bioeng Biotechnol. 2022 Jan 18;9:826238. doi: 10.3389/fbioe.2021.826238 (PMC8804346; doi:10.3389/fbioe.2021.826238)
Supplement: Supplementary file 7 [file Table5.XLSX]

## Sheet: Downstream TF-associated SDEGs
40°C									30°C
Sin3			Srb2			Mig1			Sin3			Srb2			Mig1
Transcrition Factors	Documented Regulated Genes	Log2FoldChange	Transcrition Factors	Documented Regulated Genes	Log2FoldChange	Transcrition Factors	Documented Regulated Genes	Log2FoldChange	Transcrition Factors	Documented Regulated Genes	Log2FoldChange	Transcrition Factors	Documented Regulated Genes	Log2FoldChange	Transcrition Factors	Documented Regulated Genes	Log2FoldChange
Hac1	RGI2	4.26624	Hac1	GAP1	3.6212	Hac1	PHO89	3.17004	Gat4	SAE3	10.9039	Znf1	BSC1	6.62373	Mth1	YPK2	2.26019
Hac1	HXK1	4.0661	Hac1	SIT1	3.2006	Hac1	FET3	2.99952	Gat4	YDL241W	5.85532	Znf1	GPX2	2.57137	Mth1	SPO20	1.99268
Hac1	PHO89	3.7189	Hac1	FET3	2.82941	Hac1	SIT1	2.82048	Gat4	SRT1	5.34086	Znf1	NDE1	2.21355	Mth1	SUC2	1.13112
Hac1	HXT2	3.69306	Hac1	CWP1	2.72084	Hac1	HXK1	2.48102	Gat4	DIP5	5.17281	Znf1	ADE1	1.9611	Mth1	YDR222W	-1.05976
Hac1	IME2	3.47788	Hac1	MET6	2.27819	Hac1	HXT2	2.4797	Gat4	ARO9	5.05701	Znf1	AQR1	1.63785	Upc2	YHR210C	2.66333
Hac1	CAR1	2.83052	Hac1	OPT1	2.06882	Hac1	CWP1	2.42295	Gat4	AQY2	4.57041	Znf1	BAT2	1.55026	Upc2	MAL12	2.20705
Hac1	GPH1	2.73723	Hac1	FRE1	1.98765	Hac1	RGI2	2.07215	Gat4	FIT2	4.54155	Znf1	CDC21	1.32923	Upc2	UPC2	1.62419
Hac1	MET6	2.59598	Hac1	SUR7	1.92545	Hac1	FAR1	1.99493	Gat4	SHC1	3.59074	Znf1	VHR2	1.29516	Upc2	HXT3	1.42867
Hac1	CWP1	2.58596	Hac1	GIC2	1.86717	Hac1	CAR1	1.94209	Gat4	NDJ1	3.47742	Znf1	NET1	1.16474	Upc2	UBP11	1.32613
Hac1	ACH1	2.56891	Hac1	CAR1	1.80795	Hac1	ADR1	1.7611	Gat4	ARO10	3.37379	Znf1	MLO50	1.14655	Upc2	CYC7	1.19898
Hac1	VID24	2.41117	Hac1	GDH1	1.71052	Hac1	VID24	1.76024	Gat4	RNP1	3.07073	Znf1	GCV1	1.03327	Upc2	SUC2	1.13112
Hac1	FLO11	2.24748	Hac1	NCE102	1.67273	Hac1	HXT3	1.75663	Gat4	YOL014W	3.0502	Znf1	RTS3	-1.06589	Upc2	SUE1	1.11527
Hac1	SPO13	2.2421	Hac1	ALK1	1.59934	Hac1	FRE1	1.70638	Gat4	GUP2	3.0121	Znf1	TPO2	-1.07825	Upc2	MOH1	-1.10585
Hac1	HOP1	2.24135	Hac1	MUP3	1.48603	Hac1	IME2	1.67338	Gat4	SCW11	2.87184	Znf1	YIL001W	-1.25608	Upc2	YNL234W	-1.13895
Hac1	SPS22	2.21699	Hac1	YOL019W	1.45881	Hac1	HXT4	1.62838	Gat4	MAE1	2.85642	Znf1	CIP1	-1.44166	Upc2	PIR3	-1.14366
Hac1	SPO16	2.10998	Hac1	MAE1	1.39908	Hac1	OPT1	1.58951	Gat4	FMP23	2.77751	Znf1	YOX1	-1.45101	Upc2	SPS100	-1.27539
Hac1	ALD6	2.07586	Hac1	Ho	1.37153	Hac1	INA1	1.56478	Gat4	FRE4	2.69556	Znf1	ERJ5	-1.46199	Upc2	YHL042W	-1.32815
Hac1	SIT1	2.07189	Hac1	CYC1	1.32106	Hac1	RTS3	1.40125	Gat4	PUT1	2.68427	Znf1	MET14	-1.46482	Upc2	HSP26	-1.37207
Hac1	MET17	2.00654	Hac1	FCY2	1.31422	Hac1	ALD6	1.37767	Gat4	FRE1	2.67894	Znf1	OYE2	-1.53434	Upc2	GPG1	-1.40355
Hac1	PHO5	1.96325	Hac1	EXG1	1.31131	Hac1	NRG2	1.32975	Gat4	PHO5	2.37198	Znf1	ARG4	-1.94088	Upc2	ICS2	-1.43229
Hac1	LSC2	1.89616	Hac1	HXT2	1.28836	Hac1	JEN1	1.32918	Gat4	BOP2	2.28352	Znf1	ICT1	-2.05137	Upc2	YER188W	-1.54798
Hac1	SGA1	1.88433	Hac1	CSI2	1.27358	Hac1	EXG1	1.24032	Gat4	PCL5	2.25408	Znf1	YMR181C	-2.19526	Upc2	PRM5	-1.65625
Hac1	YCR050C	1.85619	Hac1	PHO90	1.18076	Hac1	YBL101W-A	1.23105	Gat4	ILV2	2.2183	Znf1	YGP1	-2.9167	Mal33	YDL241W	1.89674
Hac1	PHM7	1.84002	Hac1	CLB2	1.15929	Hac1	FCY2	1.21595	Gat4	PEX9	2.15986	Znf1	YRO2	-3.58986	Mal33	MAL33	1.61333
Hac1	FAT3	1.82453	Hac1	MET17	1.15129	Hac1	ACO1	1.1585	Gat4	YML131W	2.08908	Znf1	GPX1	-4.15421	Mal33	UBP11	1.32613
Hac1	HXT4	1.82192	Hac1	FUR1	1.08967	Hac1	EGT2	1.15215	Gat4	CAT2	2.03633	Znf1	ATG34	-4.36606	Mal33	CTR3	1.20476
Hac1	ACS1	1.80831	Hac1	EGT2	1.08817	Hac1	SUR7	1.1025	Gat4	UGA3	1.99506	Znf1	HSP12	-8.03477	Mal33	HXT1	1.06571
Hac1	NDJ1	1.79939	Hac1	CTR86	1.01122	Hac1	MAE1	1.07855	Gat4	PHO11	1.90507	Sut2	BSC1	6.62373	Mal33	ARO9	1.03529
Hac1	JEN1	1.78117	Hac1	COS1	-1.00099	Hac1	CLB2	1.06264	Gat4	ESBP6	1.90193	Sut2	FRE4	4.1803	Mal33	ALT1	1.02375
Hac1	FET3	1.75393	Hac1	LHS1	-1.0219	Hac1	ATO3	1.04999	Gat4	THR4	1.89521	Sut2	SUT2	3.28451	Gal4	CUP1-1	7.8589
Hac1	GAP1	1.74254	Hac1	FCY21	-1.02868	Hac1	RPS14b	1.02793	Gat4	ADH6	1.89188	Sut2	ARO9	3.13265	Gal4	CUP1-2	7.8589
Hac1	AGX1	1.73115	Hac1	YGP1	-1.02954	Hac1	TPM1	-1.02887	Gat4	CIA2	1.68579	Sut2	RRP7	2.17946	Gal4	YHR210C	2.66333
Hac1	UGX2	1.72892	Hac1	HUL5	-1.03193	Hac1	ERP2	-1.05905	Gat4	FDH1	1.68243	Sut2	YOR342C	2.03913	Gal4	MAL31	2.64482
Hac1	REC8	1.63095	Hac1	YJR107W	-1.04914	Hac1	MPA43	-1.06072	Gat4	ECM13	1.66194	Sut2	YOR338W	1.87768	Gal4	MAL12	2.20705
Hac1	SPS19	1.52977	Hac1	UFD1	-1.05009	Hac1	KTR1	-1.08045	Gat4	MST28	1.64162	Sut2	CAR2	1.84946	Gal4	GUT1	1.73892
Hac1	USV1	1.47994	Hac1	YPL247C	-1.0667	Hac1	YBR137W	-1.09253	Gat4	SPH1	1.59111	Sut2	ECM1	1.84161	Gal4	HXT3	1.42867
Hac1	PAU23	1.47118	Hac1	YMR315W	-1.10538	Hac1	YRO2	-1.14542	Gat4	MDG1	1.50671	Sut2	GAS3	1.71738	Gal4	GAL4	1.30159
Hac1	MUP3	1.40641	Hac1	YRO2	-1.10981	Hac1	EUG1	-1.15704	Gat4	HXT2	1.49806	Sut2	AQR1	1.63785	Gal4	YHB1	1.17044
Hac1	YMR144W	1.39224	Hac1	PLB1	-1.13724	Hac1	PMI40	-1.18044	Gat4	MEF2	1.49789	Sut2	BAT2	1.55026	Gal4	SUC2	1.13112
Hac1	FRE1	1.37016	Hac1	EHT1	-1.14127	Hac1	PMT3	-1.18132	Gat4	AQR1	1.45422	Sut2	ERG11	1.45214	Gal4	HXT1	1.06571
Hac1	APJ1	1.32445	Hac1	FUN14	-1.16992	Hac1	YDR210W	-1.18581	Gat4	PDR10	1.45402	Sut2	RHO3	1.33343	Gal4	ALT1	1.02375
Hac1	PTR3	1.30871	Hac1	YPS6	-1.2052	Hac1	ERV29	-1.18627	Gat4	YHB1	1.41908	Sut2	CDC21	1.32923	Gal4	TDH1	-1.00043
Hac1	YLR460C	1.29974	Hac1	KTR1	-1.21791	Hac1	PCL1	-1.19431	Gat4	PHO90	1.39344	Sut2	VHR2	1.29516	Gal4	TIP1	-1.0554
Hac1	ZPS1	1.27717	Hac1	MSP1	-1.23372	Hac1	SEM1	-1.22704	Gat4	TIS11	1.37373	Sut2	STB1	1.17802	Gal4	PIR3	-1.14366
Hac1	GAL2	1.15816	Hac1	YIL108W	-1.25396	Hac1	MCD4	-1.24747	Gat4	YHP1	1.37286	Sut2	NET1	1.16474	Gal4	PRM5	-1.65625
Hac1	ATO3	1.11143	Hac1	ERO1	-1.25527	Hac1	LCL2	-1.24925	Gat4	YKL033W-A	1.36221	Sut2	MLO50	1.14655	Gal4	SDP1	-1.93321
Hac1	YLR049C	1.1035	Hac1	FMO1	-1.25835	Hac1	ERO1	-1.2743	Gat4	ISU2	1.32898	Sut2	UPC2	1.10436	Gal4	PMA2	-2.6067
Hac1	ADR1	1.08408	Hac1	FPR2	-1.25873	Hac1	OST2	-1.28758	Gat4	IMA1	1.24771	Sut2	GCV2	1.07846	Gal4	MIG1	-10.7689
Hac1	TSA2	1.07825	Hac1	YPC1	-1.26255	Hac1	ULI1	-1.3633	Gat4	IZH4	1.22335	Sut2	GCV1	1.03327	Mig2	CUP1-1	7.8589
Hac1	SPG5	1.05805	Hac1	RMR1	-1.26889	Hac1	PDI1	-1.38096	Gat4	ODC1	1.19689	Sut2	CBP3	-1.00342	Mig2	HXK1	4.7682
Hac1	GCY1	1.03737	Hac1	JEN1	-1.29078	Hac1	ADD37	-1.43943	Gat4	YDL180W	1.18873	Sut2	NNF1	-1.03102	Mig2	GSY1	2.81325
Hac1	PBP2	1.00943	Hac1	EUG1	-1.30378	Hac1	MPD1	-1.46542	Gat4	ACH1	1.17007	Sut2	FHN1	-1.03256	Mig2	YHR210C	2.66333
Hac1	PMT1	-1	Hac1	YGL117W	-1.31202	Hac1	CWP2	-1.4847	Gat4	YPL277C	1.16666	Sut2	DMA2	-1.03756	Mig2	MAL31	2.64482
Hac1	PMT2	-1	Hac1	ADD37	-1.34984	Hac1	EHT1	-1.48903	Gat4	YGR035C	1.0981	Sut2	MGA1	-1.07808	Mig2	MTH1	2.56512
Hac1	ERO1	-1	Hac1	TOS3	-1.35007	Hac1	URH1	-1.50935	Gat4	POR2	1.08359	Sut2	DOT5	-1.10938	Mig2	LEE1	2.27332
Hac1	TPM1	-1	Hac1	URH1	-1.35353	Hac1	YIP3	-1.51478	Gat4	RPS30B	1.00179	Sut2	YDR209C	-1.17886	Mig2	YPK2	2.26019
Hac1	LHS1	-1	Hac1	COQ6	-1.38408	Hac1	HAC1	-1.52212	Gat4	ICT1	-1.00485	Sut2	OCH1	-1.19741	Mig2	YNL144C	2.14337
Hac1	RPS11a	-1	Hac1	REC104	-1.38939	Hac1	TSA1	-1.54298	Gat4	RSM10	-1.01231	Sut2	PUT2	-1.21374	Mig2	YDL241W	1.89674
Hac1	UMP1	-1	Hac1	OYE2	-1.39299	Hac1	YGP1	-1.55263	Gat4	SDH2	-1.01459	Sut2	KIN1	-1.23274	Mig2	GUT1	1.73892
Hac1	DPM1	-1	Hac1	SIL1	-1.39813	Hac1	SIL1	-1.61623	Gat4	KGD1	-1.01857	Sut2	FRT1	-1.26068	Mig2	HXT4	1.71743
Hac1	HEM15	-1	Hac1	DER1	-1.40521	Hac1	THI20	-1.69995	Gat4	ATP2	-1.02379	Sut2	MDH1	-1.30839	Mig2	MAL33	1.61333
Hac1	KTR1	-1	Hac1	TSA1	-1.41167	Hac1	YDL124W	-1.77735	Gat4	MAM33	-1.0313	Sut2	YIR016W	-1.42004	Mig2	YMR103C	1.47415
Hac1	SPT15	-1	Hac1	YPS1	-1.4422	Hac1	HSP82	-1.90978	Gat4	ATP5	-1.04146	Sut2	UGP1	-1.42378	Mig2	HXT3	1.42867
Hac1	MDE1	-1.1	Hac1	THI13	-1.45296	Hac1	TDH1	-2.01056	Gat4	HOS2	-1.06456	Sut2	YOX1	-1.45101	Mig2	IGD1	1.39946
Hac1	ADH1	-1.1	Hac1	SEM1	-1.48566	Hac1	DOG1	-2.01497	Gat4	MRF1	-1.06922	Sut2	ERJ5	-1.46199	Mig2	YIL024C	1.38102
Hac1	SCJ1	-1.1	Hac1	YBR137W	-1.48579	Hac1	YET2	-2.16314	Gat4	SCW4	-1.07902	Sut2	MRP8	-1.51353	Mig2	TDA10	1.35533
Hac1	SEC72	-1.1	Hac1	FRT2	-1.51886	Hac1	OPI3	-2.25652	Gat4	NDI1	-1.10045	Sut2	RSM19	-1.52303	Mig2	UBP11	1.32613
Hac1	PDC1	-1.1	Hac1	HXT15	-1.53151	Hac1	KAR2	-3.0319	Gat4	COR1	-1.10529	Sut2	DCS1	-1.59584	Mig2	GAL4	1.30159
Hac1	RPL21b	-1.1	Hac1	UGX2	-1.53685	Hac1	INO1	-3.31536	Gat4	YGR201C	-1.11779	Sut2	ARA1	-1.73237	Mig2	IMA1	1.23741
Hac1	RPL9b	-1.1	Hac1	ACB1	-1.55137	Mig1	MPC3	3.40387	Gat4	CMC1	-1.14056	Sut2	YBR056W	-1.83339	Mig2	SNF3	1.1962
Hac1	RPS19a	-1.1	Hac1	IRC4	-1.55187	Mig1	PHO89	3.17004	Gat4	MSB2	-1.14586	Sut2	LSP1	-1.97885	Mig2	AQY3	1.15504
Hac1	RPS20	-1.1	Hac1	UBC8	-1.57384	Mig1	PIR3	3.10377	Gat4	DIT2	-1.15598	Sut2	ETR1	-2.01736	Mig2	SUC2	1.13112
Hac1	MIX23	-1.1	Hac1	TDH2	-1.58494	Mig1	SIT1	2.82048	Gat4	ISF1	-1.1599	Sut2	ALD4	-2.0509	Mig2	HXT1	1.06571
Hac1	PCL1	-1.2	Hac1	YIP3	-1.61466	Mig1	IZH4	2.53436	Gat4	THI7	-1.1658	Sut2	ICT1	-2.05137	Mig2	EMI2	1.04721
Hac1	PHO3	-1.2	Hac1	TSA2	-1.62251	Mig1	HXK1	2.48102	Gat4	GRX4	-1.18708	Sut2	VHS3	-2.05302	Mig2	YDR222W	-1.05976
Hac1	FPR2	-1.2	Hac1	GAL2	-1.63173	Mig1	HXT2	2.4797	Gat4	MRPL8	-1.31921	Sut2	CIT1	-2.08424	Mig2	FMP45	-1.35251
Hac1	ERP1	-1.2	Hac1	YGL230C	-1.63485	Mig1	MTH1	2.37933	Gat4	PCL7	-1.33513	Sut2	SED1	-2.12371	Mig2	FMP48	-1.3924
Hac1	RET3	-1.2	Hac1	UBC11	-1.65341	Mig1	FIT3	2.24073	Gat4	MRPL15	-1.35271	Sut2	YMR181C	-2.19526	Mig2	ICS2	-1.43229
Hac1	SBH1	-1.2	Hac1	YDL124W	-1.65441	Mig1	ZNF1	2.18733	Gat4	STE6	-1.36033	Sut2	MSN4	-3.02979	Mig2	MIG1	-10.7689
Hac1	RPL16a	-1.2	Hac1	GAL1	-1.66237	Mig1	NDE1	2.14285	Gat4	HIM1	-1.37071	Sut2	NDE2	-3.22208	Mig1	YGR045C	6.10738
Hac1	YDR210W	-1.2	Hac1	MPA43	-1.66538	Mig1	ARN2	2.05732	Gat4	ATP11	-1.39579	Sut2	YNL134C	-4.58868	Mig1	HXK1	4.7682
Hac1	HLR1	-1.3	Hac1	MCD4	-1.6828	Mig1	REG2	2.05452	Gat4	INO1	-1.40577	Sut1	ENB1	10.0961	Mig1	REG2	3.36441
Hac1	PMI40	-1.3	Hac1	PMT3	-1.70844	Mig1	MAL12	2.01209	Gat4	ATP3	-1.42021	Sut1	BSC1	6.62373	Mig1	GSY1	2.81325
Hac1	DOG1	-1.3	Hac1	HOP1	-1.76542	Mig1	YFL051C	1.91447	Gat4	MRPL23	-1.42457	Sut1	FLO11	5.67732	Mig1	MAL31	2.64482
Hac1	MPD1	-1.3	Hac1	THI20	-1.7689	Mig1	YKR075C	1.8469	Gat4	FZF1	-1.43589	Sut1	YDL241W	5.38621	Mig1	MTH1	2.56512
Hac1	TSA1	-1.3	Hac1	TIR1	-1.77054	Mig1	FMP45	1.81196	Gat4	SSA4	-1.43974	Sut1	HXT2	4.19301	Mig1	YPK2	2.26019
Hac1	ERP2	-1.3	Hac1	SCS3	-1.77811	Mig1	FUS1	1.79891	Gat4	HSP104	-1.46673	Sut1	FRE4	4.1803	Mig1	MAL12	2.20705
Hac1	TIM10	-1.3	Hac1	MPD1	-1.83683	Mig1	CTR1	1.76111	Gat4	SGA1	-1.49667	Sut1	YOL014W	3.51443	Mig1	YNL144C	2.14337
Hac1	YET2	-1.3	Hac1	HXT11	-1.84675	Mig1	ADR1	1.7611	Gat4	PRM5	-1.51589	Sut1	SUT2	3.28451	Mig1	MPC3	1.99519
Hac1	THI2	-1.3	Hac1	HEM15	-1.8504	Mig1	HXT3	1.75663	Gat4	NAM9	-1.51761	Sut1	ARO9	3.13265	Mig1	GUT1	1.73892
Hac1	RPS30a	-1.3	Hac1	SPO13	-1.86849	Mig1	RPM2	1.7334	Gat4	AGA2	-1.52492	Sut1	RRN11	3.09044	Mig1	HXT4	1.71743
Hac1	HNM1	-1.4	Hac1	BNA2	-1.88913	Mig1	HXT4	1.62838	Gat4	OYE3	-1.58383	Sut1	TIR1	3.02702	Mig1	MAL33	1.61333
Hac1	MCD4	-1.4	Hac1	YDR210W	-1.89533	Mig1	TDA1	1.54438	Gat4	YNR014W	-1.58522	Sut1	AAC3	2.97607	Mig1	RPM2	1.50348
Hac1	TDH3	-1.4	Hac1	SGA1	-1.90318	Mig1	YPK2	1.51052	Gat4	YHR138C	-1.59018	Sut1	FCY2	2.9325	Mig1	ICS3	1.49377
Hac1	SIL1	-1.4	Hac1	GIP1	-1.90706	Mig1	FIT2	1.44715	Gat4	CWP1	-1.59162	Sut1	SUT1	2.64674	Mig1	YMR103C	1.47415
Hac1	RPL29	-1.4	Hac1	ULI1	-1.91792	Mig1	ECL1	1.41595	Gat4	STE2	-1.66967	Sut1	GPX2	2.57137	Mig1	HXT3	1.42867
Hac1	CWP2	-1.5	Hac1	DOG2	-1.91987	Mig1	HXT5	1.38998	Gat4	MRPL35	-1.69535	Sut1	DSE4	2.47412	Mig1	YIL024C	1.38102
Hac1	OYE2	-1.5	Hac1	YOR289W	-1.97532	Mig1	MAL33	1.38619	Gat4	PAU5	-1.70449	Sut1	HMG1	2.37597	Mig1	UBP11	1.32613
Hac1	RPS27b	-1.5	Hac1	OPI3	-2.03061	Mig1	ALD6	1.37767	Gat4	PET111	-1.74486	Sut1	MAE1	2.29638	Mig1	GAL4	1.30159
Hac1	PTR2	-1.6	Hac1	HAC1	-2.12566	Mig1	PLB2	1.35695	Gat4	THI72	-1.84207	Sut1	OPT2	2.28963	Mig1	IMA1	1.23741
Hac1	SEM1	-1.6	Hac1	RTA1	-2.14103	Mig1	JEN1	1.32918	Gat4	STP4	-1.88638	Sut1	DHR2	2.22721	Mig1	SNF3	1.1962
Hac1	URH1	-1.6	Hac1	YFL040W	-2.17236	Mig1	HXT1	1.27356	Gat4	GAD1	-1.97187	Sut1	NDE1	2.21355	Mig1	AQY3	1.15504
Hac1	UTR2	-1.7	Hac1	THI12	-2.18046	Mig1	ADE4	1.22962	Gat4	AGX1	-1.9731	Sut1	GUP2	2.15743	Mig1	SUC2	1.13112
Hac1	YIP3	-1.7	Hac1	GAL7	-2.23598	Mig1	CAT8	1.20455	Gat4	SPI1	-2.00913	Sut1	UTP15	2.1555	Mig1	ODC1	1.12293
Hac1	HAC1	-1.8	Hac1	SPS1	-2.31683	Mig1	AQR1	1.13053	Gat4	DDR48	-2.02763	Sut1	NRP1	2.15207	Mig1	SUE1	1.11527
Hac1	RPL18b	-1.8	Hac1	PBI2	-2.34434	Mig1	CSR2	1.07588	Gat4	YNL134C	-2.02865	Sut1	RPA43	2.14072	Mig1	HXT1	1.06571
Hac1	YER156C	-1.8	Hac1	DSF1	-2.35969	Mig1	PRM7	1.04946	Gat4	PDC6	-2.03047	Sut1	ISU2	2.09509	Mig1	HXT5	1.05649
Hac1	CCW12	-1.9	Hac1	THI5	-2.45061	Mig1	YFL054C	1.04139	Gat4	CWP2	-2.06106	Sut1	YML131W	2.06673	Mig1	ARO9	1.03529
Hac1	DYN2	-1.9	Hac1	SOR1	-2.58455	Mig1	ENO1	-1.04836	Gat4	GDB1	-2.08377	Sut1	IPI3	2.05377	Mig1	ALT1	1.02375
Hac1	YGP1	-2	Hac1	STE3	-3.19711	Mig1	AYR1	-1.05212	Gat4	YJR096W	-2.11382	Sut1	DBP7	2.05365	Mig1	TDH1	-1.00043
Hac1	THI20	-2.2	Hac1	YET2	-3.23828	Mig1	PCL1	-1.19431	Gat4	PDR15	-2.12534	Sut1	REX4	2.03676	Mig1	TIP1	-1.0554
Hac1	YRO2	-2.5	Hac1	KAR2	-3.26599	Mig1	ERO1	-1.2743	Gat4	YJL213W	-2.15371	Sut1	RIX7	2.01586	Mig1	YDR222W	-1.05976
Hac1	TDH1	-2.6	Hac1	DOG1	-3.42831	Mig1	GRE3	-1.55081	Gat4	GLC3	-2.21626	Sut1	GFD2	2.00569	Mig1	MOH1	-1.10585
Hac1	KAR2	-2.6	Hac1	TDH1	-4.49929	Mig1	YGP1	-1.55263	Gat4	YNL234W	-2.26005	Sut1	TRM11	2.00161	Mig1	YNL234W	-1.13895
Hac1	RPS22b	-3.1	Hac1	INO1	-5.46854	Mig1	HSP82	-1.90978	Gat4	ICS2	-2.26123	Sut1	DUS3	1.98301	Mig1	PIR3	-1.14366
Thi2	HXT2	3.69306	Gsm1	FAA4	1.0959	Mig1	TDH1	-2.01056	Gat4	TFS1	-2.31614	Sut1	GDH1	1.97802	Mig1	YER079W	-1.16023
Thi2	PIR3	3.36425	Gsm1	FET3	2.82941	Mig1	CPR6	-2.12537	Gat4	PRM2	-2.34109	Sut1	ACO2	1.94274	Mig1	HBT1	-1.28064
Thi2	PDC6	2.69676	Gsm1	HRP1	1.2992	Mig1	HSP26	-2.62189	Gat4	YEL073C	-2.35627	Sut1	JJJ3	1.92884	Mig1	GND2	-1.34884
Thi2	MEK1	2.65422	Gsm1	PUS1	1.23431	Mig1	INO1	-3.31536	Gat4	ARI1	-2.36443	Sut1	IMP3	1.90394	Mig1	FMP45	-1.35251
Thi2	VID24	2.41117	Gsm1	ZPR1	1.13332	Mig1	MIG1	-4.39166	Gat4	YMR090W	-2.40618	Sut1	SSF1	1.90363	Mig1	HSP26	-1.37207
Thi2	NFS1	2.28641	Gsm1	COX5a	1.08848	Cat8	PHO89	3.17004	Gat4	TKL2	-2.4282	Sut1	DIP2	1.87343	Mig1	FMP48	-1.3924
Thi2	SPR1	2.26218	Gsm1	VPS68	-1.13008	Cat8	PUT4	2.85889	Gat4	DER1	-2.49888	Sut1	HCA4	1.86328	Mig1	ICS2	-1.43229
Thi2	FUS1	2.25925	Gsm1	MCH4	-1.20208	Cat8	BAR1	2.63623	Gat4	ENO1	-2.54812	Sut1	RFU1	1.85144	Mig1	HSP12	-1.65493
Thi2	ZRT1	2.1454	Gsm1	YNL208W	-1.24532	Cat8	CWP1	2.42295	Gat4	GPM2	-2.58126	Sut1	NOP13	1.8498	Mig1	MIG1	-10.7689
Thi2	CTS1	2.12095	Gsm1	ERO1	-1.25527	Cat8	STE2	2.3834	Gat4	FMS1	-2.63589	Sut1	CAR2	1.84946
Thi2	PMA2	2.07485	Gsm1	YGR161W-B	-1.33516	Cat8	PHO84	2.07316	Gat4	THI20	-2.66983	Sut1	UTP13	1.83986
Thi2	MET17	2.00654	Gsm1	AIM19	-1.57861	Cat8	FRE2	2.05769	Gat4	SPS100	-2.68285	Sut1	ERB1	1.83925
Thi2	YDL218W	1.87866	Gsm1	SPO19	-1.74825	Cat8	REG2	2.05452	Gat4	HBT1	-2.69495	Sut1	YVH1	1.83897
Thi2	HES1	1.85239	Gsm1	EGH1	-1.86542	Cat8	STE6	1.95433	Gat4	SPS4	-2.71124	Sut1	UTP25	1.83241
Thi2	RDL1	1.83281	Gsm1	ECM8	-2.19731	Cat8	FMP45	1.81196	Gat4	OM45	-2.74472	Sut1	ADE4	1.83015
Thi2	LEU2	1.75498	Stp4	NDE1	2.52121	Cat8	CTR1	1.76111	Gat4	GSY1	-2.76911	Sut1	RRN7	1.78894
Thi2	PDC5	1.68905	Stp4	VAC17	1.98186	Cat8	RGI1	1.68478	Gat4	YGR066C	-2.77936	Sut1	MRD1	1.77336
Thi2	ADY3	1.53636	Stp4	YOL019W	1.45881	Cat8	SPG4	1.60477	Gat4	MPD1	-2.82907	Sut1	DBP8	1.76387
Thi2	LYS1	1.50894	Stp4	VHR2	1.05665	Cat8	ICL1	1.58704	Gat4	HXT5	-2.84378	Sut1	BRX1	1.75756
Thi2	ECM4	1.50478	Stp4	NOP2	1.05621	Cat8	POT1	1.57288	Gat4	URH1	-2.93335	Sut1	RRP14	1.75121
Thi2	PET9	1.50205	Stp4	YGP1	-1.02954	Cat8	YIL169C	1.5256	Gat4	PDC5	-2.94655	Sut1	UTP21	1.73829
Thi2	SPO21	1.44657	Stp4	YJL017W	-1.06025	Cat8	BOP2	1.51593	Gat4	WSC4	-2.977	Sut1	RPA135	1.73093
Thi2	PGM2	1.43736	Stp4	YET3	-1.0625	Cat8	MEF1	1.4593	Gat4	ERO1	-2.99499	Sut1	ENP1	1.72765
Thi2	SAF1	1.38786	Stp4	KTR2	-1.06349	Cat8	IDP2	1.37825	Gat4	RNR3	-3.01194	Sut1	LCP5	1.72044
Thi2	MDH2	1.34954	Stp4	YPL247C	-1.0667	Cat8	ALD6	1.37767	Gat4	PNS1	-3.028	Sut1	SPT21	1.71041
Thi2	HEK2	1.19992	Stp4	YRO2	-1.10981	Cat8	KNH1	1.33573	Gat4	BAR1	-3.08495	Sut1	TSR2	1.67807
Thi2	BAT1	1.18462	Stp4	ATG34	-1.22849	Cat8	JEN1	1.32918	Gat4	FMP48	-3.12669	Sut1	HAS1	1.66753
Thi2	BAR1	1.18308	Stp4	PUN1	-1.29546	Cat8	GDH2	1.32874	Gat4	PIR3	-3.2109	Sut1	DRS1	1.66486
Thi2	PIR1	1.05875	Stp4	DUR3	-1.35325	Cat8	ALP1	1.32284	Gat4	HSP31	-3.35387	Sut1	ECM16	1.65622
Thi2	GUT1	1.03995	Stp4	YPL014W	-1.4074	Cat8	ISU2	1.3188	Gat4	USV1	-3.41543	Sut1	CIC1	1.65044
Thi2	YNL115C	1.02028	Stp4	HST2	-1.43226	Cat8	BTN2	1.23363	Gat4	RCK1	-3.47985	Sut1	AQR1	1.63785
Thi2	PMT2	-1	Stp4	YPS1	-1.4422	Cat8	CAT8	1.20455	Gat4	RTC3	-3.54121	Sut1	YHB1	1.63658
Thi2	GPX2	-1.1	Stp4	ATG5	-1.50548	Cat8	FDH1	1.17067	Gat4	AGA1	-3.57152	Sut1	URA3	1.62884
Thi2	ENO1	-1.1	Stp4	UGA2	-1.55347	Cat8	SDH1	1.13648	Gat4	SOL4	-3.71306	Sut1	NIP7	1.62485
Thi2	ADH1	-1.1	Stp4	AIM19	-1.57861	Cat8	CLB2	1.06264	Gat4	SPG4	-3.77234	Sut1	ALB1	1.61955
Thi2	SEC72	-1.1	Stp4	TPO2	-1.63863	Cat8	ATO3	1.04999	Gat4	THI13	-3.78881	Sut1	TIR4	1.61215
Thi2	PDC1	-1.1	Stp4	YDC1	-1.67747	Cat8	YRO2	-1.14542	Gat4	THI12	-3.83542	Sut1	NMD3	1.59915
Thi2	SDO1	-1.1	Stp4	MPD1	-1.83683	Cat8	KAR2	-3.0319	Gat4	CTT1	-3.90433	Sut1	RKI1	1.59828
Thi2	RPL22b	-1.1	Stp4	TPO4	-2.63767	Cat8	INO1	-3.31536	Gat4	HSP26	-3.9737	Sut1	NOP2	1.59568
Thi2	RPL26a	-1.1	Pdr8	CTT1	1.34545	Ixr1	YDR098C-A	4.91676	Gat4	YDL124W	-4.00716	Sut1	NOP12	1.5949
Thi2	RPL26b	-1.1	Pdr8	GPX2	-1.07798	Ixr1	FIT1	3.54322	Gat4	PHM7	-4.017	Sut1	LTV1	1.56885
Thi2	RPL27b	-1.1	Pdr8	YMR315W	-1.10538	Ixr1	PHO89	3.17004	Gat4	PAI3	-4.10219	Sut1	RLP24	1.56826
Thi2	RPL40b	-1.1	Pdr8	PDR8	-1.3097	Ixr1	PIR3	3.10377	Gat4	TDH1	-4.35818	Sut1	PWP1	1.56805
Thi2	RPS19a	-1.1	Pdr8	MUM3	-1.39931	Ixr1	IMD2	2.97342	Gat4	YET2	-4.70773	Sut1	RPS15	1.55282
Thi2	SUI1	-1.1	Pdr8	YFL040W	-2.17236	Ixr1	PUT4	2.85889	Gat4	DCS2	-4.75402	Sut1	TIP1	1.54527
Thi2	GPI15	-1.1	Mal13	BIK1	1.28884	Ixr1	IZH4	2.53436	Gat4	ALD3	-5.02661	Sut1	RNT1	1.53684
Thi2	MIX23	-1.1	Mal13	MCH4	-1.20208	Ixr1	HXK1	2.48102	Gat4	YLR042C	-6.84877	Sut1	BUD22	1.53004
Thi2	RPS25b	-1.1	Mal13	MAL13	-1.29343	Ixr1	HXT2	2.4797	Gat4	HSP12	-9.04697	Sut1	ESF2	1.52979
Thi2	PHO3	-1.2	Mal13	MAL12	-1.34411	Ixr1	STE2	2.3834	Gat4	YAR028W	-11.0348	Sut1	REA1	1.52965
Thi2	RET3	-1.2	Pdr3	SIT1	3.2006	Ixr1	MTH1	2.37933	Gat4	GIT1	-12.0879	Sut1	UTP14	1.52927
Thi2	RPL16a	-1.2	Pdr3	FET3	2.82941	Ixr1	FIT3	2.24073	Znf1	BSC1	6.77531	Sut1	FAF1	1.51274
Thi2	RPL42b	-1.2	Pdr3	CTR3	2.55854	Ixr1	ZNF1	2.18733	Znf1	BAT2	4.68646	Sut1	ZDS2	1.4985
Thi2	RPS17a	-1.2	Pdr3	NDE1	2.52121	Ixr1	CAR2	2.17885	Znf1	ARG4	2.45844	Sut1	IFH1	1.464
Thi2	SCW4	-1.3	Pdr3	MET6	2.27819	Ixr1	SER3	2.15915	Znf1	PHO5	2.37198	Sut1	NAN1	1.46203
Thi2	ENO2	-1.3	Pdr3	HSP12	2.23472	Ixr1	ARN2	2.05732	Znf1	GPX2	1.83191	Sut1	ERG11	1.45214
Thi2	FBA1	-1.3	Pdr3	FIT1	2.20538	Ixr1	CIT1	1.987	Znf1	AQR1	1.45422	Sut1	NOC3	1.44238
Thi2	HSP10	-1.3	Pdr3	SPB1	1.97584	Ixr1	ATG39	1.88837	Znf1	TIS11	1.37373	Sut1	RRS1	1.43702
Thi2	TIM10	-1.3	Pdr3	FTR1	1.88254	Ixr1	YKR075C	1.8469	Znf1	CDC21	1.28721	Sut1	GUA1	1.43604
Thi2	THI2	-1.3	Pdr3	HIS4	1.86943	Ixr1	HXT3	1.75663	Znf1	IZH4	1.22335	Sut1	RPF2	1.41972
Thi2	RPS30a	-1.3	Pdr3	CAR1	1.80795	Ixr1	NRT1	1.75246	Znf1	FRE3	1.18367	Sut1	ASH1	1.41822
Thi2	HNM1	-1.4	Pdr3	IRC7	1.76016	Ixr1	RPM2	1.7334	Znf1	VHR2	1.17408	Sut1	AIR1	1.40891
Thi2	TDH3	-1.4	Pdr3	YCR051W	1.73803	Ixr1	HXT4	1.62838	Znf1	TOS4	1.10246	Sut1	NOG2	1.4072
Thi2	RPL29	-1.4	Pdr3	KRR1	1.71853	Ixr1	PRM1	1.61164	Znf1	ADE1	1.04628	Sut1	IPI1	1.40293
Thi2	RPL42a	-1.4	Pdr3	PWP2	1.71164	Ixr1	FUS3	1.60476	Znf1	ASF1	1.03188	Sut1	RLP7	1.40055
Thi2	THI4	-1.5	Pdr3	NCE102	1.67273	Ixr1	HPF1	1.5825	Znf1	ICT1	-1.00485	Sut1	BMS1	1.39894
Thi2	RPS27b	-1.5	Pdr3	BUD23	1.66875	Ixr1	YIL169C	1.5256	Znf1	GCV1	-1.0066	Sut1	VTS1	1.39534
Thi2	PTR2	-1.6	Pdr3	TUP1	1.6176	Ixr1	FIG1	1.52539	Znf1	SCP1	-1.03134	Sut1	SQT1	1.39093
Thi2	RPS27a	-1.6	Pdr3	THR4	1.60707	Ixr1	PYK2	1.40321	Znf1	YRO2	-1.19088	Sut1	DBP9	1.38772
Thi2	TIP1	-1.7	Pdr3	AQR1	1.51102	Ixr1	RTS3	1.40125	Znf1	MSS1	-1.21389	Sut1	FDO1	1.35461
Thi2	RPS30b	-1.7	Pdr3	PUT4	1.49839	Ixr1	HXT5	1.38998	Znf1	OPY1	-1.23653	Sut1	FAA4	1.33878
Thi2	RPS9a	-1.7	Pdr3	MUP3	1.48603	Ixr1	IDP2	1.37825	Znf1	OYE2	-1.34114	Sut1	RHO3	1.33343
Thi2	THI73	-2	Pdr3	ILV2	1.41487	Ixr1	ALD6	1.37767	Znf1	ATG34	-1.44814	Sut1	CDC21	1.32923
Thi2	THI20	-2.2	Pdr3	MAE1	1.39908	Ixr1	PLB2	1.35695	Znf1	YIL001W	-1.89923	Sut1	SAP185	1.32647
Thi2	TDH1	-2.6	Pdr3	Ho	1.37153	Ixr1	GUT2	1.33564	Znf1	MET14	-1.97535	Sut1	EBP2	1.31861
Thi2	RPS22b	-3.1	Pdr3	FIT2	1.36488	Ixr1	NRG2	1.32975	Znf1	ERJ5	-2.31245	Sut1	RRB1	1.30951
Thi2	THI7	-3.1	Pdr3	PHO4	1.36428	Ixr1	YNL058C	1.32943	Znf1	GPX1	-3.30722	Sut1	CYC1	1.30821
Ino4	HXK1	4.0661	Pdr3	CTT1	1.34545	Ixr1	IZH1	1.32865	Znf1	HSP12	-9.04697	Sut1	HOF1	1.30347
Ino4	PHO89	3.7189	Pdr3	ERG4	1.34246	Ixr1	MSN4	1.28925	Sip4	BAT2	4.68646	Sut1	ELG1	1.30324
Ino4	HXT2	3.69306	Pdr3	HMX1	1.32688	Ixr1	HXT1	1.27356	Sip4	SIP4	3.77872	Sut1	IMP4	1.30215
Ino4	SRX1	3.68261	Pdr3	HRP1	1.2992	Ixr1	IXR1	1.26971	Sip4	KIN3	2.71356	Sut1	ERG28	1.29767
Ino4	IMD2	3.28626	Pdr3	BIK1	1.28884	Ixr1	CLB1	1.24933	Sip4	ACS1	2.61314	Sut1	VHR2	1.29516
Ino4	ICL1	2.81515	Pdr3	HXT2	1.28836	Ixr1	EXG1	1.24032	Sip4	PAU12	2.31986	Sut1	KRI1	1.28899
Ino4	GPH1	2.73723	Pdr3	HIS7	1.25391	Ixr1	TKL2	1.23836	Sip4	SAM4	2.14093	Sut1	NOC2	1.2733
Ino4	MET6	2.59598	Pdr3	SDA1	1.23494	Ixr1	YBL101W-A	1.23105	Sip4	ZDS2	2.13428	Sut1	FIT2	1.26187
Ino4	ACH1	2.56891	Pdr3	ISU2	1.22973	Ixr1	GPA1	1.20084	Sip4	TRF5	1.89263	Sut1	GAR1	1.23388
Ino4	HXT14	2.47035	Pdr3	SAM3	1.21353	Ixr1	TIR4	1.14273	Sip4	GPX2	1.83191	Sut1	AAH1	1.23201
Ino4	TMA10	2.40195	Pdr3	RIX7	1.16328	Ixr1	AQR1	1.13053	Sip4	YBL028C	1.70862	Sut1	RPF1	1.22404
Ino4	SPR1	2.26218	Pdr3	IZH1	1.15726	Ixr1	QDR2	1.09998	Sip4	PYC1	1.69336	Sut1	HMS1	1.2175
Ino4	FUS1	2.25925	Pdr3	BUD31	1.15333	Ixr1	ATO3	1.04999	Sip4	DRE2	1.65458	Sut1	RRN3	1.21144
Ino4	SPO11	2.24817	Pdr3	MET17	1.15129	Ixr1	SAM1	1.04649	Sip4	STB1	1.64226	Sut1	PPM2	1.20637
Ino4	FLO11	2.24748	Pdr3	MDN1	1.14394	Ixr1	LYS20	1.04454	Sip4	YHR127W	1.53681	Sut1	SLP1	1.19272
Ino4	SPO13	2.2421	Pdr3	YIL169C	1.12021	Ixr1	RPS14b	1.02793	Sip4	AQR1	1.45422	Sut1	PHO90	1.19148
Ino4	HOP1	2.24135	Pdr3	UTP14	1.11432	Ixr1	VMA22	-1.02069	Sip4	ISU2	1.32898	Sut1	DUG3	1.19053
Ino4	YPR078C	2.24134	Pdr3	NIP7	1.10542	Ixr1	PRY2	-1.02894	Sip4	CDC21	1.28721	Sut1	TIR2	1.1753
Ino4	SPS22	2.21699	Pdr3	NSA1	1.10283	Ixr1	HRI1	-1.0457	Sip4	RPS1B	1.2384	Sut1	NET1	1.16474
Ino4	ZRT1	2.1454	Pdr3	FUR1	1.08967	Ixr1	ERP2	-1.05905	Sip4	ETT1	1.2022	Sut1	MLO50	1.14655
Ino4	GAD1	2.07181	Pdr3	EGT2	1.08817	Ixr1	MET3	-1.07359	Sip4	ADE1	1.04628	Sut1	YPL245W	1.14147
Ino4	YMR206W	2.03222	Pdr3	NOP4	1.08397	Ixr1	PMT3	-1.18132	Sip4	NSA1	1.00335	Sut1	RRP12	1.13165
Ino4	CRC1	2.02081	Pdr3	SRO9	1.08081	Ixr1	YDR210W	-1.18581	Sip4	ICT1	-1.00485	Sut1	MTR4	1.12963
Ino4	MMP1	1.99114	Pdr3	NOP7	1.06613	Ixr1	YDC1	-1.20785	Sip4	GCV1	-1.0066	Sut1	BMT6	1.12251
Ino4	PHO5	1.96325	Pdr3	GTT1	1.06101	Ixr1	GRX1	-1.26428	Sip4	SEC72	-1.03452	Sut1	ERG26	1.11752
Ino4	FIG2	1.90088	Pdr3	PWP1	1.06005	Ixr1	ERO1	-1.2743	Sip4	AZR1	-1.03931	Sut1	FET4	1.11612
Ino4	LSC2	1.89616	Pdr3	FCF2	1.04416	Ixr1	FLO5	-1.35019	Sip4	PRM4	-1.04452	Sut1	NIS1	1.11375
Ino4	SGA1	1.88433	Pdr3	BMS1	1.04155	Ixr1	PDI1	-1.38096	Sip4	MRPL9	-1.07059	Sut1	UPC2	1.10436
Ino4	RRT12	1.88348	Pdr3	GAR1	1.03231	Ixr1	YAL044W-A	-1.46048	Sip4	YBR056W	-1.11106	Sut1	GCV2	1.07846
Ino4	FKS3	1.86991	Pdr3	NMD3	1.02744	Ixr1	CWP2	-1.4847	Sip4	ARC35	-1.13125	Sut1	NOG1	1.05889
Ino4	MTH1	1.84113	Pdr3	YVH1	1.01939	Ixr1	YGP1	-1.55263	Sip4	MSS1	-1.21389	Sut1	ETT1	1.05303
Ino4	HXT4	1.82192	Pdr3	ALD4	1.0136	Ixr1	UBX6	-1.71836	Sip4	MIC27	-1.23625	Sut1	GCV1	1.03327
Ino4	YOL024W	1.80191	Pdr3	SAM1	1.01221	Ixr1	TDH1	-2.01056	Sip4	OPY1	-1.23653	Sut1	SPA2	1.02332
Ino4	EMI2	1.79446	Pdr3	YTM1	1.01088	Ixr1	YET2	-2.16314	Sip4	IGO1	-1.29813	Sut1	RNR1	1.01313
Ino4	ZIP1	1.78743	Pdr3	KIN3	1.00537	Ixr1	MIG1	-4.39166	Sip4	CLN1	-1.30552	Sut1	HEL2	1.01068
Ino4	VHT1	1.76496	Pdr3	PRE3	-1.00158	Msn4	FIT1	3.54322	Sip4	EDC2	-1.30998	Sut1	WTM1	-1.00328
Ino4	LEU2	1.75498	Pdr3	PDR3	-1.00998	Msn4	MPC3	3.40387	Sip4	OYE2	-1.34114	Sut1	HSP78	-1.00755
Ino4	FET3	1.75393	Pdr3	IML2	-1.01705	Msn4	PHO89	3.17004	Sip4	ATP11	-1.39579	Sut1	NNF1	-1.03102
Ino4	UGX2	1.72892	Pdr3	UBP7	-1.02776	Msn4	PIR3	3.10377	Sip4	RSM19	-1.46503	Sut1	FHN1	-1.03256
Ino4	SPR3	1.60754	Pdr3	YGP1	-1.02954	Msn4	CTR3	3.09977	Sip4	OCH1	-1.46975	Sut1	MGP12	-1.0342
Ino4	DAK2	1.60216	Pdr3	HUL5	-1.03193	Msn4	FET3	2.99952	Sip4	MET14	-1.97535	Sut1	DMA2	-1.03756
Ino4	MSH5	1.56547	Pdr3	YJR107W	-1.04914	Msn4	IMD2	2.97342	Sip4	MLS1	-2.06933	Sut1	GUT2	-1.04736
Ino4	IZH4	1.5654	Pdr3	UGO1	-1.0493	Msn4	PUT4	2.85889	Sip4	TDA1	-2.96019	Sut1	FBP1	-1.04785
Ino4	BPH1	1.55866	Pdr3	TPS1	-1.05247	Msn4	BAR1	2.63623	Sut2	BSC1	6.77531	Sut1	BXI1	-1.051
Ino4	FMP48	1.52329	Pdr3	RCN1	-1.06914	Msn4	IZH4	2.53436	Sut2	ZRT1	5.94064	Sut1	QCR8	-1.05116
Ino4	CCC2	1.49678	Pdr3	GPX2	-1.07798	Msn4	TNA1	2.51822	Sut2	ARO9	5.05701	Sut1	RIM11	-1.05889
Ino4	SSK22	1.49232	Pdr3	CPR6	-1.08387	Msn4	HXK1	2.48102	Sut2	BAT2	4.68646	Sut1	CAK1	-1.05983
Ino4	PAU23	1.47118	Pdr3	YRO2	-1.10981	Msn4	HXT2	2.4797	Sut2	CAR2	3.71385	Sut1	RTS3	-1.06589
Ino4	PGM2	1.43736	Pdr3	MYO3	-1.12289	Msn4	CWP1	2.42295	Sut2	SSU1	3.42562	Sut1	ATP17	-1.06897
Ino4	YJL045W	1.42118	Pdr3	PLB1	-1.13724	Msn4	STE2	2.3834	Sut2	FRE4	2.69556	Sut1	MGA1	-1.07808
Ino4	YIL055C	1.411	Pdr3	EHT1	-1.14127	Msn4	ZNF1	2.18733	Sut2	SUT2	2.58218	Sut1	EHD3	-1.08939
Ino4	REC102	1.36672	Pdr3	AAD14	-1.14548	Msn4	CAR2	2.17885	Sut2	YOR338W	2.56152	Sut1	UBX6	-1.09628
Ino4	BUD5	1.36626	Pdr3	GDB1	-1.15	Msn4	ECM13	2.1225	Sut2	PHO5	2.37198	Sut1	MET6	-1.10242
Ino4	NQM1	1.35302	Pdr3	PGM2	-1.18244	Msn4	PHO84	2.07316	Sut2	GAS3	2.13146	Sut1	QRI7	-1.10249
Ino4	SKM1	1.30257	Pdr3	YBR241C	-1.18427	Msn4	RGI2	2.07215	Sut2	PRR2	2.06831	Sut1	DOT5	-1.10938
Ino4	SAP4	1.29098	Pdr3	YPS6	-1.2052	Msn4	ARN2	2.05732	Sut2	PHO11	1.90507	Sut1	APA2	-1.11396
Ino4	RGT2	1.28856	Pdr3	YHC3	-1.21662	Msn4	REG2	2.05452	Sut2	ECM1	1.84261	Sut1	MET2	-1.12887
Ino4	PLM2	1.28305	Pdr3	SLI1	-1.22523	Msn4	MAL12	2.01209	Sut2	STB1	1.64226	Sut1	MSK1	-1.13235
Ino4	PRM10	1.28192	Pdr3	ATG34	-1.22849	Msn4	FAR1	1.99493	Sut2	AQR1	1.45422	Sut1	MRPS12	-1.13723
Ino4	SAM3	1.28073	Pdr3	MSP1	-1.23372	Msn4	CIT1	1.987	Sut2	RRP7	1.32596	Sut1	PPN2	-1.16715
Ino4	PHR1	1.25778	Pdr3	YLR345W	-1.23515	Msn4	FTR1	1.97273	Sut2	CDC21	1.28721	Sut1	YLR042C	-1.16968
Ino4	UBP11	1.25523	Pdr3	DIT1	-1.24787	Msn4	STE6	1.95433	Sut2	IZH4	1.22335	Sut1	GLO1	-1.17487
Ino4	FRE2	1.25445	Pdr3	FMS1	-1.25119	Msn4	CAR1	1.94209	Sut2	FHN1	1.18276	Sut1	MAM33	-1.18791
Ino4	IZH1	1.23929	Pdr3	YIL108W	-1.25396	Msn4	YFL051C	1.91447	Sut2	VHR2	1.17408	Sut1	ATG19	-1.19808
Ino4	OSW2	1.23859	Pdr3	ERO1	-1.25527	Msn4	ATG39	1.88837	Sut2	TOS4	1.10246	Sut1	YER158C	-1.21294
Ino4	MUM3	1.22122	Pdr3	HNT2	-1.25983	Msn4	YKR075C	1.8469	Sut2	GOS1	1.03341	Sut1	PUT2	-1.21374
Ino4	TOP2	1.18532	Pdr3	FMP23	-1.26209	Msn4	FMP45	1.81196	Sut2	ASF1	1.03188	Sut1	RIE1	-1.2145
Ino4	PDR11	1.17363	Pdr3	RMR1	-1.26889	Msn4	FUS1	1.79891	Sut2	ERG11	1.02995	Sut1	ATP2	-1.2235
Ino4	DAL4	1.17255	Pdr3	FYV10	-1.2791	Msn4	YHR033W	1.79313	Sut2	NNF1	1.02456	Sut1	SHY1	-1.22502
Ino4	PGS1	1.13256	Pdr3	ZWF1	-1.30058	Msn4	CTR1	1.76111	Sut2	ICT1	-1.00485	Sut1	QCR10	-1.22959
Ino4	BAP3	1.11751	Pdr3	PCK1	-1.30554	Msn4	ADR1	1.7611	Sut2	GCV1	-1.0066	Sut1	ITR1	-1.23563
Ino4	NCA2	1.09551	Pdr3	PEP12	-1.31146	Msn4	HXT3	1.75663	Sut2	SCP1	-1.03134	Sut1	PET191	-1.23906
Ino4	YGL039W	1.06448	Pdr3	YGL117W	-1.31202	Msn4	FRE1	1.70638	Sut2	YIR016W	-1.03203	Sut1	YKR011C	-1.26662
Ino4	GUT1	1.03995	Pdr3	GRE3	-1.33544	Msn4	SNZ1	1.68943	Sut2	MRPS9	-1.05487	Sut1	ACH1	-1.26799
Ino4	GCY1	1.03737	Pdr3	YLR194C	-1.33545	Msn4	RGI1	1.68478	Sut2	MRPL9	-1.07059	Sut1	ARA2	-1.26843
Ino4	CHS6	1.03208	Pdr3	MOH1	-1.33747	Msn4	IME2	1.67338	Sut2	DOT5	-1.09176	Sut1	COX17	-1.28936
Ino4	PST2	1.01158	Pdr3	SSA1	-1.33832	Msn4	SST2	1.62964	Sut2	YBR056W	-1.11106	Sut1	PIC2	-1.30378
Ino4	ERO1	-1	Pdr3	MAL12	-1.34411	Msn4	HXT4	1.62838	Sut2	ARC35	-1.13125	Sut1	FMP40	-1.30761
Ino4	TPM1	-1	Pdr3	BDH2	-1.34509	Msn4	OSW1	1.61566	Sut2	BMH2	-1.1371	Sut1	MIC19	-1.30829
Ino4	LHS1	-1	Pdr3	TOS3	-1.35007	Msn4	PRM1	1.61164	Sut2	ARA1	-1.15363	Sut1	MDH1	-1.30839
Ino4	OPI1	-1	Pdr3	DUR3	-1.35325	Msn4	SPG4	1.60477	Sut2	MPD2	-1.17146	Sut1	YKL162C	-1.34434
Ino4	HEM15	-1	Pdr3	SEO1	-1.36773	Msn4	ICL1	1.58704	Sut2	ECL1	-1.21184	Sut1	SFA1	-1.37427
Ino4	ENO1	-1.1	Pdr3	YHR022C	-1.37102	Msn4	HPF1	1.5825	Sut2	MSS1	-1.21389	Sut1	ALF1	-1.38671
Ino4	CPT1	-1.1	Pdr3	YJL163C	-1.3747	Msn4	POT1	1.57288	Sut2	ABF2	-1.22086	Sut1	IAI11	-1.38729
Ino4	ERG20	-1.1	Pdr3	SPR6	-1.37635	Msn4	INA1	1.56478	Sut2	ATP4	-1.22162	Sut1	UGP1	-1.42378
Ino4	ERG26	-1.1	Pdr3	OYE2	-1.39299	Msn4	CYC3	1.55653	Sut2	MIC27	-1.23625	Sut1	TPK1	-1.43854
Ino4	MGE1	-1.1	Pdr3	SIL1	-1.39813	Msn4	TDA1	1.54438	Sut2	OPY1	-1.23653	Sut1	CIP1	-1.44166
Ino4	SCJ1	-1.1	Pdr3	URA10	-1.40108	Msn4	YIL169C	1.5256	Sut2	LAP2	-1.26043	Sut1	SCO1	-1.45078
Ino4	UBX6	-1.1	Pdr3	DER1	-1.40521	Msn4	FIG1	1.52539	Sut2	LSP1	-1.26109	Sut1	YOX1	-1.45101
Ino4	RPS19a	-1.1	Pdr3	YAL037W	-1.43202	Msn4	BOP2	1.51593	Sut2	PTC7	-1.28682	Sut1	ERJ5	-1.46199
Ino4	CLU1	-1.1	Pdr3	THI72	-1.43753	Msn4	YPK2	1.51052	Sut2	CLN1	-1.30552	Sut1	MDM38	-1.50267
Ino4	SSA2	-1.2	Pdr3	YPS1	-1.4422	Msn4	YMR244W	1.48866	Sut2	SIS1	-1.30593	Sut1	CSR2	-1.50283
Ino4	FPR2	-1.2	Pdr3	LOH1	-1.45703	Msn4	VBA5	1.48479	Sut2	CBP3	-1.30891	Sut1	BMH1	-1.51022
Ino4	INO4	-1.2	Pdr3	YOR385W	-1.46175	Msn4	YJL107C	1.47295	Sut2	MRPL8	-1.31921	Sut1	MRP8	-1.51353
Ino4	MPD1	-1.3	Pdr3	PET117	-1.49377	Msn4	FIT2	1.44715	Sut2	PIL1	-1.44876	Sut1	RSM19	-1.52303
Ino4	TSA1	-1.3	Pdr3	YER187W	-1.51214	Msn4	YDR089W	1.41897	Sut2	RSM19	-1.46503	Sut1	YNK1	-1.55238
Ino4	TIM10	-1.3	Pdr3	OXR1	-1.5123	Msn4	ECL1	1.41595	Sut2	VHS3	-1.46787	Sut1	GAL3	-1.56095
Ino4	POA1	-1.3	Pdr3	YJL213W	-1.53139	Msn4	PYK2	1.40321	Sut2	OCH1	-1.46975	Sut1	YTP1	-1.56897
Ino4	HNM1	-1.4	Pdr3	UGX2	-1.53685	Msn4	STE12	1.39384	Sut2	MRP8	-1.54525	Sut1	YHR140W	-1.57711
Ino4	MCD4	-1.4	Pdr3	RCN2	-1.54828	Msn4	HXT5	1.38998	Sut2	CWP1	-1.59162	Sut1	MRH1	-1.57864
Ino4	UTR2	-1.7	Pdr3	TMC1	-1.56229	Msn4	ARN1	1.38949	Sut2	PRY2	-1.65199	Sut1	YDR248C	-1.58372
Ino4	RPI1	-1.7	Pdr3	YHI9	-1.56372	Msn4	IDP2	1.37825	Sut2	YNL134C	-2.02865	Sut1	POA1	-1.58941
Ino4	YIP3	-1.7	Pdr3	ECM29	-1.57212	Msn4	ALD6	1.37767	Sut2	FUS1	-2.09249	Sut1	FMP10	-1.60373
Ino4	YGP1	-2	Pdr3	TDH2	-1.58494	Msn4	PLB2	1.35695	Sut2	SED1	-2.22602	Sut1	MMF1	-1.6047
Ino4	TDH1	-2.6	Pdr3	SYM1	-1.60519	Msn4	KNH1	1.33573	Sut2	ERJ5	-2.31245	Sut1	SDH5	-1.61419
Ino4	KAR2	-2.6	Pdr3	YIP3	-1.61466	Msn4	GUT2	1.33564	Sut2	MGA1	-2.72892	Sut1	MCP1	-1.61677
Ino4	THI7	-3.1	Pdr3	DIT2	-1.64574	Msn4	NRG2	1.32975	Sut2	ALD4	-2.72948	Sut1	MIX14	-1.6303
Ino4	HSP26	-3.8	Pdr3	UBC11	-1.65341	Msn4	GDH2	1.32874	Sut2	MSN4	-3.09095	Sut1	JHD2	-1.63212
Phd1	SRT1	2.96252	Pdr3	YDL124W	-1.65441	Msn4	IZH1	1.32865	Fyv5	ATG8	-1.36232	Sut1	QDR1	-1.63825
Phd1	MEK1	2.65422	Pdr3	IKS1	-1.66299	Msn4	ISU2	1.3188	Fkh2	ZRT1	5.94064	Sut1	SDH8	-1.6467
Phd1	FUS1	2.25925	Pdr3	IMA1	-1.66502	Msn4	RPN4	1.29459	Fkh2	SRT1	5.34086	Sut1	HEM13	-1.65161
Phd1	FLO11	2.24748	Pdr3	YDC1	-1.67747	Msn4	CCC2	1.29009	Fkh2	GDH2	5.1077	Sut1	MRX10	-1.65686
Phd1	MET17	2.00654	Pdr3	SPR28	-1.71768	Msn4	MSN4	1.28925	Fkh2	ARO9	5.05701	Sut1	CWP2	-1.68375
Phd1	FIT3	1.94419	Pdr3	GDH3	-1.72567	Msn4	SPS2	1.28525	Fkh2	BAT2	4.68646	Sut1	PCL8	-1.72292
Phd1	PTC6	1.84928	Pdr3	SPO1	-1.73554	Msn4	HXT1	1.27356	Fkh2	SIT1	3.78996	Sut1	RNR3	-1.72434
Phd1	ZIP1	1.78743	Pdr3	YKL071W	-1.74734	Msn4	EXG1	1.24032	Fkh2	DSE2	2.97977	Sut1	TPO4	-1.73216
Phd1	CRG1	1.78258	Pdr3	GAS2	-1.77073	Msn4	TKL2	1.23836	Fkh2	SCW11	2.87184	Sut1	ARA1	-1.73237
Phd1	LEU2	1.75498	Pdr3	YNL134C	-1.77673	Msn4	BTN2	1.23363	Fkh2	FRE1	2.67894	Sut1	PFK26	-1.74073
Phd1	LDS2	1.54633	Pdr3	SCS3	-1.77811	Msn4	HBT1	1.23118	Fkh2	SUN4	2.66145	Sut1	ODC1	-1.77012
Phd1	LYS1	1.50894	Pdr3	GRE2	-1.78851	Msn4	FCY2	1.21595	Fkh2	BUD3	2.593	Sut1	YDC1	-1.79181
Phd1	GID7	1.43064	Pdr3	ATG40	-1.82972	Msn4	CAT8	1.20455	Fkh2	SUT2	2.58218	Sut1	DFM1	-1.7925
Phd1	MDH2	1.34954	Pdr3	EMI2	-1.83561	Msn4	YPR078C	1.19187	Fkh2	NAF1	2.39752	Sut1	AIM33	-1.79252
Phd1	SAP4	1.29098	Pdr3	ARO10	-1.84821	Msn4	PUT1	1.17544	Fkh2	PHO5	2.37198	Sut1	YBR056W	-1.83339
Phd1	LSC1	1.26218	Pdr3	EGH1	-1.86542	Msn4	EGT2	1.15215	Fkh2	KTR5	2.28816	Sut1	SIA1	-1.84525
Phd1	HEK2	1.19992	Pdr3	FRE7	-1.89134	Msn4	TIR4	1.14273	Fkh2	TRM11	2.22423	Sut1	DAK2	-1.85408
Phd1	BAT1	1.18462	Pdr3	SGA1	-1.90318	Msn4	CTS1	1.13447	Fkh2	ERG2	2.1638	Sut1	ATP19	-1.85735
Phd1	BAR1	1.18308	Pdr3	GIP1	-1.90706	Msn4	AQR1	1.13053	Fkh2	SAM4	2.14093	Sut1	PRB1	-1.86073
Phd1	YGL039W	1.06448	Pdr3	YHR138C	-1.96512	Msn4	DAK2	1.11825	Fkh2	SPT21	2.13755	Sut1	PDC6	-1.86159
Phd1	PIR1	1.05875	Pdr3	YOR289W	-1.97532	Msn4	SUR7	1.1025	Fkh2	EGT2	2.12398	Sut1	BDH1	-1.87138
Phd1	XRS2	1.04589	Pdr3	IMA2	-2.04734	Msn4	QDR2	1.09998	Fkh2	RKI1	2.11556	Sut1	GRE3	-1.88776
Phd1	ERG11	-1	Pdr3	ADH5	-2.0608	Msn4	VMR1	1.09982	Fkh2	YML131W	2.08908	Sut1	RME1	-1.90916
Phd1	TSC10	-1	Pdr3	HAC1	-2.12566	Msn4	SNQ2	1.09803	Fkh2	MYO1	2.00911	Sut1	YER152C	-1.91964
Phd1	PHD1	-1	Pdr3	RTA1	-2.14103	Msn4	MAE1	1.07855	Fkh2	YNL058C	1.99932	Sut1	NRG2	-1.92624
Phd1	DPM1	-1	Pdr3	YFL040W	-2.17236	Msn4	FRE4	1.07758	Fkh2	KRR1	1.96714	Sut1	ARG4	-1.94088
Phd1	ADH1	-1.1	Pdr3	ECM8	-2.19731	Msn4	CSR2	1.07588	Fkh2	TRP2	1.93507	Sut1	NDI1	-1.97746
Phd1	GRE2	-1.1	Pdr3	GAL7	-2.23598	Msn4	YGL039W	1.06192	Fkh2	FAF1	1.92308	Sut1	EDS1	-1.99929
Phd1	HMO1	-1.1	Pdr3	MAG1	-2.23858	Msn4	PRM7	1.04946	Fkh2	DIM1	1.89852	Sut1	ROQ1	-2.02396
Phd1	RPE1	-1.1	Pdr3	IMA3	-2.36577	Msn4	SAM1	1.04649	Fkh2	REX4	1.89364	Sut1	KNH1	-2.04349
Phd1	RPL42b	-1.2	Pdr3	IMA4	-2.36577	Msn4	ISU1	1.046	Fkh2	ADH6	1.89188	Sut1	SDH2	-2.05034
Phd1	SCW4	-1.3	Pdr3	PUG1	-2.43784	Msn4	LYS20	1.04454	Fkh2	DSE1	1.85522	Sut1	ICT1	-2.05137
Phd1	TIM10	-1.3	Pdr3	HSP26	-2.46302	Msn4	ACC1	1.00898	Fkh2	BUD4	1.82637	Sut1	VHS3	-2.05302
Phd1	RPS30a	-1.3	Pdr3	HXT9	-2.49769	Msn4	DIA1	-1.03054	Fkh2	TAH18	1.78962	Sut1	ATP15	-2.07681
Phd1	RPL29	-1.4	Pdr3	TPO4	-2.63767	Msn4	ENO1	-1.04836	Fkh2	MAK16	1.77837	Sut1	ATP7	-2.0914
Phd1	RPL42a	-1.4	Pdr3	CMK2	-2.94594	Msn4	ERP2	-1.05905	Fkh2	DIF1	1.7634	Sut1	PRX1	-2.10065
Phd1	YFR035C	-1.5	Pdr3	YET2	-3.23828	Msn4	MET3	-1.07359	Fkh2	IPI3	1.75193	Sut1	DDR48	-2.1154
Phd1	PTR2	-1.6	Pdr3	DOG1	-3.42831	Msn4	YNL134C	-1.08257	Fkh2	RNT1	1.7338	Sut1	SED1	-2.12371
Phd1	TIP1	-1.7	Pdr3	TDH1	-4.49929	Msn4	STI1	-1.1217	Fkh2	UME6	1.72276	Sut1	ZAP1	-2.13883
Phd1	RPS30b	-1.7	Pdr3	INO1	-5.46854	Msn4	YRO2	-1.14542	Fkh2	CLB4	1.68171	Sut1	HSP31	-2.15838
Phd1	THI73	-2	Cup9	VAC17	1.98186	Msn4	CPR1	-1.18051	Fkh2	AAH1	1.68132	Sut1	TPH3	-2.24084
Opi1	HXK1	4.0661	Cup9	SUR7	1.92545	Msn4	YDR210W	-1.18581	Fkh2	AIM20	1.66874	Sut1	PAL2	-2.24365
Opi1	CAR2	3.83668	Cup9	FTR1	1.88254	Msn4	CMK2	-1.18989	Fkh2	RRS1	1.66669	Sut1	YKL091C	-2.24887
Opi1	NDE1	2.76482	Cup9	GIC2	1.86717	Msn4	PCL1	-1.19431	Fkh2	FLO11	1.64951	Sut1	ACB1	-2.25618
Opi1	GPH1	2.73723	Cup9	ADE17	1.8506	Msn4	CCP1	-1.20425	Fkh2	FPR4	1.63587	Sut1	PCL7	-2.2613
Opi1	MET6	2.59598	Cup9	BAR1	1.81272	Msn4	YDC1	-1.20785	Fkh2	ALK1	1.59826	Sut1	MHO1	-2.3715
Opi1	CWP1	2.58596	Cup9	YNL058C	1.80554	Msn4	SSA1	-1.25711	Fkh2	UTP15	1.57376	Sut1	BAG7	-2.38972
Opi1	IDP2	2.28401	Cup9	FYV5	1.74673	Msn4	GRX1	-1.26428	Fkh2	SPL2	1.56371	Sut1	SNO3	-2.39074
Opi1	RTN2	2.263	Cup9	KRR1	1.71853	Msn4	ERO1	-1.2743	Fkh2	SYO1	1.5266	Sut1	DSE1	-2.49819
Opi1	SPR1	2.26218	Cup9	PIR3	1.61129	Msn4	SPG3	-1.28159	Fkh2	BRX1	1.51697	Sut1	AIM17	-2.50298
Opi1	FUS1	2.25925	Cup9	THR4	1.60707	Msn4	OST2	-1.28758	Fkh2	ERG8	1.50853	Sut1	ASG7	-2.52149
Opi1	FLO11	2.24748	Cup9	NFS1	1.58413	Msn4	HUR1	-1.32242	Fkh2	CLB2	1.46544	Sut1	ARI1	-2.52168
Opi1	ALD6	2.07586	Cup9	YHR033W	1.50866	Msn4	YEF1	-1.34757	Fkh2	CHS2	1.44875	Sut1	PDR15	-2.52332
Opi1	SIT1	2.07189	Cup9	SHM2	1.47658	Msn4	ULI1	-1.3633	Fkh2	URK1	1.43712	Sut1	YLR152C	-2.52511
Opi1	GAD1	2.07181	Cup9	YOL019W	1.45881	Msn4	YBR085C-A	-1.39583	Fkh2	ENP2	1.43508	Sut1	THI72	-2.53749
Opi1	PDH1	2.03104	Cup9	ILV6	1.45074	Msn4	HSC82	-1.39837	Fkh2	YTM1	1.42659	Sut1	TPS2	-2.59005
Opi1	CRC1	2.02081	Cup9	YCR016W	1.42327	Msn4	CWP2	-1.4847	Fkh2	SKP2	1.42639	Sut1	SUL2	-2.63951
Opi1	MMP1	1.99114	Cup9	FIT2	1.36488	Msn4	HCH1	-1.49822	Fkh2	IQG1	1.38679	Sut1	DOT6	-2.66497
Opi1	FIT3	1.94419	Cup9	OPT2	1.35202	Msn4	YIP3	-1.51478	Fkh2	RRP9	1.38092	Sut1	ICL2	-2.67842
Opi1	MEP2	1.90843	Cup9	ERG4	1.34246	Msn4	HAC1	-1.52212	Fkh2	RPS6A	1.37396	Sut1	COX20	-2.69193
Opi1	HXT4	1.82192	Cup9	PIR1	1.33337	Msn4	GRE3	-1.55081	Fkh2	MAK5	1.37134	Sut1	OM14	-2.71149
Opi1	KNH1	1.81083	Cup9	FCY2	1.31422	Msn4	YGP1	-1.55263	Fkh2	DRS1	1.37011	Sut1	SDP1	-2.72637
Opi1	EMI2	1.79446	Cup9	EXG1	1.31131	Msn4	PET18	-1.66293	Fkh2	ERB1	1.36821	Sut1	YGR066C	-2.73055
Opi1	VHT1	1.76496	Cup9	BAT1	1.29344	Msn4	THI20	-1.69995	Fkh2	ATC1	1.36657	Sut1	POR1	-2.88319
Opi1	MDH1	1.73255	Cup9	SUN4	1.28934	Msn4	UBX6	-1.71836	Fkh2	ROK1	1.35573	Sut1	YOL131W	-2.88439
Opi1	AGX1	1.73115	Cup9	HXT2	1.28836	Msn4	YDL124W	-1.77735	Fkh2	RPA34	1.34648	Sut1	YGP1	-2.9167
Opi1	MET10	1.72147	Cup9	HTA2	1.28564	Msn4	HSP82	-1.90978	Fkh2	RRP7	1.32596	Sut1	ATG39	-2.92201
Opi1	YGL081W	1.66129	Cup9	FAF1	1.27847	Msn4	THI4	-1.91479	Fkh2	YML119W	1.32457	Sut1	YLR177W	-2.94802
Opi1	HXT5	1.66037	Cup9	PAT1	1.27424	Msn4	TDH1	-2.01056	Fkh2	UTP13	1.31398	Sut1	ATO2	-2.97507
Opi1	HVG1	1.63034	Cup9	SIM1	1.237	Msn4	DOG1	-2.01497	Fkh2	DBP3	1.30264	Sut1	YNR014W	-2.98454
Opi1	IZH4	1.5654	Cup9	SED1	1.22986	Msn4	CPR6	-2.12537	Fkh2	HAS1	1.30082	Sut1	PMA2	-2.99811
Opi1	BIO2	1.54054	Cup9	ISU2	1.22973	Msn4	OPI3	-2.25652	Fkh2	UTP23	1.29887	Sut1	YPL247C	-3.02302
Opi1	PDR10	1.53093	Cup9	GAS3	1.19347	Msn4	HSP26	-2.62189	Fkh2	DIP2	1.29687	Sut1	MSN4	-3.02979
Opi1	FAA2	1.52261	Cup9	PET9	1.17528	Msn4	KAR2	-3.0319	Fkh2	CDC21	1.28721	Sut1	SIL1	-3.09068
Opi1	PET9	1.50205	Cup9	LYP1	1.16188	Msn4	INO1	-3.31536	Fkh2	KIP2	1.27077	Sut1	YNL194C	-3.11474
Opi1	RRT6	1.49467	Cup9	MET17	1.15129	Rpn4	FIT1	3.54322	Fkh2	FRK1	1.24417	Sut1	YMR315W	-3.14378
Opi1	MUP3	1.40641	Cup9	HHF1	1.15001	Rpn4	MPC3	3.40387	Fkh2	PWP1	1.24346	Sut1	SPI1	-3.14885
Opi1	YMR144W	1.39224	Cup9	PRY2	1.14397	Rpn4	PHO89	3.17004	Fkh2	RPS1B	1.2384	Sut1	YNL234W	-3.21543
Opi1	GOR1	1.30836	Cup9	YIH1	1.13868	Rpn4	PIR3	3.10377	Fkh2	NOP4	1.23681	Sut1	ADD37	-3.21923
Opi1	YLR460C	1.29974	Cup9	ZPR1	1.13332	Rpn4	FET3	2.99952	Fkh2	NBA1	1.22526	Sut1	GOR1	-3.26224
Opi1	SAM3	1.28073	Cup9	HHT1	1.12469	Rpn4	IMD2	2.97342	Fkh2	ARD1	1.22464	Sut1	MET3	-3.36255
Opi1	ZPS1	1.27717	Cup9	YIL169C	1.12021	Rpn4	SRX1	2.68275	Fkh2	RRB1	1.21278	Sut1	GSC2	-3.43922
Opi1	FRE2	1.25445	Cup9	UTP14	1.11432	Rpn4	BAR1	2.63623	Fkh2	ARO7	1.20761	Sut1	YRO2	-3.58986
Opi1	HBT1	1.2189	Cup9	NIP7	1.10542	Rpn4	HXK1	2.48102	Fkh2	RPA49	1.20476	Sut1	TMA10	-3.59065
Opi1	ETR1	1.21784	Cup9	UTP11	1.09268	Rpn4	CWP1	2.42295	Fkh2	ETT1	1.2022	Sut1	DOG2	-3.65045
Opi1	CUR1	1.14534	Cup9	EGT2	1.08817	Rpn4	STE2	2.3834	Fkh2	CTS1	1.20027	Sut1	ADR1	-3.6992
Opi1	PGS1	1.13256	Cup9	NOP4	1.08397	Rpn4	MTH1	2.37933	Fkh2	ODC1	1.19689	Sut1	SGA1	-3.70012
Opi1	YLR049C	1.1035	Cup9	GAS5	1.08039	Rpn4	FIT3	2.24073	Fkh2	RPA135	1.19583	Sut1	USV1	-4.01341
Opi1	TSA2	1.07825	Cup9	MAK21	1.07634	Rpn4	NDE1	2.14285	Fkh2	NSR1	1.18245	Sut1	GPX1	-4.15421
Opi1	GUT1	1.03995	Cup9	STE2	1.07531	Rpn4	PHO84	2.07316	Fkh2	RPL13B	1.17014	Sut1	GTO3	-4.20189
Opi1	TIS11	1.00793	Cup9	IXR1	1.05183	Rpn4	FRE2	2.05769	Fkh2	RPS1A	1.15413	Sut1	PHM7	-4.24209
Opi1	MET13	1.00452	Cup9	FCF2	1.04416	Rpn4	ARN2	2.05732	Fkh2	MAK11	1.12546	Sut1	POX1	-4.25139
Opi1	TFS1	1.00446	Cup9	CUP9	1.02708	Rpn4	CIT1	1.987	Fkh2	RBG1	1.122	Sut1	SNZ2	-4.25341
Opi1	ERG11	-1	Cup9	ESF1	1.02175	Rpn4	ATG39	1.88837	Fkh2	TOS4	1.10246	Sut1	COX5B	-4.4085
Opi1	ERO1	-1	Cup9	CIR1	1.01912	Rpn4	FMP45	1.81196	Fkh2	CYK3	1.09479	Sut1	SNZ3	-4.45344
Opi1	TPM1	-1	Cup9	ALB1	1.01638	Rpn4	FUS1	1.79891	Fkh2	PRS1	1.08808	Sut1	INO1	-4.52025
Opi1	OPI1	-1	Cup9	LTV1	1.01622	Rpn4	VID24	1.76024	Fkh2	NOP2	1.07819	Sut1	YNL134C	-4.58868
Opi1	PHD1	-1	Cup9	YJL017W	-1.06025	Rpn4	HXT3	1.75663	Fkh2	NUC1	1.06278	Sut1	GCY1	-4.63904
Opi1	GPX2	-1.1	Cup9	HRI1	-1.06666	Rpn4	KAR4	1.74508	Fkh2	MRT4	1.06165	Sut1	FMP33	-4.69495
Opi1	ERG20	-1.1	Cup9	YPL247C	-1.0667	Rpn4	FRE1	1.70638	Fkh2	TSR2	1.02944	Sut1	YLR149C	-4.85101
Opi1	UBX6	-1.1	Cup9	GPX2	-1.07798	Rpn4	SNZ1	1.68943	Fkh2	RPF2	1.02775	Sut1	GPG1	-4.94494
Opi1	MIX23	-1.1	Cup9	ATG20	-1.08627	Rpn4	RGI1	1.68478	Fkh2	KRE33	1.02443	Sut1	RTC3	-4.96257
Opi1	PCL1	-1.2	Cup9	AUS1	-1.09386	Rpn4	SST2	1.62964	Fkh2	SWI5	1.01955	Sut1	PGM2	-4.96377
Opi1	SCS7	-1.2	Cup9	BNA4	-1.09724	Rpn4	HXT4	1.62838	Fkh2	NSA1	1.00335	Sut1	DCS2	-5.14544
Opi1	MTD1	-1.2	Cup9	SNX4	-1.10841	Rpn4	PRM1	1.61164	Fkh2	NMT1	-1.04107	Sut1	HSP26	-5.19809
Opi1	INO4	-1.2	Cup9	DAL5	-1.12099	Rpn4	SPG4	1.60477	Fkh2	PRM4	-1.04452	Sut1	YOR289W	-5.30139
Opi1	DOG1	-1.3	Cup9	SAG1	-1.12476	Rpn4	FUS3	1.60476	Fkh2	MRPL9	-1.07059	Sut1	PDC5	-5.34159
Opi1	HSP10	-1.3	Cup9	ENO2	-1.13246	Rpn4	HPF1	1.5825	Fkh2	DOT5	-1.09176	Sut1	YDL124W	-5.3542
Opi1	TSA1	-1.3	Cup9	NRT1	-1.17018	Rpn4	INA1	1.56478	Fkh2	SEC12	-1.12398	Sut1	STF1	-5.6076
Opi1	HNM1	-1.4	Cup9	ROD1	-1.17157	Rpn4	YIL169C	1.5256	Fkh2	MSB2	-1.14586	Sut1	TSL1	-5.88056
Opi1	MCD4	-1.4	Cup9	YPI1	-1.17685	Rpn4	PST1	1.51517	Fkh2	MIC27	-1.23625	Sut1	XBP1	-6.2289
Opi1	SIL1	-1.4	Cup9	PGM2	-1.18244	Rpn4	YPK2	1.51052	Fkh2	OPY1	-1.23653	Sut1	ULI1	-6.38584
Opi1	CWP2	-1.5	Cup9	YBR241C	-1.18427	Rpn4	FIT2	1.44715	Fkh2	CBP3	-1.30891	Sut1	IGD1	-6.51354
Opi1	PMA1	-1.7	Cup9	YLR046C	-1.1876	Rpn4	YDR089W	1.41897	Fkh2	QCR10	-1.35287	Sut1	HSP12	-8.03477
Opi1	RPS9a	-1.7	Cup9	PXA1	-1.19685	Rpn4	HXT5	1.38998	Fkh2	YPL162C	-1.35534	Fyv5	ATG9	-1.61514
Opi1	YIP3	-1.7	Cup9	TMN2	-1.25552	Rpn4	ARN1	1.38949	Fkh2	BFR1	-1.38389	Fyv5	ATG8	-1.75203
Opi1	HAC1	-1.8	Cup9	DUR3	-1.35325	Rpn4	MAL33	1.38619	Fkh2	SEC63	-1.49113	Fyv5	ATG14	-2.0212
Opi1	YGP1	-2	Cup9	AIM7	-1.36713	Rpn4	ALD6	1.37767	Fkh2	TYE7	-1.55699	Fyv5	ATG32	-2.13101
Opi1	HSP26	-3.8	Cup9	GUT1	-1.38086	Rpn4	PLB2	1.35695	Fkh2	GTO3	-1.62141	Fkh1	BSC1	6.62373
Rsf2	MND1	3.87797	Cup9	THI72	-1.43753	Rpn4	ADE2	1.35061	Fkh2	YPR003C	-1.62898	Fkh1	PRM7	5.85006
Rsf2	MEI5	3.54109	Cup9	RIM11	-1.45853	Rpn4	GUT2	1.33564	Fkh2	CRG1	-1.63959	Fkh1	FLO11	5.67732
Rsf2	SLZ1	2.9316	Cup9	ACB1	-1.55137	Rpn4	JEN1	1.32918	Fkh2	MRPL35	-1.69535	Fkh1	SUN4	3.28777
Rsf2	NDE1	2.76482	Cup9	TDH2	-1.58494	Rpn4	GDH2	1.32874	Fkh2	CYC2	-1.77144	Fkh1	CDC6	2.84335
Rsf2	YBR285W	2.67983	Cup9	TIR4	-1.61742	Rpn4	RPN4	1.29459	Fkh2	PNC1	-1.91105	Fkh1	VAC17	2.50296
Rsf2	MEK1	2.65422	Cup9	ADY3	-1.68296	Rpn4	CCC2	1.29009	Fkh2	SPO19	-2.0166	Fkh1	YGK1	2.49655
Rsf2	ACH1	2.56891	Cup9	PMT3	-1.70844	Rpn4	MSN4	1.28925	Fkh2	DDR48	-2.02763	Fkh1	UTP6	2.37161
Rsf2	HXT14	2.47035	Cup9	GAS2	-1.77073	Rpn4	HXT1	1.27356	Fkh2	COQ6	-2.19116	Fkh1	OPT2	2.28963
Rsf2	SPO13	2.2421	Cup9	YLR030W	-1.7729	Rpn4	TKL2	1.23836	Fkh2	YNL234W	-2.26005	Fkh1	SGO1	2.20563
Rsf2	HOP1	2.24135	Cup9	SPO13	-1.86849	Rpn4	BTN2	1.23363	Fkh2	YPS6	-2.53288	Fkh1	AIM20	2.19667
Rsf2	YPR078C	2.24134	Cup9	YDR210W	-1.89533	Rpn4	HBT1	1.23118	Fkh2	SPS4	-2.71124	Fkh1	RPS14A	2.15525
Rsf2	SPS22	2.21699	Cup9	ADH5	-2.0608	Rpn4	ADE4	1.22962	Fkh2	ERO1	-2.99499	Fkh1	ADE17	2.14676
Rsf2	DMC1	2.17295	Cup9	ENO1	-2.4486	Rpn4	FCY2	1.21595	Fkh2	HSP31	-3.35387	Fkh1	RPA43	2.14072
Rsf2	ALD6	2.07586	Cup9	HES1	-3.07374	Rpn4	CAT8	1.20455	Fkh2	FMP33	-3.56288	Fkh1	FAA3	2.13825
Rsf2	GUT2	1.99273	Cup9	STE3	-3.19711	Rpn4	GPA1	1.20084	Met28	ENB1	11.4248	Fkh1	YNL058C	2.11861
Rsf2	REC114	1.99209	Cup9	TDH1	-4.49929	Rpn4	PUT1	1.17544	Met28	UIP3	10.5842	Fkh1	SNU13	2.08906
Rsf2	YKL107W	1.95492	Ixr1	GCV2	3.36818	Rpn4	ACO1	1.1585	Met28	YIR020C	8.70221	Fkh1	YML131W	2.06673
Rsf2	FIT3	1.94419	Ixr1	FIT3	2.34646	Rpn4	CTS1	1.13447	Met28	YOR142W-B	8.51538	Fkh1	FKH1	2.05841
Rsf2	MAL32	1.77407	Ixr1	HSP12	2.23472	Rpn4	AQR1	1.13053	Met28	PAU13	7.4098	Fkh1	ELO2	2.04739
Rsf2	FET3	1.75393	Ixr1	FIT1	2.20538	Rpn4	QDR2	1.09998	Met28	BSC1	6.77531	Fkh1	YOR342C	2.03913
Rsf2	DAK2	1.60216	Ixr1	SER3	1.94507	Rpn4	SNQ2	1.09803	Met28	ZRT1	5.94064	Fkh1	BUD3	2.02361
Rsf2	CIT1	1.56883	Ixr1	HIS4	1.86943	Rpn4	MAE1	1.07855	Met28	YDL241W	5.85532	Fkh1	RPL9A	1.97168
Rsf2	MSH5	1.56547	Ixr1	MUP1	1.8239	Rpn4	MIX17	1.06887	Met28	ARG1	5.34339	Fkh1	RPL30	1.86311
Rsf2	SSA3	1.54747	Ixr1	YNL058C	1.80554	Rpn4	YGL039W	1.06192	Met28	SNZ1	5.30763	Fkh1	BUD4	1.85768
Rsf2	HEF3	1.53799	Ixr1	IRC7	1.76016	Rpn4	PRM7	1.04946	Met28	CUP1-1	5.23716	Fkh1	DIP5	1.85759
Rsf2	QDR2	1.52945	Ixr1	YCR051W	1.73803	Rpn4	SAM1	1.04649	Met28	CUP1-2	5.23716	Fkh1	RFU1	1.85144
Rsf2	CLD1	1.52833	Ixr1	GDH1	1.71052	Rpn4	ACC1	1.00898	Met28	OPT2	5.14696	Fkh1	FTR1	1.84194
Rsf2	FMP48	1.52329	Ixr1	TUP1	1.6176	Rpn4	PRY2	-1.02894	Met28	GDH2	5.1077	Fkh1	RPA34	1.82916
Rsf2	PET9	1.50205	Ixr1	PIR3	1.61129	Rpn4	PRE6	-1.04792	Met28	ARO9	5.05701	Fkh1	FRE1	1.81924
Rsf2	HOF1	1.43341	Ixr1	DIP5	1.58794	Rpn4	ERP2	-1.05905	Met28	DUR1,2	4.94797	Fkh1	UTP4	1.81259
Rsf2	YJL045W	1.42118	Ixr1	NFS1	1.58413	Rpn4	APA1	-1.08116	Met28	CRC1	4.91993	Fkh1	RPL12A	1.80274
Rsf2	YMR144W	1.39224	Ixr1	BAP3	1.58122	Rpn4	AHA1	-1.12627	Met28	AQY2	4.57041	Fkh1	SIT1	1.78029
Rsf2	YKR005C	1.38263	Ixr1	PHO87	1.52397	Rpn4	YRO2	-1.14542	Met28	FIT2	4.54155	Fkh1	FUR1	1.76169
Rsf2	MAL33	1.37544	Ixr1	AQR1	1.51102	Rpn4	PMI40	-1.18044	Met28	YAL065C	4.45625	Fkh1	BRX1	1.75756
Rsf2	GTO3	1.35436	Ixr1	MIG1	1.50699	Rpn4	CPR1	-1.18051	Met28	IRC7	4.43051	Fkh1	ERG6	1.75713
Rsf2	YKL050C	1.30256	Ixr1	PUT4	1.49839	Rpn4	CMK2	-1.18989	Met28	ATG41	4.26413	Fkh1	RPS9A	1.72792
Rsf2	AIM17	1.29649	Ixr1	MUP3	1.48603	Rpn4	YPL034W	-1.19148	Met28	CAR1	4.1814	Fkh1	GAS3	1.71738
Rsf2	PHR1	1.25778	Ixr1	RRP43	1.46049	Rpn4	YDC1	-1.20785	Met28	CPA2	4.15556	Fkh1	SER3	1.71649
Rsf2	CHS2	1.23661	Ixr1	ILV6	1.45074	Rpn4	SEM1	-1.22704	Met28	ARG3	3.94583	Fkh1	UTP9	1.70546
Rsf2	SPH1	1.1703	Ixr1	ARN2	1.4194	Rpn4	MCD4	-1.24747	Met28	ASN1	3.91887	Fkh1	FPR4	1.69326
Rsf2	PGS1	1.13256	Ixr1	ILV2	1.41487	Rpn4	MAG1	-1.24806	Met28	SPO13	3.90325	Fkh1	ADE2	1.69051
Rsf2	BAP3	1.11751	Ixr1	LEU9	1.37911	Rpn4	SSA1	-1.25711	Met28	LEU9	3.82995	Fkh1	RPS12	1.67166
Rsf2	ATG9	1.10779	Ixr1	ASN1	1.35508	Rpn4	ERO1	-1.2743	Met28	NRM1	3.7943	Fkh1	RPB5	1.67056
Rsf2	GUT1	1.03995	Ixr1	OPT2	1.35202	Rpn4	OST2	-1.28758	Met28	SIT1	3.78996	Fkh1	HAS1	1.66753
Rsf2	RSF2	1.01103	Ixr1	CTT1	1.34545	Rpn4	PDI1	-1.38096	Met28	TEA1	3.78866	Fkh1	YDR042C	1.64791
Rsf2	ARE1	1.0042	Ixr1	ERG4	1.34246	Rpn4	MPD1	-1.46542	Met28	DSE4	3.76451	Fkh1	NRM1	1.64356
Rsf2	VPS29	-1.1	Ixr1	CDC50	1.33572	Rpn4	CWP2	-1.4847	Met28	CTR3	3.72192	Fkh1	SLK19	1.64227
Rsf2	PCL1	-1.2	Ixr1	PIR1	1.33337	Rpn4	EHT1	-1.48903	Met28	CAR2	3.71385	Fkh1	RPS21A	1.63153
Rsf2	EFB1	-1.2	Ixr1	CLB1	1.31322	Rpn4	TSA1	-1.54298	Met28	MEP2	3.56671	Fkh1	URA3	1.62884
Rsf2	DOG1	-1.3	Ixr1	EXG1	1.31131	Rpn4	GRE3	-1.55081	Met28	LYS20	3.55796	Fkh1	RPL7A	1.62705
Rsf2	OYE2	-1.5	Ixr1	BAT1	1.29344	Rpn4	YGP1	-1.55263	Met28	CIT2	3.52683	Fkh1	NIP7	1.62485
Rsf2	PMA1	-1.7	Ixr1	HXT2	1.28836	Rpn4	UBX6	-1.71836	Met28	FLO5	3.49313	Fkh1	ALB1	1.61955
Rsf2	THI20	-2.2	Ixr1	CSI2	1.27358	Rpn4	YDL124W	-1.77735	Met28	ZPS1	3.45502	Fkh1	MYO1	1.61465
Adr1	POT1	4.48216	Ixr1	SIM1	1.237	Rpn4	HSP82	-1.90978	Met28	SSU1	3.42562	Fkh1	CHS2	1.60547
Adr1	RGI2	4.26624	Ixr1	SED1	1.22986	Rpn4	TDH1	-2.01056	Met28	YHI9	3.42032	Fkh1	RKI1	1.59828
Adr1	HXK1	4.0661	Ixr1	AIM20	1.22543	Rpn4	OPI3	-2.25652	Met28	PXP2	3.40447	Fkh1	RPL37A	1.59534
Adr1	ADY2	3.93125	Ixr1	SAM3	1.21353	Rpn4	HSP26	-2.62189	Met28	SPO16	3.32715	Fkh1	RPL7B	1.59447
Adr1	CAR2	3.83668	Ixr1	YCR043C	1.18269	Rpn4	KAR2	-3.0319	Met28	ALD5	3.27853	Fkh1	EGT2	1.59068
Adr1	HXT2	3.69306	Ixr1	PHO90	1.18076	Rpn4	INO1	-3.31536	Met28	TRP4	3.24706	Fkh1	RPL14A	1.58939
Adr1	YIG1	3.43714	Ixr1	PET9	1.17528	Rpn4	MIG1	-4.39166	Met28	HIS4	3.22209	Fkh1	RPL28	1.58334
Adr1	PIR3	3.36425	Ixr1	LYP1	1.16188	Mal33	PHO89	3.17004	Met28	YLL053C	3.2192	Fkh1	RRP8	1.57858
Adr1	IMD2	3.28626	Ixr1	IZH1	1.15726	Mal33	CTR3	3.09977	Met28	YNL284C-B	3.12331	Fkh1	RPS18A	1.57671
Adr1	SLZ1	2.9316	Ixr1	BUD31	1.15333	Mal33	IMD2	2.97342	Met28	YER085C	3.0989	Fkh1	RPS20	1.57291
Adr1	GCV2	2.91239	Ixr1	HHF1	1.15001	Mal33	BAR1	2.63623	Met28	FLO9	3.08141	Fkh1	RLP24	1.56826
Adr1	MPC3	2.87361	Ixr1	PRY2	1.14397	Mal33	HXT2	2.4797	Met28	RNP1	3.07073	Fkh1	RSA3	1.56657
Adr1	ICL1	2.81515	Ixr1	MDN1	1.14394	Mal33	CWP1	2.42295	Met28	AGP1	3.0569	Fkh1	ECT1	1.56512
Adr1	FOX2	2.64651	Ixr1	ILV3	1.13012	Mal33	STE2	2.3834	Met28	RAD53	3.03359	Fkh1	MRT4	1.56476
Adr1	ALP1	2.50371	Ixr1	YIL169C	1.12021	Mal33	FIT3	2.24073	Met28	SGO1	3.00234	Fkh1	RPS15	1.55282
Adr1	BOP2	2.49758	Ixr1	PGD1	1.117	Mal33	CAR2	2.17885	Met28	DSE2	2.97977	Fkh1	BAT2	1.55026
Adr1	ALD4	2.4654	Ixr1	NSA1	1.10283	Mal33	SNZ1	1.68943	Met28	FCY2	2.90778	Fkh1	DBP3	1.54958
Adr1	ICL2	2.4449	Ixr1	HCM1	1.09602	Mal33	SST2	1.62964	Met28	RSA4	2.90487	Fkh1	TIP1	1.54527
Adr1	GSY1	2.3926	Ixr1	UTP11	1.09268	Mal33	CYC3	1.55653	Met28	BNA4	2.87609	Fkh1	IQG1	1.54238
Adr1	SUE1	2.35977	Ixr1	NOP4	1.08397	Mal33	VBA5	1.48479	Met28	SCW11	2.87184	Fkh1	SAM4	1.53767
Adr1	IDP2	2.28401	Ixr1	PTC6	1.07807	Mal33	FIT2	1.44715	Met28	YLR460C	2.86716	Fkh1	GDH2	1.5361
Adr1	SPO11	2.24817	Ixr1	STE2	1.07531	Mal33	MAL33	1.38619	Met28	MAE1	2.85642	Fkh1	RPP0	1.53596
Adr1	CAT2	2.19537	Ixr1	CTP1	1.07189	Mal33	MSN4	1.28925	Met28	LYS1	2.79086	Fkh1	ESF2	1.52979
Adr1	PXA2	2.18992	Ixr1	NOP7	1.06613	Mal33	HXT1	1.27356	Met28	IRC8	2.78149	Fkh1	CMS1	1.52913
Adr1	DMC1	2.17295	Ixr1	GTT1	1.06101	Mal33	CLB1	1.24933	Met28	ARG5,6	2.77556	Fkh1	RPL5	1.52503
Adr1	GND2	2.13316	Ixr1	NOP2	1.05621	Mal33	PUT1	1.17544	Met28	DAL7	2.7741	Fkh1	RPL27A	1.52109
Adr1	POX1	2.08204	Ixr1	IXR1	1.05183	Mal33	QDR2	1.09998	Met28	ANB1	2.75822	Fkh1	RPS22A	1.51538
Adr1	ALD6	2.07586	Ixr1	FCF2	1.04416	Mal33	MAE1	1.07855	Met28	YPL080C	2.74557	Fkh1	YBL028C	1.51422
Adr1	PMA2	2.07485	Ixr1	BMS1	1.04155	Mal33	ADE13	1.07159	Met28	KIN3	2.71356	Fkh1	RPS19A	1.49672
Adr1	PDH1	2.03104	Ixr1	NMD3	1.02744	Mal33	PRY2	-1.02894	Met28	DAL3	2.6845	Fkh1	RPL2B	1.49341
Adr1	CRC1	2.02081	Ixr1	CUP9	1.02708	Mal33	VPH2	-1.07278	Met28	PUT1	2.68427	Fkh1	RPL20A	1.4865
Adr1	DCI1	2.0136	Ixr1	CIR1	1.01912	Mal33	ERG20	-1.12231	Met28	SUN4	2.66145	Fkh1	RPL6A	1.47714
Adr1	GUT2	1.99273	Ixr1	ALD4	1.0136	Mal33	PMT3	-1.18132	Met28	HIS3	2.65731	Fkh1	STM1	1.47375
Adr1	PHO5	1.96325	Ixr1	PRP5	1.01344	Mal33	PCL1	-1.19431	Met28	FUR4	2.64541	Fkh1	RPS17A	1.47204
Adr1	YKR075C	1.93223	Ixr1	SAM1	1.01221	Mal33	HSC82	-1.39837	Met28	YCR087C-A	2.6384	Fkh1	RPS13	1.47156
Adr1	PXA1	1.86629	Ixr1	YTM1	1.01088	Mal33	HSP82	-1.90978	Met28	VBA1	2.6325	Fkh1	HPT1	1.4693
Adr1	YCR050C	1.85619	Ixr1	RSA1	1.00343	Kar4	MPC3	3.40387	Met28	SRB8	2.62244	Fkh1	RPS21B	1.45066
Adr1	FAT3	1.82453	Ixr1	COS1	-1.00099	Kar4	FET3	2.99952	Met28	ACO2	2.61725	Fkh1	RPL24A	1.44973
Adr1	ACS1	1.80831	Ixr1	KKQ8	-1.0107	Kar4	SRX1	2.68275	Met28	ACS1	2.61314	Fkh1	NOP58	1.44742
Adr1	YER085C	1.78308	Ixr1	HEF3	-1.01666	Kar4	BAR1	2.63623	Met28	RIB5	2.60326	Fkh1	RPS6B	1.44166
Adr1	JEN1	1.78117	Ixr1	IML2	-1.01705	Kar4	IZH4	2.53436	Met28	YMC2	2.60023	Fkh1	RPS19B	1.44083
Adr1	AGP2	1.7193	Ixr1	INP2	-1.01711	Kar4	HXK1	2.48102	Met28	BUD3	2.593	Fkh1	RPL23A	1.4383
Adr1	YMR018W	1.71669	Ixr1	URA8	-1.01975	Kar4	CWP1	2.42295	Met28	PLB2	2.59038	Fkh1	GUA1	1.43604
Adr1	ANT1	1.69334	Ixr1	YGP1	-1.02954	Kar4	STE2	2.3834	Met28	ART5	2.58227	Fkh1	RPL38	1.43426
Adr1	PDC5	1.68905	Ixr1	COX11	-1.03148	Kar4	ZNF1	2.18733	Met28	SUT2	2.58218	Fkh1	RPS9B	1.42084
Adr1	YNL195C	1.65691	Ixr1	VPS8	-1.04583	Kar4	PHO84	2.07316	Met28	DLD3	2.55343	Fkh1	RPL4A	1.41607
Adr1	ARO9	1.64746	Ixr1	YJL017W	-1.06025	Kar4	FRE2	2.05769	Met28	ILV6	2.55265	Fkh1	RPS8B	1.4122
Adr1	AMF1	1.64059	Ixr1	HRI1	-1.06666	Kar4	REG2	2.05452	Met28	ZTA1	2.53462	Fkh1	ZPR1	1.41119
Adr1	FDH1	1.60564	Ixr1	YPL247C	-1.0667	Kar4	STE6	1.95433	Met28	PEX21	2.53032	Fkh1	NOG2	1.4072
Adr1	SUL1	1.59007	Ixr1	GPX2	-1.07798	Kar4	FMP45	1.81196	Met28	PIG1	2.52732	Fkh1	RPS0A	1.40606
Adr1	YNL194C	1.57227	Ixr1	YNL011C	-1.08006	Kar4	FUS1	1.79891	Met28	FKH2	2.51793	Fkh1	RPP2B	1.40539
Adr1	IZH4	1.5654	Ixr1	YPR1	-1.08014	Kar4	CTR1	1.76111	Met28	RAD51	2.51377	Fkh1	RPS25B	1.40246
Adr1	SPS19	1.52977	Ixr1	SIA1	-1.08515	Kar4	KAR4	1.74508	Met28	CLB5	2.49643	Fkh1	RPS16A	1.40227
Adr1	FAA2	1.52261	Ixr1	LDH1	-1.08548	Kar4	OSW1	1.61566	Met28	YCR043C	2.4848	Fkh1	RLP7	1.40055
Adr1	SDH1	1.5205	Ixr1	AUS1	-1.09386	Kar4	PRM1	1.61164	Met28	ARG4	2.45844	Fkh1	RPL14B	1.39708
Adr1	LYS1	1.50894	Ixr1	PCD1	-1.10046	Kar4	SPG4	1.60477	Met28	OAC1	2.43511	Fkh1	RPL22A	1.39446
Adr1	CIT3	1.50278	Ixr1	NAS6	-1.10284	Kar4	FUS3	1.60476	Met28	TPN1	2.43456	Fkh1	CDC5	1.39371
Adr1	USV1	1.47994	Ixr1	YMR315W	-1.10538	Kar4	OPT1	1.58951	Met28	VAC17	2.41838	Fkh1	RPS17B	1.3908
Adr1	YFL054C	1.44409	Ixr1	GLO4	-1.1101	Kar4	CYC3	1.55653	Met28	HO	2.40572	Fkh1	DBP9	1.38772
Adr1	CYB2	1.42206	Ixr1	MYO3	-1.12289	Kar4	FIG1	1.52539	Met28	NAF1	2.39752	Fkh1	RPS4A	1.38518
Adr1	MUP3	1.40641	Ixr1	CMG1	-1.14559	Kar4	BOP2	1.51593	Met28	DHR2	2.39633	Fkh1	RPL43A	1.37889
Adr1	PEX11	1.38978	Ixr1	RRF1	-1.15312	Kar4	PST1	1.51517	Met28	RED1	2.38731	Fkh1	RPL8B	1.375
Adr1	SPO1	1.37374	Ixr1	LAM5	-1.16309	Kar4	YMR244W	1.48866	Met28	PHO5	2.37198	Fkh1	RPL31A	1.37124
Adr1	YPK2	1.35397	Ixr1	SNX41	-1.16326	Kar4	YJL107C	1.47295	Met28	FIT3	2.36866	Fkh1	RPL10	1.36941
Adr1	NQM1	1.35302	Ixr1	SUL2	-1.16363	Kar4	ECL1	1.41595	Met28	LYS4	2.35494	Fkh1	RPS8A	1.36792
Adr1	MDH2	1.34954	Ixr1	NRT1	-1.17018	Kar4	PYK2	1.40321	Met28	GLG2	2.35379	Fkh1	ALK1	1.36661
Adr1	TKL2	1.28956	Ixr1	YPI1	-1.17685	Kar4	ALD6	1.37767	Met28	HOM3	2.35034	Fkh1	RPL40B	1.35833
Adr1	LSC1	1.26218	Ixr1	YBR241C	-1.18427	Kar4	ADE2	1.35061	Met28	ARN2	2.3502	Fkh1	RPL26B	1.35566
Adr1	ATG15	1.25771	Ixr1	SHU2	-1.18849	Kar4	FIG2	1.33165	Met28	YHR214W	2.3426	Fkh1	RPL6B	1.35515
Adr1	IZH1	1.23929	Ixr1	SSA2	-1.20163	Kar4	NRG2	1.32975	Met28	KCC4	2.3326	Fkh1	SPC97	1.35194
Adr1	HBT1	1.2189	Ixr1	YKR011C	-1.21231	Kar4	YNL058C	1.32943	Met28	PAU12	2.31986	Fkh1	RPS5	1.35123
Adr1	ETR1	1.21784	Ixr1	YHC3	-1.21662	Kar4	ALP1	1.32284	Met28	PWP2	2.31695	Fkh1	RPS1B	1.34227
Adr1	YTP1	1.19808	Ixr1	YLR345W	-1.23515	Kar4	ISU2	1.3188	Met28	SPB1	2.31242	Fkh1	TRM82	1.3418
Adr1	BAT1	1.18462	Ixr1	YNL208W	-1.24532	Kar4	HXT1	1.27356	Met28	MET28	2.29533	Fkh1	RPS7A	1.33941
Adr1	GPT2	1.1502	Ixr1	SPO22	-1.2489	Kar4	BTN2	1.23363	Met28	YKR075C	2.29068	Fkh1	RPL15A	1.33522
Adr1	CTF19	1.12981	Ixr1	ERO1	-1.25527	Kar4	HBT1	1.23118	Met28	KTR5	2.28816	Fkh1	RPL1B	1.33442
Adr1	AGP1	1.1295	Ixr1	HNT2	-1.25983	Kar4	ADE4	1.22962	Met28	BOP2	2.28352	Fkh1	PLB2	1.32939
Adr1	ATO3	1.11143	Ixr1	RMR1	-1.26889	Kar4	FCY2	1.21595	Met28	RAD5	2.27646	Fkh1	RPL23B	1.32681
Adr1	ADR1	1.08408	Ixr1	CPS1	-1.26994	Kar4	QDR2	1.09998	Met28	RPS14A	2.27124	Fkh1	EBP2	1.31861
Adr1	YGL039W	1.06448	Ixr1	JLP1	-1.27733	Kar4	VMR1	1.09982	Met28	LYS2	2.26796	Fkh1	RPS24A	1.31777
Adr1	ATG13	1.05966	Ixr1	UBX6	-1.2795	Kar4	PRM7	1.04946	Met28	UTR2	2.25686	Fkh1	RPS18B	1.3177
Adr1	ISU1	1.05101	Ixr1	DUF1	-1.28772	Kar4	SAM1	1.04649	Met28	MCH1	2.2562	Fkh1	CLB2	1.31681
Adr1	GUT1	1.03995	Ixr1	YCR007C	-1.29267	Kar4	LYS20	1.04454	Met28	PDH1	2.2547	Fkh1	RPL34B	1.31648
Adr1	TIS11	1.00793	Ixr1	VID30	-1.29419	Kar4	PRY2	-1.02894	Met28	PCL5	2.25408	Fkh1	ALK2	1.31643
Adr1	ENO1	-1.1	Ixr1	CSM2	-1.30409	Kar4	YNL134C	-1.08257	Met28	DBP1	2.24338	Fkh1	RRB1	1.30951
Adr1	CPT1	-1.1	Ixr1	MSF1	-1.30498	Kar4	SBH2	-1.10842	Met28	REC102	2.24037	Fkh1	RPL11A	1.30382
Adr1	PDC1	-1.1	Ixr1	YGL117W	-1.31202	Kar4	EUG1	-1.15704	Met28	ALT1	2.23964	Fkh1	NSR1	1.30376
Adr1	DBP2	-1.1	Ixr1	YLR177W	-1.3268	Kar4	PCL1	-1.19431	Met28	FKH1	2.226	Fkh1	RPL13B	1.30196
Adr1	UBX6	-1.1	Ixr1	YGR161W-B	-1.33516	Kar4	ULI1	-1.3633	Met28	TRM11	2.22423	Fkh1	RPL12B	1.29952
Adr1	CDC19	-1.2	Ixr1	DUR3	-1.35325	Kar4	HSP82	-1.90978	Met28	MCH4	2.22206	Fkh1	RPS10A	1.28682
Adr1	HPT1	-1.2	Ixr1	YOR292C	-1.35715	Kar4	DOG1	-2.01497	Met28	ILV2	2.2183	Fkh1	CYK3	1.28486
Adr1	ENO2	-1.3	Ixr1	YER034W	-1.35953	Adr1	MPC3	3.40387	Met28	FLO1	2.21337	Fkh1	RPS6A	1.27669
Adr1	FSH1	-1.4	Ixr1	UBP11	-1.36486	Adr1	PIR3	3.10377	Met28	HOM2	2.20147	Fkh1	RPS3	1.27643
Adr1	PTR2	-1.6	Ixr1	UBP9	-1.37138	Adr1	IMD2	2.97342	Met28	YGL117W	2.18578	Fkh1	ELO3	1.2752
Adr1	TIP1	-1.7	Ixr1	SPR6	-1.37635	Adr1	PUT4	2.85889	Met28	KAR3	2.18361	Fkh1	NOC2	1.2733
Adr1	YRO2	-2.5	Ixr1	PUS5	-1.39724	Adr1	IZH4	2.53436	Met28	YGR039W	2.17894	Fkh1	RPP2A	1.27178
Stp2	RGI2	4.26624	Ixr1	MUM3	-1.39931	Adr1	HXK1	2.48102	Met28	YMR046C	2.17387	Fkh1	RAX2	1.26577
Stp2	HXK1	4.0661	Ixr1	URA10	-1.40108	Adr1	HXT2	2.4797	Met28	SKG6	2.167	Fkh1	RPL17A	1.26556
Stp2	CAR2	3.83668	Ixr1	LDS2	-1.40855	Adr1	CAR2	2.17885	Met28	ILV3	2.16472	Fkh1	RPP1B	1.26392
Stp2	PHO89	3.7189	Ixr1	YBR284W	-1.41977	Adr1	ECM13	2.1225	Met28	ERG2	2.1638	Fkh1	RPS31	1.26237
Stp2	PIR3	3.36425	Ixr1	TDA11	-1.42772	Adr1	PHO84	2.07316	Met28	QDR3	2.16321	Fkh1	RPL1A	1.26163
Stp2	PHO92	3.304	Ixr1	HST2	-1.43226	Adr1	RGI2	2.07215	Met28	BTN2	2.16183	Fkh1	CGR1	1.25833
Stp2	SNO1	3.03071	Ixr1	THI72	-1.43753	Adr1	YKR075C	1.8469	Met28	YDR316W-A	2.15946	Fkh1	RPS23B	1.25805
Stp2	SNZ1	2.92168	Ixr1	YPS1	-1.4422	Adr1	ADR1	1.7611	Met28	YGR161C-C	2.15946	Fkh1	RPS24B	1.25262
Stp2	GPH1	2.73723	Ixr1	THI13	-1.45296	Adr1	SPG4	1.60477	Met28	YCR051W	2.15924	Fkh1	RPL19B	1.24632
Stp2	PDC6	2.69676	Ixr1	LOH1	-1.45703	Adr1	ICL1	1.58704	Met28	SRP40	2.15686	Fkh1	RPL16B	1.24533
Stp2	MET6	2.59598	Ixr1	RIM11	-1.45853	Adr1	HPF1	1.5825	Met28	MEP1	2.15424	Fkh1	SSU72	1.24233
Stp2	CWP1	2.58596	Ixr1	YOL107W	-1.49027	Adr1	POT1	1.57288	Met28	RFU1	2.14565	Fkh1	RPS25A	1.24202
Stp2	ACH1	2.56891	Ixr1	YJL213W	-1.53139	Adr1	TDA1	1.54438	Met28	IDP1	2.14029	Fkh1	RPL31B	1.23999
Stp2	ALP1	2.50371	Ixr1	ACB1	-1.55137	Adr1	YIL169C	1.5256	Met28	SPT21	2.13755	Fkh1	RPL18A	1.23548
Stp2	HXT14	2.47035	Ixr1	GSY1	-1.55653	Adr1	BOP2	1.51593	Met28	ZDS2	2.13428	Fkh1	RPL20B	1.23389
Stp2	GSY1	2.3926	Ixr1	YHI9	-1.56372	Adr1	YPK2	1.51052	Met28	SPO11	2.13383	Fkh1	GAR1	1.23388
Stp2	AMA1	2.33276	Ixr1	TDH2	-1.58494	Adr1	YJL107C	1.47295	Met28	GAS3	2.13146	Fkh1	AAH1	1.23201
Stp2	FUS1	2.25925	Ixr1	TIR4	-1.61742	Adr1	RTS3	1.40125	Met28	SDT1	2.12919	Fkh1	NOP56	1.2318
Stp2	PXA2	2.18992	Ixr1	TSA2	-1.62251	Adr1	IDP2	1.37825	Met28	IME2	2.12544	Fkh1	RPS4B	1.23142
Stp2	ZRT1	2.1454	Ixr1	TPO2	-1.63863	Adr1	ALD6	1.37767	Met28	EGT2	2.12398	Fkh1	RPL35A	1.22817
Stp2	MET28	2.14144	Ixr1	PMC1	-1.64696	Adr1	GUT2	1.33564	Met28	YKL070W	2.11878	Fkh1	RPL4B	1.22639
Stp2	GND2	2.13316	Ixr1	YER152C	-1.65273	Adr1	JEN1	1.32918	Met28	HIS6	2.11858	Fkh1	RPL25	1.21082
Stp2	YLR149C	2.13285	Ixr1	PPM1	-1.6749	Adr1	IZH1	1.32865	Met28	RKI1	2.11556	Fkh1	NHP2	1.20744
Stp2	GAD1	2.07181	Ixr1	YDC1	-1.67747	Adr1	ALP1	1.32284	Met28	YHR020W	2.08959	Fkh1	RPS16B	1.20695
Stp2	CRC1	2.02081	Ixr1	ADY3	-1.68296	Adr1	TKL2	1.23836	Met28	YML131W	2.08908	Fkh1	RPL32	1.20586
Stp2	SGA1	1.88433	Ixr1	EST3	-1.6976	Adr1	BTN2	1.23363	Met28	AST1	2.08653	Fkh1	PRT1	1.20046
Stp2	RRT12	1.88348	Ixr1	SPO23	-1.69885	Adr1	HBT1	1.23118	Met28	ELO1	2.08607	Fkh1	RPL21B	1.18768
Stp2	PXA1	1.86629	Ixr1	ATG14	-1.7011	Adr1	FDH1	1.17067	Met28	BIO4	2.07804	Fkh1	RPL16A	1.17493
Stp2	HES1	1.85239	Ixr1	PMT3	-1.70844	Adr1	SDH1	1.13648	Met28	SCC2	2.07679	Fkh1	RPS1A	1.16734
Stp2	PTC6	1.84928	Ixr1	GDH3	-1.72567	Adr1	VMR1	1.09982	Met28	ERG3	2.07646	Fkh1	NET1	1.16474
Stp2	PHM7	1.84002	Ixr1	HOP1	-1.76542	Adr1	YGL039W	1.06192	Met28	PRR2	2.06831	Fkh1	PEX25	1.15606
Stp2	FAT3	1.82453	Ixr1	TIR1	-1.77054	Adr1	ATO3	1.04999	Met28	EFM4	2.06074	Fkh1	RPL40A	1.15155
Stp2	MUP1	1.81162	Ixr1	GAS2	-1.77073	Adr1	ISU1	1.046	Met28	HIS5	2.06004	Fkh1	MLO50	1.14655
Stp2	CRG1	1.78258	Ixr1	SCS3	-1.77811	Adr1	YFL054C	1.04139	Met28	CTP1	2.05677	Fkh1	SWI5	1.14524
Stp2	LEU2	1.75498	Ixr1	ATG31	-1.81267	Adr1	ENO1	-1.04836	Met28	LEU2	2.04424	Fkh1	RPS27B	1.14229
Stp2	YBR138C	1.73214	Ixr1	HUL4	-1.8172	Adr1	STI1	-1.1217	Met28	CAT2	2.03633	Fkh1	RPS11B	1.1271
Stp2	MET10	1.72147	Ixr1	ROG3	-1.83309	Adr1	YRO2	-1.14542	Met28	ARO4	2.02953	Fkh1	RPS2	1.12404
Stp2	AGP2	1.7193	Ixr1	ARO10	-1.84821	Adr1	YEF1	-1.34757	Met28	FUR1	2.02049	Fkh1	RPS26A	1.12311
Stp2	HXT5	1.66037	Ixr1	MET3	-1.84918	Adr1	UBX6	-1.71836	Met28	RRN7	2.01457	Fkh1	BMT6	1.12251
Stp2	ARO9	1.64746	Ixr1	HEM15	-1.8504	Adr1	HSP82	-1.90978	Met28	ADE12	2.01186	Fkh1	FAP7	1.11989
Stp2	CIT1	1.56883	Ixr1	SDD1	-1.8636	Adr1	CPR6	-2.12537	Met28	ERG6	2.01052	Fkh1	RPP1A	1.11391
Stp2	AIM39	1.55318	Ixr1	SSP1	-1.88944	Mth1	NDE1	2.14285	Met28	RPL30	2.00928	Fkh1	NIS1	1.11375
Stp2	SSA3	1.54747	Ixr1	FRE7	-1.89134	Mth1	SST2	1.62964	Met28	MYO1	2.00911	Fkh1	RPL17B	1.10815
Stp2	HEF3	1.53799	Ixr1	YDR210W	-1.89533	Mth1	HPF1	1.5825	Met28	SPC97	2.00669	Fkh1	ACL4	1.10179
Stp2	ECM4	1.50478	Ixr1	TIR3	-1.93601	Mth1	YPK2	1.51052	Met28	RBH2	2.00195	Fkh1	RPL24B	1.09972
Stp2	UGA4	1.48864	Ixr1	YHR138C	-1.96512	Mth1	AQR1	1.13053	Met28	AIM44	1.99767	Fkh1	RPS7B	1.09121
Stp2	SPO21	1.44657	Ixr1	YOR289W	-1.97532	Mth1	ISU1	1.046	Met28	UGA3	1.99506	Fkh1	ATO3	1.08868
Stp2	YPR127W	1.44008	Ixr1	MAL31	-2.02159	Mth1	HRI1	-1.0457	Met28	TOF1	1.98359	Fkh1	AIM44	1.08127
Stp2	YDR387C	1.4347	Ixr1	IMA2	-2.04734	Mth1	PRE6	-1.04792	Met28	DUG3	1.97674	Fkh1	RPL13A	1.08054
Stp2	YJL045W	1.42118	Ixr1	ADH5	-2.0608	Mth1	VPH2	-1.07278	Met28	YPL264C	1.97535	Fkh1	GCV2	1.07846
Stp2	YMR144W	1.39224	Ixr1	SRL4	-2.1524	Mth1	ERG20	-1.12231	Met28	SRO9	1.97008	Fkh1	RPS11A	1.07679
Stp2	SAF1	1.38786	Ixr1	THI12	-2.18046	Mth1	YRO2	-1.14542	Met28	PSF2	1.96964	Fkh1	RPS28B	1.06439
Stp2	XBP1	1.37748	Ixr1	ECM8	-2.19731	Mth1	CPR1	-1.18051	Met28	SPC29	1.96887	Fkh1	RPL35B	1.06405
Stp2	SPO1	1.37374	Ixr1	SMA2	-2.27915	Mth1	PCL1	-1.19431	Met28	ARE1	1.96883	Fkh1	RAD51	1.03631
Stp2	UGA1	1.35612	Ixr1	PBI2	-2.34434	Mth1	SSA1	-1.25711	Met28	TRP5	1.96863	Fkh1	LYS20	1.02891
Stp2	NQM1	1.35302	Ixr1	IMA3	-2.36577	Mth1	COQ11	-1.35693	Met28	KRR1	1.96714	Fkh1	RPS14B	1.02728
Stp2	PUT1	1.33087	Ixr1	EMP46	-2.36751				Met28	UTR4	1.96644	Fkh1	SST2	1.02044
Stp2	SRL3	1.31895	Ixr1	THI5	-2.45061				Met28	HMS2	1.96397	Fkh1	DBP6	1.02043
Stp2	PLM2	1.28305	Ixr1	TPO4	-2.63767				Met28	YVH1	1.9498	Fkh1	RPS23A	1.0202
Stp2	ZPS1	1.27717	Ixr1	HES1	-3.07374				Met28	TRP2	1.93507	Fkh1	SSB1	1.00792
Stp2	MPC54	1.26891	Ixr1	YET2	-3.23828				Met28	EMA19	1.93384	Fkh1	TIF11	1.00433
Stp2	PEX15	1.26244	Ixr1	TDH1	-4.49929				Met28	VMR1	1.92744	Fkh1	RPL37B	1.00391
Stp2	BIO3	1.25827	Swi5	GAP1	3.6212				Met28	FAF1	1.92308	Fkh1	MET5	-1.00149
Stp2	ATG15	1.25771	Swi5	FET3	2.82941				Met28	SAP185	1.91804	Fkh1	WTM1	-1.00328
Stp2	MSS11	1.25224	Swi5	CWP1	2.72084				Met28	CMR1	1.91799	Fkh1	HSP78	-1.00755
Stp2	CHS2	1.23661	Swi5	NDE1	2.52121				Met28	SSF1	1.91691	Fkh1	SRY1	-1.04471
Stp2	ETR1	1.21784	Swi5	VHT1	2.41921				Met28	MAK31	1.91161	Fkh1	QCR8	-1.05116
Stp2	BAR1	1.18308	Swi5	MET6	2.27819				Met28	SHE1	1.90998	Fkh1	RTS3	-1.06589
Stp2	MSN4	1.18011	Swi5	HSP12	2.23472				Met28	PHO11	1.90507	Fkh1	HSP104	-1.08119
Stp2	ICS2	1.17955	Swi5	OPT1	2.06882				Met28	DBP8	1.90068	Fkh1	UBX6	-1.09628
Stp2	DAL4	1.17255	Swi5	SPB1	1.97584				Met28	DIM1	1.89852	Fkh1	CYC2	-1.10206
Stp2	HHO1	1.16823	Swi5	SER3	1.94507				Met28	THR4	1.89521	Fkh1	MET6	-1.10242
Stp2	YCR062W	1.1678	Swi5	YCR087C-A	1.87761				Met28	YCP4	1.89345	Fkh1	MET2	-1.12887
Stp2	AGP1	1.1295	Swi5	GIC2	1.86717				Met28	TRF5	1.89263	Fkh1	PRC1	-1.14752
Stp2	BAP3	1.11751	Swi5	ADE17	1.8506				Met28	ADH6	1.89188	Fkh1	YAP1801	-1.14869
Stp2	STP2	1.11185	Swi5	MUP1	1.8239				Met28	YIH1	1.88248	Fkh1	PYC1	-1.14893
Stp2	DBF2	1.1059	Swi5	BAR1	1.81272				Met28	SAM3	1.87671	Fkh1	GAT1	-1.15592
Stp2	YLR049C	1.1035	Swi5	YNL058C	1.80554				Met28	STR3	1.86973	Fkh1	PHO84	-1.15715
Stp2	ADR1	1.08408	Swi5	FYV5	1.74673				Met28	MIF2	1.86689	Fkh1	GPP2	-1.17694
Stp2	LSP1	1.08263	Swi5	KRR1	1.71853				Met28	YFL066C	1.86642	Fkh1	SHR5	-1.17754
Stp2	CHS6	1.03208	Swi5	PWP2	1.71164				Met28	ARN1	1.86235	Fkh1	IMP2'	-1.18076
Stp2	DAL1	1.0162	Swi5	GDH1	1.71052				Met28	NSE4	1.85929	Fkh1	GUD1	-1.18538
Stp2	TSC10	-1	Swi5	RSA4	1.69503				Met28	BMT6	1.85699	Fkh1	HYR1	-1.18576
Stp2	GPX2	-1.1	Swi5	NCE102	1.67273				Met28	DSE1	1.85522	Fkh1	PHM6	-1.23434
Stp2	SCP1	-1.1	Swi5	BUD23	1.66875				Met28	NOP13	1.85153	Fkh1	YNL208W	-1.23796
Stp2	ERG20	-1.1	Swi5	PIR3	1.61129				Met28	ARG2	1.85116	Fkh1	RFS1	-1.23961
Stp2	HMO1	-1.1	Swi5	THR4	1.60707				Met28	FDO1	1.84694	Fkh1	GPD2	-1.24298
Stp2	PCL1	-1.2	Swi5	DIP5	1.58794				Met28	RPL12A	1.84302	Fkh1	ARG3	-1.25156
Stp2	SCS7	-1.2	Swi5	NFS1	1.58413				Met28	ECM1	1.84261	Fkh1	AHP1	-1.26117
Stp2	FMP52	-1.2	Swi5	BAP3	1.58122				Met28	BUD23	1.84216	Fkh1	NCE103	-1.26544
Stp2	THI2	-1.3	Swi5	AQR1	1.51102				Met28	LYS21	1.84042	Fkh1	SPS4	-1.28723
Stp2	MCD4	-1.4	Swi5	YHR033W	1.50866				Met28	TRP3	1.84019	Fkh1	PIC2	-1.30378
Stp2	ADE1	-1.5	Swi5	PUT4	1.49839				Met28	IMD2	1.83652	Fkh1	GCR1	-1.30856
Stp2	CWP2	-1.5	Swi5	MUP3	1.48603				Met28	ELO2	1.83563	Fkh1	ADH5	-1.32499
Stp2	PTR2	-1.6	Swi5	YBR071W	1.475				Met28	SLX9	1.83324	Fkh1	KEG1	-1.34894
Stp2	TIP1	-1.7	Swi5	ELO2	1.46394				Met28	GPX2	1.83191	Fkh1	CRG1	-1.34945
Stp2	RPI1	-1.7	Swi5	GCV1	1.46367				Met28	RPS17B	1.83104	Fkh1	DFR1	-1.373
Stp2	YER156C	-1.8	Swi5	HOF1	1.4627				Met28	BUD4	1.82637	Fkh1	SNA4	-1.37444
Stp2	YGP1	-2	Swi5	YOL019W	1.45881				Met28	ALK2	1.80791	Fkh1	YIR016W	-1.42004
Stp2	THI73	-2	Swi5	CCC2	1.4509				Met28	MEP3	1.80556	Fkh1	UGP1	-1.42378
Stp2	THI20	-2.2	Swi5	ILV2	1.41487				Met28	GDH1	1.798	Fkh1	CIP1	-1.44166
Stp2	YRO2	-2.5	Swi5	MAE1	1.39908				Met28	BAS1	1.79434	Fkh1	PST1	-1.44628
Stp2	TDH1	-2.6	Swi5	LEU9	1.37911				Met28	YGR161C-D	1.79354	Fkh1	MET14	-1.46482
Stp2	KAR2	-2.6	Swi5	Ho	1.37153				Met28	PXA2	1.79048	Fkh1	ATG33	-1.49135
Stp2	THI7	-3.1	Swi5	FIT2	1.36488				Met28	YPL245W	1.78487	Fkh1	HSP42	-1.50686
Stp2	HSP26	-3.8	Swi5	ASN1	1.35508				Met28	LYS9	1.78368	Fkh1	RIB1	-1.51325
Msn4	POT1	4.48216	Swi5	OPT2	1.35202				Met28	YMC1	1.78276	Fkh1	YEL073C	-1.53034
Msn4	RGI2	4.26624	Swi5	CTT1	1.34545				Met28	CSS1	1.7817	Fkh1	NIT1	-1.54379
Msn4	ANS1	4.13148	Swi5	ERG4	1.34246				Met28	ORT1	1.77982	Fkh1	MRH1	-1.57864
Msn4	HXK1	4.0661	Swi5	PIR1	1.33337				Met28	RTC2	1.7778	Fkh1	DCS1	-1.59584
Msn4	SFC1	4.00772	Swi5	HMX1	1.32688				Met28	LTE1	1.77212	Fkh1	BNA3	-1.60139
Msn4	ADY2	3.93125	Swi5	CYC1	1.32106				Met28	SWI4	1.77034	Fkh1	THI73	-1.61643
Msn4	MND1	3.87797	Swi5	FCY2	1.31422				Met28	MRC1	1.76768	Fkh1	CLB1	-1.64625
Msn4	CAR2	3.83668	Swi5	EXG1	1.31131				Met28	YGK1	1.7664	Fkh1	YJL213W	-1.67559
Msn4	ATG39	3.77734	Swi5	HRP1	1.2992				Met28	DIF1	1.7634	Fkh1	OPI3	-1.71585
Msn4	SIP4	3.75814	Swi5	BAT1	1.29344				Met28	IRR1	1.75771	Fkh1	VTC3	-1.73157
Msn4	PHO89	3.7189	Swi5	SUN4	1.28934				Met28	ATO3	1.75475	Fkh1	TPO4	-1.73216
Msn4	HXT2	3.69306	Swi5	HXT2	1.28836				Met28	IPI3	1.75193	Fkh1	ARA1	-1.73237
Msn4	SHC1	3.68177	Swi5	HTA2	1.28564				Met28	DUN1	1.74978	Fkh1	CIT3	-1.74688
Msn4	MAL12	3.63625	Swi5	CDC39	1.28178				Met28	OAR1	1.74968	Fkh1	PEP4	-1.7722
Msn4	MEI5	3.54109	Swi5	CSI2	1.27358				Met28	QDR2	1.74823	Fkh1	HAC1	-1.80073
Msn4	NDE2	3.52222	Swi5	SIM1	1.237				Met28	YBR184W	1.74769	Fkh1	RRT8	-1.80443
Msn4	IME2	3.47788	Swi5	SDA1	1.23494				Met28	ERG28	1.74205	Fkh1	PNC1	-1.8318
Msn4	YIG1	3.43714	Swi5	PUS1	1.23431				Met28	YBL005W-B	1.74097	Fkh1	MCR1	-1.84527
Msn4	PIR3	3.36425	Swi5	SED1	1.22986				Met28	RNT1	1.7338	Fkh1	PRB1	-1.86073
Msn4	PHO92	3.304	Swi5	ISU2	1.22973				Met28	BFA1	1.73289	Fkh1	GRE3	-1.88776
Msn4	IMD2	3.28626	Swi5	PUS7	1.21752				Met28	RPS9B	1.7311	Fkh1	YIP3	-1.92774
Msn4	YGR066C	3.23627	Swi5	SAM3	1.21353				Met28	PAC11	1.72806	Fkh1	ARG4	-1.94088
Msn4	SNO1	3.03071	Swi5	MIX17	1.19687				Met28	RIX7	1.72649	Fkh1	YLR345W	-1.95981
Msn4	ECM11	2.97092	Swi5	BUD14	1.18585				Met28	SNU13	1.72381	Fkh1	NDI1	-1.97746
Msn4	SRT1	2.96252	Swi5	YCR043C	1.18269				Met28	UME6	1.72276	Fkh1	LSP1	-1.97885
Msn4	SNZ1	2.92168	Swi5	PHO90	1.18076				Met28	HIS1	1.72153	Fkh1	ROQ1	-2.02396
Msn4	GCV2	2.91239	Swi5	PET9	1.17528				Met28	VHT1	1.71642	Fkh1	UGA1	-2.07662
Msn4	MPC3	2.87361	Swi5	RIX7	1.16328				Met28	PCD1	1.71293	Fkh1	PRX1	-2.10065
Msn4	CAR1	2.83052	Swi5	CHS2	1.15569				Met28	RPS13	1.7093	Fkh1	DDR48	-2.1154
Msn4	ICL1	2.81515	Swi5	MET17	1.15129				Met28	YBL028C	1.70862	Fkh1	YBR053C	-2.12888
Msn4	GPH1	2.73723	Swi5	HHF1	1.15001				Met28	RPS21B	1.70555	Fkh1	HSP31	-2.15838
Msn4	PDC6	2.69676	Swi5	ADE4	1.14577				Met28	DPB2	1.70407	Fkh1	YMR181C	-2.19526
Msn4	YBR285W	2.67983	Swi5	PRY2	1.14397				Met28	RPS18A	1.70371	Fkh1	PHR1	-2.25227
Msn4	MEK1	2.65422	Swi5	MDN1	1.14394				Met28	YBL086C	1.69812	Fkh1	COQ6	-2.26026
Msn4	FOX2	2.64651	Swi5	ZPR1	1.13332				Met28	SNQ2	1.69359	Fkh1	MET16	-2.26433
Msn4	MAL31	2.63129	Swi5	ILV3	1.13012				Met28	PYC1	1.69336	Fkh1	GSY2	-2.2719
Msn4	MET6	2.59598	Swi5	YIL169C	1.12021				Met28	SLI15	1.69206	Fkh1	GTT1	-2.27413
Msn4	CWP1	2.58596	Swi5	UTP14	1.11432				Met28	PYC2	1.68952	Fkh1	TMA17	-2.28044
Msn4	ACH1	2.56891	Swi5	NIP7	1.10542				Met28	LCB3	1.68885	Fkh1	MND1	-2.29027
Msn4	REG2	2.56122	Swi5	NOP14	1.09752				Met28	ASC1	1.68791	Fkh1	ATG42	-2.29722
Msn4	HMX1	2.53424	Swi5	FAA4	1.0959				Met28	CIA2	1.68579	Fkh1	MHO1	-2.3715
Msn4	BOP2	2.49758	Swi5	FUR1	1.08967				Met28	PUS1	1.68454	Fkh1	CYB2	-2.39589
Msn4	ALD4	2.4654	Swi5	EGT2	1.08817				Met28	CLB4	1.68171	Fkh1	YPS6	-2.42181
Msn4	TMA10	2.40195	Swi5	HAS1	1.0851				Met28	CPA1	1.68157	Fkh1	HXK1	-2.46742
Msn4	PCK1	2.39414	Swi5	NOP4	1.08397				Met28	AAH1	1.68132	Fkh1	DSE1	-2.49819
Msn4	GSY1	2.3926	Swi5	STP1	1.08188				Met28	MCM7	1.68031	Fkh1	AIM17	-2.50298
Msn4	FIT1	2.36789	Swi5	SRO9	1.08081				Met28	YFR035C	1.67874	Fkh1	ORM2	-2.52575
Msn4	SUE1	2.35977	Swi5	SWI5	1.07985				Met28	YGL039W	1.67517	Fkh1	YGR201C	-2.54305
Msn4	LEE1	2.331	Swi5	PTC6	1.07807				Met28	RPS22A	1.6718	Fkh1	TPS2	-2.59005
Msn4	NFS1	2.28641	Swi5	MAK21	1.07634				Met28	AIM20	1.66874	Fkh1	YGL117W	-2.61036
Msn4	IDP2	2.28401	Swi5	SQT1	1.07584				Met28	RRS1	1.66669	Fkh1	SUL2	-2.63951
Msn4	RTN2	2.263	Swi5	STE2	1.07531				Met28	YDR341C	1.66669	Fkh1	UBI4	-2.75128
Msn4	SPR1	2.26218	Swi5	ELP3	1.0708				Met28	NFS1	1.66632	Fkh1	ENO1	-2.77155
Msn4	FUS1	2.25925	Swi5	NOP7	1.06613				Met28	RPS20	1.66549	Fkh1	SCS3	-2.79904
Msn4	SPO11	2.24817	Swi5	NBA1	1.06324				Met28	FAA3	1.65744	Fkh1	IKS1	-2.81248
Msn4	FLO11	2.24748	Swi5	PWP1	1.06005				Met28	DRE2	1.65458	Fkh1	RDL1	-2.90496
Msn4	SPO13	2.2421	Swi5	NOP2	1.05621				Met28	MPC2	1.65438	Fkh1	YGP1	-2.9167
Msn4	HOP1	2.24135	Swi5	IXR1	1.05183				Met28	MCM5	1.65016	Fkh1	YLR177W	-2.94802
Msn4	YPR078C	2.24134	Swi5	FCF2	1.04416				Met28	FLO11	1.64951	Fkh1	MDH2	-2.98257
Msn4	SPS22	2.21699	Swi5	BMS1	1.04155				Met28	TPC1	1.64886	Fkh1	YPL247C	-3.02302
Msn4	CAT2	2.19537	Swi5	GAR1	1.03231				Met28	RIX1	1.64292	Fkh1	APE1	-3.04954
Msn4	KIN82	2.17555	Swi5	NMD3	1.02744				Met28	STB1	1.64226	Fkh1	GDB1	-3.05473
Msn4	BIO4	2.16596	Swi5	TMA46	1.02253				Met28	YAP7	1.63872	Fkh1	RGI1	-3.05951
Msn4	ZRT1	2.1454	Swi5	ESF1	1.02175				Met28	FPR4	1.63587	Fkh1	WSC4	-3.11537
Msn4	GND2	2.13316	Swi5	LSG1	1.02091				Met28	MEC1	1.63397	Fkh1	YMR315W	-3.14378
Msn4	YLR149C	2.13285	Swi5	YVH1	1.01939				Met28	GLN1	1.63289	Fkh1	GOR1	-3.26224
Msn4	CTS1	2.12095	Swi5	MTR3	1.01703				Met28	PXA1	1.63112	Fkh1	SDS24	-3.34963
Msn4	POX1	2.08204	Swi5	ECM2	1.017				Met28	HMT1	1.63084	Fkh1	MET3	-3.36255
Msn4	ALD6	2.07586	Swi5	YMR310C	1.0141				Met28	SLK19	1.62543	Fkh1	OM45	-3.49911
Msn4	PMA2	2.07485	Swi5	ALD4	1.0136				Met28	RRP36	1.62424	Fkh1	TPS1	-3.52198
Msn4	GAD1	2.07181	Swi5	SAM1	1.01221				Met28	SPE3	1.62359	Fkh1	GLC3	-3.52655
Msn4	YHR033W	2.05591	Swi5	DIP2	1.01111				Met28	YEL077C	1.62352	Fkh1	ICY1	-3.56957
Msn4	XKS1	2.03989	Swi5	YTM1	1.01088				Met28	AAP1	1.61337	Fkh1	TMA10	-3.59065
Msn4	YMR206W	2.03222	Swi5	KIN3	1.00537				Met28	AIR1	1.61078	Fkh1	AMS1	-3.82797
Msn4	PDH1	2.03104	Swi5	APN2	-1.0027				Met28	BUD16	1.60661	Fkh1	BNA1	-3.93001
Msn4	CRC1	2.02081	Swi5	LHS1	-1.0219				Met28	PFD1	1.60653	Fkh1	CTT1	-3.9448
Msn4	TMA17	2.01812	Swi5	YGP1	-1.02954				Met28	PDR5	1.60482	Fkh1	RTC2	-4.01135
Msn4	DCI1	2.0136	Swi5	DIA4	-1.03289				Met28	RPL28	1.60161	Fkh1	GSY1	-4.01423
Msn4	MET17	2.00654	Swi5	YPL247C	-1.0667				Met28	CTR1	1.60109	Fkh1	GLK1	-4.02352
Msn4	GUT2	1.99273	Swi5	GPX2	-1.07798				Met28	SMM1	1.59889	Fkh1	EMI2	-4.15532
Msn4	REC114	1.99209	Swi5	SNX4	-1.10841				Met28	ALK1	1.59826	Fkh1	GPH1	-4.16743
Msn4	MMP1	1.99114	Swi5	YRO2	-1.10981				Met28	RPS25B	1.59335	Fkh1	STR3	-4.17991
Msn4	PHO5	1.96325	Swi5	OPI10	-1.12062				Met28	POL2	1.59068	Fkh1	GTO3	-4.20189
Msn4	MPH3	1.94039	Swi5	DAL5	-1.12099				Met28	RMT2	1.59015	Fkh1	MET17	-4.25808
Msn4	YKR075C	1.93223	Swi5	YER079W	-1.12118				Met28	RPS15	1.58819	Fkh1	PHM8	-4.26506
Msn4	CSR2	1.92125	Swi5	SAG1	-1.12476				Met28	CSM1	1.58719	Fkh1	YNL134C	-4.58868
Msn4	GDB1	1.89305	Swi5	POA1	-1.12951				Met28	RPL37A	1.5863	Fkh1	GCY1	-4.63904
Msn4	SGA1	1.88433	Swi5	ENO2	-1.13246				Met28	YBL113C	1.58567	Fkh1	TFS1	-4.68853
Msn4	RRT12	1.88348	Swi5	AIM23	-1.13716				Met28	BAT1	1.58382	Fkh1	FMP33	-4.69495
Msn4	YDL218W	1.87866	Swi5	PLB1	-1.13724				Met28	DUS3	1.58161	Fkh1	GAD1	-4.83004
Msn4	CTR3	1.87853	Swi5	YGK3	-1.14157				Met28	RPL15A	1.57921	Fkh1	YLR149C	-4.85101
Msn4	PXA1	1.86629	Swi5	CMG1	-1.14559				Met28	RPL38	1.57723	Fkh1	RTC3	-4.96257
Msn4	YCR050C	1.85619	Swi5	GDB1	-1.15				Met28	RPS31	1.57444	Fkh1	PGM2	-4.96377
Msn4	YGR053C	1.85547	Swi5	RRF1	-1.15312				Met28	UTP15	1.57376	Fkh1	MSC1	-5.07083
Msn4	ATG8	1.84983	Swi5	LAM5	-1.16309				Met28	RPL5	1.57111	Fkh1	DCS2	-5.14544
Msn4	YDL199C	1.84805	Swi5	SNX41	-1.16326				Met28	RPA43	1.56771	Fkh1	HSP26	-5.19809
Msn4	PHM7	1.84002	Swi5	SUL2	-1.16363				Met28	LTV1	1.56654	Fkh1	PYK2	-5.31611
Msn4	RDL1	1.83281	Swi5	ROD1	-1.17157				Met28	SER1	1.56378	Fkh1	YDL124W	-5.3542
Msn4	FAT3	1.82453	Swi5	YMR252C	-1.17806				Met28	SPL2	1.56371	Fkh1	RTN2	-5.38257
Msn4	YBR184W	1.82302	Swi5	PGM2	-1.18244				Met28	RAD27	1.56325	Fkh1	PBI2	-5.4905
Msn4	HXT4	1.82192	Swi5	YBR241C	-1.18427				Met28	TRM1	1.56087	Fkh1	TDH1	-5.6238
Msn4	KNH1	1.81083	Swi5	ETR1	-1.18935				Met28	IMP3	1.55834	Fkh1	STF2	-5.83894
Msn4	ACS1	1.80831	Swi5	YPL109C	-1.18945				Met28	UTP6	1.5538	Fkh1	TSL1	-5.88056
Msn4	ECL1	1.80811	Swi5	SSA2	-1.20163				Met28	TOP2	1.55331	Fkh1	IGD1	-6.51354
Msn4	PIG1	1.80208	Swi5	YKR011C	-1.21231				Met28	TIR2	1.5502	Fkh1	GIT1	-7.43554
Msn4	YOL024W	1.80191	Swi5	YJL070C	-1.22472				Met28	RPL7A	1.54859	Fkh1	HSP12	-8.03477
Msn4	EMI2	1.79446	Swi5	SLI1	-1.22523				Met28	EMC1	1.54829	Kar4	VAM10	8.3698
Msn4	YER085C	1.78308	Swi5	ATG34	-1.22849				Met28	NIP7	1.54807	Kar4	CUP1-1	8.05604
Msn4	MAL32	1.77407	Swi5	COQ4	-1.23675				Met28	AFI1	1.54344	Kar4	BSC1	6.62373
Msn4	VHT1	1.76496	Swi5	FMS1	-1.25119				Met28	ZRC1	1.54086	Kar4	PRM7	5.85006
Msn4	LEU2	1.75498	Swi5	YNL144C	-1.25271				Met28	MTD1	1.53797	Kar4	FLO11	5.67732
Msn4	FET3	1.75393	Swi5	ERO1	-1.25527				Met28	YHR127W	1.53681	Kar4	ZNF1	4.89391
Msn4	GAP1	1.74254	Swi5	FMO1	-1.25835				Met28	YCR023C	1.5318	Kar4	VEL1	4.14692
Msn4	YNR064C	1.74121	Swi5	HNT2	-1.25983				Met28	YML018C	1.53134	Kar4	YJL218W	3.46451
Msn4	MDH1	1.73255	Swi5	FMP23	-1.26209				Met28	ARO3	1.53104	Kar4	SUN4	3.28777
Msn4	AGX1	1.73115	Swi5	YPC1	-1.26255				Met28	ACM1	1.52968	Kar4	SPB1	3.17525
Msn4	YJR149W	1.73012	Swi5	FYV10	-1.2791				Met28	SYO1	1.5266	Kar4	ARO9	3.13265
Msn4	UGX2	1.72892	Swi5	UBX6	-1.2795				Met28	ATF2	1.52618	Kar4	FCY2	2.9325
Msn4	MET10	1.72147	Swi5	ATG9	-1.28176				Met28	MXR2	1.52604	Kar4	CDC6	2.84335
Msn4	AGP2	1.7193	Swi5	JEN1	-1.29078				Met28	ERG13	1.52591	Kar4	FUI1	2.70419
Msn4	PDC5	1.68905	Swi5	PUN1	-1.29546				Met28	RPL27A	1.52029	Kar4	PRM5	2.65121
Msn4	HPA2	1.68746	Swi5	ZWF1	-1.30058				Met28	NOC4	1.51949	Kar4	YGK1	2.49655
Msn4	CAT8	1.67999	Swi5	GYP7	-1.30305				Met28	BRX1	1.51697	Kar4	BTN2	2.38173
Msn4	YGL081W	1.66129	Swi5	MSF1	-1.30498				Met28	URA7	1.51366	Kar4	MAK16	2.27328
Msn4	HXT5	1.66037	Swi5	YGL117W	-1.31202				Met28	RPL4A	1.50877	Kar4	ERG3	2.2579
Msn4	YNL195C	1.65691	Swi5	MRK1	-1.31986				Met28	ERG8	1.50853	Kar4	IRC7	2.23753
Msn4	ARO9	1.64746	Swi5	YLR177W	-1.3268				Met28	RPL7B	1.50836	Kar4	ADE17	2.14676
Msn4	HVG1	1.63034	Swi5	YLR194C	-1.33545				Met28	PKP2	1.50754	Kar4	SRP40	2.14283
Msn4	KCC4	1.6224	Swi5	RRI2	-1.33618				Met28	RGM1	1.50696	Kar4	DUR1,2	2.11982
Msn4	MRC1	1.62193	Swi5	MOH1	-1.33747				Met28	MDG1	1.50671	Kar4	YNL058C	2.11861
Msn4	YBR284W	1.6171	Swi5	BDH2	-1.34509				Met28	RPS16A	1.50495	Kar4	RPL43B	2.09866
Msn4	STR3	1.61365	Swi5	UBP11	-1.36486				Met28	RRP3	1.49821	Kar4	ISU2	2.09509
Msn4	DAK2	1.60216	Swi5	SEO1	-1.36773				Met28	MEF2	1.49789	Kar4	YML131W	2.06673
Msn4	SUL1	1.59007	Swi5	YHR022C	-1.37102				Met28	RPL40B	1.4946	Kar4	MHT1	2.05407
Msn4	MBR1	1.57239	Swi5	YCT1	-1.37161				Met28	RPS3	1.49438	Kar4	DBP7	2.05365
Msn4	YNL194C	1.57227	Swi5	GUT1	-1.38086				Met28	YLR326W	1.49251	Kar4	GFD2	2.00569
Msn4	YDR018C	1.57049	Swi5	OYE2	-1.39299				Met28	SRM1	1.49196	Kar4	ADE1	1.9611
Msn4	CIT1	1.56883	Swi5	URA10	-1.40108				Met28	UTP4	1.48685	Kar4	NOP4	1.87158
Msn4	YMR085W	1.56872	Swi5	YIL055C	-1.40557				Met28	AMD2	1.48418	Kar4	KTR5	1.86643
Msn4	IZH4	1.5654	Swi5	YPL014W	-1.4074				Met28	DUT1	1.48132	Kar4	PAU12	1.86479
Msn4	DON1	1.55958	Swi5	GSM1	-1.42964				Met28	RPL8B	1.48079	Kar4	HCA4	1.86328
Msn4	SSA3	1.54747	Swi5	THI13	-1.45296				Met28	YMR045C	1.48051	Kar4	DIP5	1.85759
Msn4	LDS2	1.54633	Swi5	YOR385W	-1.46175				Met28	SPO12	1.47373	Kar4	ECM1	1.84161
Msn4	HOP2	1.53853	Swi5	ATG5	-1.50548				Met28	YHM2	1.47312	Kar4	YVH1	1.83897
Msn4	HEF3	1.53799	Swi5	OXR1	-1.5123				Met28	RPL36B	1.47224	Kar4	ADE4	1.83015
Msn4	ADY3	1.53636	Swi5	FRT2	-1.51886				Met28	ECM10	1.47089	Kar4	RRN7	1.78894
Msn4	PDR10	1.53093	Swi5	FUS2	-1.5202				Met28	RPL23A	1.47016	Kar4	FCF2	1.73993
Msn4	SPS19	1.52977	Swi5	ACB1	-1.55137				Met28	STM1	1.46994	Kar4	ESF1	1.71961
Msn4	QDR2	1.52945	Swi5	UGA2	-1.55347				Met28	CLB2	1.46544	Kar4	SEN34	1.7159
Msn4	PEX18	1.52886	Swi5	GSY1	-1.55653				Met28	RPL10	1.46193	Kar4	URA1	1.69837
Msn4	CLD1	1.52833	Swi5	UBC8	-1.57384				Met28	GUA1	1.4617	Kar4	ADE2	1.69051
Msn4	AAC1	1.52557	Swi5	AIM19	-1.57861				Met28	APA1	1.46112	Kar4	RCL1	1.68255
Msn4	FMP48	1.52329	Swi5	TDH2	-1.58494				Met28	ERG24	1.46084	Kar4	SLK19	1.64227
Msn4	FAA2	1.52261	Swi5	OSW2	-1.61238				Met28	HCA4	1.45598	Kar4	SHE1	1.63995
Msn4	YBR139W	1.5128	Swi5	TIR4	-1.61742				Met28	AQR1	1.45422	Kar4	RPS21A	1.63153
Msn4	LYS1	1.50894	Swi5	TSA2	-1.62251				Met28	DBF2	1.45412	Kar4	NOP15	1.60915
Msn4	YJL225C	1.50584	Swi5	GAL2	-1.63173				Met28	PDR10	1.45402	Kar4	NOP1	1.60409
Msn4	ECM4	1.50478	Swi5	SET6	-1.63969				Met28	ESC8	1.45348	Kar4	KAR4	1.59901
Msn4	CIT3	1.50278	Swi5	YDL124W	-1.65441				Met28	RPS21A	1.45021	Kar4	RKI1	1.59828
Msn4	CCC2	1.49678	Swi5	GAL1	-1.66237				Met28	CHS2	1.44875	Kar4	RPL37A	1.59534
Msn4	UGA4	1.48864	Swi5	IKS1	-1.66299				Met28	FCY1	1.44708	Kar4	DAL1	1.5872
Msn4	USV1	1.47994	Swi5	IMA1	-1.66502				Met28	RPL14B	1.44649	Kar4	RRP8	1.57858
Msn4	RTC2	1.47232	Swi5	ECM12	-1.69309				Met28	BFR2	1.44189	Kar4	UTR4	1.57188
Msn4	YOR387C	1.47069	Swi5	SPO23	-1.69885				Met28	YDR170W-A	1.44182	Kar4	BAT2	1.55026
Msn4	GDH2	1.46367	Swi5	GDH3	-1.72567				Met28	MKC7	1.44042	Kar4	RPC10	1.54883
Msn4	YNR062C	1.45645	Swi5	THI20	-1.7689				Met28	RPL3	1.4404	Kar4	KAP122	1.54763
Msn4	PRX1	1.45487	Swi5	TIR1	-1.77054				Met28	MPS3	1.43963	Kar4	TIP1	1.54527
Msn4	PUG1	1.45441	Swi5	GAS2	-1.77073				Met28	URK1	1.43712	Kar4	RPP0	1.53596
Msn4	YPR127W	1.44008	Swi5	GRE2	-1.78851				Met28	STU1	1.43627	Kar4	RPL27A	1.52109
Msn4	PGM2	1.43736	Swi5	HUL4	-1.8172				Met28	RPS18B	1.4351	Kar4	NOP8	1.51581
Msn4	MXR2	1.42959	Swi5	ROG3	-1.83309				Met28	ENP2	1.43508	Kar4	FAF1	1.51274
Msn4	CYB2	1.42206	Swi5	EMI2	-1.83561				Met28	PDS5	1.43345	Kar4	HO	1.49949
Msn4	YJL045W	1.42118	Swi5	MPD1	-1.83683				Met28	OPT1	1.4312	Kar4	NOP53	1.49577
Msn4	HIS4	1.41338	Swi5	ARO10	-1.84821				Met28	CIN2	1.4302	Kar4	ERG13	1.48595
Msn4	PBI1	1.41134	Swi5	MET3	-1.84918				Met28	YTM1	1.42659	Kar4	HPT1	1.4693
Msn4	PEX21	1.39726	Swi5	SDD1	-1.8636				Met28	SKP2	1.42639	Kar4	ACM1	1.46604
Msn4	PEX11	1.38978	Swi5	FRE7	-1.89134				Met28	RPS7A	1.42543	Kar4	SLI15	1.45372
Msn4	SAF1	1.38786	Swi5	SGA1	-1.90318				Met28	GBP2	1.42089	Kar4	RPS21B	1.45066
Msn4	YKR005C	1.38263	Swi5	GIP1	-1.90706				Met28	YHB1	1.41908	Kar4	RPL24A	1.44973
Msn4	XBP1	1.37748	Swi5	TIR3	-1.93601				Met28	EMW1	1.41902	Kar4	URB1	1.42588
Msn4	OM14	1.37622	Swi5	SMA1	-1.95009				Met28	FAA4	1.41899	Kar4	RPL4A	1.41607
Msn4	YPT53	1.37559	Swi5	YHR138C	-1.96512				Met28	ACO1	1.41657	Kar4	SWI4	1.40691
Msn4	FRE1	1.37016	Swi5	ANB1	-1.97483				Met28	ERG4	1.41579	Kar4	TRM1	1.40066
Msn4	REC102	1.36672	Swi5	MIP6	-1.97509				Met28	RPL1B	1.41558	Kar4	POL30	1.39472
Msn4	UGA1	1.35612	Swi5	YOR289W	-1.97532				Met28	RLP24	1.41438	Kar4	RPL22A	1.39446
Msn4	GTO3	1.35436	Swi5	GLG1	-2.02809				Met28	RPL22B	1.41355	Kar4	CDC5	1.39371
Msn4	YPK2	1.35397	Swi5	YJR149W	-2.03639				Met28	CDC20	1.40579	Kar4	SPC42	1.37393
Msn4	FMP45	1.35364	Swi5	TEP1	-2.0413				Met28	ARO1	1.40394	Kar4	RPL31A	1.37124
Msn4	NQM1	1.35302	Swi5	IMA2	-2.04734				Met28	YLR410W-B	1.40302	Kar4	RPL3	1.35632
Msn4	MDH2	1.34954	Swi5	ADH5	-2.0608				Met28	YDR274C	1.40012	Kar4	NSR1	1.30376
Msn4	YPL264C	1.33446	Swi5	DSE1	-2.08863				Met28	STP22	1.39997	Kar4	ILV6	1.29672
Msn4	YJL163C	1.33225	Swi5	YPT53	-2.10552				Met28	TAF2	1.39724	Kar4	VHR2	1.29516
Msn4	PUT1	1.33087	Swi5	FHN1	-2.1387				Met28	RPP2B	1.39626	Kar4	URA4	1.29484
Msn4	APJ1	1.32445	Swi5	RTA1	-2.14103				Met28	YLR125W	1.39604	Kar4	RPS10A	1.28682
Msn4	YMR262W	1.32171	Swi5	SRL4	-2.1524				Met28	YBR012W-B	1.39422	Kar4	ELO3	1.2752
Msn4	XYL2	1.32164	Swi5	DIA1	-2.16505				Met28	RPS17A	1.39408	Kar4	RAX2	1.26577
Msn4	SRL3	1.31895	Swi5	ATG7	-2.16996				Met28	PHO90	1.39344	Kar4	SPC29	1.24183
Msn4	STP22	1.31729	Swi5	YFL040W	-2.17236				Met28	UTP25	1.39307	Kar4	CLA4	1.23959
Msn4	FRM2	1.31702	Swi5	THI12	-2.18046				Met28	LDO45	1.39162	Kar4	RPL35A	1.22817
Msn4	DBP1	1.31395	Swi5	GAL7	-2.23598				Met28	OCA2	1.3905	Kar4	RPL25	1.21082
Msn4	GOR1	1.30836	Swi5	YNL092W	-2.24784				Met28	ADI1	1.38724	Kar4	DBF2	1.20636
Msn4	YLR460C	1.29974	Swi5	MDG1	-2.32735				Met28	IQG1	1.38679	Kar4	TIR2	1.1753
Msn4	AIM17	1.29649	Swi5	PBI2	-2.34434				Met28	RPP2A	1.38581	Kar4	ZUO1	1.15563
Msn4	GTT1	1.29597	Swi5	DSF1	-2.35969				Met28	ALG5	1.38541	Kar4	RAD5	1.15528
Msn4	GAL3	1.29138	Swi5	IMA4	-2.36577				Met28	RPL11A	1.38387	Kar4	URM1	1.14615
Msn4	SAP4	1.29098	Swi5	EMP46	-2.36751				Met28	GDT1	1.38222	Kar4	RPS27B	1.14229
Msn4	TKL2	1.28956	Swi5	ENO1	-2.4486				Met28	RRP9	1.38092	Kar4	PXR1	1.13739
Msn4	NGR1	1.28254	Swi5	THI5	-2.45061				Met28	REC104	1.38003	Kar4	EMP70	1.12937
Msn4	PRM10	1.28192	Swi5	HSP26	-2.46302				Met28	ADH4	1.37715	Kar4	YLL054C	1.12626
Msn4	SAM3	1.28073	Swi5	HXT9	-2.49769				Met28	UGA2	1.37515	Kar4	RPS26A	1.12311
Msn4	VPS73	1.27472	Swi5	YSW1	-2.59154				Met28	YDL157C	1.37453	Kar4	BMT6	1.12251
Msn4	PEX15	1.26244	Swi5	TPO4	-2.63767				Met28	RPL31A	1.37437	Kar4	TRL1	1.1209
Msn4	AFR1	1.26139	Swi5	CMK2	-2.94594				Met28	TIS11	1.37373	Kar4	RPP1A	1.11391
Msn4	BIO3	1.25827	Swi5	HES1	-3.07374				Met28	YHP1	1.37286	Kar4	NIS1	1.11375
Msn4	PHR1	1.25778	Swi5	STE3	-3.19711				Met28	PRS4	1.37284	Kar4	YGR035C	1.10114
Msn4	ATG15	1.25771	Swi5	YET2	-3.23828				Met28	CWH43	1.37161	Kar4	RPL24B	1.09972
Msn4	MSS11	1.25224	Swi5	KAR2	-3.26599				Met28	MAK5	1.37134	Kar4	OPT1	1.09056
Msn4	FEN2	1.24948	Swi5	TDH1	-4.49929				Met28	DRS1	1.37011	Kar4	RPL35B	1.06405
Msn4	IZH1	1.23929	Stp1	SIT1	3.2006				Met28	YHL050C	1.36954	Kar4	HHF1	1.05456
Msn4	MUM3	1.22122	Stp1	NDE1	2.52121				Met28	YLR046C	1.3694	Kar4	CDC20	1.04193
Msn4	HBT1	1.2189	Stp1	FIT3	2.34646				Met28	ERB1	1.36821	Kar4	AFI1	1.03668
Msn4	DUN1	1.21875	Stp1	MET6	2.27819				Met28	ATC1	1.36657	Kar4	RAD51	1.03631
Msn4	PFK26	1.21722	Stp1	FIT1	2.20538				Met28	YKL033W-A	1.36221	Kar4	YIH1	1.03475
Msn4	FMP40	1.21372	Stp1	OPT1	2.06882				Met28	KRS1	1.36156	Kar4	YJR124C	1.03145
Msn4	RIM4	1.20229	Stp1	HIS4	1.86943				Met28	TAH1	1.36116	Kar4	LYS20	1.02891
Msn4	HEK2	1.19992	Stp1	GIC2	1.86717				Met28	YOL029C	1.3611	Kar4	RPS23A	1.0202
Msn4	YTP1	1.19808	Stp1	MUP1	1.8239				Met28	CIK1	1.35981	Kar4	LYS9	1.00894
Msn4	LSB5	1.19687	Stp1	YNL058C	1.80554				Met28	RPS8B	1.35974	Kar4	TIF11	1.00433
Msn4	MXR1	1.19104	Stp1	FYV5	1.74673				Met28	RPS24B	1.35974	Kar4	WTM1	-1.00328
Msn4	BAR1	1.18308	Stp1	GDH1	1.71052				Met28	VFA1	1.35855	Kar4	HSP78	-1.00755
Msn4	MSN4	1.18011	Stp1	DIP5	1.58794				Met28	ROK1	1.35573	Kar4	POM33	-1.02061
Msn4	ICS2	1.17955	Stp1	BAP3	1.58122				Met28	MSH4	1.35436	Kar4	DMA2	-1.03756
Msn4	ATG33	1.17838	Stp1	YBR071W	1.475				Met28	ATG2	1.3533	Kar4	PRP45	-1.04407
Msn4	TRX3	1.17047	Stp1	GCV1	1.46367				Met28	ERG12	1.35308	Kar4	SRY1	-1.04471
Msn4	SPH1	1.1703	Stp1	CCC2	1.4509				Met28	RRP43	1.35258	Kar4	BXI1	-1.051
Msn4	HHO1	1.16823	Stp1	ARN2	1.4194				Met28	RPL16B	1.35234	Kar4	AAD4	-1.0529
Msn4	BUD3	1.16787	Stp1	FIT2	1.36488				Met28	NRK1	1.35183	Kar4	RIM11	-1.05889
Msn4	GGA1	1.16039	Stp1	OPT2	1.35202				Met28	RPL12B	1.3489	Kar4	BIO2	-1.05969
Msn4	CYC3	1.15216	Stp1	PIN2	1.33483				Met28	RPL24A	1.34869	Kar4	NUR1	-1.0691
Msn4	GPT2	1.1502	Stp1	HMX1	1.32688				Met28	BNS1	1.34755	Kar4	BIO3	-1.07277
Msn4	RNY1	1.13842	Stp1	CLB1	1.31322				Met28	RPA34	1.34648	Kar4	YOR019W	-1.0731
Msn4	AGP1	1.1295	Stp1	BAT1	1.29344				Met28	MCM10	1.34494	Kar4	MGA1	-1.07808
Msn4	BAP3	1.11751	Stp1	HTA2	1.28564				Met28	YJL225C	1.34465	Kar4	HSP104	-1.08119
Msn4	CPR4	1.11612	Stp1	SIM1	1.237				Met28	NOP1	1.34194	Kar4	AGA1	-1.10102
Msn4	STP2	1.11185	Stp1	SED1	1.22986				Met28	TOD6	1.341	Kar4	MET6	-1.10242
Msn4	EMP46	1.10891	Stp1	ISU2	1.22973				Met28	MET6	1.33842	Kar4	YGL235W	-1.10967
Msn4	YLR049C	1.1035	Stp1	GAS3	1.19347				Met28	MCM6	1.33776	Kar4	YKR041W	-1.11067
Msn4	YNR065C	1.09971	Stp1	CPR8	1.16924				Met28	NOP8	1.33599	Kar4	ATX1	-1.12141
Msn4	NCA2	1.09551	Stp1	HHF1	1.15001				Met28	RPS6B	1.33467	Kar4	YAL037W	-1.12337
Msn4	STB2	1.09548	Stp1	PRY2	1.14397				Met28	RAD18	1.33396	Kar4	MET2	-1.12887
Msn4	YGR201C	1.08963	Stp1	HHT1	1.12469				Met28	LYS12	1.33371	Kar4	MPC3	-1.13082
Msn4	ADR1	1.08408	Stp1	ADE1	1.11261				Met28	TOP3	1.33023	Kar4	SNX4	-1.1377
Msn4	LSP1	1.08263	Stp1	COX5a	1.08848				Met28	ISU2	1.32898	Kar4	FUN26	-1.14698
Msn4	TSA2	1.07825	Stp1	STP1	1.08188				Met28	MCM2	1.32843	Kar4	RTA1	-1.1563
Msn4	BNA3	1.07511	Stp1	SWI5	1.07985				Met28	PMD1	1.32842	Kar4	PHO84	-1.15715
Msn4	YMR181C	1.07034	Stp1	VHR2	1.05665				Met28	RPS23B	1.32774	Kar4	VLD1	-1.1693
Msn4	YGL039W	1.06448	Stp1	ADE6	1.03027				Met28	RRP7	1.32596	Kar4	YLR042C	-1.16968
Msn4	SPG5	1.05805	Stp1	COS1	-1.00099				Met28	YML119W	1.32457	Kar4	RSB1	-1.2175
Msn4	ISU1	1.05101	Stp1	FCY21	-1.02868				Met28	RPL25	1.32187	Kar4	INO4	-1.22168
Msn4	HOS3	1.03778	Stp1	YGP1	-1.02954				Met28	HOS3	1.31649	Kar4	PHM6	-1.23434
Msn4	GCY1	1.03737	Stp1	TPS1	-1.05247				Met28	WAR1	1.31455	Kar4	ARG3	-1.25156
Msn4	SDS24	1.02702	Stp1	YMR210W	-1.05533				Met28	UTP13	1.31398	Kar4	PDR8	-1.25942
Msn4	ECM38	1.01752	Stp1	YET3	-1.0625				Met28	YEH1	1.3137	Kar4	YKR011C	-1.26662
Msn4	DAL1	1.0162	Stp1	GPX2	-1.07798				Met28	TRL1	1.31255	Kar4	YDR274C	-1.28747
Msn4	YOR019W	1.01198	Stp1	CPR6	-1.08387				Met28	HOF1	1.31241	Kar4	DIC1	-1.29327
Msn4	PST2	1.01158	Stp1	BNA4	-1.09724				Met28	HMG1	1.31216	Kar4	SSA4	-1.31579
Msn4	TIS11	1.00793	Stp1	YRO2	-1.10981				Met28	RPL43A	1.31185	Kar4	ADH5	-1.32499
Msn4	TFS1	1.00446	Stp1	OPI10	-1.12062				Met28	RPL17B	1.30686	Kar4	EUG1	-1.33803
Msn4	ARE1	1.0042	Stp1	DAL5	-1.12099				Met28	RPL18A	1.3065	Kar4	AGP3	-1.34166
Msn4	FUN19	1.0005	Stp1	MYO3	-1.12289				Met28	TRM13	1.30542	Kar4	PUL3	-1.35485
Msn4	GRE3	-1	Stp1	UIP3	-1.14417				Met28	RPL22A	1.30516	Kar4	MXR1	-1.37085
Msn4	GPM1	-1	Stp1	SUL2	-1.16363				Met28	CAF16	1.30505	Kar4	DFR1	-1.373
Msn4	ERG11	-1	Stp1	MCH4	-1.20208				Met28	ATR1	1.30488	Kar4	ECI1	-1.37377
Msn4	ERO1	-1	Stp1	YPS6	-1.2052				Met28	YLR030W	1.30371	Kar4	HVG1	-1.38293
Msn4	PHD1	-1	Stp1	ATG34	-1.22849				Met28	DBP3	1.30264	Kar4	YDL211C	-1.40056
Msn4	RPS11a	-1	Stp1	DAL4	-1.26442				Met28	HOT13	1.30154	Kar4	AEP3	-1.40912
Msn4	HEM15	-1	Stp1	ZWF1	-1.30058				Met28	HAS1	1.30082	Kar4	MSC3	-1.41109
Msn4	RPP1b	-1	Stp1	YLR194C	-1.33545				Met28	CAN1	1.30075	Kar4	YIR016W	-1.42004
Msn4	GPX2	-1.1	Stp1	RRI2	-1.33618				Met28	BIO2	1.29974	Kar4	UGP1	-1.42378
Msn4	HXT1	-1.1	Stp1	ADD37	-1.34984				Met28	NRP1	1.29972	Kar4	PST1	-1.44628
Msn4	ENO1	-1.1	Stp1	DER1	-1.40521				Met28	AIM3	1.29897	Kar4	RTT105	-1.45067
Msn4	GRE2	-1.1	Stp1	YPS1	-1.4422				Met28	UTP23	1.29887	Kar4	MHP1	-1.47228
Msn4	MGE1	-1.1	Stp1	YOR385W	-1.46175				Met28	RPL20A	1.29819	Kar4	HSP42	-1.50686
Msn4	PDC1	-1.1	Stp1	YNR071C	-1.46591				Met28	ATF1	1.29693	Kar4	YHR140W	-1.57711
Msn4	DBP2	-1.1	Stp1	OXR1	-1.5123				Met28	HUL4	1.2948	Kar4	ECM18	-1.60643
Msn4	UBX6	-1.1	Stp1	RCN2	-1.54828				Met28	YDL183C	1.29448	Kar4	YKL071W	-1.60646
Msn4	RPL22b	-1.1	Stp1	GSY1	-1.55653				Met28	RDH54	1.29445	Kar4	PRM2	-1.61073
Msn4	RPL26a	-1.1	Stp1	TIR4	-1.61742				Met28	PUF6	1.29216	Kar4	IMA5	-1.61851
Msn4	RPL27b	-1.1	Stp1	UGA4	-1.62884				Met28	MSA2	1.28909	Kar4	SSH4	-1.63646
Msn4	RPL9b	-1.1	Stp1	TPO2	-1.63863				Met28	CDC21	1.28721	Kar4	HUA2	-1.65054
Msn4	MIX23	-1.1	Stp1	MCD4	-1.6828				Met28	RPL4B	1.28426	Kar4	HEM13	-1.65161
Msn4	RPE1	-1.1	Stp1	COQ11	-1.70606				Met28	YPR202W	1.28367	Kar4	YJL213W	-1.67559
Msn4	RPS25b	-1.1	Stp1	YLR031W	-1.71768				Met28	MDM1	1.28302	Kar4	RNR3	-1.72434
Msn4	TRM7	-1.1	Stp1	GDH3	-1.72567				Met28	IDP2	1.27978	Kar4	VTC3	-1.73157
Msn4	PCL1	-1.2	Stp1	THI20	-1.7689				Met28	RPS8A	1.27711	Kar4	PEX18	-1.75748
Msn4	SCS7	-1.2	Stp1	TIR1	-1.77054				Met28	RPS16B	1.27595	Kar4	YMR244W	-1.80944
Msn4	GLO1	-1.2	Stp1	YMR085W	-1.77645				Met28	YPT31	1.27174	Kar4	YDR391C	-1.82797
Msn4	CDC19	-1.2	Stp1	EMI2	-1.83561				Met28	KIP2	1.27077	Kar4	ROG3	-1.86004
Msn4	MTD1	-1.2	Stp1	MET3	-1.84918				Met28	RPL32	1.27074	Kar4	RME1	-1.90916
Msn4	PHO3	-1.2	Stp1	TIR3	-1.93601				Met28	GUT1	1.26766	Kar4	FIG1	-1.91546
Msn4	SSA2	-1.2	Stp1	YBR056W	-2.00805				Met28	RPL34A	1.26765	Kar4	FRT2	-1.91729
Msn4	SBH1	-1.2	Stp1	YMR316C-A	-2.01433				Met28	SHB17	1.26563	Kar4	YER152C	-1.91964
Msn4	NOC3	-1.2	Stp1	THI73	-2.04197				Met28	MSH3	1.26558	Kar4	NRG2	-1.92624
Msn4	HPT1	-1.2	Stp1	RTA1	-2.14103				Met28	POL4	1.26269	Kar4	MOH1	-1.9514
Msn4	IRC22	-1.2	Stp1	DIA1	-2.16505				Met28	YGR210C	1.26245	Kar4	ROQ1	-2.02396
Msn4	YDR210W	-1.2	Stp1	PBI2	-2.34434				Met28	CPS1	1.26208	Kar4	ICT1	-2.05137
Msn4	HLR1	-1.3	Stp1	HSP26	-2.46302				Met28	UTP21	1.25895	Kar4	SED1	-2.12371
Msn4	DOG1	-1.3	Stp1	TPO4	-2.63767				Met28	YML082W	1.25861	Kar4	SIP4	-2.13693
Msn4	ENO2	-1.3	Stp1	CMK2	-2.94594				Met28	RMA1	1.25523	Kar4	YKL107W	-2.13996
Msn4	HCH1	-1.3	Stp1	HES1	-3.07374				Met28	RPS27B	1.25335	Kar4	IRC15	-2.1577
Msn4	HSP10	-1.3	Stp1	TDH1	-4.49929				Met28	HHO1	1.25255	Kar4	NCA3	-2.17229
Msn4	ERP2	-1.3	Stp1	INO1	-5.46854				Met28	NMD3	1.25108	Kar4	YMR181C	-2.19526
Msn4	THI2	-1.3	Hcm1	HSP12	2.23472				Met28	SET6	1.24932	Kar4	PAL2	-2.24365
Msn4	RPS30a	-1.3	Hcm1	BAR1	1.81272				Met28	NUD1	1.24852	Kar4	SSE2	-2.24432
Msn4	STO1	-1.3	Hcm1	FIT2	1.36488				Met28	RPS2	1.24815	Kar4	PHR1	-2.25227
Msn4	ADE17	-1.4	Hcm1	CTT1	1.34545				Met28	NOP7	1.24688	Kar4	MND1	-2.29027
Msn4	FSH1	-1.4	Hcm1	PUS1	1.23431				Met28	RPS25A	1.24459	Kar4	SEO1	-2.3016
Msn4	CMK2	-1.5	Hcm1	GAS3	1.19347				Met28	PWP1	1.24346	Kar4	BAG7	-2.38972
Msn4	ADE1	-1.5	Hcm1	RIX7	1.16328				Met28	RPS24A	1.23996	Kar4	HXK1	-2.46742
Msn4	CWP2	-1.5	Hcm1	YGL101W	1.16301				Met28	RPS1B	1.2384	Kar4	PDR15	-2.52332
Msn4	OYE2	-1.5	Hcm1	PRY2	1.14397				Met28	HNM1	1.23787	Kar4	ORM2	-2.52575
Msn4	THI4	-1.5	Hcm1	BNA4	-1.09724				Met28	NOP4	1.23681	Kar4	OYE3	-2.53178
Msn4	YFR035C	-1.5	Hcm1	SFH1	-1.14856				Met28	TYS1	1.23675	Kar4	YGL230C	-2.57289
Msn4	RPS27a	-1.6	Hcm1	COQ11	-1.70606				Met28	ADE6	1.23675	Kar4	UGA2	-2.6511
Msn4	YLR363W-A	-1.6	Hcm1	GDH3	-1.72567				Met28	SEG2	1.23562	Kar4	SPG4	-2.66428
Msn4	TIP1	-1.7	Hcm1	BNA2	-1.88913				Met28	VTC5	1.23468	Kar4	HXT9	-2.67713
Msn4	UTR2	-1.7	Hcm1	THI73	-2.04197				Met28	RTT10	1.23158	Kar4	ICL2	-2.67842
Msn4	PMA1	-1.7	Hcm1	HSP26	-2.46302				Met28	NBA1	1.22526	Kar4	SPR1	-2.68597
Msn4	RPI1	-1.7	Kar4	FET3	2.82941				Met28	RBH1	1.22437	Kar4	OM14	-2.71149
Msn4	RPS9a	-1.7	Kar4	CWP1	2.72084				Met28	IZH4	1.22335	Kar4	YMR085W	-2.73318
Msn4	SPC1	-1.7	Kar4	MET6	2.27819				Met28	RPS0A	1.22314	Kar4	RRT6	-2.74524
Msn4	YIP3	-1.7	Kar4	HSP12	2.23472				Met28	YKL050C	1.22196	Kar4	UBI4	-2.75128
Msn4	HAC1	-1.8	Kar4	OPT1	2.06882				Met28	YHL026C	1.22193	Kar4	YMR187C	-2.76092
Msn4	YGP1	-2	Kar4	SPB1	1.97584				Met28	RPL19B	1.22071	Kar4	HBT1	-2.85388
Msn4	THI20	-2.2	Kar4	HIS4	1.86943				Met28	SMC6	1.22035	Kar4	POR1	-2.88319
Msn4	YRO2	-2.5	Kar4	GIC2	1.86717				Met28	FIR1	1.21937	Kar4	YOL131W	-2.88439
Msn4	TDH1	-2.6	Kar4	ADE17	1.8506				Met28	STU2	1.21927	Kar4	YDR344C	-2.96901
Msn4	KAR2	-2.6	Kar4	BAR1	1.81272				Met28	RPL26B	1.21886	Kar4	ATO2	-2.97507
Msn4	RPS22b	-3.1	Kar4	YNL058C	1.80554				Met28	MET13	1.21469	Kar4	MDH2	-2.98257
Msn4	THI7	-3.1	Kar4	IRC7	1.76016				Met28	YPL068C	1.21409	Kar4	YPL247C	-3.02302
Msn4	HSP26	-3.8	Kar4	DIP5	1.58794				Met28	DIG2	1.21374	Kar4	YNL194C	-3.11474
Msn4	SIN3	-7	Kar4	NFS1	1.58413				Met28	VTS1	1.21288	Kar4	WSC4	-3.11537
Mss11	PHO89	3.7189	Kar4	FRE2	1.54393				Met28	SER2	1.21274	Kar4	RCK1	-3.15716
Mss11	HXT2	3.69306	Kar4	YOL019W	1.45881				Met28	UGA1	1.21183	Kar4	SDS24	-3.34963
Mss11	PIR3	3.36425	Kar4	ILV6	1.45074				Met28	YAP6	1.20981	Kar4	NQM1	-3.40982
Mss11	GCV2	2.91239	Kar4	Ho	1.37153				Met28	ECM38	1.2088	Kar4	OSW1	-3.42556
Mss11	CAR1	2.83052	Kar4	PIR1	1.33337				Met28	ARO7	1.20761	Kar4	BNA2	-3.44776
Mss11	NDE1	2.76482	Kar4	FCY2	1.31422				Met28	YGL114W	1.20749	Kar4	GIP1	-3.5559
Mss11	CWP1	2.58596	Kar4	BAT1	1.29344				Met28	YSP3	1.20673	Kar4	ICY1	-3.56957
Mss11	FLO11	2.24748	Kar4	SUN4	1.28934				Met28	RPL23B	1.20655	Kar4	TMA10	-3.59065
Mss11	ZRT1	2.1454	Kar4	FAF1	1.27847				Met28	IDI1	1.20478	Kar4	ICS2	-3.63783
Mss11	MMP1	1.99114	Kar4	CSI2	1.27358				Met28	RPA49	1.20476	Kar4	AMS1	-3.82797
Mss11	PHO5	1.96325	Kar4	SIM1	1.237				Met28	NOG2	1.20287	Kar4	SIP18	-3.83347
Mss11	FKS3	1.86991	Kar4	SED1	1.22986				Met28	TEL2	1.20283	Kar4	YER079W	-3.84077
Mss11	YOR114W	1.83468	Kar4	ISU2	1.22973				Met28	ETT1	1.2022	Kar4	BNA1	-3.93001
Mss11	HXT4	1.82192	Kar4	KAR4	1.22332				Met28	RPA190	1.20086	Kar4	PRY1	-3.95968
Mss11	MUP1	1.81162	Kar4	PUS7	1.21752				Met28	CTS1	1.20027	Kar4	RTC2	-4.01135
Mss11	LEU2	1.75498	Kar4	ADE2	1.21429				Met28	NOP14	1.19951	Kar4	GPH1	-4.16743
Mss11	YNL194C	1.57227	Kar4	SAM3	1.21353				Met28	HFA1	1.19906	Kar4	DOG1	-4.17043
Mss11	BPH1	1.55866	Kar4	YGL101W	1.16301				Met28	ODC1	1.19689	Kar4	MET17	-4.25808
Mss11	YNL058C	1.53314	Kar4	MET17	1.15129				Met28	RPA135	1.19583	Kar4	YDL114W	-4.53891
Mss11	MET2	1.49701	Kar4	HHF1	1.15001				Met28	YLR456W	1.19523	Kar4	YNL134C	-4.58868
Mss11	UGA4	1.48864	Kar4	ADE4	1.14577				Met28	RPL21B	1.19323	Kar4	MST27	-4.7456
Mss11	MUP3	1.40641	Kar4	PRY2	1.14397				Met28	NOP12	1.19307	Kar4	GAD1	-4.83004
Mss11	PEX11	1.38978	Kar4	YIH1	1.13868				Met28	RPL6A	1.19246	Kar4	RTC3	-4.96257
Mss11	BUD5	1.36626	Kar4	ADE1	1.11261				Met28	RPL20B	1.19005	Kar4	PYK2	-5.31611
Mss11	UGA1	1.35612	Kar4	RNQ1	1.10834				Met28	ESF1	1.18989	Kar4	YFL019C	-5.80242
Mss11	GTO3	1.35436	Kar4	NOP4	1.08397				Met28	RPL40A	1.18942	Kar4	FMP45	-5.8791
Mss11	YPK2	1.35397	Kar4	STE2	1.07531				Met28	ILV1	1.18909	Kar4	XBP1	-6.2289
Mss11	FMP45	1.35364	Kar4	VHR2	1.05665				Met28	RCL1	1.18778	Kar4	ULI1	-6.38584
Mss11	FRM2	1.31702	Kar4	FCF2	1.04416				Met28	GSP1	1.18735	Kar4	THI11	-6.51419
Mss11	PRM10	1.28192	Kar4	CUP9	1.02708				Met28	AHC2	1.18573	Kar4	MF(ALPHA)1	-7.1343
Mss11	SAM3	1.28073	Kar4	ESF1	1.02175				Met28	RPL17A	1.18527	Kar4	YIL102C	-7.5214
Mss11	ATG15	1.25771	Kar4	YVH1	1.01939				Met28	DCC1	1.18453	Kar4	HSP12	-8.03477
Mss11	MSS11	1.25224	Kar4	SAM1	1.01221				Met28	FRE3	1.18367	Tup1	UIP3	10.8732
Mss11	MUM3	1.22122	Kar4	UBP7	-1.02776				Met28	YML096W	1.18339	Tup1	ENB1	10.0961
Mss11	MXR1	1.19104	Kar4	UGO1	-1.0493				Met28	FHN1	1.18276	Tup1	YOR142W-B	8.65712
Mss11	BAT1	1.18462	Kar4	YPL247C	-1.0667				Met28	NSR1	1.18245	Tup1	CUP1-1	8.05604
Mss11	BAR1	1.18308	Kar4	AUS1	-1.09386				Met28	VHR2	1.17408	Tup1	CUP1-2	8.05604
Mss11	PDR11	1.17363	Kar4	SNX4	-1.10841				Met28	IPI1	1.17202	Tup1	BSC1	6.62373
Mss11	GAL2	1.15816	Kar4	SRY1	-1.11382				Met28	RPS4A	1.17197	Tup1	FLO11	5.67732
Mss11	CTF19	1.12981	Kar4	YER079W	-1.12118				Met28	RPC40	1.17033	Tup1	YDL241W	5.38621
Mss11	RIB5	1.11405	Kar4	SAG1	-1.12476				Met28	RPL13B	1.17014	Tup1	YHL044W	5.01859
Mss11	MIF2	1.10794	Kar4	MCH4	-1.20208				Met28	ACH1	1.17007	Tup1	ZNF1	4.89391
Mss11	YLR049C	1.1035	Kar4	YKR011C	-1.21231				Met28	YAT2	1.16703	Tup1	YFL051C	4.68948
Mss11	SPC29	1.02065	Kar4	DIT1	-1.24787				Met28	YPL277C	1.16666	Tup1	HXT2	4.19301
Mss11	ESC1	1.00677	Kar4	TMN2	-1.25552				Met28	PPT2	1.16452	Tup1	FRE4	4.1803
Mss11	SCP1	-1.1	Kar4	FMP23	-1.26209				Met28	FYV7	1.16446	Tup1	VEL1	4.14692
Mss11	HXT1	-1.1	Kar4	YCR007C	-1.29267				Met28	CFD1	1.16308	Tup1	YOL014W	3.51443
Mss11	SEC72	-1.1	Kar4	PUN1	-1.29546				Met28	ECM16	1.16223	Tup1	YJL218W	3.46451
Mss11	HMO1	-1.1	Kar4	AIM10	-1.29702				Met28	TRM9	1.16055	Tup1	SUN4	3.28777
Mss11	RPL21b	-1.1	Kar4	EUG1	-1.30378				Met28	GIN4	1.15844	Tup1	MTD1	3.24307
Mss11	RPL22b	-1.1	Kar4	PDR8	-1.3097				Met28	YGK3	1.1576	Tup1	INA1	3.21509
Mss11	RPL9b	-1.1	Kar4	YLR194C	-1.33545				Met28	RPC11	1.15596	Tup1	YAL065C	3.20233
Mss11	RPS19a	-1.1	Kar4	MOH1	-1.33747				Met28	HYP2	1.15558	Tup1	GAP1	3.19123
Mss11	RPS20	-1.1	Kar4	SEO1	-1.36773				Met28	KAP123	1.15457	Tup1	RSA4	3.188
Mss11	SUI1	-1.1	Kar4	MUM3	-1.39931				Met28	UIP5	1.15419	Tup1	SPB1	3.17525
Mss11	RPS25b	-1.1	Kar4	LDS2	-1.40855				Met28	RPS1A	1.15413	Tup1	ARO9	3.13265
Mss11	YGL101W	-1.1	Kar4	YAL037W	-1.43202				Met28	BNI5	1.15385	Tup1	RRN11	3.09044
Mss11	YPL034W	-1.1	Kar4	RIM11	-1.45853				Met28	YGR283C	1.15347	Tup1	TIR1	3.02702
Mss11	UBC4	-1.2	Kar4	YNR071C	-1.46591				Met28	ECM29	1.15018	Tup1	AAC3	2.97607
Mss11	OTU1	-1.2	Kar4	YOL107W	-1.49027				Met28	NIS1	1.14497	Tup1	FCY2	2.9325
Mss11	EFB1	-1.2	Kar4	FRT2	-1.51886				Met28	MUP3	1.14195	Tup1	PRM5	2.65121
Mss11	RPS17a	-1.2	Kar4	YJL213W	-1.53139				Met28	POS5	1.14081	Tup1	GPX2	2.57137
Mss11	EFM5	-1.2	Kar4	RCN2	-1.54828				Met28	PXR1	1.13934	Tup1	MST28	2.56766
Mss11	HCH1	-1.3	Kar4	UGA2	-1.55347				Met28	YLR257W	1.13903	Tup1	KIN3	2.56759
Mss11	RPS30a	-1.3	Kar4	YGL230C	-1.63485				Met28	YLR407W	1.13732	Tup1	YLR410W-B	2.51579
Mss11	RPL29	-1.4	Kar4	VPS36	-1.63749				Met28	PTC4	1.13254	Tup1	DSE4	2.47412
Mss11	RPL42a	-1.4	Kar4	SET6	-1.63969				Met28	DAT1	1.13104	Tup1	HMG1	2.37597
Mss11	PTR2	-1.6	Kar4	YER152C	-1.65273				Met28	MAK11	1.12546	Tup1	UTP6	2.37161
Mss11	RPS27a	-1.6	Kar4	SPR1	-1.68638				Met28	MET1	1.12509	Tup1	UTR2	2.34216
Mss11	TIP1	-1.7	Kar4	YJL043W	-1.68819				Met28	PZF1	1.12497	Tup1	SKG6	2.32124
Mss11	RPS9a	-1.7	Kar4	ECM12	-1.69309				Met28	SIS2	1.1225	Tup1	MAE1	2.29638
Mss11	HAC1	-1.8	Kar4	YKL071W	-1.74734				Met28	RBG1	1.122	Tup1	MAK16	2.27328
Gal3	CAR2	3.83668	Kar4	GAS2	-1.77073				Met28	CPR6	1.12138	Tup1	ERG3	2.2579
Gal3	GCV2	2.91239	Kar4	YLR030W	-1.7729				Met28	POL30	1.1202	Tup1	IRC7	2.23753
Gal3	NDE1	2.76482	Kar4	YMR085W	-1.77645				Met28	NUF2	1.11326	Tup1	FLO5	2.2372
Gal3	CWP1	2.58596	Kar4	YNL134C	-1.77673				Met28	RPL16A	1.11267	Tup1	DHR2	2.22721
Gal3	ZRT1	2.1454	Kar4	GRE2	-1.78851				Met28	YCR041W	1.11235	Tup1	SLX9	2.20608
Gal3	YLR149C	2.13285	Kar4	ROG3	-1.83309				Met28	TOS4	1.10246	Tup1	AIM20	2.19667
Gal3	ALD6	2.07586	Kar4	BNA1	-1.83359				Met28	CTF3	1.10217	Tup1	RRP7	2.17946
Gal3	SIT1	2.07189	Kar4	ARO10	-1.84821				Met28	YLR179C	1.10217	Tup1	ADE6	2.16221
Gal3	PHO5	1.96325	Kar4	BNA2	-1.88913				Met28	DYS1	1.10187	Tup1	GUP2	2.15743
Gal3	FET3	1.75393	Kar4	GIP1	-1.90706				Met28	FET3	1.09643	Tup1	UTP15	2.1555
Gal3	IZH4	1.5654	Kar4	ULI1	-1.91792				Met28	CYK3	1.09479	Tup1	RPS14A	2.15525
Gal3	MDH2	1.34954	Kar4	ADH5	-2.0608				Met28	NUG1	1.0945	Tup1	ADE17	2.14676
Gal3	ETR1	1.21784	Kar4	IRC18	-2.08313				Met28	MRX3	1.08832	Tup1	FAA3	2.13825
Gal3	YLR049C	1.1035	Kar4	PES4	-2.1066				Met28	PRS1	1.08808	Tup1	BFR2	2.1358
Gal3	YMR181C	1.07034	Kar4	RTA1	-2.14103				Met28	SER3	1.08723	Tup1	YNL058C	2.11861
Gal3	TIS11	1.00793	Kar4	SRL4	-2.1524				Met28	CGR1	1.08661	Tup1	RBH2	2.11572
Gal3	PHD1	-1	Kar4	YOL131W	-2.26718				Met28	MPS2	1.08625	Tup1	YKR075C	2.0991
Gal3	GPX2	-1.1	Kar4	SPS1	-2.31683				Met28	YDL177C	1.08579	Tup1	SNU13	2.08906
Gal3	SCP1	-1.1	Kar4	HXT9	-2.49769				Met28	RPL6B	1.084	Tup1	CTP1	2.08088
Gal3	PCL1	-1.2	Kar4	DCG1	-2.54526				Met28	TRZ1	1.08211	Tup1	YDR316W-A	2.07548
Gal3	PTR2	-1.6	Kar4	YSW1	-2.59154				Met28	CDC7	1.07977	Tup1	YGR161C-C	2.07548
Mal33	CAR2	3.83668	Kar4	GAS4	-3.06975				Met28	URA3	1.07923	Tup1	YML131W	2.06673
Mal33	PHO89	3.7189	Kar4	STE3	-3.19711				Met28	NOP2	1.07819	Tup1	APA1	2.06441
Mal33	HXT2	3.69306	Kar4	DOG1	-3.42831				Met28	SLM3	1.07774	Tup1	DBP7	2.05365
Mal33	IMD2	3.28626	Pho4	GAP1	3.6212				Met28	THR1	1.07666	Tup1	ELO2	2.04739
Mal33	SNZ1	2.92168	Pho4	GCV2	3.36818				Met28	EXP1	1.07491	Tup1	YGR161C-D	2.03862
Mal33	FOX2	2.64651	Pho4	SIT1	3.2006				Met28	RNH201	1.07449	Tup1	UTP18	2.006
Mal33	MET6	2.59598	Pho4	FET3	2.82941				Met28	MIS1	1.07439	Tup1	UTP22	2.00558
Mal33	CWP1	2.58596	Pho4	CWP1	2.72084				Met28	YCG1	1.07159	Tup1	TRM11	2.00161
Mal33	ZRT1	2.1454	Pho4	FIT3	2.34646				Met28	ODC2	1.07159	Tup1	SSP2	2.00134
Mal33	PHO5	1.96325	Pho4	HSP12	2.23472				Met28	AHA1	1.07133	Tup1	SYO1	1.98898
Mal33	FIT3	1.94419	Pho4	FRE1	1.98765				Met28	RIB3	1.07092	Tup1	IMD2	1.97846
Mal33	LSC2	1.89616	Pho4	SER3	1.94507				Met28	XRS2	1.0698	Tup1	GDH1	1.97802
Mal33	CTR3	1.87853	Pho4	ADE17	1.8506				Met28	ECM7	1.06935	Tup1	SPE3	1.977
Mal33	MDH1	1.73255	Pho4	BAR1	1.81272				Met28	KIP1	1.06754	Tup1	UTP8	1.97599
Mal33	ARO9	1.64746	Pho4	DIP5	1.58794				Met28	UTP22	1.06638	Tup1	RPL9A	1.97168
Mal33	YHL050C	1.58769	Pho4	PHO87	1.52397				Met28	YCR016W	1.06626	Tup1	ADE13	1.96134
Mal33	MBR1	1.57239	Pho4	MUP3	1.48603				Met28	IDH1	1.06516	Tup1	ADE1	1.9611
Mal33	QDR2	1.52945	Pho4	YBR071W	1.475				Met28	UBP11	1.06423	Tup1	ATC1	1.95611
Mal33	YBL113C	1.50883	Pho4	RRP43	1.46049				Met28	NUC1	1.06278	Tup1	ACO2	1.94274
Mal33	ECM4	1.50478	Pho4	CCC2	1.4509				Met28	FEN2	1.06229	Tup1	ASN1	1.89944
Mal33	PKP2	1.45958	Pho4	ARN2	1.4194				Met28	RRP15	1.05869	Tup1	CAR1	1.89484
Mal33	YKL162C	1.45095	Pho4	MAE1	1.39908				Met28	MSH1	1.05805	Tup1	CDC39	1.87668
Mal33	MAL33	1.37544	Pho4	FIT2	1.36488				Met28	SGD1	1.05646	Tup1	DIP2	1.87343
Mal33	PUT1	1.33087	Pho4	PHO4	1.36428				Met28	PMT4	1.05441	Tup1	NOP4	1.87158
Mal33	GOR1	1.30836	Pho4	ASN1	1.35508				Met28	RPS11B	1.05417	Tup1	RIX1	1.86968
Mal33	YKL050C	1.30256	Pho4	OPT2	1.35202				Met28	GEA1	1.0507	Tup1	ADE5,7	1.86707
Mal33	SAM3	1.28073	Pho4	CTT1	1.34545				Met28	MRS6	1.05039	Tup1	PAU12	1.86479
Mal33	UBP11	1.25523	Pho4	CYC1	1.32106				Met28	MCH5	1.04836	Tup1	HCA4	1.86328
Mal33	BAR1	1.18308	Pho4	CLB1	1.31322				Met28	GLN4	1.04802	Tup1	RPL30	1.86311
Mal33	MSN4	1.18011	Pho4	HXT2	1.28836				Met28	ADE1	1.04628	Tup1	DIP5	1.85759
Mal33	IRR1	1.16805	Pho4	HTA2	1.28564				Met28	MNL2	1.04507	Tup1	ENP2	1.85172
Mal33	PET10	1.16749	Pho4	ADE2	1.21429				Met28	HCH1	1.04495	Tup1	EMW1	1.84562
Mal33	CYC3	1.15216	Pho4	SAM3	1.21353				Met28	REI1	1.04353	Tup1	EMG1	1.84318
Mal33	BAP3	1.11751	Pho4	GAS3	1.19347				Met28	VMA7	1.04211	Tup1	FTR1	1.84194
Mal33	STP2	1.11185	Pho4	YDR089W	1.16975				Met28	BCD1	1.04202	Tup1	UTP13	1.83986
Mal33	MIF2	1.10794	Pho4	CPR8	1.16924				Met28	RPS11A	1.04175	Tup1	NOP14	1.83975
Mal33	YLR049C	1.1035	Pho4	RIX7	1.16328				Met28	POP1	1.03913	Tup1	ERB1	1.83925
Mal33	PIR1	1.05875	Pho4	YGL101W	1.16301				Met28	YKR045C	1.03765	Tup1	YVH1	1.83897
Mal33	HOS3	1.03778	Pho4	CLB2	1.15929				Met28	BNI4	1.03658	Tup1	UTP25	1.83241
Mal33	YKL133C	1.03545	Pho4	HHF1	1.15001				Met28	SLP1	1.03528	Tup1	ADE4	1.83015
Mal33	IRS4	1.02321	Pho4	PRY2	1.14397				Met28	PEX30	1.03491	Tup1	RPA34	1.82916
Mal33	TIS11	1.00793	Pho4	HHT1	1.12469				Met28	GOS1	1.03341	Tup1	FRE1	1.81924
Mal33	GPM1	-1	Pho4	UTP11	1.09268				Met28	LHP1	1.03331	Tup1	RTT107	1.81887
Mal33	TSC10	-1	Pho4	FUR1	1.08967				Met28	PDS1	1.03262	Tup1	RPL12A	1.80274
Mal33	LHS1	-1	Pho4	COX5a	1.08848				Met28	EFM2	1.03227	Tup1	YCR016W	1.78582
Mal33	DPH2	-1	Pho4	SRO9	1.08081				Met28	YPK9	1.03211	Tup1	DBP8	1.76387
Mal33	HXT1	-1.1	Pho4	NOP2	1.05621				Met28	ASF1	1.03188	Tup1	TYS1	1.76217
Mal33	ERG20	-1.1	Pho4	ADE13	1.05483				Met28	TGS1	1.03062	Tup1	FUR1	1.76169
Mal33	RPL40b	-1.1	Pho4	FCF2	1.04416				Met28	ERG11	1.02995	Tup1	BRX1	1.75756
Mal33	CLU1	-1.1	Pho4	SER2	1.02899				Met28	TSR2	1.02944	Tup1	ERG6	1.75713
Mal33	PCL1	-1.2	Pho4	NMD3	1.02744				Met28	LSB6	1.0286	Tup1	SMM1	1.74298
Mal33	MTD1	-1.2	Pho4	YMR310C	1.0141				Met28	RPF2	1.02775	Tup1	FCF2	1.73993
Mal33	ADE13	-1.3	Pho4	COS1	-1.00099				Met28	NNF1	1.02456	Tup1	YBR012W-B	1.73094
Mal33	STO1	-1.3	Pho4	IML2	-1.01705				Met28	KRE33	1.02443	Tup1	RPA135	1.73093
Mal33	ADE17	-1.4	Pho4	FCY21	-1.02868				Met28	YMR31	1.02379	Tup1	HHT1	1.72798
Mal33	ADE1	-1.5	Pho4	YGP1	-1.02954				Met28	TOH1	1.0208	Tup1	RPS9A	1.72792
Mal33	PTR2	-1.6	Pho4	YJL017W	-1.06025				Met28	DUG2	1.02024	Tup1	ENP1	1.72765
Mal33	RPS27a	-1.6	Pho4	KTR2	-1.06349				Met28	HST4	1.01989	Tup1	LCP5	1.72044
Mal33	SIN3	-7	Pho4	HRI1	-1.06666				Met28	SWI5	1.01955	Tup1	NOP7	1.71907
Xbp1	POT1	4.48216	Pho4	YPL247C	-1.0667				Met28	KIN2	1.01945	Tup1	GAS3	1.71738
Xbp1	RGI2	4.26624	Pho4	GPX2	-1.07798				Met28	AIM46	1.0178	Tup1	YML018C	1.70951
Xbp1	ANS1	4.13148	Pho4	CPR6	-1.08387				Met28	NSE5	1.01556	Tup1	SOF1	1.70895
Xbp1	SFC1	4.00772	Pho4	SIA1	-1.08515				Met28	YNL165W	1.01365	Tup1	HKR1	1.70823
Xbp1	ADY2	3.93125	Pho4	AUS1	-1.09386				Met28	IZH1	1.0125	Tup1	MAK5	1.70777
Xbp1	CAR2	3.83668	Pho4	VPS29	-1.10334				Met28	IFH1	1.01221	Tup1	UTP9	1.70546
Xbp1	HXT2	3.69306	Pho4	SNX4	-1.10841				Met28	URM1	1.01192	Tup1	MAK21	1.7007
Xbp1	SRX1	3.68261	Pho4	POA1	-1.12951				Met28	RAD54	1.01133	Tup1	URA1	1.69837
Xbp1	SHC1	3.68177	Pho4	ENO2	-1.13246				Met28	YJR124C	1.00995	Tup1	FPR4	1.69326
Xbp1	MAL12	3.63625	Pho4	YGK3	-1.14157				Met28	ASE1	1.00965	Tup1	RCL1	1.68255
Xbp1	YIG1	3.43714	Pho4	UIP3	-1.14417				Met28	NOP6	1.00869	Tup1	HIS6	1.68212
Xbp1	PIR3	3.36425	Pho4	ETR1	-1.18935				Met28	ESL2	1.00838	Tup1	HGH1	1.67516
Xbp1	IMD2	3.28626	Pho4	MOG1	-1.21466				Met28	PPT1	1.00658	Tup1	DRS1	1.66486
Xbp1	SNO1	3.03071	Pho4	IMP1	-1.2297				Met28	AFT1	1.00346	Tup1	HRP1	1.66219
Xbp1	SRT1	2.96252	Pho4	MSP1	-1.23372				Met28	NSA1	1.00335	Tup1	EMC1	1.65176
Xbp1	SLZ1	2.9316	Pho4	YNL208W	-1.24532				Met28	GAT1	1.00283	Tup1	MRC1	1.6479
Xbp1	SNZ1	2.92168	Pho4	DIT1	-1.24787				Met28	RRP14	1.00266	Tup1	KCC4	1.64583
Xbp1	ICL1	2.81515	Pho4	SPO22	-1.2489				Met28	MOT1	1.00195	Tup1	ARN1	1.6369
Xbp1	NDE1	2.76482	Pho4	FMS1	-1.25119				Met28	RPS30B	1.00179	Tup1	YHB1	1.63658
Xbp1	GPH1	2.73723	Pho4	ERO1	-1.25527				Met28	WSS1	-1.00316	Tup1	RPS21A	1.63153
Xbp1	PDC6	2.69676	Pho4	FMO1	-1.25835				Met28	SHE4	-1.00365	Tup1	ESC8	1.6287
Xbp1	FOX2	2.64651	Pho4	FMP23	-1.26209				Met28	KIC1	-1.00393	Tup1	HNM1	1.62108
Xbp1	MET6	2.59598	Pho4	YPC1	-1.26255				Met28	APA2	-1.00484	Tup1	ALB1	1.61955
Xbp1	CWP1	2.58596	Pho4	DAL4	-1.26442				Met28	ICT1	-1.00485	Tup1	MYO1	1.61465
Xbp1	ACH1	2.56891	Pho4	UBX6	-1.2795				Met28	GCV1	-1.0066	Tup1	ROK1	1.6128
Xbp1	REG2	2.56122	Pho4	GYP7	-1.30305				Met28	AFG3	-1.00685	Tup1	TIR4	1.61215
Xbp1	BOP2	2.49758	Pho4	YGL117W	-1.31202				Met28	GPD2	-1.00874	Tup1	NOP15	1.60915
Xbp1	ALD4	2.4654	Pho4	YLR177W	-1.3268				Met28	SEC26	-1.0093	Tup1	DAS2	1.60681
Xbp1	VID24	2.41117	Pho4	YLR194C	-1.33545				Met28	YJL068C	-1.01077	Tup1	YMR045C	1.6055
Xbp1	PCK1	2.39414	Pho4	MAL12	-1.34411				Met28	RSM10	-1.01231	Tup1	NOP1	1.60409
Xbp1	IDP2	2.28401	Pho4	BDH2	-1.34509				Met28	SDH2	-1.01459	Tup1	NMD3	1.59915
Xbp1	FUS1	2.25925	Pho4	TOS3	-1.35007				Met28	APS1	-1.01472	Tup1	KAR4	1.59901
Xbp1	FLO11	2.24748	Pho4	DUR3	-1.35325				Met28	PPZ1	-1.01583	Tup1	RKI1	1.59828
Xbp1	PST1	2.19923	Pho4	BDH1	-1.35656				Met28	KGD1	-1.01857	Tup1	RPL37A	1.59534
Xbp1	CAT2	2.19537	Pho4	CSR2	-1.37487				Met28	ZEO1	-1.0188	Tup1	NOP12	1.5949
Xbp1	CTS1	2.12095	Pho4	OYE2	-1.39299				Met28	ARF2	-1.0192	Tup1	RPL7B	1.59447
Xbp1	SPO16	2.10998	Pho4	SIL1	-1.39813				Met28	MCO76	-1.02052	Tup1	REI1	1.59193
Xbp1	POX1	2.08204	Pho4	MUM3	-1.39931				Met28	ATP2	-1.02379	Tup1	EGT2	1.59068
Xbp1	PMA2	2.07485	Pho4	YPL014W	-1.4074				Met28	RGC1	-1.02482	Tup1	RPA49	1.59036
Xbp1	SIT1	2.07189	Pho4	THI72	-1.43753				Met28	MHP1	-1.02572	Tup1	NSA1	1.58888
Xbp1	XKS1	2.03989	Pho4	YJL171C	-1.44529				Met28	YJR012C	-1.02765	Tup1	RPL28	1.58334
Xbp1	CRC1	2.02081	Pho4	RIM11	-1.45853				Met28	GFA1	-1.02784	Tup1	RPC53	1.57962
Xbp1	TMA17	2.01812	Pho4	YNR071C	-1.46591				Met28	ISC10	-1.02789	Tup1	RPS18A	1.57671
Xbp1	REC114	1.99209	Pho4	RCN2	-1.54828				Met28	RSF1	-1.03079	Tup1	UTR4	1.57188
Xbp1	PHO5	1.96325	Pho4	ACB1	-1.55137				Met28	MAM33	-1.0313	Tup1	LTV1	1.56885
Xbp1	YNL018C	1.95893	Pho4	IRC4	-1.55187				Met28	SCP1	-1.03134	Tup1	ARO7	1.56826
Xbp1	FIT3	1.94419	Pho4	GSY1	-1.55653				Met28	YIR016W	-1.03203	Tup1	PWP1	1.56805
Xbp1	MEP2	1.90843	Pho4	TMC1	-1.56229				Met28	HUA1	-1.03256	Tup1	ECT1	1.56512
Xbp1	FIG2	1.90088	Pho4	PPE1	-1.57153				Met28	PET494	-1.03338	Tup1	MRT4	1.56476
Xbp1	LSC2	1.89616	Pho4	SYM1	-1.60519				Met28	SEC72	-1.03452	Tup1	RAD27	1.56378
Xbp1	GDB1	1.89305	Pho4	YIP3	-1.61466				Met28	VPS45	-1.03861	Tup1	LSG1	1.55751
Xbp1	SGA1	1.88433	Pho4	TIR4	-1.61742				Met28	CYS3	-1.03929	Tup1	YMR046C	1.55393
Xbp1	FKS3	1.86991	Pho4	GAL2	-1.63173				Met28	NMT1	-1.04107	Tup1	RPS15	1.55282
Xbp1	YCR050C	1.85619	Pho4	YGL230C	-1.63485				Met28	ATP5	-1.04146	Tup1	BAT2	1.55026
Xbp1	YGR053C	1.85547	Pho4	TPO2	-1.63863				Met28	RSM7	-1.04324	Tup1	DBP3	1.54958
Xbp1	PHM7	1.84002	Pho4	SET6	-1.63969				Met28	PRM4	-1.04452	Tup1	RPC10	1.54883
Xbp1	NDJ1	1.79939	Pho4	UBC11	-1.65341				Met28	MTF1	-1.04575	Tup1	PUF4	1.54825
Xbp1	EMI2	1.79446	Pho4	IMA1	-1.66502				Met28	YET3	-1.04828	Tup1	KAP122	1.54763
Xbp1	MAL32	1.77407	Pho4	YDC1	-1.67747				Met28	YOL107W	-1.04863	Tup1	SKI6	1.54734
Xbp1	FET3	1.75393	Pho4	YPL257W	-1.73486				Met28	MDM12	-1.04897	Tup1	TIP1	1.54527
Xbp1	GAP1	1.74254	Pho4	HOP1	-1.76542				Met28	REC107	-1.05053	Tup1	IQG1	1.54238
Xbp1	MDH1	1.73255	Pho4	TIR1	-1.77054				Met28	WHI4	-1.05172	Tup1	TIF6	1.53888
Xbp1	AGX1	1.73115	Pho4	SCS3	-1.77811				Met28	USA1	-1.05173	Tup1	SRO9	1.53886
Xbp1	MET10	1.72147	Pho4	ROG3	-1.83309				Met28	YKR011C	-1.05174	Tup1	SAM4	1.53767
Xbp1	AGP2	1.7193	Pho4	HXT11	-1.84675				Met28	GMC1	-1.05233	Tup1	RNT1	1.53684
Xbp1	ODC1	1.71473	Pho4	BNA2	-1.88913				Met28	PMT7	-1.05258	Tup1	RPP0	1.53596
Xbp1	PDC5	1.68905	Pho4	YDR210W	-1.89533				Met28	ADE16	-1.05325	Tup1	OTU2	1.52848
Xbp1	HXT5	1.66037	Pho4	SGA1	-1.90318				Met28	RET2	-1.05725	Tup1	RPL27A	1.52109
Xbp1	ARO9	1.64746	Pho4	DOG2	-1.91987				Met28	MRP20	-1.05813	Tup1	FAF1	1.51274
Xbp1	AMF1	1.64059	Pho4	TIR3	-1.93601				Met28	CBP4	-1.06006	Tup1	TOF1	1.50645
Xbp1	KCC4	1.6224	Pho4	SMA1	-1.95009				Met28	MDS3	-1.06223	Tup1	GBP2	1.5056
Xbp1	YBR284W	1.6171	Pho4	YHR138C	-1.96512				Met28	HOS2	-1.06456	Tup1	ZDS2	1.4985
Xbp1	YEL077C	1.59094	Pho4	YBR056W	-2.00805				Met28	THI80	-1.06475	Tup1	TUP1	1.49723
Xbp1	SUL1	1.59007	Pho4	MAL31	-2.02159				Met28	VAB2	-1.06537	Tup1	RPS19A	1.49672
Xbp1	CIT1	1.56883	Pho4	OPI3	-2.03061				Met28	SSC1	-1.06603	Tup1	RPL2B	1.49341
Xbp1	YMR085W	1.56872	Pho4	THI73	-2.04197				Met28	EUG1	-1.0672	Tup1	EFM1	1.49301
Xbp1	BIO2	1.54054	Pho4	MSH4	-2.04477				Met28	PRM10	-1.06795	Tup1	RPL34A	1.48987
Xbp1	HEF3	1.53799	Pho4	HAC1	-2.12566				Met28	MRF1	-1.06922	Tup1	ASC1	1.48842
Xbp1	YNL058C	1.53314	Pho4	FHN1	-2.1387				Met28	PNT1	-1.06942	Tup1	SRM1	1.48688
Xbp1	QDR2	1.52945	Pho4	YFL040W	-2.17236				Met28	MSK1	-1.06982	Tup1	RPL20A	1.4865
Xbp1	PEX18	1.52886	Pho4	SAP4	-2.21134				Met28	MRPL9	-1.07059	Tup1	ERG13	1.48595
Xbp1	FMP48	1.52329	Pho4	YNL092W	-2.24784				Met28	SEC9	-1.07096	Tup1	NIP1	1.48132
Xbp1	SDH1	1.5205	Pho4	YOL131W	-2.26718				Met28	NEO1	-1.07615	Tup1	FRS1	1.48053
Xbp1	LYS1	1.50894	Pho4	SPS1	-2.31683				Met28	TSA1	-1.0775	Tup1	RPL6A	1.47714
Xbp1	CIT3	1.50278	Pho4	DSF1	-2.35969				Met28	SCW4	-1.07902	Tup1	STM1	1.47375
Xbp1	PET9	1.50205	Pho4	ENO1	-2.4486				Met28	PDI1	-1.08061	Tup1	RPS17A	1.47204
Xbp1	UGA4	1.48864	Pho4	HSP26	-2.46302				Met28	ATG21	-1.08147	Tup1	ACM1	1.46604
Xbp1	YOR387C	1.47069	Pho4	HXT9	-2.49769				Met28	RTC6	-1.08618	Tup1	PPT1	1.46453
Xbp1	YFL054C	1.44409	Pho4	SOR1	-2.58455				Met28	SPF1	-1.08621	Tup1	IFH1	1.464
Xbp1	PGM2	1.43736	Pho4	TPO4	-2.63767				Met28	COX8	-1.08766	Tup1	DUS1	1.46323
Xbp1	HOF1	1.43341	Pho4	CMK2	-2.94594				Met28	FAU1	-1.0884	Tup1	THR4	1.46084
Xbp1	CYB2	1.42206	Pho4	DOG1	-3.42831				Met28	COX17	-1.08868	Tup1	NCL1	1.45652
Xbp1	PBI1	1.41134	Pho4	INO1	-5.46854				Met28	YPR127W	-1.09101	Tup1	ERG11	1.45214
Xbp1	HBN1	1.40964	Mig1	SIT1	3.2006				Met28	AIM22	-1.09103	Tup1	SDO1	1.45032
Xbp1	MUP3	1.40641	Mig1	NDE1	2.52121				Met28	DOT5	-1.09176	Tup1	RPL24A	1.44973
Xbp1	YMR144W	1.39224	Mig1	FIT3	2.34646				Met28	SAP155	-1.09368	Tup1	NOP58	1.44742
Xbp1	YNL019C	1.37952	Mig1	MET6	2.27819				Met28	PSA1	-1.09445	Tup1	GCN3	1.44439
Xbp1	XBP1	1.37748	Mig1	HSP12	2.23472				Met28	NDI1	-1.10045	Tup1	NOC3	1.44238
Xbp1	YPT53	1.37559	Mig1	NCE102	1.67273				Met28	FIG4	-1.10242	Tup1	RPS6B	1.44166
Xbp1	FRE1	1.37016	Mig1	PIR3	1.61129				Met28	RAD33	-1.10317	Tup1	RPS19B	1.44083
Xbp1	YPK2	1.35397	Mig1	AQR1	1.51102				Met28	ABP140	-1.10326	Tup1	RRP43	1.43916
Xbp1	SRL3	1.31895	Mig1	MIG1	1.50699				Met28	AIM21	-1.10407	Tup1	SPO12	1.43911
Xbp1	PTR3	1.30871	Mig1	YBR071W	1.475				Met28	COR1	-1.10529	Tup1	OLA1	1.43884
Xbp1	GOR1	1.30836	Mig1	YOL019W	1.45881				Met28	APC11	-1.10542	Tup1	GUA1	1.43604
Xbp1	SKM1	1.30257	Mig1	ARN2	1.4194				Met28	RRT8	-1.10719	Tup1	ERG8	1.42599
Xbp1	AIM17	1.29649	Mig1	FIT2	1.36488				Met28	PRE1	-1.10773	Tup1	KEL3	1.42239
Xbp1	SAP4	1.29098	Mig1	CTT1	1.34545				Met28	YBR056W	-1.11106	Tup1	UTP11	1.42183
Xbp1	QCR2	1.28719	Mig1	CYC1	1.32106				Met28	MEH1	-1.11312	Tup1	RPF2	1.41972
Xbp1	SRB8	1.28662	Mig1	HXT2	1.28836				Met28	BUG1	-1.1156	Tup1	YFR035C	1.41319
Xbp1	NGR1	1.28254	Mig1	CPR8	1.16924				Met28	YGR201C	-1.11779	Tup1	ZPR1	1.41119
Xbp1	PRM10	1.28192	Mig1	RIX7	1.16328				Met28	YER186C	-1.11828	Tup1	RPS0A	1.40606
Xbp1	ZPS1	1.27717	Mig1	ADE4	1.14577				Met28	DLD2	-1.11871	Tup1	PRI1	1.40577
Xbp1	MPC54	1.26891	Mig1	CTP1	1.07189				Met28	IPT1	-1.12116	Tup1	RPP2B	1.40539
Xbp1	LSC1	1.26218	Mig1	CUP9	1.02708				Met28	CTR2	-1.12327	Tup1	TRM112	1.40286
Xbp1	PHR1	1.25778	Mig1	YGP1	-1.02954				Met28	EHD3	-1.12331	Tup1	TRM1	1.40066
Xbp1	UBP11	1.25523	Mig1	TPS1	-1.05247				Met28	SEC12	-1.12398	Tup1	RLP7	1.40055
Xbp1	MSS11	1.25224	Mig1	CPR6	-1.08387				Met28	LTO1	-1.12669	Tup1	YMR310C	1.39721
Xbp1	OSW2	1.23859	Mig1	YER079W	-1.12118				Met28	UBR2	-1.12778	Tup1	RPL14B	1.39708
Xbp1	CHS2	1.23661	Mig1	YNL144C	-1.25271				Met28	FYV6	-1.13094	Tup1	CDC5	1.39371
Xbp1	FMP40	1.21372	Mig1	ERO1	-1.25527				Met28	ARC35	-1.13125	Tup1	SQT1	1.39093
Xbp1	BAR1	1.18308	Mig1	JEN1	-1.29078				Met28	AIM25	-1.13167	Tup1	RPS4A	1.38518
Xbp1	IMA1	1.16994	Mig1	MRK1	-1.31986				Met28	SEI1	-1.13217	Tup1	RPL8B	1.375
Xbp1	IRR1	1.16805	Mig1	GRE3	-1.33544				Met28	SNO3	-1.13532	Tup1	RPL10	1.36941
Xbp1	BUD3	1.16787	Mig1	MAL12	-1.34411				Met28	BMH2	-1.1371	Tup1	RPS8A	1.36792
Xbp1	PGS1	1.13256	Mig1	UBP11	-1.36486				Met28	NEM1	-1.13732	Tup1	PAP2	1.36048
Xbp1	BAP3	1.11751	Mig1	AIM7	-1.36713				Met28	CDC16	-1.13967	Tup1	YHR020W	1.35706
Xbp1	EMP46	1.10891	Mig1	YHR022C	-1.37102				Met28	CMC1	-1.14056	Tup1	RPL3	1.35632
Xbp1	DBF2	1.1059	Mig1	CSR2	-1.37487				Met28	GPI17	-1.14274	Tup1	RPL26B	1.35566
Xbp1	YLR049C	1.1035	Mig1	GUT1	-1.38086				Met28	YNL115C	-1.14533	Tup1	RPL6B	1.35515
Xbp1	YGR201C	1.08963	Mig1	MUM3	-1.39931				Met28	YDR338C	-1.14569	Tup1	RPS0B	1.35505
Xbp1	ARG7	1.08884	Mig1	STP4	-1.42157				Met28	MSB2	-1.14586	Tup1	NOP9	1.35368
Xbp1	ALK2	1.08594	Mig1	PET117	-1.49377				Met28	IAI11	-1.14856	Tup1	RPS5	1.35123
Xbp1	YMD8	1.08417	Mig1	GSY1	-1.55653				Met28	VPS25	-1.1502	Tup1	VBA4	1.34992
Xbp1	TSA2	1.07825	Mig1	GAL2	-1.63173				Met28	CSR1	-1.15362	Tup1	PDS5	1.34824
Xbp1	YMR181C	1.07034	Mig1	GAL1	-1.66237				Met28	GPA2	-1.15487	Tup1	URA5	1.34714
Xbp1	CTF3	1.0651	Mig1	IMA1	-1.66502				Met28	BOL3	-1.15666	Tup1	MAK11	1.34535
Xbp1	YGL039W	1.06448	Mig1	YMR085W	-1.77645				Met28	TDA5	-1.15796	Tup1	WRS1	1.34482
Xbp1	PIR1	1.05875	Mig1	GRE2	-1.78851				Met28	MAG1	-1.15826	Tup1	RPS1B	1.34227
Xbp1	CWH43	1.03906	Mig1	BNA1	-1.83359				Met28	PMT5	-1.1588	Tup1	ARE1	1.3392
Xbp1	GCY1	1.03737	Mig1	EMI2	-1.83561				Met28	YIL161W	-1.15975	Tup1	FAA4	1.33878
Xbp1	YKL133C	1.03545	Mig1	ARO10	-1.84821				Met28	ISF1	-1.1599	Tup1	MCM6	1.33865
Xbp1	ECM38	1.01752	Mig1	DOG2	-1.91987				Met28	AQY1	-1.16069	Tup1	MTR3	1.33575
Xbp1	DAL1	1.0162	Mig1	YBR056W	-2.00805				Met28	THI7	-1.1658	Tup1	RPL15A	1.33522
Xbp1	TIS11	1.00793	Mig1	MAL31	-2.02159				Met28	NGL1	-1.16739	Tup1	RPL1B	1.33442
Xbp1	GRE3	-1	Mig1	IMA2	-2.04734				Met28	ATP1	-1.16868	Tup1	PAT1	1.33285
Xbp1	PMT1	-1	Mig1	DSF1	-2.35969				Met28	YDR306C	-1.17468	Tup1	PLB2	1.32939
Xbp1	PMT2	-1	Mig1	IMA3	-2.36577				Met28	TFC6	-1.17536	Tup1	CDC21	1.32923
Xbp1	GPM1	-1	Mig1	ENO1	-2.4486				Met28	HTB1	-1.17747	Tup1	SAP185	1.32647
Xbp1	ERG11	-1	Mig1	HSP26	-2.46302				Met28	ERV29	-1.17765	Tup1	NUC1	1.31857
Xbp1	ERO1	-1	Mig1	TDH1	-4.49929				Met28	YTH1	-1.1784	Tup1	RPL34B	1.31648
Xbp1	LHS1	-1	Mig1	INO1	-5.46854				Met28	GDI1	-1.18022	Tup1	CDC50	1.31239
Xbp1	DPM1	-1	Tup1	GAP1	3.6212				Met28	VHS1	-1.18115	Tup1	GSP1	1.30968
Xbp1	YJL171C	-1	Tup1	CWP1	2.72084				Met28	RRF1	-1.18131	Tup1	RRB1	1.30951
Xbp1	GPX2	-1.1	Tup1	FIT3	2.34646				Met28	BSD2	-1.18239	Tup1	CYC1	1.30821
Xbp1	HXT1	-1.1	Tup1	HSP12	2.23472				Met28	SEC53	-1.18408	Tup1	URK1	1.30425
Xbp1	ENO1	-1.1	Tup1	OPT1	2.06882				Met28	PIB1	-1.1852	Tup1	RPL11A	1.30382
Xbp1	ERG26	-1.1	Tup1	RRP7	1.998				Met28	GRX4	-1.18708	Tup1	NSR1	1.30376
Xbp1	GRE2	-1.1	Tup1	FRE1	1.98765				Met28	SEC59	-1.18765	Tup1	RPL13B	1.30196
Xbp1	SCJ1	-1.1	Tup1	SPB1	1.97584				Met28	HRD3	-1.18801	Tup1	RPB9	1.30152
Xbp1	PDC1	-1.1	Tup1	FTR1	1.88254				Met28	GYP7	-1.18894	Tup1	RPL12B	1.29952
Xbp1	LIP5	-1.1	Tup1	HIS4	1.86943				Met28	YRO2	-1.19088	Tup1	ILV6	1.29672
Xbp1	YLR257W	-1.1	Tup1	ADE17	1.8506				Met28	JLP1	-1.19423	Tup1	NEW1	1.29578
Xbp1	PCL1	-1.2	Tup1	MUP1	1.8239				Met28	AIM17	-1.1953	Tup1	VHR2	1.29516
Xbp1	SSA2	-1.2	Tup1	BAR1	1.81272				Met28	CRN1	-1.19899	Tup1	URA4	1.29484
Xbp1	RET3	-1.2	Tup1	CAR1	1.80795				Met28	UBX3	-1.20116	Tup1	RPG1	1.29439
Xbp1	SCW4	-1.3	Tup1	YNL058C	1.80554				Met28	HAT1	-1.20147	Tup1	PHO87	1.28253
Xbp1	DOG1	-1.3	Tup1	IRC7	1.76016				Met28	SAM50	-1.20194	Tup1	YOR385W	1.28155
Xbp1	ENO2	-1.3	Tup1	GDH1	1.71052				Met28	YDC1	-1.20315	Tup1	TIF5	1.28038
Xbp1	FBA1	-1.3	Tup1	RSA4	1.69503				Met28	GLD1	-1.20443	Tup1	NUG1	1.28037
Xbp1	MPD1	-1.3	Tup1	TUP1	1.6176				Met28	GPI14	-1.2056	Tup1	ELP2	1.27973
Xbp1	MCD4	-1.4	Tup1	THR4	1.60707				Met28	YER079W	-1.20602	Tup1	VTC5	1.27827
Xbp1	ADE17	-1.4	Tup1	DIP5	1.58794				Met28	ECL1	-1.21184	Tup1	RPS6A	1.27669
Xbp1	SIL1	-1.4	Tup1	BAP3	1.58122				Met28	MSS1	-1.21389	Tup1	ELO3	1.2752
Xbp1	FSH1	-1.4	Tup1	PHO87	1.52397				Met28	TIM9	-1.21511	Tup1	KAR1	1.2742
Xbp1	CMK2	-1.5	Tup1	YHR033W	1.50866				Met28	YDR476C	-1.2173	Tup1	RPP2A	1.27178
Xbp1	ADE1	-1.5	Tup1	PUT4	1.49839				Met28	OM14	-1.21858	Tup1	RPL17A	1.26556
Xbp1	CWP2	-1.5	Tup1	MUP3	1.48603				Met28	ABF2	-1.22086	Tup1	FIT2	1.26187
Xbp1	OYE2	-1.5	Tup1	YBR071W	1.475				Met28	SEC66	-1.22146	Tup1	CGR1	1.25833
Xbp1	THI4	-1.5	Tup1	ELO2	1.46394				Met28	ATP4	-1.22162	Tup1	RPL19A	1.25784
Xbp1	YDR524C-B	-1.6	Tup1	RRP43	1.46049				Met28	TPO5	-1.22273	Tup1	HIS7	1.25489
Xbp1	TIP1	-1.7	Tup1	YOL019W	1.45881				Met28	RSM25	-1.22406	Tup1	RBG1	1.25291
Xbp1	UTR2	-1.7	Tup1	FEN2	1.451				Met28	FAR8	-1.22451	Tup1	MIG1	1.2469
Xbp1	MRH1	-1.7	Tup1	ILV6	1.45074				Met28	STF1	-1.22688	Tup1	RPL19B	1.24632
Xbp1	PMA1	-1.7	Tup1	YCR016W	1.42327				Met28	MIC27	-1.23625	Tup1	RPL16B	1.24533
Xbp1	SPC1	-1.7	Tup1	ILV2	1.41487				Met28	OPY1	-1.23653	Tup1	CLA4	1.23959
Xbp1	HAC1	-1.8	Tup1	MAE1	1.39908				Met28	MOT3	-1.23732	Tup1	SUI3	1.23825
Xbp1	CCW12	-1.9	Tup1	EMC1	1.39583				Met28	HRK1	-1.23742	Tup1	GAR1	1.23388
Xbp1	YGP1	-2	Tup1	FIT2	1.36488				Met28	GGA1	-1.23765	Tup1	HPM1	1.23378
Xbp1	THI73	-2	Tup1	ASN1	1.35508				Met28	SEC61	-1.2404	Tup1	NOP56	1.2318
Xbp1	YRO2	-2.5	Tup1	CDC50	1.33572				Met28	FSH3	-1.24495	Tup1	RPS4B	1.23142
Xbp1	TDH1	-2.6	Tup1	HMX1	1.32688				Met28	PEP12	-1.24837	Tup1	CHA1	1.22999
Xbp1	KAR2	-2.6	Tup1	CYC1	1.32106				Met28	MRPL38	-1.25206	Tup1	MES1	1.2288
Xbp1	HSP26	-3.8	Tup1	FCY2	1.31422				Met28	YFR045W	-1.25422	Tup1	RPL4B	1.22639
Usv1	ADY2	3.93125	Tup1	CLB1	1.31322				Met28	LOA1	-1.25424	Tup1	HTL1	1.22586
Usv1	ACS1	1.80831	Tup1	EXG1	1.31131				Met28	YJR154W	-1.25733	Tup1	MCM2	1.22427
Usv1	VHT1	1.76496	Tup1	MTD1	1.30692				Met28	MRPS12	-1.26094	Tup1	ARD1	1.21844
Usv1	YMR085W	1.56872	Tup1	HRP1	1.2992				Met28	LSP1	-1.26109	Tup1	HMS1	1.2175
Usv1	HEF3	1.53799	Tup1	BAT1	1.29344				Met28	APN2	-1.26124	Tup1	GCD1	1.21733
Usv1	USV1	1.47994	Tup1	SUN4	1.28934				Met28	PMT1	-1.26404	Tup1	RRN3	1.21144
Usv1	ERO1	-1	Tup1	HXT2	1.28836				Met28	MGR1	-1.26416	Tup1	PPM2	1.20637
Cat8	POT1	4.48216	Tup1	HTA2	1.28564				Met28	SEM1	-1.26535	Tup1	RPL32	1.20586
Cat8	SFC1	4.00772	Tup1	CDC39	1.28178				Met28	GRX8	-1.2666	Tup1	LYS4	1.20204
Cat8	ADY2	3.93125	Tup1	FAF1	1.27847				Met28	PMC1	-1.26668	Tup1	PRT1	1.20046
Cat8	SIP4	3.75814	Tup1	PAT1	1.27424				Met28	NUS1	-1.26745	Tup1	YDR341C	1.1979
Cat8	PHO89	3.7189	Tup1	CSI2	1.27358				Met28	YSC83	-1.27125	Tup1	MDM20	1.19618
Cat8	ICL1	2.81515	Tup1	RSM10	1.2714				Met28	YRM1	-1.27564	Tup1	RPL2A	1.19598
Cat8	MEK1	2.65422	Tup1	REX2	1.26229				Met28	MPH1	-1.27587	Tup1	GCN1	1.19549
Cat8	FOX2	2.64651	Tup1	HIS7	1.25391				Met28	COX16	-1.27696	Tup1	CBF5	1.19477
Cat8	CWP1	2.58596	Tup1	SIM1	1.237				Met28	AIM29	-1.2806	Tup1	KAP123	1.19451
Cat8	ACH1	2.56891	Tup1	AIM20	1.22543				Met28	ZRG17	-1.28161	Tup1	RNA1	1.19237
Cat8	REG2	2.56122	Tup1	KAR4	1.22332				Met28	COQ1	-1.28334	Tup1	TRM13	1.19112
Cat8	ALP1	2.50371	Tup1	PUS7	1.21752				Met28	ERD2	-1.2839	Tup1	YLR287C	1.18962
Cat8	BOP2	2.49758	Tup1	SAM3	1.21353				Met28	BIR1	-1.28673	Tup1	FCF1	1.18755
Cat8	ALD4	2.4654	Tup1	GAS3	1.19347				Met28	PTC7	-1.28682	Tup1	TRM8	1.18534
Cat8	ICL2	2.4449	Tup1	PET9	1.17528				Met28	RSM27	-1.29421	Tup1	YHM2	1.18511
Cat8	PCK1	2.39414	Tup1	PET18	1.17407				Met28	YOR015W	-1.29477	Tup1	YGR054W	1.18467
Cat8	IDP2	2.28401	Tup1	YDR089W	1.16975				Met28	IGO1	-1.29813	Tup1	YGR210C	1.17832
Cat8	CAT2	2.19537	Tup1	LYP1	1.16188				Met28	MRPL50	-1.29848	Tup1	TIR2	1.1753
Cat8	ZRT1	2.1454	Tup1	ADE4	1.14577				Met28	SPT2	-1.29923	Tup1	RPL16A	1.17493
Cat8	POX1	2.08204	Tup1	PRY2	1.14397				Met28	FYV4	-1.30353	Tup1	DUT1	1.17364
Cat8	ALD6	2.07586	Tup1	LDB16	1.1338				Met28	CLN1	-1.30552	Tup1	UTP5	1.1675
Cat8	CRC1	2.02081	Tup1	ZPR1	1.13332				Met28	SIS1	-1.30593	Tup1	RPS1A	1.16734
Cat8	MET17	2.00654	Tup1	ILV3	1.13012				Met28	UBC7	-1.3075	Tup1	YSP2	1.16556
Cat8	PHO5	1.96325	Tup1	HHT1	1.12469				Met28	VPS5	-1.30856	Tup1	BAS1	1.16262
Cat8	FAT3	1.82453	Tup1	PGD1	1.117				Met28	CBP3	-1.30891	Tup1	GIR2	1.15837
Cat8	KNH1	1.81083	Tup1	ADE1	1.11261				Met28	EDC2	-1.30998	Tup1	PEX25	1.15606
Cat8	ACS1	1.80831	Tup1	RNQ1	1.10834				Met28	ATP17	-1.31467	Tup1	PRS3	1.15594
Cat8	JEN1	1.78117	Tup1	NSA1	1.10283				Met28	MRPL8	-1.31921	Tup1	ZUO1	1.15563
Cat8	LEU2	1.75498	Tup1	NOP14	1.09752				Met28	YNL054W-B	-1.31978	Tup1	PRO1	1.15396
Cat8	GAP1	1.74254	Tup1	HCM1	1.09602				Met28	RGD2	-1.32147	Tup1	IPL1	1.15262
Cat8	ODC1	1.71473	Tup1	FAA4	1.0959				Met28	FUN26	-1.32413	Tup1	AFG2	1.15257
Cat8	CAT8	1.67999	Tup1	UTP11	1.09268				Met28	TNA1	-1.32473	Tup1	TRM7	1.15223
Cat8	ARO9	1.64746	Tup1	FUR1	1.08967				Met28	HUT1	-1.32601	Tup1	SKT5	1.15197
Cat8	FDH1	1.60564	Tup1	EGT2	1.08817				Met28	POR1	-1.32857	Tup1	NUP100	1.15085
Cat8	YNL194C	1.57227	Tup1	NOP4	1.08397				Met28	YJL107C	-1.33075	Tup1	ERG25	1.14927
Cat8	SDH1	1.5205	Tup1	SRO9	1.08081				Met28	ALG12	-1.33211	Tup1	URM1	1.14615
Cat8	MET2	1.49701	Tup1	MAK21	1.07634				Met28	YPR053C	-1.33224	Tup1	ILV2	1.14597
Cat8	GDH2	1.46367	Tup1	DIS3	1.07626				Met28	RIE1	-1.33441	Tup1	RRP6	1.14331
Cat8	CYB2	1.42206	Tup1	SQT1	1.07584				Met28	PCL7	-1.33513	Tup1	HYP2	1.13713
Cat8	YJL045W	1.42118	Tup1	STE2	1.07531				Met28	OYE2	-1.34114	Tup1	PSE1	1.13296
Cat8	OM14	1.37622	Tup1	CTP1	1.07189				Met28	YOL057W	-1.34119	Tup1	PRS1	1.13256
Cat8	FMP45	1.35364	Tup1	NOP7	1.06613				Met28	BAG7	-1.34167	Tup1	EFT1	1.13238
Cat8	MDH2	1.34954	Tup1	PWP1	1.06005				Met28	RCN2	-1.34395	Tup1	YHR127W	1.13217
Cat8	AIM17	1.29649	Tup1	VHR2	1.05665				Met28	QCR10	-1.35287	Tup1	TIF4631	1.13055
Cat8	SAP4	1.29098	Tup1	ADE13	1.05483				Met28	PET100	-1.35469	Tup1	EMP70	1.12937
Cat8	ZPS1	1.27717	Tup1	FCF2	1.04416				Met28	NKP1	-1.3549	Tup1	HCM1	1.12718
Cat8	FRE2	1.25445	Tup1	GAR1	1.03231				Met28	YPL162C	-1.35534	Tup1	SWD2	1.12515
Cat8	YSP3	1.22405	Tup1	ADE6	1.03027				Met28	STE6	-1.36033	Tup1	MIS1	1.1247
Cat8	BAT1	1.18462	Tup1	LRE1	1.02922				Met28	ALG6	-1.36078	Tup1	RPS2	1.12404
Cat8	BAR1	1.18308	Tup1	NMD3	1.02744				Met28	ATG8	-1.36232	Tup1	STP22	1.12345
Cat8	CUR1	1.14534	Tup1	CUP9	1.02708				Met28	YNK1	-1.36355	Tup1	GCD11	1.12292
Cat8	AGP1	1.1295	Tup1	LSG1	1.02091				Met28	KEG1	-1.36764	Tup1	SCH9	1.12141
Cat8	ATO3	1.11143	Tup1	YVH1	1.01939				Met28	OXA1	-1.36881	Tup1	RLF2	1.12123
Cat8	GUT1	1.03995	Tup1	DBP3	1.01808				Met28	YMR320W	-1.37255	Tup1	ERG12	1.12119
Cat8	HNM1	-1.4	Tup1	MTR3	1.01703				Met28	MPC1	-1.37427	Tup1	TRL1	1.1209
Cat8	PTR2	-1.6	Tup1	ALB1	1.01638				Met28	YLR149C	-1.37954	Tup1	VAS1	1.12039
Cat8	TIP1	-1.7	Tup1	LTV1	1.01622				Met28	PAR32	-1.3797	Tup1	DYS1	1.11767
Cat8	UTR2	-1.7	Tup1	YMR310C	1.0141				Met28	CMK1	-1.381	Tup1	ERG26	1.11752
Cat8	YRO2	-2.5	Tup1	ALD4	1.0136				Met28	MGT1	-1.38329	Tup1	FET4	1.11612
Cat8	KAR2	-2.6	Tup1	SAM1	1.01221				Met28	BFR1	-1.38389	Tup1	TIF34	1.11571
Mth1	NDE1	2.76482	Tup1	DIP2	1.01111				Met28	CLP1	-1.38465	Tup1	RVB2	1.11499
Mth1	PHO5	1.96325	Tup1	KIN3	1.00537				Met28	IWR1	-1.38466	Tup1	RPP1A	1.11391
Mth1	SAF1	1.38786	Tup1	PRE3	-1.00158				Met28	ERP2	-1.38905	Tup1	SPH1	1.11174
Mth1	YPK2	1.35397	Tup1	KKQ8	-1.0107				Met28	RET3	-1.38951	Tup1	ARO4	1.10869
Mth1	STP22	1.31729	Tup1	URA8	-1.01975				Met28	MRPL16	-1.38981	Tup1	RPL17B	1.10815
Mth1	PTR3	1.30871	Tup1	LHS1	-1.0219				Met28	GTR2	-1.39317	Tup1	DIS3	1.10652
Mth1	ETR1	1.21784	Tup1	IRC6	-1.02625				Met28	KRE1	-1.39534	Tup1	RBA50	1.10562
Mth1	TOP2	1.18532	Tup1	UBP7	-1.02776				Met28	ATP11	-1.39579	Tup1	ACL4	1.10179
Mth1	RIB5	1.11405	Tup1	FCY21	-1.02868				Met28	YJR115W	-1.40108	Tup1	YKR045C	1.10136
Mth1	YLR049C	1.1035	Tup1	COX11	-1.03148				Met28	THI74	-1.40199	Tup1	RPL24B	1.09972
Mth1	ISU1	1.05101	Tup1	DIA4	-1.03289				Met28	IFM1	-1.40655	Tup1	BCP1	1.09838
Mth1	TSC10	-1	Tup1	VPS8	-1.04583				Met28	MRPL3	-1.41028	Tup1	RPC37	1.09502
Mth1	SPT15	-1	Tup1	PPZ2	-1.05023				Met28	YOR238W	-1.41074	Tup1	SNU66	1.09478
Mth1	GPX2	-1.1	Tup1	YMR210W	-1.05533				Met28	ATP3	-1.42021	Tup1	RPS7B	1.09121
Mth1	SCP1	-1.1	Tup1	YET3	-1.0625				Met28	GAL83	-1.42091	Tup1	OPT1	1.09056
Mth1	ERG20	-1.1	Tup1	KTR2	-1.06349				Met28	MSN1	-1.42303	Tup1	MCD1	1.09003
Mth1	SEC72	-1.1	Tup1	RCN1	-1.06914				Met28	YAK1	-1.42406	Tup1	MNN11	1.08997
Mth1	RPL22b	-1.1	Tup1	GPX2	-1.07798				Met28	MRPL23	-1.42457	Tup1	RPC17	1.08951
Mth1	HRI1	-1.1	Tup1	YPR1	-1.08014				Met28	AGP3	-1.42475	Tup1	ATO3	1.08868
Mth1	YGL101W	-1.1	Tup1	AUS1	-1.09386				Met28	COA6	-1.42509	Tup1	PRS4	1.08813
Mth1	PCL1	-1.2	Tup1	BNA4	-1.09724				Met28	CSI1	-1.42581	Tup1	RPL13A	1.08054
Mth1	MTD1	-1.2	Tup1	VPS29	-1.10334				Met28	YFH7	-1.43475	Tup1	YML082W	1.07157
Mth1	NMT1	-1.3	Tup1	SNX4	-1.10841				Met28	SDH4	-1.43781	Tup1	SUP35	1.07133
Mth1	ADE1	-1.5	Tup1	MYO3	-1.12289				Met28	SSA4	-1.43974	Tup1	ADE8	1.07062
Mth1	YRO2	-2.5	Tup1	ENO2	-1.13246				Met28	SEC23	-1.43982	Tup1	YAR068W	1.06888
Met28	PDC6	2.69676	Tup1	AIM23	-1.13716				Met28	SDS24	-1.44527	Tup1	LDB16	1.06753
Met28	MET6	2.59598	Tup1	PLB1	-1.13724				Met28	SCJ1	-1.44661	Tup1	RPS28B	1.06439
Met28	CWP1	2.58596	Tup1	UIP3	-1.14417				Met28	ATG34	-1.44814	Tup1	EFM2	1.06363
Met28	TMA10	2.40195	Tup1	GDB1	-1.15				Met28	PIL1	-1.44876	Tup1	PUT1	1.0634
Met28	LEE1	2.331	Tup1	RRF1	-1.15312				Met28	YIL108W	-1.45013	Tup1	TOH1	1.05978
Met28	ZRT1	2.1454	Tup1	SNX41	-1.16326				Met28	MIC26	-1.4532	Tup1	GCN20	1.05773
Met28	MET28	2.14144	Tup1	SUL2	-1.16363				Met28	GRE3	-1.45527	Tup1	ARC1	1.05587
Met28	ALD6	2.07586	Tup1	NRT1	-1.17018				Met28	ASG7	-1.45886	Tup1	DED81	1.05519
Met28	MET17	2.00654	Tup1	PGM2	-1.18244				Met28	RSM19	-1.46503	Tup1	BRR2	1.05504
Met28	MMP1	1.99114	Tup1	SSA2	-1.20163				Met28	HSP104	-1.46673	Tup1	ETT1	1.05303
Met28	PHO5	1.96325	Tup1	MCH4	-1.20208				Met28	PPQ1	-1.46813	Tup1	SSZ1	1.05276
Met28	GDB1	1.89305	Tup1	HCS1	-1.20391				Met28	OCH1	-1.46975	Tup1	SES1	1.05086
Met28	MUP1	1.81162	Tup1	YPS6	-1.2052				Met28	NNR2	-1.47399	Tup1	ALA1	1.04917
Met28	EMI2	1.79446	Tup1	STI1	-1.21671				Met28	PKP1	-1.47907	Tup1	RVB1	1.04558
Met28	VHT1	1.76496	Tup1	VID28	-1.22433				Met28	SAM37	-1.47954	Tup1	HIP1	1.04501
Met28	MET10	1.72147	Tup1	COQ1	-1.22792				Met28	HDA2	-1.48098	Tup1	CDC10	1.0434
Met28	STR3	1.61365	Tup1	MSP1	-1.23372				Met28	NYV1	-1.48222	Tup1	TMN3	1.04272
Met28	SUL1	1.59007	Tup1	YNL208W	-1.24532				Met28	POP7	-1.48548	Tup1	YJR124C	1.03145
Met28	IZH4	1.5654	Tup1	DIT1	-1.24787				Met28	NUR1	-1.48685	Tup1	LYS20	1.02891
Met28	MET2	1.49701	Tup1	YIL108W	-1.25396				Met28	SNZ2	-1.49097	Tup1	RPS14B	1.02728
Met28	MUP3	1.40641	Tup1	ERO1	-1.25527				Met28	SEC63	-1.49113	Tup1	GDA1	1.02537
Met28	YMR144W	1.39224	Tup1	TMN2	-1.25552				Met28	SGA1	-1.49667	Tup1	SCP160	1.02335
Met28	SAM3	1.28073	Tup1	FMP23	-1.26209				Met28	YIP3	-1.50972	Tup1	ERG7	1.02146
Met28	MXR1	1.19104	Tup1	YPC1	-1.26255				Met28	PMT2	-1.51289	Tup1	ZRC1	1.02122
Met28	YLR049C	1.1035	Tup1	CPS1	-1.26994				Met28	PRM5	-1.51589	Tup1	YCR090C	1.02108
Met28	PHD1	-1	Tup1	VID30	-1.29419				Met28	PHO80	-1.52165	Tup1	SST2	1.02044
Met28	GPX2	-1.1	Tup1	PUN1	-1.29546				Met28	COX18	-1.52317	Tup1	RPS23A	1.0202
Met28	SCP1	-1.1	Tup1	MSF1	-1.30498				Met28	RCF1	-1.52424	Tup1	DCD1	1.01897
Met28	PCL1	-1.2	Tup1	YGR161W-B	-1.33516				Met28	MSM1	-1.52612	Tup1	FOB1	1.01793
Met28	YDR210W	-1.2	Tup1	YLR194C	-1.33545				Met28	KNS1	-1.54001	Tup1	RNR1	1.01313
Sip4	SFC1	4.00772	Tup1	RRI2	-1.33618				Met28	MRP8	-1.54525	Tup1	HEL2	1.01068
Sip4	SIP4	3.75814	Tup1	MAL12	-1.34411				Met28	MRPS8	-1.54714	Tup1	RRP45	1.00964
Sip4	NDE1	2.76482	Tup1	BDH2	-1.34509				Met28	ATP23	-1.54847	Tup1	LYS9	1.00894
Sip4	PCK1	2.39414	Tup1	COS9	-1.35045				Met28	BMH1	-1.54849	Tup1	MID2	1.00222
Sip4	CAT2	2.19537	Tup1	DUR3	-1.35325				Met28	SNX4	-1.55352	Tup1	MYO3	-1.00023
Sip4	CRC1	2.02081	Tup1	URH1	-1.35353				Met28	TYE7	-1.55699	Tup1	MET5	-1.00149
Sip4	REC114	1.99209	Tup1	YHR022C	-1.37102				Met28	MDE1	-1.56059	Tup1	RNH1	-1.00315
Sip4	YDL199C	1.84805	Tup1	YCT1	-1.37161				Met28	MRP10	-1.56443	Tup1	WTM1	-1.00328
Sip4	ACS1	1.80831	Tup1	CSR2	-1.37487				Met28	PMT3	-1.56823	Tup1	HSP78	-1.00755
Sip4	NDJ1	1.79939	Tup1	GUT1	-1.38086				Met28	PMI40	-1.56918	Tup1	AQY3	-1.00797
Sip4	YNR064C	1.74121	Tup1	RAV2	-1.38139				Met28	ACB1	-1.56934	Tup1	DIA4	-1.00854
Sip4	AZR1	1.37398	Tup1	OYE2	-1.39299				Met28	GCR1	-1.57508	Tup1	PMT2	-1.01567
Sip4	FRE1	1.37016	Tup1	URA10	-1.40108				Met28	RCN1	-1.57816	Tup1	YKL023W	-1.02253
Sip4	NQM1	1.35302	Tup1	YIL055C	-1.40557				Met28	YNR014W	-1.58522	Tup1	SWD1	-1.02939
Sip4	SKM1	1.30257	Tup1	STP4	-1.42157				Met28	HRD1	-1.58766	Tup1	NNF1	-1.03102
Sip4	ETR1	1.21784	Tup1	THI72	-1.43753				Met28	YHR138C	-1.59018	Tup1	TUL1	-1.03309
Sip4	YLR049C	1.1035	Tup1	YPS1	-1.4422				Met28	CWP1	-1.59162	Tup1	ATG17	-1.03573
Sip4	TSC10	-1	Tup1	YJL171C	-1.44529				Met28	GLO1	-1.59683	Tup1	LAG2	-1.04406
Sip4	GPX2	-1.1	Tup1	TPK1	-1.44885				Met28	PDL32	-1.60805	Tup1	PRP45	-1.04407
Sip4	SEC72	-1.1	Tup1	YOR385W	-1.46175				Met28	INO4	-1.60834	Tup1	GUT2	-1.04736
Sip4	HMO1	-1.1	Tup1	CIT3	-1.46261				Met28	URA10	-1.60949	Tup1	FBP1	-1.04785
Sip4	PCL1	-1.2	Tup1	YNR071C	-1.46591				Met28	MSS11	-1.61345	Tup1	QCR8	-1.05116
Sip4	ADE1	-1.5	Tup1	ATG5	-1.50548				Met28	UBI4	-1.61609	Tup1	ATP1	-1.05628
Sip4	OYE2	-1.5	Tup1	YER187W	-1.51214				Met28	RCI37	-1.61797	Tup1	BIO2	-1.05969
Sip4	TIP1	-1.7	Tup1	ACB1	-1.55137				Met28	SEC62	-1.61943	Tup1	AIM41	-1.06539
Sip4	YRO2	-2.5	Tup1	IRC4	-1.55187				Met28	SOH1	-1.61944	Tup1	RTS3	-1.06589
			Tup1	UGA2	-1.55347				Met28	FYV10	-1.62434	Tup1	HUA1	-1.07082
			Tup1	GSY1	-1.55653				Met28	SWS2	-1.62552	Tup1	LIP2	-1.07129
			Tup1	YHI9	-1.56372				Met28	FUN19	-1.62711	Tup1	YOR019W	-1.0731
			Tup1	YOR111W	-1.57459				Met28	INH1	-1.62779	Tup1	MDM31	-1.0756
			Tup1	REV7	-1.57839				Met28	YPR003C	-1.62898	Tup1	TYE7	-1.07646
			Tup1	YIP3	-1.61466				Met28	YET1	-1.6319	Tup1	STP2	-1.08257
			Tup1	TIR4	-1.61742				Met28	CDC37	-1.63655	Tup1	FRE7	-1.08486
			Tup1	DIT2	-1.64574				Met28	CRG1	-1.63959	Tup1	UBX3	-1.09073
			Tup1	YER152C	-1.65273				Met28	YNL144C	-1.64271	Tup1	ERV29	-1.09129
			Tup1	IMA1	-1.66502				Met28	PRY2	-1.65199	Tup1	CRD1	-1.09232
			Tup1	ECM12	-1.69309				Met28	EHT1	-1.6554	Tup1	NRT1	-1.0928
			Tup1	COQ11	-1.70606				Met28	MIC19	-1.66555	Tup1	AGA1	-1.10102
			Tup1	PMT3	-1.70844				Met28	STE2	-1.66967	Tup1	CYC2	-1.10206
			Tup1	YKL071W	-1.74734				Met28	MRPL44	-1.6828	Tup1	ALG6	-1.11175
			Tup1	THI20	-1.7689				Met28	APQ12	-1.68349	Tup1	BCY1	-1.11706
			Tup1	TIR1	-1.77054				Met28	BNA1	-1.68355	Tup1	PET111	-1.11768
			Tup1	GAS2	-1.77073				Met28	CWC23	-1.68557	Tup1	PIB1	-1.1196
			Tup1	YMR085W	-1.77645				Met28	DPM1	-1.68579	Tup1	PCL10	-1.12439
			Tup1	YNL134C	-1.77673				Met28	YHR112C	-1.69192	Tup1	PAU5	-1.1275
			Tup1	GRE2	-1.78851				Met28	STB3	-1.69234	Tup1	MPC3	-1.13082
			Tup1	EMI2	-1.83561				Met28	MRPL35	-1.69535	Tup1	MSK1	-1.13235
			Tup1	HXT11	-1.84675				Met28	CBP6	-1.69874	Tup1	MIT1	-1.13517
			Tup1	ARO10	-1.84821				Met28	YCR006C	-1.69893	Tup1	BIT2	-1.13765
			Tup1	FRE7	-1.89134				Met28	LDB17	-1.70179	Tup1	SNX4	-1.1377
			Tup1	SGA1	-1.90318				Met28	PAU5	-1.70449	Tup1	RRF1	-1.13942
			Tup1	TIR3	-1.93601				Met28	DOT6	-1.70519	Tup1	AAD15	-1.15442
			Tup1	ANB1	-1.97483				Met28	YHR022C	-1.70526	Tup1	GAT1	-1.15592
			Tup1	YBR056W	-2.00805				Met28	SNZ3	-1.72026	Tup1	RTA1	-1.1563
			Tup1	MAL31	-2.02159				Met28	MUD2	-1.73028	Tup1	YLR042C	-1.16968
			Tup1	YJR149W	-2.03639				Met28	PET111	-1.74486	Tup1	GND1	-1.16974
			Tup1	MSH4	-2.04477				Met28	TES1	-1.75066	Tup1	BNA6	-1.17134
			Tup1	IMA2	-2.04734				Met28	CIN5	-1.75315	Tup1	RAV2	-1.17497
			Tup1	ADH5	-2.0608				Met28	SDH5	-1.76639	Tup1	YDR338C	-1.17683
			Tup1	AAC3	-2.07174				Met28	HEM13	-1.77118	Tup1	RAD2	-1.17687
			Tup1	HAC1	-2.12566				Met28	YJR011C	-1.77448	Tup1	GPP2	-1.17694
			Tup1	RTA1	-2.14103				Met28	ENA1	-1.79057	Tup1	IMP2'	-1.18076
			Tup1	DIA1	-2.16505				Met28	GLK1	-1.79678	Tup1	HRD3	-1.18278
			Tup1	THI12	-2.18046				Met28	SCW10	-1.79859	Tup1	MAM33	-1.18791
			Tup1	ECM8	-2.19731				Met28	YLR126C	-1.80191	Tup1	REV7	-1.1915
			Tup1	MDG1	-2.32735				Met28	COX14	-1.80512	Tup1	OCH1	-1.19741
			Tup1	IMA3	-2.36577				Met28	FMC1	-1.80623	Tup1	MUP1	-1.1981
			Tup1	IMA4	-2.36577				Met28	LSM8	-1.81697	Tup1	YIL060W	-1.2049
			Tup1	EMP46	-2.36751				Met28	SLM1	-1.81934	Tup1	PMT1	-1.20565
			Tup1	ENO1	-2.4486				Met28	MED11	-1.82544	Tup1	WSS1	-1.20913
			Tup1	SOR1	-2.58455				Met28	GWT1	-1.84815	Tup1	YER158C	-1.21294
			Tup1	THI4	-2.77277				Met28	DFM1	-1.85046	Tup1	PUT2	-1.21374
			Tup1	CMK2	-2.94594				Met28	PTK2	-1.85284	Tup1	RIE1	-1.2145
			Tup1	KAR2	-3.26599				Met28	ASA1	-1.85379	Tup1	RSB1	-1.2175
			Tup1	DOG1	-3.42831				Met28	MRP2	-1.85452	Tup1	PET494	-1.21903
			Tup1	TDH1	-4.49929				Met28	GPD1	-1.85745	Tup1	MSN1	-1.22317
									Met28	PBP2	-1.86094	Tup1	SHY1	-1.22502
									Met28	YKL091C	-1.86177	Tup1	GPC1	-1.22753
									Met28	BLI1	-1.86907	Tup1	QCR10	-1.22959
									Met28	RRI2	-1.8815	Tup1	CSC1	-1.22968
									Met28	KTR1	-1.88421	Tup1	KIN1	-1.23274
									Met28	STP4	-1.88638	Tup1	PHM6	-1.23434
									Met28	GPG1	-1.89027	Tup1	YNL208W	-1.23796
									Met28	MNN4	-1.90377	Tup1	RFS1	-1.23961
									Met28	EST3	-1.9091	Tup1	YOR111W	-1.24415
									Met28	SIA1	-1.91077	Tup1	CDC37	-1.24632
									Met28	PNC1	-1.91105	Tup1	ARG3	-1.25156
									Met28	NTH2	-1.91551	Tup1	AHP1	-1.26117
									Met28	SUB1	-1.91744	Tup1	NCE103	-1.26544
									Met28	THI21	-1.92525	Tup1	YSC83	-1.27128
									Met28	LCL2	-1.92684	Tup1	APD1	-1.27355
									Met28	YMR315W	-1.92791	Tup1	YJR149W	-1.28052
									Met28	YLR177W	-1.93644	Tup1	YIL108W	-1.29422
									Met28	AIM24	-1.95132	Tup1	FMP40	-1.30761
									Met28	ECM3	-1.95947	Tup1	MIC19	-1.30829
									Met28	YPS1	-1.96645	Tup1	GDE1	-1.3151
									Met28	GAD1	-1.97187	Tup1	SSA4	-1.31579
									Met28	AGX1	-1.9731	Tup1	ADH5	-1.32499
									Met28	MET14	-1.97535	Tup1	AIM11	-1.33962
									Met28	KNH1	-1.97775	Tup1	IDP2	-1.34109
									Met28	LIH1	-1.98509	Tup1	SIR1	-1.34901
									Met28	KTR2	-1.99999	Tup1	ERP2	-1.34901
									Met28	PHR1	-2.00024	Tup1	SEC62	-1.36242
									Met28	MIT1	-2.00245	Tup1	NUS1	-1.36461
									Met28	NDT80	-2.0042	Tup1	MXR1	-1.37085
									Met28	GSY2	-2.00457	Tup1	ECI1	-1.37377
									Met28	SPI1	-2.00913	Tup1	VID30	-1.37766
									Met28	SOR1	-2.01216	Tup1	SWA2	-1.38326
									Met28	SRL2	-2.01635	Tup1	MUD2	-1.39391
									Met28	DDR48	-2.02763	Tup1	USA1	-1.39439
									Met28	YNL134C	-2.02865	Tup1	DUR3	-1.39963
									Met28	PDC6	-2.03047	Tup1	STB3	-1.41572
									Met28	FPR2	-2.03066	Tup1	CBP6	-1.41704
									Met28	TEC1	-2.03683	Tup1	MRPL50	-1.42273
									Met28	MET17	-2.04737	Tup1	UGP1	-1.42378
									Met28	PAL2	-2.06012	Tup1	INP1	-1.42548
									Met28	CWP2	-2.06106	Tup1	URA8	-1.43228
									Met28	YMR187C	-2.07716	Tup1	PET100	-1.43659
									Met28	HLR1	-2.07719	Tup1	TPK1	-1.43854
									Met28	YPL247C	-2.07865	Tup1	YDR034C-D	-1.44376
									Met28	GDB1	-2.08377	Tup1	REC107	-1.45436
									Met28	PBI2	-2.08463	Tup1	ERJ5	-1.46199
									Met28	YDL206W	-2.08854	Tup1	MET14	-1.46482
									Met28	ENA5	-2.08977	Tup1	MHP1	-1.47228
									Met28	FUS1	-2.09249	Tup1	VID24	-1.47568
									Met28	GCY1	-2.102	Tup1	YIL089W	-1.48932
									Met28	YJR096W	-2.11382	Tup1	YET3	-1.50226
									Met28	HAC1	-2.11513	Tup1	MDM38	-1.50267
									Met28	ECM27	-2.12169	Tup1	CSR2	-1.50283
									Met28	TPO4	-2.12413	Tup1	GLN3	-1.50659
									Met28	PDR15	-2.12534	Tup1	BMH1	-1.51022
									Met28	ATP15	-2.13396	Tup1	NEM1	-1.51532
									Met28	YJL213W	-2.15371	Tup1	PST2	-1.5189
									Met28	BDF2	-2.15412	Tup1	YOR072W	-1.52662
									Met28	SGE1	-2.1605	Tup1	PMI40	-1.52913
									Met28	MCR1	-2.17199	Tup1	OYE2	-1.53434
									Met28	SWA2	-2.1752	Tup1	NIT1	-1.54379
									Met28	VTH2	-2.17993	Tup1	YOR192C-B	-1.54502
									Met28	SPG1	-2.18776	Tup1	YMR196W	-1.55613
									Met28	COQ6	-2.19116	Tup1	MRH1	-1.57864
									Met28	BNA5	-2.21611	Tup1	YJR011C	-1.57956
									Met28	GLC3	-2.21626	Tup1	COQ1	-1.58802
									Met28	MRX9	-2.21889	Tup1	MMF1	-1.6047
									Met28	YER158C	-2.22501	Tup1	YKL071W	-1.60646
									Met28	SED1	-2.22602	Tup1	MCP1	-1.61677
									Met28	IKS1	-2.25722	Tup1	YPS1	-1.61699
									Met28	SPS19	-2.25855	Tup1	IMA5	-1.61851
									Met28	YNL234W	-2.26005	Tup1	SPG5	-1.6353
									Met28	ICS2	-2.26123	Tup1	QDR1	-1.63825
									Met28	ORM2	-2.27371	Tup1	YSA1	-1.63993
									Met28	ROF1	-2.27525	Tup1	CLB1	-1.64625
									Met28	ATP7	-2.27563	Tup1	SDH8	-1.6467
									Met28	MED4	-2.28287	Tup1	SUB1	-1.6478
									Met28	NNR1	-2.29189	Tup1	HEM13	-1.65161
									Met28	SRY1	-2.29778	Tup1	MRX10	-1.65686
									Met28	PHM8	-2.30277	Tup1	HXT7	-1.66385
									Met28	ERJ5	-2.31245	Tup1	COQ11	-1.66685
									Met28	TFS1	-2.31614	Tup1	RNR3	-1.72434
									Met28	LHS1	-2.31955	Tup1	VID28	-1.72791
									Met28	YFL002W-A	-2.34135	Tup1	VTC3	-1.73157
									Met28	YGR161W-B	-2.34135	Tup1	ARA1	-1.73237
									Met28	AMS1	-2.34513	Tup1	PFK26	-1.74073
									Met28	POT1	-2.35343	Tup1	CIT3	-1.74688
									Met28	AUS1	-2.35355	Tup1	ATG8	-1.75203
									Met28	YEL073C	-2.35627	Tup1	CMK1	-1.75861
									Met28	ARI1	-2.36443	Tup1	XPT1	-1.76146
									Met28	YMR090W	-2.40618	Tup1	HTD2	-1.76638
									Met28	DFR1	-2.41944	Tup1	ODC1	-1.77012
									Met28	TPS2	-2.42579	Tup1	PEP4	-1.7722
									Met28	TPS1	-2.46451	Tup1	YLR410W-A	-1.7785
									Met28	FMP46	-2.46683	Tup1	IRC4	-1.78042
									Met28	HXT4	-2.47135	Tup1	TAL1	-1.78628
									Met28	UIP4	-2.47316	Tup1	FCY21	-1.79899
									Met28	SPR1	-2.48812	Tup1	HAC1	-1.80073
									Met28	YPS6	-2.53288	Tup1	PTK2	-1.80846
									Met28	YDR034C-D	-2.5376	Tup1	ECM27	-1.81204
									Met28	SUL2	-2.53979	Tup1	YBR056W	-1.83339
									Met28	ENO1	-2.54812	Tup1	YHR180W	-1.84446
									Met28	YDR215C	-2.55418	Tup1	CTF19	-1.85367
									Met28	GPM2	-2.58126	Tup1	DAK2	-1.85408
									Met28	ECM4	-2.66979	Tup1	PRB1	-1.86073
									Met28	THI20	-2.66983	Tup1	DAN4	-1.8611
									Met28	HXT7	-2.67755	Tup1	PDC6	-1.86159
									Met28	SPS100	-2.68285	Tup1	GRX8	-1.86286
									Met28	SYM1	-2.69247	Tup1	YDL218W	-1.86487
									Met28	HBT1	-2.69495	Tup1	YAK1	-1.87302
									Met28	FMP10	-2.69776	Tup1	YMR254C	-1.88058
									Met28	SPS4	-2.71124	Tup1	YBR285W	-1.88728
									Met28	PRY1	-2.71598	Tup1	RSF1	-1.90656
									Met28	MGA1	-2.72892	Tup1	YER152C	-1.91964
									Met28	ALD4	-2.72948	Tup1	MRX3	-1.9219
									Met28	HXT6	-2.73435	Tup1	NRG2	-1.92624
									Met28	OM45	-2.74472	Tup1	YIP3	-1.92774
									Met28	COS9	-2.7486	Tup1	ARG4	-1.94088
									Met28	GSY1	-2.76911	Tup1	PET122	-1.96827
									Met28	HEM15	-2.80319	Tup1	NDI1	-1.97746
									Met28	MPD1	-2.82907	Tup1	LSP1	-1.97885
									Met28	HXT5	-2.84378	Tup1	SDH4	-2.01751
									Met28	DOG2	-2.85473	Tup1	ROQ1	-2.02396
									Met28	YDR210W-B	-2.85484	Tup1	KNH1	-2.04349
									Met28	ADD37	-2.85573	Tup1	ATG29	-2.04582
									Met28	SCS3	-2.85779	Tup1	RNY1	-2.04971
									Met28	URH1	-2.93335	Tup1	ALD4	-2.0509
									Met28	PDC5	-2.94655	Tup1	ICT1	-2.05137
									Met28	IMA5	-2.94996	Tup1	YNL115C	-2.07849
									Met28	YCL020W	-2.95226	Tup1	PRX1	-2.10065
									Met28	GPH1	-2.97685	Tup1	DDR48	-2.1154
									Met28	MSP1	-2.98281	Tup1	THI21	-2.1223
									Met28	ERO1	-2.99499	Tup1	SIP4	-2.13693
									Met28	PNS1	-3.028	Tup1	HSP31	-2.15838
									Met28	BAR1	-3.08495	Tup1	PMT3	-2.16641
									Met28	MSN4	-3.09095	Tup1	NCA3	-2.17229
									Met28	EEB1	-3.09122	Tup1	BDF2	-2.20325
									Met28	MET3	-3.13253	Tup1	SSE2	-2.24432
									Met28	YHR033W	-3.13408	Tup1	ACB1	-2.25618
									Met28	YDR541C	-3.14533	Tup1	PCL7	-2.2613
									Met28	HYM1	-3.19061	Tup1	LHS1	-2.27536
									Met28	EMP46	-3.19397	Tup1	ATG42	-2.29722
									Met28	PGM2	-3.20098	Tup1	RRI2	-2.2985
									Met28	PIR3	-3.2109	Tup1	YCL020W	-2.328
									Met28	IMA3	-3.24953	Tup1	YDR018C	-2.33627
									Met28	IMA4	-3.24953	Tup1	FUN19	-2.38261
									Met28	TSL1	-3.25526	Tup1	BAG7	-2.38972
									Met28	ENA2	-3.26231	Tup1	YPS6	-2.42181
									Met28	CYB2	-3.30021	Tup1	DIT2	-2.44008
									Met28	GPX1	-3.30722	Tup1	YLR152C	-2.52511
									Met28	HSP31	-3.35387	Tup1	ORM2	-2.52575
									Met28	ADR1	-3.39394	Tup1	OYE3	-2.53178
									Met28	NRG2	-3.41336	Tup1	THI72	-2.53749
									Met28	RCK1	-3.47985	Tup1	NNR2	-2.57305
									Met28	EMI2	-3.48402	Tup1	MSP1	-2.61017
									Met28	GSC2	-3.48463	Tup1	SUL2	-2.63951
									Met28	RTC3	-3.54121	Tup1	ERO1	-2.64938
									Met28	YLR410W-A	-3.55111	Tup1	UGA2	-2.6511
									Met28	YDL114W	-3.55801	Tup1	SPG4	-2.66428
									Met28	FMP33	-3.56288	Tup1	IMA3	-2.6645
									Met28	KAR2	-3.56992	Tup1	IMA4	-2.6645
									Met28	AGA1	-3.57152	Tup1	ICL2	-2.67842
									Met28	MCD4	-3.59604	Tup1	LSC2	-2.70009
									Met28	MSC1	-3.60028	Tup1	OM14	-2.71149
									Met28	DOG1	-3.60279	Tup1	STP4	-2.72079
									Met28	YBR137W	-3.65125	Tup1	SDP1	-2.72637
									Met28	SOL4	-3.71306	Tup1	YGR066C	-2.73055
									Met28	ARR1	-3.74156	Tup1	URH1	-2.73182
									Met28	THI11	-3.74248	Tup1	YMR085W	-2.73318
									Met28	RTN2	-3.80018	Tup1	UBI4	-2.75128
									Met28	THI12	-3.83542	Tup1	ENO1	-2.77155
									Met28	THI5	-3.84188	Tup1	MRX9	-2.81382
									Met28	CTT1	-3.90433	Tup1	RDL1	-2.90496
									Met28	HSP26	-3.9737	Tup1	ATG39	-2.92201
									Met28	HXT9	-3.99979	Tup1	HXT6	-2.92218
									Met28	YDL124W	-4.00716	Tup1	YGL081W	-2.96308
									Met28	PHM7	-4.017	Tup1	MDH2	-2.98257
									Met28	SIL1	-4.0429	Tup1	PMA2	-2.99811
									Met28	PAI3	-4.10219	Tup1	HXT11	-2.99896
									Met28	XBP1	-4.28301	Tup1	MSN4	-3.02979
									Met28	YPL257W	-4.35635	Tup1	THI20	-3.03903
									Met28	TDH1	-4.35818	Tup1	GDB1	-3.05473
									Met28	IRC4	-4.37905	Tup1	RGI1	-3.05951
									Met28	NQM1	-4.43393	Tup1	GPM2	-3.0997
									Met28	HXT11	-4.51798	Tup1	YNL194C	-3.11474
									Met28	GRE1	-4.53336	Tup1	WSC4	-3.11537
									Met28	YET2	-4.70773	Tup1	TDA1	-3.13039
									Met28	PIG2	-4.7345	Tup1	SPI1	-3.14885
									Met28	DCS2	-4.75402	Tup1	RCK1	-3.15716
									Met28	FDC1	-4.76504	Tup1	SPS100	-3.16311
									Met28	ALD3	-5.02661	Tup1	KAR2	-3.18186
									Met28	YOR289W	-5.0831	Tup1	NDE2	-3.22208
									Met28	SEO1	-5.16395	Tup1	GOR1	-3.26224
									Met28	SIP18	-5.26916	Tup1	INH1	-3.40929
									Met28	MST27	-5.38212	Tup1	ECM4	-3.40929
									Met28	YIL086C	-5.60142	Tup1	FMP48	-3.43186
									Met28	FMP16	-5.67135	Tup1	SOR1	-3.43211
									Met28	RPI1	-6.03013	Tup1	YNL195C	-3.4326
									Met28	GND2	-6.20835	Tup1	OM45	-3.49911
									Met28	AFB1	-6.77091	Tup1	GLC3	-3.52655
									Met28	PYK2	-6.77803	Tup1	ICY1	-3.56957
									Met28	YHR180W	-7.97272	Tup1	YRO2	-3.58986
									Met28	YGL204C	-8.21793	Tup1	TMA10	-3.59065
									Met28	HSP12	-9.04697	Tup1	SGA1	-3.70012
									Met28	SIN3	-9.89108	Tup1	SIP18	-3.83347
									Met28	YAR028W	-11.0348	Tup1	PRY1	-3.95968
									Fkh1	BSC1	6.77531	Tup1	USV1	-4.01341
									Fkh1	ECM11	6.62308	Tup1	GSY1	-4.01423
									Fkh1	PRM7	6.09765	Tup1	GLK1	-4.02352
									Fkh1	ZRT1	5.94064	Tup1	UIP4	-4.0687
									Fkh1	ARG1	5.34339	Tup1	SOL4	-4.11239
									Fkh1	SNZ1	5.30763	Tup1	GPX1	-4.15421
									Fkh1	DIP5	5.17281	Tup1	EMI2	-4.15532
									Fkh1	OPT2	5.14696	Tup1	GPH1	-4.16743
									Fkh1	GDH2	5.1077	Tup1	DOG1	-4.17043
									Fkh1	MND1	5.07742	Tup1	SNZ2	-4.25341
									Fkh1	BAT2	4.68646	Tup1	BDH2	-4.27966
									Fkh1	ATG41	4.26413	Tup1	THI4	-4.41447
									Fkh1	ARG3	3.94583	Tup1	URA10	-4.42428
									Fkh1	NRM1	3.7943	Tup1	EMP46	-4.44202
									Fkh1	SIT1	3.78996	Tup1	SNZ3	-4.45344
									Fkh1	LYS20	3.55796	Tup1	YNL134C	-4.58868
									Fkh1	CIT2	3.52683	Tup1	TFS1	-4.68853
									Fkh1	SSU1	3.42562	Tup1	MST27	-4.7456
									Fkh1	ARO10	3.37379	Tup1	YLR149C	-4.85101
									Fkh1	GGC1	3.33044	Tup1	RTC3	-4.96257
									Fkh1	HIS4	3.22209	Tup1	PGM2	-4.96377
									Fkh1	SGO1	3.00234	Tup1	MSC1	-5.07083
									Fkh1	YDR042C	2.99678	Tup1	YMR090W	-5.10127
									Fkh1	DSE2	2.97977	Tup1	DCS2	-5.14544
									Fkh1	TMT1	2.95291	Tup1	YER188W	-5.19343
									Fkh1	SCW11	2.87184	Tup1	ALD3	-5.27128
									Fkh1	LYS1	2.79086	Tup1	PYK2	-5.31611
									Fkh1	ARG5,6	2.77556	Tup1	YHR033W	-5.33111
									Fkh1	ADH5	2.68285	Tup1	PDC5	-5.34159
									Fkh1	FRE1	2.67894	Tup1	TDH1	-5.6238
									Fkh1	SUN4	2.66145	Tup1	YFL019C	-5.80242
									Fkh1	CDC6	2.64165	Tup1	THI12	-6.14403
									Fkh1	RIB5	2.60326	Tup1	XBP1	-6.2289
									Fkh1	BUD3	2.593	Tup1	THI11	-6.51419
									Fkh1	PLB2	2.59038	Tup1	GND2	-6.66247
									Fkh1	DLD3	2.55343	Tup1	MF(ALPHA)1	-7.1343
									Fkh1	ZTA1	2.53462	Tup1	YIL102C	-7.5214
									Fkh1	FKH2	2.51793	Tup1	HSP12	-8.03477
									Fkh1	RAD51	2.51377	Tup1	YDR098C-A	-9.18127
									Fkh1	ARG4	2.45844	Tup1	YAR028W	-10.9951
									Fkh1	VAC17	2.41838	Tod6	SUT1	2.64674
									Fkh1	PHO5	2.37198	Tod6	GPX2	2.57137
									Fkh1	MET28	2.29533	Tod6	BTN2	2.38173
									Fkh1	ARG7	2.28007	Tod6	NDE1	2.21355
									Fkh1	RPS14A	2.27124	Tod6	AQR1	1.63785
									Fkh1	PCL5	2.25408	Tod6	FDO1	1.35461
									Fkh1	FKH1	2.226	Tod6	RHO3	1.33343
									Fkh1	MCH4	2.22206	Tod6	CDC21	1.32923
									Fkh1	YGL117W	2.18578	Tod6	VHR2	1.29516
									Fkh1	RPL9A	2.16506	Tod6	NET1	1.16474
									Fkh1	RFU1	2.14565	Tod6	RRP12	1.13165
									Fkh1	SAM4	2.14093	Tod6	YGR035C	1.10114
									Fkh1	IDP1	2.14029	Tod6	GCV2	1.07846
									Fkh1	GAS3	2.13146	Tod6	GCV1	1.03327
									Fkh1	SDT1	2.12919	Tod6	RHO2	1.02158
									Fkh1	EGT2	2.12398	Tod6	MID2	1.00222
									Fkh1	RKI1	2.11556	Tod6	DMA2	-1.03756
									Fkh1	YML131W	2.08908	Tod6	TPO2	-1.07825
									Fkh1	HIS5	2.06004	Tod6	PYC1	-1.14893
									Fkh1	LEU2	2.04424	Tod6	MLS1	-1.43759
									Fkh1	FUR1	2.02049	Tod6	CIP1	-1.44166
									Fkh1	ADE12	2.01186	Tod6	YOX1	-1.45101
									Fkh1	ERG6	2.01052	Tod6	ERJ5	-1.46199
									Fkh1	RPL30	2.00928	Tod6	CLB1	-1.64625
									Fkh1	MYO1	2.00911	Tod6	ECM3	-1.70661
									Fkh1	SPC97	2.00669	Tod6	ARG4	-1.94088
									Fkh1	YNL058C	1.99932	Tod6	ICT1	-2.05137
									Fkh1	AIM44	1.99767	Tod6	EHT1	-2.11199
									Fkh1	RPS28B	1.93632	Tod6	STP4	-2.72079
									Fkh1	PHO11	1.90507	Tod6	YRO2	-3.58986
									Fkh1	STR3	1.86973	Tod6	TDH1	-5.6238
									Fkh1	BMT6	1.85699	Ifh1	OPT2	2.28963
									Fkh1	DSE1	1.85522	Ifh1	RPS14A	2.15525
									Fkh1	RPL12A	1.84302	Ifh1	RPL18B	2.14521
									Fkh1	ELO2	1.83563	Ifh1	RPL43B	2.09866
									Fkh1	RPS17B	1.83104	Ifh1	YML131W	2.06673
									Fkh1	BUD4	1.82637	Ifh1	UTP22	2.00558
									Fkh1	ALK2	1.80791	Ifh1	RPL9A	1.97168
									Fkh1	RTC2	1.7778	Ifh1	FAL1	1.88334
									Fkh1	YGK1	1.7664	Ifh1	RPL30	1.86311
									Fkh1	YJL118W	1.75992	Ifh1	RPL12A	1.80274
									Fkh1	ATO3	1.75475	Ifh1	RPS9A	1.72792
									Fkh1	QDR2	1.74823	Ifh1	HIS6	1.68212
									Fkh1	RPS9B	1.7311	Ifh1	RPS12	1.67166
									Fkh1	SNU13	1.72381	Ifh1	DRS1	1.66486
									Fkh1	HIS1	1.72153	Ifh1	RPS21A	1.63153
									Fkh1	RPS13	1.7093	Ifh1	RPL7A	1.62705
									Fkh1	YBL028C	1.70862	Ifh1	RPL37A	1.59534
									Fkh1	RPS21B	1.70555	Ifh1	RPL7B	1.59447
									Fkh1	RPS18A	1.70371	Ifh1	RPL14A	1.58939
									Fkh1	PYC1	1.69336	Ifh1	RPL28	1.58334
									Fkh1	CLB4	1.68171	Ifh1	RPS18A	1.57671
									Fkh1	AAH1	1.68132	Ifh1	RPS20	1.57291
									Fkh1	RPS22A	1.6718	Ifh1	RPS15	1.55282
									Fkh1	AIM20	1.66874	Ifh1	RPP0	1.53596
									Fkh1	RPL14A	1.66834	Ifh1	RPL5	1.52503
									Fkh1	RPS20	1.66549	Ifh1	RPL27A	1.52109
									Fkh1	FAA3	1.65744	Ifh1	RPS22A	1.51538
									Fkh1	FLO11	1.64951	Ifh1	HO	1.49949
									Fkh1	RPS12	1.6466	Ifh1	RPL2B	1.49341
									Fkh1	FPR4	1.63587	Ifh1	RPL34A	1.48987
									Fkh1	GLN1	1.63289	Ifh1	ASC1	1.48842
									Fkh1	SLK19	1.62543	Ifh1	RPL20A	1.4865
									Fkh1	RPL1A	1.60893	Ifh1	RPL6A	1.47714
									Fkh1	RPL28	1.60161	Ifh1	RPS17A	1.47204
									Fkh1	ALK1	1.59826	Ifh1	RPS13	1.47156
									Fkh1	RPS25B	1.59335	Ifh1	IFH1	1.464
									Fkh1	RPS15	1.58819	Ifh1	RPS21B	1.45066
									Fkh1	CSM1	1.58719	Ifh1	RPL24A	1.44973
									Fkh1	RPL37A	1.5863	Ifh1	RPS19B	1.44083
									Fkh1	RPL15A	1.57921	Ifh1	RPL23A	1.4383
									Fkh1	RPL38	1.57723	Ifh1	RPL38	1.43426
									Fkh1	RPS31	1.57444	Ifh1	RPS9B	1.42084
									Fkh1	RPL5	1.57111	Ifh1	ASH1	1.41822
									Fkh1	ISU1	1.5679	Ifh1	RPL4A	1.41607
									Fkh1	RPA43	1.56771	Ifh1	RPS0A	1.40606
									Fkh1	SPL2	1.56371	Ifh1	RPP2B	1.40539
									Fkh1	UTP6	1.5538	Ifh1	RPS25B	1.40246
									Fkh1	RPL7A	1.54859	Ifh1	RPS16A	1.40227
									Fkh1	NIP7	1.54807	Ifh1	RPL14B	1.39708
									Fkh1	RPL27A	1.52029	Ifh1	RPL22A	1.39446
									Fkh1	RPS19A	1.51755	Ifh1	RPS4A	1.38518
									Fkh1	BRX1	1.51697	Ifh1	RPL43A	1.37889
									Fkh1	RPL4A	1.50877	Ifh1	RPL8B	1.375
									Fkh1	RPL7B	1.50836	Ifh1	RPL31A	1.37124
									Fkh1	RPS16A	1.50495	Ifh1	RPL10	1.36941
									Fkh1	RPL34B	1.50318	Ifh1	RPS8A	1.36792
									Fkh1	RPL40B	1.4946	Ifh1	YHR020W	1.35706
									Fkh1	RPS3	1.49438	Ifh1	RPL3	1.35632
									Fkh1	YLR326W	1.49251	Ifh1	RPL6B	1.35515
									Fkh1	UTP4	1.48685	Ifh1	RPS0B	1.35505
									Fkh1	RPL8B	1.48079	Ifh1	RPS5	1.35123
									Fkh1	RPS19B	1.47918	Ifh1	RPS1B	1.34227
									Fkh1	RPL23A	1.47016	Ifh1	RPS7A	1.33941
									Fkh1	STM1	1.46994	Ifh1	RPL15A	1.33522
									Fkh1	RPL2B	1.46739	Ifh1	PLB2	1.32939
									Fkh1	RPP1B	1.46712	Ifh1	RPS24A	1.31777
									Fkh1	CLB2	1.46544	Ifh1	RPS18B	1.3177
									Fkh1	RPL10	1.46193	Ifh1	RPL34B	1.31648
									Fkh1	GUA1	1.4617	Ifh1	RPL11A	1.30382
									Fkh1	RPS21A	1.45021	Ifh1	RPL13B	1.30196
									Fkh1	CHS2	1.44875	Ifh1	RPL12B	1.29952
									Fkh1	RPL14B	1.44649	Ifh1	RPS10A	1.28682
									Fkh1	BRN1	1.43635	Ifh1	RPS6A	1.27669
									Fkh1	RPS18B	1.4351	Ifh1	RPS3	1.27643
									Fkh1	RPS7A	1.42543	Ifh1	RPP2A	1.27178
									Fkh1	RPL1B	1.41558	Ifh1	RPL17A	1.26556
									Fkh1	RLP24	1.41438	Ifh1	RPP1B	1.26392
									Fkh1	RPP2B	1.39626	Ifh1	RPS31	1.26237
									Fkh1	RPS17A	1.39408	Ifh1	RPL1A	1.26163
									Fkh1	IQG1	1.38679	Ifh1	RPS23B	1.25805
									Fkh1	RPP2A	1.38581	Ifh1	RPL19B	1.24632
									Fkh1	RPL11A	1.38387	Ifh1	RPL16B	1.24533
									Fkh1	RPL31A	1.37437	Ifh1	RPS25A	1.24202
									Fkh1	RPS6A	1.37396	Ifh1	RPL31B	1.23999
									Fkh1	RPS9A	1.37033	Ifh1	RPL18A	1.23548
									Fkh1	RPS8B	1.35974	Ifh1	CHA1	1.22999
									Fkh1	RPS24B	1.35974	Ifh1	RPL35A	1.22817
									Fkh1	FTR1	1.35939	Ifh1	RPL4B	1.22639
									Fkh1	RPL16B	1.35234	Ifh1	RPL25	1.21082
									Fkh1	RPS5	1.3503	Ifh1	RPS16B	1.20695
									Fkh1	RPL12B	1.3489	Ifh1	RPL32	1.20586
									Fkh1	RPL24A	1.34869	Ifh1	RPL2A	1.19598
									Fkh1	RPA34	1.34648	Ifh1	RPL21B	1.18768
									Fkh1	MET6	1.33842	Ifh1	RPL16A	1.17493
									Fkh1	RPS6B	1.33467	Ifh1	RPS1A	1.16734
									Fkh1	RPS23B	1.32774	Ifh1	RPL40A	1.15155
									Fkh1	RPL25	1.32187	Ifh1	RPS27B	1.14229
									Fkh1	HOS3	1.31649	Ifh1	HYP2	1.13713
									Fkh1	RPP0	1.31354	Ifh1	RPS11B	1.1271
									Fkh1	RPL43A	1.31185	Ifh1	RPS2	1.12404
									Fkh1	RPL17B	1.30686	Ifh1	RPS26A	1.12311
									Fkh1	RPL18A	1.3065	Ifh1	RPP1A	1.11391
									Fkh1	RPL22A	1.30516	Ifh1	RPL17B	1.10815
									Fkh1	ATR1	1.30488	Ifh1	RPL24B	1.09972
									Fkh1	DBP3	1.30264	Ifh1	RPS7B	1.09121
									Fkh1	HAS1	1.30082	Ifh1	AIM44	1.08127
									Fkh1	RPL20A	1.29819	Ifh1	RPL13A	1.08054
									Fkh1	ATF1	1.29693	Ifh1	RPS28B	1.06439
									Fkh1	RPL35A	1.28468	Ifh1	LYS20	1.02891
									Fkh1	RPL4B	1.28426	Ifh1	RPS14B	1.02728
									Fkh1	RPS8A	1.27711	Ifh1	RPS23A	1.0202
									Fkh1	RPS16B	1.27595	Ifh1	RPL37B	1.00391
									Fkh1	RPL31B	1.2719	Ifh1	MET5	-1.00149
									Fkh1	KIP2	1.27077	Ifh1	IBA57	-1.06268
									Fkh1	RPL32	1.27074	Ifh1	TPO2	-1.07825
									Fkh1	CPS1	1.26208	Ifh1	HOT13	-1.07828
									Fkh1	RPS27B	1.25335	Ifh1	MET6	-1.10242
									Fkh1	RPS2	1.24815	Ifh1	FCY22	-1.144
									Fkh1	RPS25A	1.24459	Ifh1	PPN2	-1.16715
									Fkh1	FRK1	1.24417	Ifh1	MAM33	-1.18791
									Fkh1	RPS24A	1.23996	Ifh1	PMT1	-1.20565
									Fkh1	RPS1B	1.2384	Ifh1	RSB1	-1.2175
									Fkh1	RPS0A	1.22314	Ifh1	PHM6	-1.23434
									Fkh1	RPL19B	1.22071	Ifh1	ARG3	-1.25156
									Fkh1	STU2	1.21927	Ifh1	YKR011C	-1.26662
									Fkh1	RPL26B	1.21886	Ifh1	SPS4	-1.28723
									Fkh1	RRB1	1.21278	Ifh1	SSA4	-1.31579
									Fkh1	UGA1	1.21183	Ifh1	DPC29	-1.3163
									Fkh1	RPL23B	1.20655	Ifh1	ADH5	-1.32499
									Fkh1	NOG2	1.20287	Ifh1	COA4	-1.47709
									Fkh1	CTS1	1.20027	Ifh1	YBR085C-A	-1.60754
									Fkh1	RPL21B	1.19323	Ifh1	VTC3	-1.73157
									Fkh1	RPL6A	1.19246	Ifh1	FCY21	-1.79899
									Fkh1	RPL20B	1.19005	Ifh1	CTF19	-1.85367
									Fkh1	RPL40A	1.18942	Ifh1	PET122	-1.96827
									Fkh1	RPS14B	1.18698	Ifh1	NCA3	-2.17229
									Fkh1	RPL17A	1.18527	Ifh1	OYE3	-2.53178
									Fkh1	NSR1	1.18245	Ifh1	YGL117W	-2.61036
									Fkh1	RPS4B	1.18242	Ifh1	SPG4	-2.66428
									Fkh1	RPS4A	1.17197	Ifh1	APE1	-3.04954
									Fkh1	RPL13B	1.17014	Ifh1	MET3	-3.36255
									Fkh1	RPS10A	1.16403	Ifh1	BNA2	-3.44776
									Fkh1	RPS1A	1.15413	Ifh1	ICS2	-3.63783
									Fkh1	NIS1	1.14497	Ifh1	BNA1	-3.93001
									Fkh1	MUP3	1.14195	Ifh1	PIR3	-4.12778
									Fkh1	MET1	1.12509	Ifh1	EMI2	-4.15532
									Fkh1	RPL16A	1.11267	Ifh1	MET17	-4.25808
									Fkh1	FET3	1.09643	Ifh1	RPI1	-5.80455
									Fkh1	CYK3	1.09479	Ifh1	XBP1	-6.2289
									Fkh1	SER3	1.08723	Ifh1	MF(ALPHA)1	-7.1343
									Fkh1	CGR1	1.08661	Ifh1	GIT1	-7.43554
									Fkh1	RPL6B	1.084	Ifh1	HSP12	-8.03477
									Fkh1	URA3	1.07923	Ash1	CUP1-1	8.05604
									Fkh1	TEF2	1.07335	Ash1	CUP1-2	8.05604
									Fkh1	MRT4	1.06165	Ash1	FLO11	5.67732
									Fkh1	RPS11B	1.05417	Ash1	PHO89	3.20418
									Fkh1	MRS6	1.05039	Ash1	PRM5	2.65121
									Fkh1	MCH5	1.04836	Ash1	GPX2	2.57137
									Fkh1	RPS11A	1.04175	Ash1	YML131W	2.06673
									Fkh1	LHP1	1.03331	Ash1	DBP7	2.05365
									Fkh1	SWI5	1.01955	Ash1	PAU12	1.86479
									Fkh1	GAT1	1.00283	Ash1	ENP2	1.85172
[truncated: 11,943 more rows]

## Sheet: DownstreamGO biological process
Culture temperature	Transcrition factor deletion	SDETFs	Gene expression changes of SDETFs	Regulation: core TF vs. downstream TF	Gene expression changes of target genes	Regulation: downstream TF vs. Shared GO Processes Among Targets
							Shared GO Processes Among Targets (Bonferroni correction P-value < 0.05 (http://funspec.med.utoronto.ca/))	p-value	k	f	Targeted SDEGs
40°C	sin3∆	Hac1	Decreased	Activator	Increased	Inhibitor	synaptonemal complex assembly [GO:0007130]	2.228e-05	3	8	SPO16 HOP1 REC8
40°C	sin3∆	Hac1	Decreased	Activator	Decreased	Activator	posttranslational protein targeting to membrane, translocation [GO:0031204]	8.574e-07	4	9	SBH1 KAR2 LHS1 SEC72
40°C	sin3∆	Hac1	Decreased	Activator	Decreased	Activator	response to unfolded protein [GO:0006986]	2.214e-06	4	11	HAC1 KAR2 LHS1 SCJ1
40°C	sin3∆	Hac1	Decreased	Activator	Decreased	Activator	protein O-linked glycosylation [GO:0006493]	1.179e-05	4	16	PMT2 PMT1 KTR1 DPM1
40°C	sin3∆	Rpi1	Decreased	Activator	Decreased	Activator	No enrichment
40°C	sin3∆	Thi2	Decreased	Activator	Increased	Inhibitor	branched chain family amino acid catabolic process [GO:0009083]	7.724e-06	3	9	PDC6 BAT1 PDC5
40°C	sin3∆	Thi2	Decreased	Activator	Decreased	Activator	translation [GO:0006412]	2.098e-14	19	318	RPL27B RPL22B RPL29 RPL26B RPS27B RPL42B RPL16A RPS27A RPL40B RPS30A RPS25B RPL26A RPS22B RPS17A RPL42A SUI1 RPS19A RPS30B RPS9A
40°C	sin3∆	Thi2	Decreased	Activator	Decreased	Activator	gluconeogenesis [GO:0006094]	8.355e-08	5	18	TDH3 ENO1 ENO2 TDH1 FBA1
40°C	sin3∆	Thi2	Decreased	Activator	Decreased	Activator	glycolysis [GO:0006096]	9.123e-07	5	28	TDH3 ENO1 ENO2 TDH1 FBA1
40°C	sin3∆	Ino4	Decreased	Activator	Increased	Inhibitor	sporulation resulting in formation of a cellular spore [GO:0030435]	1.912e-08	11	103	SPS22 RRT12 EMI2 SPR3 SPO11 SPO13 SGA1 OSW2 FKS3 SPR1 MUM3
40°C	sin3∆	Ino4	Decreased	Activator	Increased	Inhibitor	carbohydrate metabolic process [GO:0005975]	1.065e-05	8	94	EMI2 HXK1 NQM1 GUT1 SGA1 PGM2 SPR1 GPH1
40°C	sin3∆	Ino4	Decreased	Activator	Increased	Inhibitor	ascospore wall assembly [GO:0030476]	1.238e-05	6	46	SPS22 RRT12 SPR3 OSW2 FKS3 MUM3
40°C	sin3∆	Ino4	Decreased	Activator	Decreased	Activator	protein folding [GO:0006457]	8.909e-09	8	96	HSP26 FPR2 SSA2 TSA1 ERO1 SCJ1 MGE1 MPD1
40°C	sin3∆	Ino4	Decreased	Activator	Decreased	Activator	response to unfolded protein [GO:0006986]	1.508e-05	3	11	KAR2 LHS1 SCJ1
40°C	sin3∆	Phd1	Decreased	Activator	Decreased	Activator	No enrichment
40°C	sin3∆	Opi1	Decreased	Activator	Increased	Inhibitor	oxidation-reduction process [GO:0055114]	5.191e-06	11	272	ETR1 TSA2 MET10 MET13 MDH1 FRE2 IDP2 YLR460C NDE1 GOR1 ALD6
40°C	sin3∆	Opi1	Decreased	Activator	Increased	Inhibitor	metabolic process [GO:0008152]	1.355e-05	13	425	ETR1 PGS1 FAA2 AGX1 MET10 HXK1 BIO2 MDH1 CAR2 YLR460C GOR1 SPR1 ALD6
40°C	sin3∆	Rsf2	Increased	Inhibitor	Increased	Activator	reciprocal meiotic recombination [GO:0007131]	1.619e-05	5	47	MSH5 DMC1 MND1 REC114 MEI5
40°C	sin3∆	Adr1	Increased	Inhibitor	Increased	Activator	metabolic process [GO:0008152]	<1e-14	29	425	ACS1 ETR1 TKL2 FAA2 ICL1 GSY1 HXK1 YGL039W POX1 NQM1 GND2 BAT1 IMD2 POT1 FOX2 GPT2 PDC5 CAR2 CYB2 SPO1 SPS19 MDH2 LSC1 DCI1 ALD4 FDH1 PMA2 ALD6 ICL2
40°C	sin3∆	Adr1	Increased	Inhibitor	Increased	Activator	fatty acid metabolic process [GO:0006631]	9.192e-10	8	28	AGP2 FAA2 POX1 POT1 FOX2 CAT2 CRC1 DCI1
40°C	sin3∆	Adr1	Increased	Inhibitor	Increased	Activator	oxidation-reduction process [GO:0055114]	2.052e-08	17	272	ETR1 YGL039W POX1 GND2 IMD2 GUT2 LYS1 SDH1 FOX2 IDP2 CYB2 GCV2 SPS19 MDH2 ALD4 FDH1 ALD6
40°C	sin3∆	Adr1	Increased	Inhibitor	Increased	Activator	fatty acid beta-oxidation [GO:0006635]	5.891e-08	5	10	POX1 POT1 FOX2 DCI1 ANT1
40°C	sin3∆	Adr1	Increased	Inhibitor	Increased	Activator	tricarboxylic acid cycle [GO:0006099]	1.327e-06	6	30	ICL1 SDH1 IDP2 MDH2 LSC1 CIT3
40°C	sin3∆	Adr1	Increased	Inhibitor	Increased	Activator	lipid metabolic process [GO:0006629]	5.843e-06	7	58	ATG15 FAA2 POX1 POT1 FOX2 CAT2 DCI1
40°C	sin3∆	Adr1	Increased	Inhibitor	Increased	Activator	propionate metabolic process [GO:0019541]	1.748e-05	3	5	CIT3 PDH1 ICL2
40°C	sin3∆	Adr1	Increased	Inhibitor	Decreased	Inhibitor	glycolysis [GO:0006096]	1.465e-05	3	28	CDC19 ENO1 ENO2
40°C	sin3∆	Stp2	Increased	Inhibitor	Increased	Activator	amino acid transmembrane transport [GO:0003333]	2.744e-07	6	24	AGP2 AGP1 UGA4 BAP3 MUP1 ALP1
40°C	sin3∆	Stp2	Increased	Inhibitor	Increased	Activator	amino acid transport [GO:0006865]	9.013e-06	6	42	AGP2 AGP1 UGA4 BAP3 MUP1 ALP1
40°C	sin3∆	Stp2	Increased	Inhibitor	Increased	Activator	transmembrane transport [GO:0055085]	1.135e-05	14	303	AGP2 PHO89 AGP1 UGA4 BAP3 YDR387C ZRT1 MUP1 HXT5 DAL4 PXA2 ALP1 HXT14 PXA1
40°C	sin3∆	Msn4	Increased	Inhibitor	Increased	Activator	oxidation-reduction process [GO:0055114]	5.607e-12	38	272	PRX1 LEU2 FRM2 HIS4 MXR2 NDE2 GDH2 PST2 TSA2 MXR1 MET10 YGL039W POX1 GND2 AIM17 IMD2 GUT2 LYS1 YJL045W YJR149W MDH1 FOX2 XYL2 PUT1 IDP2 HMX1 FRE1 YLR460C CYB2 FET3 GCV2 SPS19 GOR1 MDH2 GCY1 ALD4 ALD6 YPR127W
40°C	sin3∆	Msn4	Increased	Inhibitor	Increased	Activator	metabolic process [GO:0008152]	2.339e-10	46	425	ACS1 TKL2 MAL32 NFS1 HIS4 GDH2 GAL3 YDR018C CCC2 FAA2 ICL1 AGX1 GSY1 MET10 HXK1 YGL039W POX1 NQM1 GND2 MAL12 IMD2 SGA1 POT1 YJR149W MDH1 FOX2 GPT2 XYL2 PDC5 CTS1 MET17 CAR2 YLR460C CYB2 SNZ1 SPS19 GOR1 MDH2 DCI1 SPR1 MUM3 ALD4 PMA2 ALD6 GDB1 HPA2
40°C	sin3∆	Msn4	Increased	Inhibitor	Increased	Activator	carbohydrate metabolic process [GO:0005975]	2.11e-08	18	94	MAL32 GAL3 EMI2 HXK1 NQM1 XKS1 MAL12 SGA1 MDH1 XYL2 CTS1 YMR085W PGM2 CAT8 MDH2 SPR1 GPH1 GDB1
40°C	sin3∆	Msn4	Increased	Inhibitor	Increased	Activator	fatty acid metabolic process [GO:0006631]	7.816e-07	9	28	AGP2 FRM2 FAA2 POX1 POT1 FOX2 CAT2 CRC1 DCI1
40°C	sin3∆	Msn4	Increased	Inhibitor	Increased	Activator	sporulation resulting in formation of a cellular spore [GO:0030435]	2.529e-06	16	103	SPS22 RRT12 FMP45 ADY3 DON1 EMI2 SHC1 SPO11 RIM4 SPO13 SGA1 IME2 SPS19 SPR1 MUM3 MEI5
40°C	sin3∆	Msn4	Increased	Inhibitor	Decreased	Inhibitor	glycolysis [GO:0006096]	1.011e-05	5	28	CDC19 ENO1 ENO2 TDH1 GPM1
40°C	sin3∆	Mss11	Increased	Inhibitor	Increased	Activator	amino acid transmembrane transport [GO:0003333]	4.024e-07	5	24	UGA4 MUP1 MUP3 MMP1 SAM3
40°C	sin3∆	Mss11	Increased	Inhibitor	Increased	Activator	amino acid transport [GO:0006865]	7.369e-06	5	42	UGA4 MUP1 MUP3 MMP1 SAM3
40°C	sin3∆	Mss11	Increased	Inhibitor	Increased	Activator	transmembrane transport [GO:0055085]	2.203e-05	10	303	PHO89 UGA4 ZRT1 MUP1 MUP3 HXT4 MMP1 GAL2 HXT2 SAM3
40°C	sin3∆	Mss11	Increased	Inhibitor	Decreased	Inhibitor	translation [GO:0006412]	1.558e-12	14	318	EFB1 RPL22B RPL29 RPS20 RPS27A RPS30A RPS25B RPS17A RPL9B RPL42A SUI1 RPS19A RPL21B RPS9A
40°C	sin3∆	Gal3	Increased	Inhibitor	Decreased	Inhibitor	No enrichment
40°C	sin3∆	Mal33	Increased	Inhibitor	Decreased	Inhibitor	purine nucleotide biosynthetic process [GO:0006164]	9.002e-08	4	18	ADE1 MTD1 ADE13 ADE17
40°C	sin3∆	Mal33	Increased	Inhibitor	Decreased	Inhibitor	'de novo' IMP biosynthetic process [GO:0006189]	1.18e-06	3	9	ADE1 ADE13 ADE17
40°C	sin3∆	Xbp1	Increased	Inhibitor	Increased	Activator	tricarboxylic acid cycle [GO:0006099]	1.395e-07	8	30	ICL1 LSC2 MDH1 SDH1 IDP2 CIT1 LSC1 CIT3
40°C	sin3∆	Xbp1	Increased	Inhibitor	Increased	Activator	metabolic process [GO:0008152]	2.188e-07	27	425	MAL32 PGS1 ICL1 AGX1 MET10 YGL039W POX1 LSC2 BIO2 IMA1 MAL12 IMD2 SGA1 POT1 MDH1 FOX2 PDC5 CTS1 CAR2 CYB2 ARG7 SNZ1 GOR1 LSC1 ALD4 PMA2 GDB1
40°C	sin3∆	Xbp1	Increased	Inhibitor	Increased	Activator	carbohydrate metabolic process [GO:0005975]	6e-07	12	94	MAL32 EMI2 XKS1 IMA1 MAL12 SGA1 MDH1 CTS1 YMR085W PGM2 GPH1 GDB1
40°C	sin3∆	Xbp1	Increased	Inhibitor	Increased	Activator	oxidation-reduction process [GO:0055114]	1.06e-06	20	272	HBN1 TSA2 MET10 YGL039W POX1 AIM17 IMD2 LYS1 MDH1 SRX1 SDH1 FOX2 IDP2 FRE1 CYB2 FET3 NDE1 GOR1 GCY1 ALD4
40°C	sin3∆	Xbp1	Increased	Inhibitor	Increased	Activator	glycogen catabolic process [GO:0005980]	9.535e-06	3	3	SGA1 GPH1 GDB1
40°C	sin3∆	Xbp1	Increased	Inhibitor	Increased	Activator	fatty acid metabolic process [GO:0006631]	2.18e-05	6	28	AGP2 POX1 POT1 FOX2 CAT2 CRC1
40°C	sin3∆	Xbp1	Increased	Inhibitor	Decreased	Inhibitor	gluconeogenesis [GO:0006094]	1.455e-07	5	18	ENO1 ENO2 TDH1 FBA1 GPM1
40°C	sin3∆	Xbp1	Increased	Inhibitor	Decreased	Inhibitor	response to unfolded protein [GO:0006986]	8.504e-07	4	11	HAC1 KAR2 LHS1 SCJ1
40°C	sin3∆	Xbp1	Increased	Inhibitor	Decreased	Inhibitor	glycolysis [GO:0006096]	1.579e-06	5	28	ENO1 ENO2 TDH1 FBA1 GPM1
40°C	sin3∆	Xbp1	Increased	Inhibitor	Decreased	Inhibitor	metabolic process [GO:0008152]	8.409e-06	13	425	ERG26 PMA1 SCW4 DOG1 OYE2 TDH1 FBA1 GPM1 MCD4 PDC1 ADE17 GRE2 LIP5
40°C	sin3∆	Usv1	Increased	Inhibitor	Decreased	Inhibitor	No enrichment
40°C	sin3∆	Cat8	Increased	Inhibitor	Increased	Activator	oxidation-reduction process [GO:0055114]	1.647e-08	14	272	LEU2 GDH2 POX1 AIM17 YJL045W SDH1 FRE2 FOX2 IDP2 CYB2 MDH2 ALD4 FDH1 ALD6
40°C	sin3∆	Cat8	Increased	Inhibitor	Increased	Activator	fatty acid metabolic process [GO:0006631]	2.348e-06	5	28	POX1 POT1 FOX2 CAT2 CRC1
40°C	sin3∆	Cat8	Increased	Inhibitor	Increased	Activator	tricarboxylic acid cycle [GO:0006099]	3.364e-06	5	30	ICL1 YJL045W SDH1 IDP2 MDH2
40°C	sin3∆	Cat8	Increased	Inhibitor	Increased	Activator	metabolic process [GO:0008152]	3.993e-06	14	425	ACS1 GDH2 ICL1 POX1 BAT1 POT1 FOX2 MET17 CYB2 MDH2 ALD4 FDH1 ALD6 ICL2
40°C	sin3∆	Mth1	Increased	Inhibitor	Increased	Activator	No enrichment
40°C	sin3∆	Met28	Increased	Inhibitor	Increased	Activator	methionine biosynthetic process [GO:0009086]	1.067e-09	6	31	MET6 MET10 STR3 MET28 MET17 MET2
40°C	sin3∆	Met28	Increased	Inhibitor	Increased	Activator	cellular amino acid biosynthetic process [GO:0008652]	1.292e-06	6	98	MET6 MET10 STR3 MET28 MET17 MET2
40°C	sin3∆	Met28	Increased	Inhibitor	Increased	Activator	amino acid transmembrane transport [GO:0003333]	1.614e-06	4	24	MUP1 MUP3 MMP1 SAM3
40°C	sin3∆	Met28	Increased	Inhibitor	Increased	Activator	cysteine biosynthetic process [GO:0019344]	1.032e-05	3	12	MET10 MET28 MET17
40°C	sin3∆	Met28	Increased	Inhibitor	Increased	Activator	amino acid transport [GO:0006865]	1.624e-05	4	42	MUP1 MUP3 MMP1 SAM3
40°C	sin3∆	Sip4	Increased	Inhibitor	Increased	Activator	No enrichment
40°C	srb2∆	Hac1	Decreased	Activator	Decreased	Activator	ER-associated protein catabolic process [GO:0030433]	2.568e-06	7	48	DER1 URH1 HUL5 UFD1 DOG2 KAR2 ADD37
40°C	srb2∆	Hac1	Decreased	Activator	Decreased	Activator	response to unfolded protein [GO:0006986]	8.649e-06	4	11	HAC1 ULI1 KAR2 LHS1
40°C	srb2∆	Hac1	Decreased	Activator	Decreased	Activator	glucose metabolic process [GO:0006006]	9.873e-06	5	23	TOS3 DOG2 DOG1 TDH1 TDH2
40°C	srb2∆	Gsm1	Decreased	Activator	Decreased	Activator	No enrichment
40°C	srb2∆	Stp4	Decreased	Activator	Decreased	Activator	No enrichment
40°C	srb2∆	Pdr8	Decreased	Activator	Decreased	Activator	No enrichment
40°C	srb2∆	Mal13	Decreased	Activator	Decreased	Activator	maltose metabolic process [GO:0000023]	7.563e-06	2	11	MAL13 MAL12
40°C	srb2∆	Pdr3	Decreased	Activator	Increased	Inhibitor	ribosome biogenesis [GO:0042254]	3.269e-10	14	170	SPB1 KRR1 PWP2 NSA1 NOP7 SDA1 GAR1 RIX7 FCF2 UTP14 YTM1 NOP4 NIP7 BMS1
40°C	srb2∆	Pdr3	Decreased	Activator	Increased	Inhibitor	rRNA processing [GO:0006364]	2.016e-09	14	195	SPB1 KRR1 PWP2 NSA1 NOP7 GAR1 FCF2 MDN1 PWP1 UTP14 YTM1 NOP4 NIP7 BMS1
40°C	srb2∆	Pdr3	Decreased	Activator	Increased	Inhibitor	ribosomal large subunit biogenesis [GO:0042273]	9.924e-07	6	37	NSA1 NOP7 SDA1 RIX7 YTM1 NIP7
40°C	srb2∆	Pdr3	Decreased	Activator	Increased	Inhibitor	iron ion homeostasis [GO:0055072]	3.502e-06	5	26	FIT1 SIT1 FTR1 FET3 FIT2
40°C	srb2∆	Pdr3	Decreased	Activator	Decreased	Activator	oxidation-reduction process [GO:0055114]	4.345e-07	18	272	BDH2 GDH3 ADH5 GPX2 YDL124W DIT2 GRE3 OYE2 TDH1 TDH2 YKL071W ERO1 FMS1 YNL134C ZWF1 AAD14 GRE2 FRE7
40°C	srb2∆	Pdr3	Decreased	Activator	Decreased	Activator	disaccharide catabolic process [GO:0046352]	1.066e-06	4	6	IMA1 IMA3 IMA4 IMA2
40°C	srb2∆	Pdr3	Decreased	Activator	Decreased	Activator	glucose metabolic process [GO:0006006]	1.494e-06	6	23	TOS3 DOG1 TDH1 TDH2 PGM2 ZWF1
40°C	srb2∆	Pdr3	Decreased	Activator	Decreased	Activator	carbohydrate metabolic process [GO:0005975]	3.061e-06	10	94	GAL7 EMI2 IMA1 MAL12 SGA1 GAS2 PGM2 ZWF1 IMA2 GDB1
40°C	srb2∆	Pdr3	Decreased	Activator	Decreased	Activator	metabolic process [GO:0008152]	5.241e-06	21	425	BDH2 GDH3 ADH5 HNT2 IMA1 MAL12 DOG1 OYE2 SGA1 TDH1 INO1 TDH2 YKL071W YLR345W PLB1 SPO1 YNL134C ZWF1 GRE2 IMA2 GDB1
40°C	srb2∆	Cup9	Increased	Inhibitor	Increased	Activator	ribosome biogenesis [GO:0042254]	1.491e-06	10	170	KRR1 MAK21 ESF1 FAF1 ALB1 UTP11 FCF2 UTP14 NOP4 NIP7
40°C	srb2∆	Cup9	Increased	Inhibitor	Decreased	Inhibitor	gluconeogenesis [GO:0006094]	2.415e-06	4	18	ENO1 ENO2 TDH1 TDH2
40°C	srb2∆	Cup9	Increased	Inhibitor	Decreased	Inhibitor	glycolysis [GO:0006096]	1.552e-05	4	28	ENO1 ENO2 TDH1 TDH2
40°C	srb2∆	Ixr1	Increased	Inhibitor	Increased	Activator	amino acid transmembrane transport [GO:0003333]	4.944e-09	7	24	BAP3 MUP1 MUP3 LYP1 PUT4 DIP5 SAM3
40°C	srb2∆	Ixr1	Increased	Inhibitor	Increased	Activator	branched chain family amino acid biosynthetic process [GO:0009082]	1.851e-07	5	13	ILV6 BAT1 ILV3 ILV2 LEU9
40°C	srb2∆	Ixr1	Increased	Inhibitor	Increased	Activator	amino acid transport [GO:0006865]	3.282e-07	7	42	BAP3 MUP1 MUP3 LYP1 PUT4 DIP5 SAM3
40°C	srb2∆	Ixr1	Increased	Inhibitor	Increased	Activator	transmembrane transport [GO:0055085]	9.324e-07	15	303	PET9 CTP1 PHO87 BAP3 MUP1 MUP3 ARN2 PHO90 HXT2 AQR1 LYP1 PUT4 DIP5 SAM3 OPT2
40°C	srb2∆	Ixr1	Increased	Inhibitor	Increased	Activator	cellular amino acid biosynthetic process [GO:0008652]	1.202e-06	9	98	ILV6 HIS4 SER3 IRC7 BAT1 ILV3 ILV2 LEU9 ASN1
40°C	srb2∆	Swi5	Increased	Inhibitor	Increased	Activator	ribosome biogenesis [GO:0042254]	8.925e-12	20	170	SPB1 KRR1 PWP2 NOP14 MAK21 ESF1 NOP7 SDA1 GAR1 RIX7 FCF2 DIP2 UTP14 HAS1 NOP2 PUS7 YTM1 NOP4 NIP7 BMS1
40°C	srb2∆	Swi5	Increased	Inhibitor	Increased	Activator	rRNA processing [GO:0006364]	1.135e-10	20	195	SPB1 KRR1 PWP2 NOP14 ESF1 NOP7 MTR3 GAR1 FCF2 MDN1 DIP2 PWP1 UTP14 HAS1 NOP2 PUS7 YTM1 NOP4 NIP7 BMS1
40°C	srb2∆	Swi5	Increased	Inhibitor	Increased	Activator	amino acid transmembrane transport [GO:0003333]	1.164e-07	7	24	BAP3 MUP1 MUP3 GAP1 PUT4 DIP5 SAM3
40°C	srb2∆	Swi5	Increased	Inhibitor	Increased	Activator	ribosomal large subunit assembly [GO:0000027]	3.464e-06	7	38	RSA4 MAK21 LSG1 SQT1 YVH1 MDN1 NIP7
40°C	srb2∆	Swi5	Increased	Inhibitor	Increased	Activator	endonucleolytic cleavage in ITS1 to separate SSU-rRNA from 5.8S rRNA and LSU-rRNA from tricistronic rRNA transcript (SSU-rRNA, 5.8S rRNA, LSU-rRNA) [GO:0000447]	4.971e-06	7	40	KRR1 BUD23 PWP2 NOP14 FCF2 DIP2 UTP14
40°C	srb2∆	Swi5	Increased	Inhibitor	Increased	Activator	amino acid transport [GO:0006865]	6.987e-06	7	42	BAP3 MUP1 MUP3 GAP1 PUT4 DIP5 SAM3
40°C	srb2∆	Swi5	Increased	Inhibitor	Increased	Activator	cellular amino acid biosynthetic process [GO:0008652]	7.249e-06	10	98	THR4 SER3 MET6 YHR033W BAT1 ILV3 MET17 ILV2 LEU9 ASN1
40°C	srb2∆	Swi5	Increased	Inhibitor	Decreased	Inhibitor	carbohydrate metabolic process [GO:0005975]	4.321e-06	11	94	GAL7 GAL1 EMI2 IMA1 GUT1 SGA1 GAS2 PGM2 ZWF1 IMA2 GDB1
40°C	srb2∆	Swi5	Increased	Inhibitor	Decreased	Inhibitor	oxidation-reduction process [GO:0055114]	4.344e-06	19	272	BDH2 GDH3 UGA2 ETR1 ADH5 GPX2 YDL124W TSA2 DSF1 FMO1 OYE2 TDH1 TDH2 YJR149W ERO1 FMS1 ZWF1 GRE2 FRE7
40°C	srb2∆	Stp1	Increased	Inhibitor	Increased	Activator	siderophore transport [GO:0015891]	2.658e-10	5	8	FIT1 SIT1 ARN2 FIT2 FIT3
40°C	srb2∆	Stp1	Increased	Inhibitor	Increased	Activator	iron ion homeostasis [GO:0055072]	2.896e-07	5	26	FIT1 SIT1 ARN2 FIT2 FIT3
40°C	srb2∆	Stp1	Increased	Inhibitor	Increased	Activator	cellular iron ion homeostasis [GO:0006879]	7.326e-07	5	31	CCC2 SIT1 ARN2 HMX1 ISU2
40°C	srb2∆	Hcm1	Increased	Inhibitor	Decreased	Inhibitor	de novo NAD biosynthetic process from tryptophan [GO:0034354]	6.874e-06	2	5	BNA4 BNA2
40°C	srb2∆	Kar4	Increased	Inhibitor	Increased	Activator	'de novo' IMP biosynthetic process [GO:0006189]	2.533e-07	4	9	ADE1 ADE17 ADE4 ADE2
40°C	srb2∆	Kar4	Increased	Inhibitor	Increased	Activator	purine nucleotide biosynthetic process [GO:0006164]	5.875e-06	4	18	ADE1 ADE17 ADE4 ADE2
40°C	srb2∆	Kar4	Increased	Inhibitor	Decreased	Inhibitor	ascospore wall assembly [GO:0030476]	3.744e-06	6	46	GIP1 DIT1 SPS1 GAS2 GAS4 MUM3
40°C	srb2∆	Pho4	Increased	Inhibitor	Increased	Activator	iron ion homeostasis [GO:0055072]	2.506e-08	6	26	SIT1 ARN2 FRE1 FET3 FIT2 FIT3
40°C	srb2∆	Pho4	Increased	Inhibitor	Increased	Activator	siderophore transport [GO:0015891]	1.834e-07	4	8	SIT1 ARN2 FIT2 FIT3
40°C	srb2∆	Pho4	Increased	Inhibitor	Increased	Activator	ion transport [GO:0006811]	1.182e-05	7	107	CCC2 SIT1 ARN2 FRE1 FET3 FIT2 FIT3
40°C	srb2∆	Mig1	Increased	Inhibitor	Increased	Activator	siderophore transport [GO:0015891]	5.251e-09	4	8	SIT1 ARN2 FIT2 FIT3
40°C	srb2∆	Mig1	Increased	Inhibitor	Increased	Activator	iron ion homeostasis [GO:0055072]	1.081e-06	4	26	SIT1 ARN2 FIT2 FIT3
40°C	srb2∆	Mig1	Increased	Inhibitor	Increased	Activator	plasma membrane organization [GO:0007009]	9.635e-06	2	2	HSP12 NCE102
40°C	srb2∆	Mig1	Increased	Inhibitor	Decreased	Inhibitor	carbohydrate metabolic process [GO:0005975]	3.434e-08	8	94	GAL1 YBR056W EMI2 IMA1 MAL12 GUT1 YMR085W IMA2
40°C	srb2∆	Mig1	Increased	Inhibitor	Decreased	Inhibitor	metabolic process [GO:0008152]	2.327e-07	13	425	GAL1 YBR056W DSF1 GSY1 IMA1 MAL12 DOG2 TDH1 INO1 BNA1 GRE2 IMA2 MUM3
40°C	srb2∆	Mig1	Increased	Inhibitor	Decreased	Inhibitor	maltose metabolic process [GO:0000023]	2.678e-07	4	11	MAL31 IMA1 MAL12 IMA2
40°C	srb2∆	Mig1	Increased	Inhibitor	Decreased	Inhibitor	disaccharide catabolic process [GO:0046352]	3.203e-06	3	6	IMA1 IMA3 IMA2
40°C	srb2∆	Tup1	Increased	Inhibitor	Increased	Activator	amino acid transmembrane transport [GO:0003333]	2.515e-09	8	24	BAP3 MUP1 MUP3 GAP1 LYP1 PUT4 DIP5 SAM3
40°C	srb2∆	Tup1	Increased	Inhibitor	Increased	Activator	rRNA processing [GO:0006364]	9.662e-08	16	195	RRP7 SPB1 RRP43 NOP14 DBP3 NSA1 NOP7 MTR3 GAR1 UTP11 FCF2 DIP2 PWP1 DIS3 PUS7 NOP4
40°C	srb2∆	Tup1	Increased	Inhibitor	Increased	Activator	ribosome biogenesis [GO:0042254]	9.671e-08	15	170	RRP7 SPB1 NOP14 MAK21 DBP3 NSA1 NOP7 GAR1 FAF1 ALB1 UTP11 FCF2 DIP2 PUS7 NOP4
40°C	srb2∆	Tup1	Increased	Inhibitor	Increased	Activator	'de novo' IMP biosynthetic process [GO:0006189]	1.337e-07	5	9	ADE1 ADE6 ADE13 ADE17 ADE4
40°C	srb2∆	Tup1	Increased	Inhibitor	Increased	Activator	purine nucleotide biosynthetic process [GO:0006164]	2.785e-07	6	18	ADE1 ADE6 MTD1 ADE13 ADE17 ADE4
40°C	srb2∆	Tup1	Increased	Inhibitor	Increased	Activator	amino acid transport [GO:0006865]	3.154e-07	8	42	BAP3 MUP1 MUP3 GAP1 LYP1 PUT4 DIP5 SAM3
40°C	srb2∆	Tup1	Increased	Inhibitor	Increased	Activator	cellular amino acid biosynthetic process [GO:0008652]	4.128e-06	10	98	HIS7 ILV6 HIS4 THR4 IRC7 YHR033W BAT1 ILV3 ILV2 ASN1
40°C	srb2∆	Tup1	Increased	Inhibitor	Decreased	Inhibitor	carbohydrate metabolic process [GO:0005975]	1.906e-07	12	94	YBR056W EMI2 IMA1 MAL12 GUT1 SGA1 GAS2 YMR085W PGM2 YNR071C IMA2 GDB1
40°C	srb2∆	Tup1	Increased	Inhibitor	Decreased	Inhibitor	disaccharide catabolic process [GO:0046352]	1.901e-06	4	6	IMA1 IMA3 IMA4 IMA2
40°C	srb2∆	Tup1	Increased	Inhibitor	Decreased	Inhibitor	metabolic process [GO:0008152]	1.61e-05	22	425	BDH2 BNA4 UGA2 YBR056W ADH5 URH1 GSY1 IMA1 MAL12 DOG1 OYE2 SGA1 TDH1 CPS1 YJR149W SOR1 YKL071W PLB1 YNL134C GRE2 IMA2 GDB1
40°C	mig1∆	Hac1	Decreased	Activator	Increased	Inhibitor	transmembrane transport [GO:0055085]	3.561e-06	9	303	PHO89 HXT3 ATO3 SIT1 FCY2 HXT4 OPT1 JEN1 HXT2
40°C	mig1∆	Hac1	Decreased	Activator	Decreased	Activator	protein folding [GO:0006457]	1.53e-05	6	96	PDI1 EUG1 TSA1 ERO1 MPD1 HSP82
40°C	mig1∆	Cat8	Increased	Inhibitor	Decreased	Inhibitor	No enrichment
40°C	mig1∆	Ixr1	Increased	Inhibitor	Increased	Activator	glucose transport [GO:0015758]	9.219e-08	4	7	MTH1 HXT1 HXT5 HXT2
40°C	mig1∆	Ixr1	Increased	Inhibitor	Increased	Activator	transmembrane transport [GO:0055085]	1.403e-06	12	303	PHO89 HXT3 ATO3 ARN2 HXT4 HXT1 HXT5 QDR2 HXT2 AQR1 NRT1 PUT4
40°C	mig1∆	Ixr1	Increased	Inhibitor	Increased	Activator	carbohydrate transport [GO:0008643]	2.684e-06	5	31	HXT3 HXT4 HXT1 HXT5 HXT2
40°C	mig1∆	Ixr1	Increased	Inhibitor	Increased	Activator	siderophore transport [GO:0015891]	2.096e-05	3	8	FIT1 ARN2 FIT3
40°C	mig1∆	Msn4	Increased	Inhibitor	Increased	Activator	iron ion homeostasis [GO:0055072]	3.052e-09	8	26	FIT1 FTR1 ARN1 ARN2 FRE1 FET3 FRE4 FIT2
40°C	mig1∆	Msn4	Increased	Inhibitor	Increased	Activator	siderophore transport [GO:0015891]	4.304e-08	5	8	FIT1 ARN1 ARN2 FRE4 FIT2
40°C	mig1∆	Msn4	Increased	Inhibitor	Increased	Activator	ion transport [GO:0006811]	7.044e-08	12	107	CCC2 FIT1 FTR1 ARN1 ARN2 QDR2 FRE1 CTR3 FET3 FRE4 FIT2 CTR1
40°C	mig1∆	Msn4	Increased	Inhibitor	Increased	Activator	transmembrane transport [GO:0055085]	6.689e-07	18	303	PHO89 CCC2 HXT3 FCY2 FTR1 TNA1 VMR1 ARN2 HXT4 HXT1 HXT5 QDR2 STE6 VBA5 PHO84 HXT2 AQR1 PUT4
40°C	mig1∆	Msn4	Increased	Inhibitor	Increased	Activator	response to pheromone [GO:0019236]	1.11e-05	6	34	STE2 STE12 BAR1 STE6 SST2 PRM1
40°C	mig1∆	Msn4	Increased	Inhibitor	Decreased	Inhibitor	protein folding [GO:0006457]	5.96e-09	9	96	SSA1 HSP26 CPR1 CPR6 ERO1 HSC82 HCH1 STI1 HSP82
40°C	mig1∆	Msn4	Increased	Inhibitor	Decreased	Inhibitor	protein refolding [GO:0042026]	2.436e-06	4	16	SSA1 CPR6 HSC82 HSP82
40°C	mig1∆	Msn4	Increased	Inhibitor	Decreased	Inhibitor	response to stress [GO:0006950]	3.985e-06	8	152	SSA1 HSP26 GRE3 KAR2 HSC82 HCH1 STI1 HSP82
40°C	mig1∆	Rpn4	Increased	Inhibitor	Increased	Activator	iron ion homeostasis [GO:0055072]	9.889e-11	8	26	FIT1 ARN1 ARN2 FRE2 FRE1 FET3 FIT2 FIT3
40°C	mig1∆	Rpn4	Increased	Inhibitor	Increased	Activator	siderophore transport [GO:0015891]	5.058e-09	5	8	FIT1 ARN1 ARN2 FIT2 FIT3
40°C	mig1∆	Rpn4	Increased	Inhibitor	Increased	Activator	ion transport [GO:0006811]	9.376e-08	10	107	CCC2 FIT1 ARN1 ARN2 QDR2 FRE2 FRE1 FET3 FIT2 FIT3
40°C	mig1∆	Rpn4	Increased	Inhibitor	Increased	Activator	conjugation [GO:0000746]	9.844e-06	3	5	FUS3 HBT1 PRM1
40°C	mig1∆	Rpn4	Increased	Inhibitor	Increased	Activator	oxidation-reduction process [GO:0055114]	1.479e-05	12	272	GDH2 YGL039W IMD2 GUT2 MAE1 SRX1 FRE2 PUT1 FRE1 FET3 NDE1 ALD6
40°C	mig1∆	Rpn4	Increased	Inhibitor	Increased	Activator	response to pheromone [GO:0019236]	2.049e-05	5	34	STE2 GPA1 BAR1 SST2 PRM1
40°C	mig1∆	Rpn4	Increased	Inhibitor	Decreased	Inhibitor	protein folding [GO:0006457]	5.74e-10	9	96	SSA1 HSP26 PDI1 CPR1 AHA1 TSA1 ERO1 MPD1 HSP82
40°C	mig1∆	Mal33	Increased	Inhibitor	Decreased	Inhibitor	'de novo' protein folding [GO:0006458]	1.442e-05	2	6	HSC82 HSP82
40°C	mig1∆	Kar4	Increased	Inhibitor	Increased	Activator	conjugation [GO:0000746]	9.367e-09	4	5	FUS3 FIG2 HBT1 PRM1
40°C	mig1∆	Kar4	Increased	Inhibitor	Increased	Activator	cytogamy [GO:0000755]	1.292e-07	4	8	FIG1 FUS1 FIG2 STE2
40°C	mig1∆	Kar4	Increased	Inhibitor	Increased	Activator	response to pheromone [GO:0019236]	2.811e-06	5	34	FIG2 STE2 BAR1 STE6 PRM1
40°C	mig1∆	Adr1	Increased	Inhibitor	Increased	Activator	No enrichment
40°C	mig1∆	Mth1	Increased	Inhibitor	Increased	Activator	No enrichment
30°C	sin3∆	Hap3	Decreased	Activator	Increased	Inhibitor	cellular amino acid biosynthetic process [GO:0008652]	2.651e-06	6	98	HIS7 LEU2 ARG4 BAT2 SER1 ASN1
30°C	sin3∆	Mot3	Decreased	Activator	Increased	Inhibitor	iron ion homeostasis [GO:0055072]	9.428e-07	7	26	SIT1 FTR1 FRE1 FET3 FRE4 ENB1 FIT3
30°C	sin3∆	Mot3	Decreased	Activator	Increased	Inhibitor	cellular amino acid biosynthetic process [GO:0008652]	1.19e-06	12	98	LEU2 LYS21 UTR4 HIS1 BAT1 LYS12 ARG3 ILV3 CPA2 LEU4 ARG1 CPA1
30°C	sin3∆	Mot3	Decreased	Activator	Increased	Inhibitor	ion transport [GO:0006811]	3.069e-06	12	107	ATO3 SIT1 FTR1 ZRT1 VMA7 POR2 QDR2 FRE1 FET3 FRE4 ENB1 FIT3
30°C	sin3∆	Mot3	Decreased	Activator	Increased	Inhibitor	ergosterol biosynthetic process [GO:0006696]	7.206e-06	6	23	ERG28 ERG11 ERG3 ERG6 HMG1 ERG2
30°C	sin3∆	Mot3	Decreased	Activator	Increased	Inhibitor	steroid biosynthetic process [GO:0006694]	1.219e-05	6	25	ERG28 ERG11 ERG3 ERG6 HMG1 ERG2
30°C	sin3∆	Mot3	Decreased	Activator	Increased	Inhibitor	oxidation-reduction process [GO:0055114]	2.242e-05	18	272	LEU2 DLD3 ALD5 YGL039W YHB1 ERG11 IMD2 LYS12 MAE1 ERG3 FRE1 DUS3 YLR460C HMG1 FET3 IDH1 FRE4 GDH1
30°C	sin3∆	Mot3	Decreased	Activator	Decreased	Activator	ATP synthesis coupled proton transport [GO:0015986]	6.536e-08	7	17	ATP1 ATP3 ATP5 ATP17 ATP2 ATP7 ATP15
30°C	sin3∆	Mot3	Decreased	Activator	Decreased	Activator	ATP biosynthetic process [GO:0006754]	4.67e-07	8	31	ATP1 ATP3 ATP5 ATP17 SPF1 ATP2 ATP7 ATP15
30°C	sin3∆	Mot3	Decreased	Activator	Decreased	Activator	glycogen catabolic process [GO:0005980]	1.371e-05	3	3	SGA1 GPH1 GDB1
30°C	sin3∆	Sok2	Decreased	Activator	Increased	Inhibitor	cellular amino acid biosynthetic process [GO:0008652]	<1e-14	46	98	LYS2 HIS7 ARO4 ILV6 LEU2 HIS4 THR4 CTR86 LYS21 ARO3 ARO1 LYS4 TRP4 HOM3 HIS1 SER3 ILV1 TRP2 MET6 IRC7 TRP5 SER2 ARG4 THR1 BAT1 LYS12 HIS5 MET28 LYS1 ARG3 ILV3 CPA2 BAT2 TRP3 YML096W ARG7 LEU4 LYS9 ARG1 LEU9 ORT1 SER1 HIS3 SAM4 ARO7 ASN1
30°C	sin3∆	Sok2	Decreased	Activator	Increased	Inhibitor	ribosome biogenesis [GO:0042254]	<1e-14	41	170	RPS9B ENP1 REI1 RRP7 SPB1 PWP2 NOP1 NOP14 UTP4 SNU13 CGR1 DBP3 ROK1 SLX9 RPS0A RRP3 IMP3 RIX1 UTP25 UTP18 TOR1 MRT4 RPL40B RLP24 DIP2 EMG1 UTP13 UTP21 ERB1 UTP15 RRB1 HAS1 NOP2 NOG2 NOP12 BRX1 YTM1 RRP36 RPS9A NIP7 RRP9
30°C	sin3∆	Sok2	Decreased	Activator	Increased	Inhibitor	metabolic process [GO:0008152]	<1e-14	63	425	ACS1 BNA4 UGA2 ZTA1 LYS2 ADH5 HIS7 ARO4 ILV6 HIS4 APA1 CHA1 THR4 LYS21 ARO3 ARO1 LYS4 TRP4 URA3 HOM3 ALD5 SER3 ILV1 TMT1 TRP5 SCW11 YGL039W SER2 BIO2 ARD1 BAT1 IMD2 FAA3 HIS5 URA2 ACO2 ILV3 CPA2 BAT2 YJR149W MAE1 TRP3 CTS1 ACO1 DUS3 YLR460C ERG6 ERG13 YML131W PLB2 ARG7 ERG12 ADH6 LEU4 NRK1 LYS9 DSE4 LEU9 SER1 YPK9 GDH1 ERG10 ARO7
30°C	sin3∆	Sok2	Decreased	Activator	Increased	Inhibitor	rRNA processing [GO:0006364]	7.494e-14	39	195	RPS9B ENP1 RRP7 SPB1 PWP2 NOP1 NOP14 UTP4 SNU13 CGR1 DBP3 ROK1 SLX9 RPS0A EFG1 RRP3 IMP3 RIX1 UTP25 UTP18 MRT4 DIP2 EMG1 PWP1 UTP13 UTP21 TSR2 ERB1 UTP15 RRB1 HAS1 NOP2 NOP12 YTM1 RRP36 RPS9A MOT1 NIP7 RRP9
30°C	sin3∆	Sok2	Decreased	Activator	Increased	Inhibitor	maturation of SSU-rRNA from tricistronic rRNA transcript (SSU-rRNA, 5.8S rRNA, LSU-rRNA) [GO:0000462]	6.28e-12	20	60	RPS11B RPS9B PWP2 NOP14 RPS11A UTP4 SNU13 RPS8B SLX9 EFG1 RRP3 RPS24B UTP25 DIP2 UTP13 TSR2 RPS1A UTP15 RRP36 RPS9A
30°C	sin3∆	Sok2	Decreased	Activator	Increased	Inhibitor	translation [GO:0006412]	9.548e-10	44	318	MAK16 RBG1 RPS11B RPL19A RPS9B SRO9 RPL31A RPP1B RPL35A RPL4B RPS11A KRS1 YDR341C RPS17B RPL12A RPL34A RPS8B RPL22B RPL2A RPL9A TYS1 RPS0A RPL14B DED81 YHR020W RPS24B MEF2 RPL17B RPS22A RPL43B RPL40B RLP24 RPL31B RPS1A RPL6B RPS18B RPL6A RPL18B BRX1 RPL18A RPS19A GLN4 RPS10A RPS9A
30°C	sin3∆	Sok2	Decreased	Activator	Increased	Inhibitor	aromatic amino acid family biosynthetic process [GO:0009073]	1.883e-08	8	12	ARO4 ARO3 ARO1 TRP4 TRP2 TRP5 TRP3 ARO7
30°C	sin3∆	Sok2	Decreased	Activator	Increased	Inhibitor	branched chain family amino acid biosynthetic process [GO:0009082]	4.677e-08	8	13	ILV6 LEU2 ILV1 BAT1 ILV3 BAT2 LEU4 LEU9
30°C	sin3∆	Sok2	Decreased	Activator	Increased	Inhibitor	ergosterol biosynthetic process [GO:0006696]	7.216e-08	10	23	ERG28 ERG11 ERG3 ERG6 HMG1 ERG13 ERG2 ERG12 ERG24 ERG10
30°C	sin3∆	Sok2	Decreased	Activator	Increased	Inhibitor	steroid biosynthetic process [GO:0006694]	1.879e-07	10	25	ERG28 ERG11 ERG3 ERG6 HMG1 ERG13 ERG2 ERG12 ERG24 IDI1
30°C	sin3∆	Sok2	Decreased	Activator	Increased	Inhibitor	lysine biosynthetic process [GO:0009085]	4.579e-07	6	8	LYS2 LYS21 LYS4 LYS12 LYS1 LYS9
30°C	sin3∆	Sok2	Decreased	Activator	Increased	Inhibitor	sterol biosynthetic process [GO:0016126]	9.565e-07	10	29	ERG28 ERG11 ERG3 ERG6 HMG1 ERG13 ERG2 ERG12 ERG24 IDI1
30°C	sin3∆	Sok2	Decreased	Activator	Increased	Inhibitor	oxidation-reduction process [GO:0055114]	2.985e-06	33	272	BNA4 UGA2 ZTA1 LYS2 ADH5 LEU2 HIS4 ARO1 DLD3 ALD5 SER3 YGL039W MET13 ADH4 YHB1 ERG11 IMD2 LYS12 LYS1 YJR149W MAE1 ERG3 DUS3 YLR460C HMG1 YML131W FET3 ADH6 ERG24 LYS9 FRE4 GDH1 FRE3
30°C	sin3∆	Sok2	Decreased	Activator	Increased	Inhibitor	arginine biosynthetic process [GO:0006526]	3.143e-06	6	10	ARG4 ARG3 CPA2 ARG7 ARG1 ORT1
30°C	sin3∆	Sok2	Decreased	Activator	Increased	Inhibitor	iron ion homeostasis [GO:0055072]	3.282e-06	9	26	FTR1 ARN1 FET3 FET4 FRE4 ENB1 FRE3 FIT2 FIT3
30°C	sin3∆	Sok2	Decreased	Activator	Increased	Inhibitor	histidine biosynthetic process [GO:0000105]	6.616e-06	6	11	HIS7 HIS4 HIS1 HIS5 BAS1 HIS3
30°C	sin3∆	Sok2	Decreased	Activator	Increased	Inhibitor	ribosomal large subunit assembly [GO:0000027]	1.489e-05	10	38	RSA4 RPL12A DBP3 RIX1 YVH1 MRT4 RPL6B RPL6A BRX1 NIP7
30°C	sin3∆	Sok2	Decreased	Activator	Increased	Inhibitor	cellular amino acid metabolic process [GO:0006520]	1.683e-05	9	31	CHA1 THR4 GLY1 ILV1 IRC7 ARG3 URA2 MAE1 GDH1
30°C	sin3∆	Sok2	Decreased	Activator	Increased	Inhibitor	siderophore transport [GO:0015891]	1.732e-05	5	8	ARN1 FRE4 FRE3 FIT2 FIT3
30°C	sin3∆	Sok2	Decreased	Activator	Increased	Inhibitor	lysine biosynthetic process via aminoadipic acid [GO:0019878]	1.732e-05	5	8	LYS2 LYS21 LYS4 LYS1 LYS9
30°C	sin3∆	Sok2	Decreased	Activator	Decreased	Activator	oxidation-reduction process [GO:0055114]	4.912e-09	38	272	BDH2 ARA1 YDL114W YDL124W YDR541C ARI1 POX1 CTT1 COQ6 GND2 GRE3 OYE2 RNR3 KGD1 BNA1 BNA2 YJR096W RSM26 AAD10 GPX1 FMP46 SDH2 COX8 TDA5 TSA1 CYB2 NDI1 ERO1 FMS1 ALD3 IDP3 SPS19 GPD2 FRE7 GCY1 ALD4 OYE3 YPR127W
30°C	sin3∆	Sok2	Decreased	Activator	Decreased	Activator	metabolic process [GO:0008152]	5.022e-08	48	425	BDH2 TKL2 GPM2 YDL114W NTH1 ENA5 TPS2 URH1 APA2 YDR541C PHM8 SEC53 SNZ3 GSY1 PMC1 PNC1 AMS1 ARI1 POX1 NQM1 COQ6 GND2 SCW4 OYE2 RNR3 SGA1 KGD1 POT1 INO1 BNA1 PGU1 MCD4 SRY1 PDC5 GSY2 YLR345W TDA5 CYB2 YMR090W ALD3 SCW10 SPS19 SNZ2 GPD2 SPR1 ALD4 OYE3 GDB1
30°C	sin3∆	Sok2	Decreased	Activator	Decreased	Activator	ATP synthesis coupled proton transport [GO:0015986]	5.856e-07	8	17	ATP1 ATP3 ATP5 ATP17 ATP2 ATP7 ATP4 ATP15
30°C	sin3∆	Sok2	Decreased	Activator	Decreased	Activator	response to stress [GO:0006950]	1.532e-06	23	152	HSP26 TPS1 FMP45 NTH1 TPS2 HSP31 SSA4 HSP12 PAU5 CTT1 WSC4 GRE3 FMC1 XBP1 SSC1 DAN4 MSN4 HSP104 ICT1 TSL1 DDR48 ZEO1 GRE1
30°C	sin3∆	Sok2	Decreased	Activator	Decreased	Activator	thiamine biosynthetic process [GO:0009228]	9.208e-06	7	17	THI13 THI5 SNZ3 SNO3 RPI1 THI12 SNZ2
30°C	sin3∆	Sok2	Decreased	Activator	Decreased	Activator	ATP biosynthetic process [GO:0006754]	1.323e-05	9	31	ATP1 ATP3 ENA5 ATP5 ATP17 PMC1 ATP2 ATP7 ATP15
30°C	sin3∆	Sok2	Decreased	Activator	Decreased	Activator	carbohydrate metabolic process [GO:0005975]	1.372e-05	16	94	EMI2 GLC3 AMS1 NQM1 SOL4 SCW4 PKP1 PCL7 SGA1 PGU1 PGM2 SCW10 GPD2 SPR1 GPH1 GDB1
30°C	sin3∆	Sok2	Decreased	Activator	Decreased	Activator	ion transport [GO:0006811]	1.901e-05	17	107	ATP1 ATP3 YRO2 YDL206W ENA5 ATP5 ATP17 PMC1 CTR2 ATP2 ATP7 POR1 ATO2 FRE7 MFM1 ATP4 ATP15
30°C	sin3∆	Msn1	Decreased	Activator	Increased	Inhibitor	translation [GO:0006412]	8.498e-13	17	318	RPL23A RPS14A RPP1B RPS13 RPP2B RPL23B RPL27A RPS27B RPL40A RPS22A RPL43B RPL14A RPS21A RPL22A RPL37A RPS28B RPS10A
30°C	sin3∆	Msn1	Decreased	Activator	Increased	Inhibitor	maturation of SSU-rRNA from tricistronic rRNA transcript (SSU-rRNA, 5.8S rRNA, LSU-rRNA) [GO:0000462]	1.317e-06	6	60	RPS14A RPS13 SNU13 UTP22 RPS27B FYV7
30°C	sin3∆	Msn1	Decreased	Activator	Decreased	Activator	response to stress [GO:0006950]	3.043e-06	7	152	TPS1 GPD1 HSP12 CTT1 GRE3 ICT1 DDR48
30°C	sin3∆	Tye7	Decreased	Activator	Increased	Inhibitor	translation [GO:0006412]	<1e-14	63	318	MAK16 RPL19B RPL23A RPL32 RPL4A RPL19A TEF2 RPS6B RPL31A RPS16B RPL35A RPL4B RPS13 RPS17B RPS18A RPL23B RPL22B RPL30 RPL24A RPL28 RPS25A RPL26B TYS1 RPL14B RPL27A DED81 RPS27B RPL34B RPS24B RPL16A RPL40A RPS21B RPS22A RPL43B RPL14A RPS21A RPL40B RLP24 RPL22A RPS31 RPL37A RPS28B RPL38 RPS25B RPP0 RPL31B RPS17A RPS18B RPL6A RPL20A RPS3 RPS19B RPS15 RPS19A RPL25 RPL3 RPS30B RPS10A RPL20B RPS12 RPS6A…
30°C	sin3∆	Tye7	Decreased	Activator	Increased	Inhibitor	ribosome biogenesis [GO:0042254]	9.781e-09	22	170	RPS6B RRP7 SPB1 KRR1 NOP1 UTP6 PXR1 FAF1 RPL40A MRT4 RPL40B RLP24 RPS31 RPP0 RPS15 NOP8 UTP23 RRP36 RRS1 NOP4 RPS6A NIP7
30°C	sin3∆	Tye7	Decreased	Activator	Increased	Inhibitor	rRNA export from nucleus [GO:0006407]	1.006e-06	8	27	RPS18A RPS28B RPS18B RPS3 RPS19B RPS15 RPS19A RPS10A
30°C	sin3∆	Tye7	Decreased	Activator	Increased	Inhibitor	maturation of SSU-rRNA from tricistronic rRNA transcript (SSU-rRNA, 5.8S rRNA, LSU-rRNA) [GO:0000462]	1.783e-06	11	60	RPS6B RPS16B RPS13 UTP6 RPS27B FAF1 RPS24B FYV7 TSR2 RRP36 RPS6A
30°C	sin3∆	Tye7	Decreased	Activator	Increased	Inhibitor	rRNA processing [GO:0006364]	8.452e-06	19	195	RPS6B RRP7 SPB1 KRR1 NOP1 UTP6 RPL30 PXR1 RPS21B MRT4 RPS21A FYV7 TSR2 REX4 UTP23 RRP36 NOP4 RPS6A NIP7
30°C	sin3∆	Tye7	Decreased	Activator	Increased	Inhibitor	cellular amino acid biosynthetic process [GO:0008652]	8.937e-06	13	98	ILV6 LEU2 THR4 LYS21 LYS4 HOM3 ILV1 ARG4 THR1 BAT1 LYS1 BAT2 HIS3
30°C	sin3∆	Tye7	Decreased	Activator	Increased	Inhibitor	ribosomal large subunit assembly [GO:0000027]	1.651e-05	8	38	MRT4 RPF2 RPP0 RPL6A REX4 RPL25 RPL3 NIP7
30°C	sin3∆	Tye7	Decreased	Activator	Decreased	Activator	mitochondrial translation [GO:0032543]	6.18e-07	11	88	MRP10 RSM27 MRP17 MRPL31 MRPL38 MRPL15 MRPL44 SWS2 MRPL50 RSM19 RTC6
30°C	sin3∆	Tye7	Decreased	Activator	Decreased	Activator	posttranslational protein targeting to membrane, translocation [GO:0031204]	1.388e-05	4	9	SEC66 KAR2 SEC72 SEC61
30°C	sin3∆	Gcr1	Decreased	Activator	Increased	Inhibitor	translation [GO:0006412]	<1e-14	115	318	MAK16 RBG1 RPL19B RPS8A RPL23A RPL32 RPL4A RPS11B RPL19A TEF2 RPS6B RPS9B RPS14A RPL31A RPS16B RPP1B RPL35A RPL4B RPS11A RPS13 YDR341C RPP2B RPL12B RPS17B RPS18A HYP2 RPL12A RPL34A RPS24A RPS8B RPL23B RPL22B RPL2A RPL30 RPL24A RPL7A RPL28 RPS2 RPL1B RPL9A RPS25A RPL26B TYS1 RPS0A RPL14B RPS20 RPL27A DED81 YHR020W RPS27B RPS4B RPL2B RPL34B RPS24B RPL16A RPL40A RPS21B RPL17B RPS22A RPS14B ANB1 RPL4…
30°C	sin3∆	Gcr1	Decreased	Activator	Increased	Inhibitor	maturation of SSU-rRNA from tricistronic rRNA transcript (SSU-rRNA, 5.8S rRNA, LSU-rRNA) [GO:0000462]	3.352e-13	21	60	RPS8A RPS11B RPS6B RPS9B RPS14A RPS16B RPS11A RPS13 SNU13 RPS24A RPS8B RPS20 RPS27B RPS24B RPS14B RPS1A RPS1B RPS16A RPS9A RPS6A RPS23B
30°C	sin3∆	Gcr1	Decreased	Activator	Increased	Inhibitor	cellular amino acid biosynthetic process [GO:0008652]	7.926e-13	26	98	ARO4 ILV6 HIS4 THR4 HOM2 TRP4 HOM3 HIS1 SER3 ILV1 TRP2 MET6 IRC7 STR3 SER2 THR1 BAT1 LYS1 ILV3 CPA2 BAT2 ADI1 LYS9 CPA1 SAM4 ASN1
30°C	sin3∆	Gcr1	Decreased	Activator	Increased	Inhibitor	ribosomal small subunit assembly [GO:0000028]	1.315e-12	11	14	RPS11B RPS14A RPS11A RPS17B NSR1 RPS0A RPS27B RPS14B RPS0B RPS31 RPS17A
30°C	sin3∆	Gcr1	Decreased	Activator	Increased	Inhibitor	ribosome biogenesis [GO:0042254]	8.096e-12	33	170	RPS6B RPS9B SPB1 RPS14A NOP1 ESF1 SNU13 RPS2 RPS0A PXR1 IMP3 RPL40A UTP18 RPS14B MRT4 RPL40B RIX7 RPL8B RPS0B RPS31 EMG1 RPP0 RRB1 RRP5 NOG2 RCL1 RPS15 NOP12 BRX1 RPS7A RPS9A RPS6A DIM1
30°C	sin3∆	Gcr1	Decreased	Activator	Increased	Inhibitor	rRNA export from nucleus [GO:0006407]	1.76e-09	12	27	RPS18A RPS2 RPS0A RPS5 RPS0B RPS28B RPS18B RPS3 RPS19B RPS15 RPS19A RPS10A
30°C	sin3∆	Gcr1	Decreased	Activator	Increased	Inhibitor	ribosomal large subunit assembly [GO:0000027]	1.672e-08	13	38	RPL12B RPL12A SQT1 MRT4 RPL10 RPP0 RPL6B RPL6A BRX1 RPL25 RPL3 RPL5 RPL11A
30°C	sin3∆	Gcr1	Decreased	Activator	Increased	Inhibitor	rRNA processing [GO:0006364]	9.254e-08	29	195	RPS6B RPS9B SPB1 RPS14A NOP1 BFR2 ESF1 SNU13 RPL30 RPS2 NSR1 RPS0A PXR1 IMP3 UTP18 RPS21B RPS14B MRT4 RPS21A RPS0B EMG1 PWP1 RRB1 RRP5 NOP12 RPS7A RPS9A RPS6A DIM1
30°C	sin3∆	Gcr1	Decreased	Activator	Increased	Inhibitor	endonucleolytic cleavage to generate mature 3'-end of SSU-rRNA from (SSU-rRNA, 5.8S rRNA, LSU-rRNA) [GO:0000461]	6.131e-06	4	4	RPS0A RPS21B RPS21A RPS0B
30°C	sin3∆	Gcr1	Decreased	Activator	Increased	Inhibitor	translational elongation [GO:0006414]	6.177e-06	8	22	TEF2 RPP1B RPP2B HYP2 ANB1 STM1 RPP0 RPP2A
30°C	sin3∆	Gcr1	Decreased	Activator	Increased	Inhibitor	ergosterol biosynthetic process [GO:0006696]	9.063e-06	8	23	ERG28 ERG4 ERG11 ERG3 ERG6 ERG13 ERG2 ERG10
30°C	sin3∆	Gcr1	Decreased	Activator	Increased	Inhibitor	metabolic process [GO:0008152]	1.258e-05	42	425	UGA2 ADH5 ARO4 ILV6 HIS4 APA1 CHA1 THR4 HOM2 TRP4 URA3 HOM3 ALD5 SER3 ILV1 SCW11 PYC1 SDT1 SER2 BIO2 BAT1 IMD2 URA2 ACO2 ILV3 CPA2 BAT2 YJR149W MAE1 YKL033W-A OAR1 CTS1 ACO1 CAR2 ERG6 ERG13 PLB2 SNZ1 ADH6 IDH1 LYS9 ERG10
30°C	sin3∆	Gcr1	Decreased	Activator	Increased	Inhibitor	cellular amino acid metabolic process [GO:0006520]	1.323e-05	9	31	CHA1 THR4 HOM2 GLY1 ILV1 IRC7 STR3 URA2 MAE1
30°C	sin3∆	Gcr1	Decreased	Activator	Increased	Inhibitor	steroid biosynthetic process [GO:0006694]	1.831e-05	8	25	ERG28 ERG4 ERG11 ERG3 ERG6 ERG13 ERG2 IDI1
30°C	sin3∆	Gcr1	Decreased	Activator	Increased	Inhibitor	endonucleolytic cleavage in ITS1 to separate SSU-rRNA from 5.8S rRNA and LSU-rRNA from tricistronic rRNA transcript (SSU-rRNA, 5.8S rRNA, LSU-rRNA) [GO:0000447]	1.877e-05	10	40	RPS18A RPS0A UTP18 RPS21B RPS21A RPS0B EMG1 RPS18B RRP5 RCL1
30°C	sin3∆	Gcr1	Decreased	Activator	Decreased	Activator	ATP synthesis coupled proton transport [GO:0015986]	8.24e-09	8	17	ATP1 ATP3 ATP5 ATP17 ATP2 ATP7 ATP4 ATP15
30°C	sin3∆	Gcr1	Decreased	Activator	Decreased	Activator	posttranslational protein targeting to membrane, translocation [GO:0031204]	4.235e-08	6	9	SEC66 KAR2 LHS1 SEC61 SEC63 SEC62
30°C	sin3∆	Gcr1	Decreased	Activator	Decreased	Activator	oxidation-reduction process [GO:0055114]	8.456e-07	24	272	BDH1 GPD1 YDL124W DIT2 ARI1 CTT1 COQ6 GND2 AIM17 OYE2 TDH1 BNA1 BNA2 MCR1 SDH2 COX8 TSA1 CYB2 NDI1 FMS1 ALD3 SPS19 MDH2 ALD4
30°C	sin3∆	Gcr1	Decreased	Activator	Decreased	Activator	metabolic process [GO:0008152]	3.836e-06	30	425	BDH1 NTH2 TKL2 GPM2 GPD1 IPT1 URH1 PHM8 SEC53 GSY1 PNC1 AMS1 ARI1 NQM1 COQ6 GND2 OYE2 TDH1 BNA1 ADE16 PDC5 BNA5 CYB2 YMR090W ALD3 SCW10 SPS19 MDH2 SPR1 ALD4
30°C	sin3∆	Gcr1	Decreased	Activator	Decreased	Activator	response to unfolded protein [GO:0006986]	7.709e-06	5	11	HAC1 ULI1 KAR2 LHS1 ORM2
30°C	sin3∆	Gcr1	Decreased	Activator	Decreased	Activator	carbohydrate metabolic process [GO:0005975]	1.454e-05	12	94	GLK1 GPD1 GLC3 PMI40 AMS1 NQM1 SOL4 PCL7 PGM2 SCW10 MDH2 SPR1
30°C	sin3∆	Gcr1	Decreased	Activator	Decreased	Activator	proton transport [GO:0015992]	1.783e-05	8	41	ATP1 ATP3 ATP5 ATP17 ATP2 ATP7 ATP4 ATP15
30°C	sin3∆	Gcr1	Decreased	Activator	Decreased	Activator	ATP biosynthetic process [GO:0006754]	2.214e-05	7	31	ATP1 ATP3 ATP5 ATP17 ATP2 ATP7 ATP15
30°C	sin3∆	Ino4	Decreased	Activator	Increased	Inhibitor	rRNA processing [GO:0006364]	1.527e-05	13	195	NOP1 BFR2 ESF1 UTP6 CGR1 NSR1 PXR1 RIX1 DHR2 DBP7 RRP5 RNT1 MOT1
30°C	sin3∆	Ino4	Decreased	Activator	Decreased	Activator	mitochondrial translation [GO:0032543]	<1e-14	23	88	MRPL16 MRPS9 RSM10 MRP20 MRF1 RRF1 RSM25 MRPL8 RSM26 RSM7 MRP17 MRPL31 MRPL38 MRPL15 MRPS8 MSK1 SWS2 NAM9 MRPL50 RSM19 IFM1 MRPL23 MRP2
30°C	sin3∆	Mss11	Decreased	Activator	Increased	Inhibitor	translation [GO:0006412]	<1e-14	33	318	RPL19B RPL32 RPL19A RPS6B RPS9B RPL31A RPS17B RPL34A RPL22B RPL24A RPL28 RPS25A RPS20 RPL27A RPL34B RPL15A RPL22A RPL10 RPS31 RPL38 RPS25B RPS1A RPS17A RPS1B RPL6A RPL13B RPS19B RPS19A RPL25 RPL21B RPS9A RPS6A RPL36B
30°C	sin3∆	Mss11	Decreased	Activator	Increased	Inhibitor	maturation of SSU-rRNA from tricistronic rRNA transcript (SSU-rRNA, 5.8S rRNA, LSU-rRNA) [GO:0000462]	1.478e-05	8	60	RPS6B RPS9B UTP22 RPS20 RPS1A RPS1B RPS9A RPS6A
30°C	sin3∆	Cin5	Decreased	Activator	Increased	Inhibitor	translation [GO:0006412]	<1e-14	55	318	FMT1 RPL19B RPL23A RPL32 RPL4A RPL19A TEF2 RPL31A RPS16B RPL35A RPL4B RPS17B RPS18A RPL23B RPL22B RPL30 RPL24A RPL28 RPS25A RPL26B TYS1 RPL14B RPL27A RPS27B RPS24B RPL16A RPL40A MEF2 RPS21B RPL43B RPL14A RPS21A RPL40B RPL22A RPS31 RPL37A RPS28B RPL38 RPS25B RPP0 RPL31B RPS17A RPS18B RPL20A RPS3 RPS19B RPS15 RPS19A RPL25 RPS30B RPS10A RPL20B RPS12 DBP1 RPL43A
30°C	sin3∆	Cin5	Decreased	Activator	Increased	Inhibitor	rRNA export from nucleus [GO:0006407]	1.252e-06	8	27	RPS18A RPS28B RPS18B RPS3 RPS19B RPS15 RPS19A RPS10A
30°C	sin3∆	Ndt80	Decreased	Activator	Increased	Inhibitor	ribosome biogenesis [GO:0042254]	4.371e-12	21	170	RPS9B ENP1 SNU13 NOP7 RPS0A PXR1 RPS0B EMG1 UTP13 RPP0 ERB1 UTP15 HAS1 NOP2 NAF1 RCL1 BRX1 UTP23 YTM1 NOP4 DIM1
30°C	sin3∆	Ndt80	Decreased	Activator	Increased	Inhibitor	rRNA processing [GO:0006364]	4.578e-10	20	195	RPS9B ENP1 SNU13 NOP7 NSR1 RPS0A PXR1 RPS0B EMG1 PWP1 UTP13 ERB1 UTP15 HAS1 NOP2 NAF1 UTP23 YTM1 NOP4 DIM1
30°C	sin3∆	Ndt80	Decreased	Activator	Increased	Inhibitor	translation [GO:0006412]	3.928e-09	24	318	RBG1 TEF2 RPS9B RPS13 YDR341C HYP2 RPL28 RPL1B RPS0A YHR020W RPL2B RPL16A RPL17B ANB1 RPS4A RPS0B RPS28B RPP0 RPL16B RPL18B BRX1 RPL3 RPL7B HTS1
30°C	sin3∆	Ndt80	Decreased	Activator	Increased	Inhibitor	endonucleolytic cleavage in ITS1 to separate SSU-rRNA from 5.8S rRNA and LSU-rRNA from tricistronic rRNA transcript (SSU-rRNA, 5.8S rRNA, LSU-rRNA) [GO:0000447]	8.169e-06	7	40	ENP1 RPS0A RPS0B EMG1 UTP13 RCL1 UTP23
30°C	sin3∆	Tec1	Decreased	Activator	Increased	Inhibitor	ribosome biogenesis [GO:0042254]	<1e-14	47	170	RPS14A PWP2 NOP14 FAL1 ESF1 NUG1 NSA1 RPS2 UTP22 NOP7 ENP2 PXR1 RRP3 IPI1 DBP8 FAF1 UTP25 HCA4 UTP18 RPS14B TOR1 MAK11 DHR2 RRP14 DBP7 UTP30 DRS1 RNP1 DIP2 UTP13 UTP21 ECM16 RRB1 RRP5 HAS1 NAF1 IPI3 NOG2 RPS15 NOP8 YTM1 RRP36 NOP4 RPS9A NIP7 RRP9 NOC4
30°C	sin3∆	Tec1	Decreased	Activator	Increased	Inhibitor	rRNA processing [GO:0006364]	<1e-14	50	195	RPS14A PWP2 NOP14 FAL1 BFR2 ESF1 NUG1 RPL30 NSA1 RPS2 UTP22 NOP7 ENP2 EFG1 PXR1 RRP3 IPI1 DBP8 UTP25 HCA4 UTP18 RPS14B DHR2 RRP14 DBP7 UTP30 DRS1 FYV7 DIP2 UTP13 UTP21 TSR2 ECM16 RRB1 RRP5 RNT1 HAS1 NAF1 IPI3 POP1 REX4 YTM1 RRP36 NOP4 RPS9A MOT1 NIP7 MRD1 RRP9 NOC4
30°C	sin3∆	Tec1	Decreased	Activator	Increased	Inhibitor	meiosis [GO:0007126]	2.965e-13	38	134	ALK2 MEC1 PCH2 ADY2 CSM1 CDC7 ZIP1 XRS2 PMD1 MSH4 HOP2 SAE2 MND1 ZIP2 BNS1 SPO11 SPO13 SAE3 SPO12 SPO16 REC104 CSM2 IME2 SWE1 TOR1 RED1 REC102 CTF3 PDS5 REC114 CIK1 TOF1 NDJ1 SGO1 SLK19 MEK1 MEI5 KAR3
30°C	sin3∆	Tec1	Decreased	Activator	Increased	Inhibitor	maturation of SSU-rRNA from tricistronic rRNA transcript (SSU-rRNA, 5.8S rRNA, LSU-rRNA) [GO:0000462]	1.362e-10	22	60	RPS14A PWP2 NOP14 FAL1 RPS13 UTP22 NOP7 EFG1 RPS27B RRP3 FAF1 UTP25 RPS14B DHR2 FYV7 DIP2 UTP13 TSR2 ECM16 RPS16A RRP36 RPS9A
30°C	sin3∆	Tec1	Decreased	Activator	Increased	Inhibitor	reciprocal meiotic recombination [GO:0007131]	3.553e-10	19	47	MEC1 MSH5 UME6 ZIP1 ECM11 MSH4 HOP2 MND1 ZIP2 SAE3 MSH1 REC104 BAS1 TOP3 RED1 REC102 REC114 NDJ1 MEI5
30°C	sin3∆	Tec1	Decreased	Activator	Increased	Inhibitor	cell cycle [GO:0007049]	6.963e-09	54	316	LTE1 MAK16 ALK2 MCM2 STU1 KIP1 BRN1 BUD3 KCC4 BUD31 CDC7 CYK3 PDS1 SCC2 YCG1 YHP1 DSE1 ALK1 ZIP2 DBF2 NOP7 CLB6 BNS1 PCL5 IRR1 MCM10 AIM20 MPS3 SWE1 CDC6 BFA1 TOR1 BUD4 CDC45 CLB4 MCM5 CTF3 HOF1 PDS5 BNI5 TOF1 EGT2 NUF2 SGO1 ELG1 SLK19 RAD53 KIP2 IPL1 ACM1 CLB2 CLB5 KAR3 DPB2
30°C	sin3∆	Tec1	Decreased	Activator	Increased	Inhibitor	ribosomal small subunit biogenesis [GO:0042274]	4.33e-07	11	24	NOP14 ENP2 UTP25 RRP14 LTV1 UTP30 SGD1 UTP21 KRE33 RRP36 NOC4
30°C	sin3∆	Tec1	Decreased	Activator	Increased	Inhibitor	mitotic sister chromatid cohesion [GO:0007064]	4.289e-06	10	24	POL30 DCC1 MRC1 IRR1 MPS3 TOP3 PDS5 TOF1 ELG1 KAR3
30°C	sin3∆	Tec1	Decreased	Activator	Decreased	Activator	metabolic process [GO:0008152]	1.655e-06	54	425	BDH2 YBR056W TKL2 ADH7 GPM2 YDL114W EHD3 ENA5 ENA1 URH1 APA2 YDR541C PHM8 AGX1 SEC53 SNZ3 GSY1 PMC1 AMS1 ARI1 POX1 NQM1 GND2 DOG1 PTC7 CRG1 SGA1 POT1 INO1 IMA5 BNA1 PGU1 SOR1 GFA1 MCD4 SRY1 ADE16 BNA5 MET17 YLR345W TDA5 CYB2 YMR090W ALD3 SCW10 LAP2 SPS19 SNZ2 DDI3 SPR1 ALD4 OYE3 GDB1 HPA2
30°C	sin3∆	Tec1	Decreased	Activator	Decreased	Activator	oxidation-reduction process [GO:0055114]	1.77e-05	37	272	BDH2 ARA1 ADH7 YDL114W DLD2 DIT2 YDR541C ARI1 POX1 CTT1 GND2 AIM17 HTD2 GRE3 DOT5 BNA1 BNA2 AAD10 SOR1 GPX1 FMP46 SDH2 JLP1 COX8 TDA5 CYB2 NDI1 ERO1 ALD3 IDP3 SPS19 FRE7 CYC2 GCY1 ALD4 OYE3 YPR127W
30°C	sin3∆	Eds1	Decreased	Activator	Increased	Inhibitor	lysine biosynthetic process [GO:0009085]	3.924e-13	6	8	LYS21 LYS20 LYS4 LYS12 LYS1 LYS9
30°C	sin3∆	Eds1	Decreased	Activator	Increased	Inhibitor	lysine biosynthetic process via aminoadipic acid [GO:0019878]	1.721e-10	5	8	LYS21 LYS20 LYS4 LYS1 LYS9
30°C	sin3∆	Eds1	Decreased	Activator	Increased	Inhibitor	cellular amino acid biosynthetic process [GO:0008652]	1.237e-09	9	98	LYS21 LYS20 LYS4 IRC7 LYS12 HIS5 LYS1 BAT2 LYS9
30°C	sin3∆	Eds1	Decreased	Activator	Increased	Inhibitor	metabolic process [GO:0008152]	9.289e-07	12	425	LYS21 LYS20 LYS4 SDT1 HIS5 ACO2 BAT2 MAE1 ACO1 LYS9 GDH1 FDH1
30°C	sin3∆	Hac1	Decreased	Activator	Increased	Inhibitor	cellular amino acid biosynthetic process [GO:0008652]	<1e-14	37	98	LYS2 ILV6 HIS4 CTR86 LYS21 LYS20 ARO3 ARO1 HOM2 LYS4 HOM3 HIS1 SER3 MET6 TRP5 STR3 ARG4 THR1 BAT1 LYS12 HIS5 MET28 LYS1 ARG2 ARG3 CPA2 STR2 BAT2 MET1 ARG7 LEU4 LYS9 ARG1 ORT1 CPA1 SAM4 ASN1
30°C	sin3∆	Hac1	Decreased	Activator	Increased	Inhibitor	metabolic process [GO:0008152]	2.829e-13	46	425	ZTA1 LYS2 ADH5 ILV6 HIS4 APA1 CHA1 LYS21 LYS20 YDR018C ARO3 ARO1 HOM2 LYS4 URA3 HOM3 ALD5 SER3 TRP5 SCW11 PYC1 SDT1 BIO2 ARD1 FUR1 BAT1 HIS5 ACO2 CPA2 BAT2 YJR149W MET1 ACO1 CAR2 YLR460C ERG13 PLB2 ARG7 SNZ1 IDH1 LEU4 NRK1 LYS9 DSE4 GDH1 FDH1
30°C	sin3∆	Hac1	Decreased	Activator	Increased	Inhibitor	arginine biosynthetic process [GO:0006526]	5.488e-11	8	10	ARG4 ARG2 ARG3 CPA2 ARG7 ARG1 ORT1 CPA1
30°C	sin3∆	Hac1	Decreased	Activator	Increased	Inhibitor	lysine biosynthetic process [GO:0009085]	3.126e-10	7	8	LYS2 LYS21 LYS20 LYS4 LYS12 LYS1 LYS9
30°C	sin3∆	Hac1	Decreased	Activator	Increased	Inhibitor	lysine biosynthetic process via aminoadipic acid [GO:0019878]	3.296e-08	6	8	LYS2 LYS21 LYS20 LYS4 LYS1 LYS9
30°C	sin3∆	Hac1	Decreased	Activator	Increased	Inhibitor	nitrogen utilization [GO:0019740]	9.615e-08	6	9	ADY2 ATO3 UGA1 MEP1 MEP2 MEP3
30°C	sin3∆	Hac1	Decreased	Activator	Increased	Inhibitor	ammonium transport [GO:0015696]	2.241e-07	5	6	ADY2 ATO3 MEP1 MEP2 MEP3
30°C	sin3∆	Hac1	Decreased	Activator	Increased	Inhibitor	meiosis [GO:0007126]	1.725e-06	17	134	ALK2 RDH54 ADY2 HED1 MEI4 MND1 ZIP2 SPO11 SPO13 SPO12 SPO16 IME2 RED1 REC102 REC114 NDJ1 MEK1
30°C	sin3∆	Hac1	Decreased	Activator	Increased	Inhibitor	oxidation-reduction process [GO:0055114]	2.994e-06	25	272	ZTA1 LYS2 ADH5 HIS4 ARO1 HOM2 ALD5 SER3 MET13 ADH4 YHB1 ERG11 LYS12 LYS1 YJR149W SRX1 ERG3 IDP2 FRE1 YLR460C FET3 IDH1 LYS9 GDH1 FDH1
30°C	sin3∆	Hac1	Decreased	Activator	Increased	Inhibitor	methionine biosynthetic process [GO:0009086]	5.259e-06	8	31	HOM2 MET6 MET13 STR3 MET28 STR2 MET1 SAM4
30°C	sin3∆	Hac1	Decreased	Activator	Increased	Inhibitor	threonine biosynthetic process [GO:0009088]	1.677e-05	4	6	CTR86 HOM2 HOM3 THR1
30°C	sin3∆	Hac1	Decreased	Activator	Increased	Inhibitor	reciprocal meiotic recombination [GO:0007131]	1.873e-05	9	47	RDH54 ECM11 MND1 ZIP2 MSH1 RED1 REC102 REC114 NDJ1
30°C	sin3∆	Hac1	Decreased	Activator	Decreased	Activator	posttranslational protein targeting to membrane, translocation [GO:0031204]	1.908e-08	7	9	SEC66 KAR2 LHS1 SEC72 SEC61 SEC63 SEC62
30°C	sin3∆	Hac1	Decreased	Activator	Decreased	Activator	ER-associated protein catabolic process [GO:0030433]	3.083e-08	14	48	DER1 URH1 DFM1 DOG2 KAR2 JEM1 LCL2 HRD3 SEC61 USA1 UBC7 ADD37 SCJ1 HRD1
30°C	sin3∆	Hac1	Decreased	Activator	Decreased	Activator	response to unfolded protein [GO:0006986]	4.564e-06	6	11	HAC1 ULI1 KAR2 LHS1 ORM2 SCJ1
30°C	sin3∆	Hac1	Decreased	Activator	Decreased	Activator	metabolic process [GO:0008152]	5.33e-06	42	425	BDH1 BDH2 GPM2 GPD1 YDL114W ENA5 URH1 SPF1 PHM8 AGX1 SEC53 GSY1 BNA6 PNC1 AMS1 ARI1 COQ6 DOG2 DOG1 PTC7 OYE2 CRG1 SGA1 POT1 TDH1 INO1 IMA5 BNA1 PGU1 GFA1 MCD4 SRY1 ADE16 PDC5 BNA5 MET17 CYB2 YMR090W ALD3 YMR315W YNL134C SPS19
30°C	sin3∆	Hac1	Decreased	Activator	Decreased	Activator	thiamine biosynthetic process [GO:0009228]	7.357e-06	7	17	THI13 THI5 SNO3 RPI1 THI12 THI20 THI21
30°C	sin3∆	Rof1	Decreased	Activator	Increased	Inhibitor	cytokinesis, completion of separation [GO:0007109]	2.851e-06	4	11	DSE1 SCW11 DSE2 CTS1
30°C	sin3∆	Rof1	Decreased	Activator	Increased	Inhibitor	ammonium transport [GO:0015696]	1.868e-05	3	6	ADY2 ATO3 MEP2
30°C	sin3∆	Mga1	Decreased	Activator	Increased	Inhibitor	steroid biosynthetic process [GO:0006694]	1.216e-06	6	25	ERG28 ERG11 ERG6 ERG8 ERG24 IDI1
30°C	sin3∆	Mga1	Decreased	Activator	Increased	Inhibitor	sterol biosynthetic process [GO:0016126]	3.11e-06	6	29	ERG28 ERG11 ERG6 ERG8 ERG24 IDI1
30°C	sin3∆	Mga1	Decreased	Activator	Increased	Inhibitor	ergosterol biosynthetic process [GO:0006696]	1.683e-05	5	23	ERG28 ERG11 ERG6 ERG8 ERG24
30°C	sin3∆	Mga1	Decreased	Activator	Decreased	Activator	response to stress [GO:0006950]	1.63e-05	11	152	HSP26 HSP31 HSP12 CTT1 WSC4 GRE3 MSN4 HSP104 ICT1 DDR48 ZEO1
30°C	sin3∆	Msn4	Decreased	Activator	Increased	Inhibitor	ribosome biogenesis [GO:0042254]	<1e-14	54	170	ENP1 KRR1 PWP2 NOP1 NOP14 NOP6 UTP4 ESF1 UTP6 LCP5 DBP3 NSA1 ROK1 UTP22 NOP7 ENP2 PXR1 SSF1 IPI1 IMP3 RIX1 FAF1 UTP25 HCA4 UTP18 TOR1 MRT4 DHR2 RRP14 DRS1 RIX7 RLP24 DIP2 UTP13 RPP0 UTP21 ERB1 ECM16 RRB1 RRP5 NOP2 IPI3 NOG2 RCL1 NOP12 BRX1 UTP23 RRP36 RRS1 NOP4 RPS9A NIP7 RRP9 NOC4
30°C	sin3∆	Msn4	Decreased	Activator	Increased	Inhibitor	rRNA processing [GO:0006364]	<1e-14	52	195	ENP1 KRR1 PWP2 NOP1 NOP14 NOP6 BFR2 UTP4 ESF1 UTP6 LCP5 DBP3 NSA1 ROK1 UTP22 NOP7 ENP2 NSR1 EFG1 PXR1 IPI1 IMP3 RIX1 UTP25 HCA4 UTP18 MRT4 DHR2 RRP14 DRS1 FYV7 DIP2 PWP1 UTP13 UTP21 TSR2 ERB1 ECM16 RRB1 RRP5 NOP2 IPI3 NOP12 REX4 UTP23 RRP36 NOP4 RPS9A NIP7 MRD1 RRP9 NOC4
30°C	sin3∆	Msn4	Decreased	Activator	Increased	Inhibitor	maturation of SSU-rRNA from tricistronic rRNA transcript (SSU-rRNA, 5.8S rRNA, LSU-rRNA) [GO:0000462]	3.346e-13	20	60	RPS11B PWP2 RPS16B NOP14 RPS11A UTP4 UTP6 UTP22 NOP7 EFG1 FAF1 UTP25 DHR2 FYV7 DIP2 UTP13 TSR2 ECM16 RRP36 RPS9A
30°C	sin3∆	Msn4	Decreased	Activator	Increased	Inhibitor	endonucleolytic cleavage in ITS1 to separate SSU-rRNA from 5.8S rRNA and LSU-rRNA from tricistronic rRNA transcript (SSU-rRNA, 5.8S rRNA, LSU-rRNA) [GO:0000447]	4.779e-11	15	40	ENP1 KRR1 PWP2 NOP14 UTP6 UTP18 DIP2 UTP13 RPS18B RRP5 RCL1 UTP23 RRS1 MRD1 NOC4
30°C	sin3∆	Msn4	Decreased	Activator	Increased	Inhibitor	ribosomal large subunit assembly [GO:0000027]	2.848e-10	14	38	RSA4 DBP3 SSF1 IPI1 RIX1 MRT4 RPF2 DRS1 RPP0 IPI3 BRX1 REX4 RPL25 NIP7
30°C	sin3∆	Msn4	Decreased	Activator	Increased	Inhibitor	ribosomal small subunit biogenesis [GO:0042274]	1.512e-09	11	24	KRR1 NOP14 NOP6 ENP2 UTP25 RRP14 LTV1 UTP21 KRE33 RRP36 NOC4
30°C	sin3∆	Msn4	Decreased	Activator	Increased	Inhibitor	endonucleolytic cleavage in 5'-ETS of tricistronic rRNA transcript (SSU-rRNA, 5.8S rRNA, LSU-rRNA) [GO:0000480]	7.011e-09	11	27	PWP2 NOP14 UTP6 UTP18 DIP2 UTP13 RRP5 RCL1 UTP23 MRD1 NOC4
30°C	sin3∆	Msn4	Decreased	Activator	Increased	Inhibitor	endonucleolytic cleavage to generate mature 5'-end of SSU-rRNA from (SSU-rRNA, 5.8S rRNA, LSU-rRNA) [GO:0000472]	1.719e-08	11	29	PWP2 NOP14 UTP6 UTP18 DIP2 UTP13 RRP5 RCL1 UTP23 MRD1 NOC4
30°C	sin3∆	Msn4	Decreased	Activator	Increased	Inhibitor	ribosomal large subunit biogenesis [GO:0042273]	3.095e-07	11	37	MAK16 PUF6 NSA1 NOP7 MRT4 RRP14 RIX7 RLP24 ERB1 RRS1 NIP7
30°C	sin3∆	Msn4	Decreased	Activator	Decreased	Activator	oxidation-reduction process [GO:0055114]	3.086e-09	39	272	BDH1 BDH2 ARA1 GPD1 YDL114W YDL124W ARI1 POX1 CTT1 COQ6 GND2 AIM17 GRE3 OYE2 DOT5 RNR3 BNA2 YJR096W RSM26 SOR1 GPX1 MCR1 FMP46 SDH2 JLP1 TSA1 CYB2 NDI1 ERO1 FMS1 ALD3 YMR315W IDP3 YNL134C SPS19 MDH2 GCY1 ALD4 OYE3
30°C	sin3∆	Msn4	Decreased	Activator	Decreased	Activator	thiamine biosynthetic process [GO:0009228]	3.766e-08	9	17	THI13 THI5 SNZ3 RPI1 THI11 THI12 SNZ2 THI20 THI21
30°C	sin3∆	Msn4	Decreased	Activator	Decreased	Activator	response to stress [GO:0006950]	1.712e-07	25	152	HSP26 TPS1 BSD2 GPD1 FMP45 NTH1 TPS2 HSP31 SSA4 HSP12 CTT1 WSC4 GRE3 FMC1 XBP1 KAR2 DAN4 MSN4 HSP104 UBI4 DAK1 TSL1 DDR48 ZEO1 GRE1
30°C	sin3∆	Msn4	Decreased	Activator	Decreased	Activator	metabolic process [GO:0008152]	3.064e-07	47	425	BDH1 BDH2 YBR056W TKL2 GPM2 GPD1 YDL114W NTH1 TPS2 PHM8 AGX1 SNZ3 GSY1 PNC1 AMS1 ARI1 POX1 NQM1 COQ6 GND2 DOG2 OYE2 CRG1 RNR3 SGA1 POT1 INO1 IMA5 SOR1 GFA1 MCD4 GSY2 YLR345W CYB2 YMR090W ALD3 YMR315W YNL134C SPS19 SNZ2 DDI3 MDH2 SPR1 ALD4 OYE3 GDB1 HPA2
30°C	sin3∆	Msn4	Decreased	Activator	Decreased	Activator	mitochondrial translation [GO:0032543]	1.741e-06	17	88	MRPL16 MRPS9 RSM10 MRPL35 MRP20 MRF1 MRPL8 RSM26 MRPL15 MRPL3 MRPS8 MSK1 SWS2 NAM9 MRPS12 IFM1 MRP2
30°C	sin3∆	Msn4	Decreased	Activator	Decreased	Activator	carbohydrate metabolic process [GO:0005975]	1.921e-05	16	94	YBR056W GLK1 GPD1 EMI2 GLC3 AMS1 NQM1 SOL4 SGA1 IMA5 GFA1 PGM2 MDH2 SPR1 GPH1 GDB1
30°C	sin3∆	Msn4	Decreased	Activator	Decreased	Activator	ER-associated protein catabolic process [GO:0030433]	2.262e-05	11	48	DER1 DOG2 KAR2 JEM1 LCL2 HRD3 CSR1 USA1 ADD37 SCJ1 HRD1
30°C	sin3∆	Adr1	Decreased	Activator	Increased	Inhibitor	ribosome biogenesis [GO:0042254]	2.653e-08	16	170	REI1 SPB1 KRR1 PWP2 UTP6 DBP3 ENP2 SSF1 DBP7 RLP24 RPS31 UTP13 RRP5 NAF1 IPI3 NOP4
30°C	sin3∆	Adr1	Decreased	Activator	Increased	Inhibitor	transmembrane transport [GO:0055085]	8.157e-07	19	303	FUR4 QDR3 CTP1 AGP1 ADY2 ATO3 VMR1 MUP3 HOT13 OAC1 PXA2 HXT2 FET4 ALP1 MCH4 ENB1 SSU1 PXA1 DIP5
30°C	sin3∆	Adr1	Decreased	Activator	Decreased	Activator	fatty acid beta-oxidation [GO:0006635]	3.405e-06	4	10	POX1 POT1 TES1 IDP3
30°C	sin3∆	Nrg2	Decreased	Activator	Decreased	Activator	ATP synthesis coupled proton transport [GO:0015986]	3.697e-08	5	17	ATP5 ATP17 ATP2 ATP4 ATP15
30°C	sin3∆	Nrg2	Decreased	Activator	Decreased	Activator	ATP biosynthetic process [GO:0006754]	9.54e-07	5	31	ENA1 ATP5 ATP17 ATP2 ATP15
30°C	sin3∆	Nrg2	Decreased	Activator	Decreased	Activator	proton transport [GO:0015992]	4.025e-06	5	41	ATP5 ATP17 ATP2 ATP4 ATP15
30°C	sin3∆	Arr1	Decreased	Activator	Increased	Inhibitor	cellular amino acid biosynthetic process [GO:0008652]	<1e-14	24	98	HIS7 ARO4 THR4 HOM2 SER3 TRP2 IRC7 SER2 ARG4 BAT1 HIS5 LYS1 ARG3 ILV3 BAT2 TRP3 ADI1 ARG7 ILV2 LYS9 ARG1 SER1 SAM4 ASN1
30°C	sin3∆	Arr1	Decreased	Activator	Increased	Inhibitor	metabolic process [GO:0008152]	2.27e-07	34	425	ACS1 HIS7 ARO4 APA1 THR4 GDH2 HOM2 ALD5 SER3 YGL039W SDT1 SER2 IMA1 ARD1 FUR1 BAT1 HIS5 ACO2 ILV3 BAT2 OAR1 TRP3 MTD1 CAR2 ERG13 PLB2 ARG7 IDH1 NRK1 LYS9 SER1 YPK9 FDH1 POS5
30°C	sin3∆	Arr1	Decreased	Activator	Increased	Inhibitor	siderophore transport [GO:0015891]	1.426e-06	5	8	SIT1 ARN1 ARN2 FIT2 FIT3
30°C	sin3∆	Arr1	Decreased	Activator	Decreased	Activator	metabolic process [GO:0008152]	1.716e-06	28	425	BDH1 BDH2 NTH2 TKL2 ADH7 PHM8 AGX1 SNZ3 GSY1 BNA6 AMS1 ARI1 POX1 NQM1 GND2 OYE2 RNR3 POT1 BNA1 GSY2 SCW10 LAP2 YNL134C SNZ2 DDI3 SPR1 HAT1 GDB1
30°C	sin3∆	Arr1	Decreased	Activator	Decreased	Activator	thiamine biosynthetic process [GO:0009228]	2.19e-06	6	17	THI13 THI5 SNZ3 THI11 THI12 SNZ2
30°C	sin3∆	Arr1	Decreased	Activator	Decreased	Activator	glycogen biosynthetic process [GO:0005978]	6.303e-06	5	12	GLC3 GSY1 GSY2 PGM2 GDB1
30°C	sin3∆	Arr1	Decreased	Activator	Decreased	Activator	hexose transport [GO:0008645]	1.53e-05	5	14	HXT7 HXT6 HXT4 HXT5 HXT9
30°C	sin3∆	Xbp1	Decreased	Activator	Increased	Inhibitor	cellular amino acid biosynthetic process [GO:0008652]	3.825e-08	17	98	HIS4 ARO1 HOM2 MET6 THR1 LYS12 LYS1 BAT2 ADI1 ARG7 LEU4 LYS9 ARG1 CPA1 SAM4 ARO7 ASN1
30°C	sin3∆	Xbp1	Decreased	Activator	Increased	Inhibitor	cell cycle [GO:0007049]	4.274e-08	32	316	ALK2 SHE1 KIP1 BUD3 KCC4 CYK3 YHP1 DSE1 ALK1 SRM1 DBF2 PCL5 IRR1 AIM20 SAP185 SWE1 BFA1 BUD4 CDC45 CLB4 MCM5 CTF3 TEM1 HOF1 PDS5 SUN4 EGT2 KIP2 IPL1 CLB2 KAR3 DPB2
30°C	sin3∆	Xbp1	Decreased	Activator	Increased	Inhibitor	cytokinesis, completion of separation [GO:0007109]	7.033e-07	6	11	DSE1 SCW11 DSE2 CTS1 DSE4 ASE1
30°C	sin3∆	Xbp1	Decreased	Activator	Increased	Inhibitor	cell division [GO:0051301]	2.645e-06	21	190	SHE1 KIP1 KCC4 CYK3 DSE1 SRM1 PCL5 IRR1 SWE1 BFA1 BUD4 CLB4 CTF3 TEM1 HOF1 PDS5 SUN4 EGT2 KIP2 CLB2 KAR3
30°C	sin3∆	Xbp1	Decreased	Activator	Increased	Inhibitor	mitosis [GO:0007067]	3.092e-06	17	132	ALK2 SHE1 KIP1 ALK1 SRM1 IRR1 SWE1 BFA1 CLB4 CTF3 TEM1 HOF1 PDS5 EGT2 KIP2 CLB2 KAR3
30°C	sin3∆	Xbp1	Decreased	Activator	Increased	Inhibitor	nitrogen utilization [GO:0019740]	5.76e-06	5	9	ADY2 UGA3 ATO3 MEP1 MEP2
30°C	sin3∆	Xbp1	Decreased	Activator	Increased	Inhibitor	transmembrane transport [GO:0055085]	6.453e-06	27	303	QDR3 AAC3 CTP1 VMA9 AGP1 ADY2 GGC1 BAP3 ATO3 CAN1 SIT1 FCY2 FTR1 MEP1 MUP3 QDR2 PHO90 GAP1 HXT2 ZRC1 FET4 AQR1 MEP2 ODC1 PXA1 DIP5 OPT2
30°C	sin3∆	Xbp1	Decreased	Activator	Increased	Inhibitor	ammonium transport [GO:0015696]	2.108e-05	4	6	ADY2 ATO3 MEP1 MEP2
30°C	sin3∆	Xbp1	Decreased	Activator	Decreased	Activator	thiamine biosynthetic process [GO:0009228]	7.963e-07	7	17	THI13 THI5 SNZ3 SNO3 THI11 THI12 SNZ2
30°C	sin3∆	Xbp1	Decreased	Activator	Decreased	Activator	oxidation-reduction process [GO:0055114]	2.083e-06	26	272	DLD2 DIT2 ARI1 POX1 CTT1 AIM17 HTD2 GRE3 OYE2 DOT5 RNR3 TDH1 BNA2 YJR096W FMP46 JLP1 COX8 CYB2 ERO1 FMS1 YNL134C CYC2 GCY1 DFR1 ALD4 OYE3
30°C	sin3∆	Xbp1	Decreased	Activator	Decreased	Activator	ATP biosynthetic process [GO:0006754]	7.324e-06	8	31	ATP1 ATP3 ENA5 ENA2 ENA1 ATP5 ATP17 ATP2
30°C	sin3∆	Xbp1	Decreased	Activator	Decreased	Activator	protein O-linked glycosylation [GO:0006493]	9.75e-06	6	16	PMT2 PMT5 PMT1 MNN4 PMT3 DPM1
30°C	sin3∆	Xbp1	Decreased	Activator	Decreased	Activator	ATP synthesis coupled proton transport [GO:0015986]	1.463e-05	6	17	ATP1 ATP3 ATP5 ATP17 ATP2 ATP4
30°C	sin3∆	Xbp1	Decreased	Activator	Decreased	Activator	response to unfolded protein [GO:0006986]	1.871e-05	5	11	HAC1 ULI1 KAR2 LHS1 SCJ1
30°C	sin3∆	Xbp1	Decreased	Activator	Decreased	Activator	metabolic process [GO:0008152]	2.229e-05	32	425	GPM2 ENA5 ENA2 ENA1 AGX1 SNZ3 BNA6 ARI1 POX1 SCW4 DOG2 DOG1 OYE2 CRG1 RNR3 SGA1 POT1 TDH1 INO1 GFA1 MCD4 SRY1 PDC5 BNA5 GSY2 CYB2 SCW10 YNL134C SNZ2 ALD4 OYE3 GDB1
30°C	sin3∆	Rpi1	Decreased	Activator	Decreased	Activator	glycogen biosynthetic process [GO:0005978]	3.178e-07	4	12	GLC3 GSY1 GSY2 PGM2
30°C	sin3∆	Rpi1	Decreased	Activator	Decreased	Activator	trehalose biosynthetic process [GO:0005992]	4.707e-06	3	7	TPS2 TSL1 PGM2
30°C	sin3∆	Fkh2	Increased	Inhibitor	Increased	Activator	ribosome biogenesis [GO:0042254]	<1e-14	28	170	MAK5 RRP7 KRR1 DBP3 NSA1 ROK1 ENP2 FAF1 MRT4 MAK11 DRS1 DIP2 UTP13 ERB1 UTP15 RRB1 HAS1 NOP2 NAF1 IPI3 BRX1 UTP23 YTM1 RRS1 NOP4 RPS6A DIM1 RRP9
30°C	sin3∆	Fkh2	Increased	Inhibitor	Increased	Activator	rRNA processing [GO:0006364]	<1e-14	29	195	MAK5 RRP7 KRR1 DBP3 NSA1 ROK1 ENP2 NSR1 MRT4 DRS1 DIP2 PWP1 UTP13 TSR2 ERB1 UTP15 RRB1 RNT1 HAS1 NOP2 NAF1 IPI3 REX4 UTP23 YTM1 NOP4 RPS6A DIM1 RRP9
30°C	sin3∆	Fkh2	Increased	Inhibitor	Increased	Activator	ribosomal large subunit biogenesis [GO:0042273]	6.065e-08	8	37	MAK16 MAK5 NSA1 MRT4 MAK11 ERB1 YTM1 RRS1
30°C	sin3∆	Fkh2	Increased	Inhibitor	Increased	Activator	ribosomal large subunit assembly [GO:0000027]	7.587e-08	8	38	DBP3 MRT4 MAK11 RPF2 DRS1 IPI3 BRX1 REX4
30°C	sin3∆	Fkh2	Increased	Inhibitor	Increased	Activator	cytokinesis, completion of separation [GO:0007109]	3.257e-07	5	11	DSE1 SCW11 MYO1 DSE2 CTS1
30°C	sin3∆	Fkh2	Increased	Inhibitor	Increased	Activator	maturation of SSU-rRNA from tricistronic rRNA transcript (SSU-rRNA, 5.8S rRNA, LSU-rRNA) [GO:0000462]	3.008e-06	8	60	FAF1 DIP2 UTP13 TSR2 RPS1A RPS1B UTP15 RPS6A
30°C	sin3∆	Fkh2	Increased	Inhibitor	Increased	Activator	cytokinesis [GO:0000910]	2.049e-05	6	38	CHS2 BUD3 CYK3 MYO1 EGT2 IQG1
30°C	sin3∆	Met28	Increased	Inhibitor	Increased	Activator	maturation of SSU-rRNA from tricistronic rRNA transcript (SSU-rRNA, 5.8S rRNA, LSU-rRNA) [GO:0000462]	<1e-14	35	60	RPS8A RPS11B RPS6B RPS9B RPS14A PWP2 RPS16B NOP14 RPS11A RPS13 UTP4 UTP6 SNU13 RPS24A RPS8B SLX9 UTP22 NOP7 RPS20 RPS27B RRP3 FAF1 RPS24B UTP25 DHR2 FYV7 UTP13 TSR2 RPS1A RPS1B UTP15 ECM16 RPS16A RRP36 RPS23B
30°C	sin3∆	Met28	Increased	Inhibitor	Increased	Activator	cellular amino acid biosynthetic process [GO:0008652]	<1e-14	52	98	MIS1 LYS2 ARO4 ILV6 LEU2 HIS4 THR4 LYS21 LYS20 ARO3 ARO1 HOM2 LYS4 TRP4 UTR4 HOM3 HIS1 SER3 ILV1 TRP2 MET6 IRC7 TRP5 STR3 SER2 ARG4 THR1 BAT1 HIS6 LYS12 HIS5 MET28 LYS1 ARG2 ARG3 ILV3 CPA2 TRP3 MET1 YML082W YML096W ADI1 ILV2 LYS9 ARG1 LEU9 ORT1 SER1 HIS3 CPA1 ARO7 ASN1
30°C	sin3∆	Met28	Increased	Inhibitor	Increased	Activator	ribosome biogenesis [GO:0042254]	<1e-14	75	170	MAK5 RPS6B RPS9B REI1 RRP7 SPB1 KRR1 RPS14A PWP2 NOP1 NOP14 NOP6 UTP4 ESF1 UTP6 SNU13 NUG1 CGR1 DBP3 NSA1 RPS2 ROK1 SLX9 UTP22 NOP7 ENP2 RPS0A PXR1 BCD1 RRP3 SSF1 IPI1 IMP3 DBP8 RIX1 FAF1 UTP25 RPL40A HCA4 MAK11 DHR2 RRP14 RPL40B DRS1 RIX7 RPL8B RNP1 RLP24 RPS31 UTP13 UTP21 ERB1 UTP15 ECM16 HAS1 NOP2 NAF1 IPI3 NOG2 RCL1 RPS15 NOP12 BRX1 NOP8 UTP23 RPS7A YTM1 RRP36 RRS1 NOP4 NIP7 DIM1 RRP9 RRP15 N…
30°C	sin3∆	Met28	Increased	Inhibitor	Increased	Activator	rRNA processing [GO:0006364]	<1e-14	69	195	MAK5 RPS6B RPS9B RRP7 SPB1 KRR1 RPS14A RRP43 PWP2 NOP1 NOP14 NOP6 BFR2 UTP4 ESF1 UTP6 SNU13 NUG1 CGR1 RPL30 DBP3 NSA1 RPS2 ROK1 SLX9 UTP22 NOP7 ENP2 NSR1 RPS0A PXR1 RRP3 IPI1 IMP3 DBP8 RIX1 UTP25 HCA4 RPS21B DHR2 RRP14 RPS21A DRS1 FYV7 PWP1 UTP13 UTP21 TSR2 ERB1 UTP15 ECM16 RNT1 HAS1 NOP2 NAF1 IPI3 POP1 NOP12 UTP23 RPS7A YTM1 RRP36 NOP4 MOT1 NIP7 DIM1 RRP9 RRP15 NOC4
30°C	sin3∆	Met28	Increased	Inhibitor	Increased	Activator	translation [GO:0006412]	<1e-14	95	318	RBG1 RPL19B RPS8A RPL23A RPL32 RPL4A RPS11B RPS6B RPS9B SRO9 RPS14A RPL31A RPS16B RPL4B RPS11A KRS1 RPS13 YDR341C RPP2B RPL12B RPS17B RPS18A HYP2 RPL12A RPL34A RPS24A RPS8B RPL23B RPL22B YMR31 RPL30 RPL24A RPL7A RPL28 RPS2 RPL1B RPS25A RPL26B TYS1 RPS0A RPL14B RPS20 RPL27A YHR020W RPS27B RPS24B RPL16A RPL40A MEF2 RPS21B RPL17B RPS22A ANB1 RPS4A RPL17A RPS21A RPL40B RPL8B RLP24 RPL15A RPL22A RPL10…
30°C	sin3∆	Met28	Increased	Inhibitor	Increased	Activator	ribosomal large subunit assembly [GO:0000027]	1.886e-11	21	38	RSA4 RPL12B RPL12A DBP3 SSF1 IPI1 RIX1 YVH1 MAK11 RPF2 DRS1 RPL10 RPL6B RPL6A IPI3 BRX1 RPL25 RPL3 RPL5 NIP7 RPL11A
30°C	sin3∆	Met28	Increased	Inhibitor	Increased	Activator	metabolic process [GO:0008152]	2.73e-08	83	425	ACS1 AST1 BNA4 UGA2 ZTA1 MIS1 LYS2 PYC2 ARO4 DUG2 ILV6 NFS1 HIS4 APA1 BUD23 THR4 LYS21 LYS20 GDH2 ARO3 ARO1 HOM2 LYS4 TRP4 URA3 UTR4 HOM3 ALD5 SER3 ILV1 TRP5 SCW11 YGL039W PYC1 SDT1 SER2 BIO2 FUR1 BAT1 IMD2 FAA3 HIS6 HIS5 TRL1 CPS1 ACO2 ILV3 CPA2 MAE1 YKL033W-A OAR1 TRP3 MET1 MTD1 CTS1 ACO1 DUS3 CAR2 YLR460C ERG6 TRM9 ERG13 YML131W PLB2 SNZ1 HFA1 ERG12 FAA4 ADH6 IDH1 NRK1 DUG3 URK1 SMM1 LYS9 DSE4…
30°C	sin3∆	Met28	Increased	Inhibitor	Increased	Activator	ribosomal small subunit assembly [GO:0000028]	1.375e-07	10	14	RPS11B RRP7 RPS14A RPS11A RPS17B NSR1 RPS0A RPS27B RPS31 RPS17A
30°C	sin3∆	Met28	Increased	Inhibitor	Increased	Activator	lysine biosynthetic process [GO:0009085]	1.221e-06	7	8	LYS2 LYS21 LYS20 LYS4 LYS12 LYS1 LYS9
30°C	sin3∆	Met28	Increased	Inhibitor	Increased	Activator	endonucleolytic cleavage in ITS1 to separate SSU-rRNA from 5.8S rRNA and LSU-rRNA from tricistronic rRNA transcript (SSU-rRNA, 5.8S rRNA, LSU-rRNA) [GO:0000447]	1.53e-06	16	40	KRR1 BUD23 PWP2 NOP14 UTP6 RPS18A RPS0A DBP8 RPS21B RPS21A UTP13 RPS18B RCL1 UTP23 RRS1 NOC4
30°C	sin3∆	Met28	Increased	Inhibitor	Increased	Activator	ribosomal small subunit biogenesis [GO:0042274]	1.844e-06	12	24	KRR1 NOP14 NOP6 ENP2 UTP25 RRP14 LTV1 SGD1 UTP21 KRE33 RRP36 NOC4
30°C	sin3∆	Met28	Increased	Inhibitor	Increased	Activator	steroid biosynthetic process [GO:0006694]	3.2e-06	12	25	ERG28 ERG4 ERG11 ERG3 ERG6 HMG1 ERG13 ERG2 ERG12 ERG8 ERG24 IDI1
30°C	sin3∆	Met28	Increased	Inhibitor	Increased	Activator	aromatic amino acid family biosynthetic process [GO:0009073]	5.993e-06	8	12	ARO4 ARO3 ARO1 TRP4 TRP2 TRP5 TRP3 ARO7
30°C	sin3∆	Met28	Increased	Inhibitor	Increased	Activator	ergosterol biosynthetic process [GO:0006696]	8.719e-06	11	23	ERG28 ERG4 ERG11 ERG3 ERG6 HMG1 ERG13 ERG2 ERG12 ERG8 ERG24
30°C	sin3∆	Met28	Increased	Inhibitor	Increased	Activator	ribosomal large subunit biogenesis [GO:0042273]	1.49e-05	14	37	MAK5 REI1 PUF6 NSA1 NOP7 MAK11 RRP14 RIX7 RLP24 ERB1 NOP8 YTM1 RRS1 NIP7
30°C	sin3∆	Met28	Increased	Inhibitor	Increased	Activator	arginine biosynthetic process [GO:0006526]	1.504e-05	7	10	ARG4 ARG2 ARG3 CPA2 ARG1 ORT1 CPA1
30°C	sin3∆	Met28	Increased	Inhibitor	Increased	Activator	sterol biosynthetic process [GO:0016126]	2.119e-05	12	29	ERG28 ERG4 ERG11 ERG3 ERG6 HMG1 ERG13 ERG2 ERG12 ERG8 ERG24 IDI1
30°C	sin3∆	Met28	Increased	Inhibitor	Decreased	Inhibitor	mitochondrial translation [GO:0032543]	9.005e-08	24	88	MRPL16 MRP10 RSM10 MRPL35 MRP20 MRF1 RSM27 RRF1 RSM25 MRPL8 RSM7 MRPL38 MRPL3 MRPS8 MRPL44 MSK1 SWS2 MRPL50 MRPS12 RSM19 IFM1 MRPL23 RTC6 MRP2
30°C	sin3∆	Met28	Increased	Inhibitor	Decreased	Inhibitor	ATP biosynthetic process [GO:0006754]	3.602e-07	13	31	ATP1 ATP3 ENA5 ENA2 ENA1 ATP5 ATP17 SPF1 PMC1 NEO1 ATP2 ATP7 ATP15
30°C	sin3∆	Met28	Increased	Inhibitor	Decreased	Inhibitor	posttranslational protein targeting to membrane, translocation [GO:0031204]	7.722e-07	7	9	SEC66 KAR2 LHS1 SEC72 SEC61 SEC63 SEC62
30°C	sin3∆	Met28	Increased	Inhibitor	Decreased	Inhibitor	metabolic process [GO:0008152]	2.005e-06	63	425	NTH2 YBR056W GPM2 GPD1 YDL114W EHD3 ENA5 ENA2 ENA1 IPT1 TPS2 URH1 APA2 YDR541C SPF1 PHM8 AGX1 SEC53 SNZ3 GSY1 PMC1 PNC1 AMS1 ARI1 NQM1 COQ6 GND2 SCW4 DOG2 DOG1 PTC7 OYE2 CRG1 NEO1 SGA1 KGD1 POT1 TDH1 IMA5 BNA1 SOR1 GFA1 MCD4 SRY1 ADE16 PDC5 BNA5 GSY2 MET17 TDA5 CYB2 YMR090W ALD3 SCW10 YMR315W YNL134C SPS19 SNZ2 GPD2 SPR1 ALD4 HAT1 GDB1
30°C	sin3∆	Met28	Increased	Inhibitor	Decreased	Inhibitor	thiamine biosynthetic process [GO:0009228]	2.184e-06	9	17	THI5 SNZ3 SNO3 RPI1 THI11 THI12 SNZ2 THI20 THI21
30°C	sin3∆	Met28	Increased	Inhibitor	Decreased	Inhibitor	carbohydrate metabolic process [GO:0005975]	1.818e-05	21	94	YBR056W GLK1 GPD1 EMI2 GLC3 PMI40 AMS1 NQM1 SOL4 SCW4 PKP1 PCL7 SGA1 IMA5 GFA1 PGM2 SCW10 GPD2 SPR1 GPH1 GDB1
30°C	sin3∆	Fkh1	Increased	Inhibitor	Increased	Activator	maturation of SSU-rRNA from tricistronic rRNA transcript (SSU-rRNA, 5.8S rRNA, LSU-rRNA) [GO:0000462]	<1e-14	23	60	RPS8A RPS11B RPS6B RPS9B RPS14A RPS16B RPS11A RPS13 UTP4 UTP6 SNU13 RPS24A RPS8B RPS20 RPS27B RPS24B RPS14B RPS1A RPS1B RPS16A RPS9A RPS6A RPS23B
30°C	sin3∆	Fkh1	Increased	Inhibitor	Increased	Activator	translation [GO:0006412]	<1e-14	99	318	RPL19B RPS8A RPL23A RPL32 RPL4A RPS11B TEF2 RPS6B RPS9B RPS14A RPL31A RPS16B RPP1B RPL35A RPL4B RPS11A RPS13 RPP2B RPL12B RPS17B RPS18A RPL12A RPS24A RPS8B RPL23B RPL30 RPL24A RPL7A RPL28 RPS2 RPL1B RPL9A RPS25A RPL26B RPS0A RPL14B RPS20 RPL27A RPS27B RPS4B RPL2B RPL34B RPS24B RPL16A RPL40A RPS21B RPL17B RPS22A RPS14B RPS5 RPS4A RPL14A RPL17A RPS21A RPL40B RPL8B RLP24 RPL15A RPL22A RPL10 RPS31 RP…
30°C	sin3∆	Fkh1	Increased	Inhibitor	Increased	Activator	ribosomal small subunit assembly [GO:0000028]	1.763e-12	10	14	RPS11B RPS14A RPS11A RPS17B NSR1 RPS0A RPS27B RPS14B RPS31 RPS17A
30°C	sin3∆	Fkh1	Increased	Inhibitor	Increased	Activator	ribosome biogenesis [GO:0042254]	1.676e-11	27	170	RPS6B RPS9B RPS14A UTP4 UTP6 SNU13 CGR1 DBP3 RPS2 RPS0A RPL40A RPS14B MRT4 RPL40B RPL8B RLP24 RPS31 RPP0 RRB1 HAS1 NOG2 RPS15 BRX1 RPS7A RPS9A RPS6A NIP7
30°C	sin3∆	Fkh1	Increased	Inhibitor	Increased	Activator	ribosomal large subunit assembly [GO:0000027]	1.778e-10	13	38	RPL12B RPL12A DBP3 MRT4 RPL10 RPP0 RPL6B RPL6A BRX1 RPL25 RPL5 NIP7 RPL11A
30°C	sin3∆	Fkh1	Increased	Inhibitor	Increased	Activator	rRNA export from nucleus [GO:0006407]	5.245e-10	11	27	RPS18A RPS2 RPS0A RPS5 RPS28B RPS18B RPS3 RPS19B RPS15 RPS19A RPS10A
30°C	sin3∆	Fkh1	Increased	Inhibitor	Increased	Activator	cellular amino acid biosynthetic process [GO:0008652]	2.953e-08	17	98	LEU2 HIS4 LYS20 HIS1 SER3 MET6 STR3 ARG4 HIS5 MET28 LYS1 ARG3 BAT2 MET1 ARG7 ARG1 SAM4
30°C	sin3∆	Fkh1	Increased	Inhibitor	Increased	Activator	rRNA processing [GO:0006364]	7.892e-07	22	195	RPS6B RPS9B RPS14A UTP4 UTP6 SNU13 CGR1 RPL30 DBP3 RPS2 NSR1 RPS0A RPS21B RPS14B MRT4 RPS21A RRB1 HAS1 RPS7A RPS9A RPS6A NIP7
30°C	sin3∆	Fkh1	Increased	Inhibitor	Increased	Activator	cytokinesis, completion of separation [GO:0007109]	1.831e-05	5	11	DSE1 SCW11 MYO1 DSE2 CTS1
30°C	sin3∆	Fkh1	Increased	Inhibitor	Decreased	Inhibitor	oxidation-reduction process [GO:0055114]	8.268e-09	19	272	ARA1 GPD1 YDL124W CTT1 COQ6 AIM17 GRE3 TDH1 BNA1 MCR1 CYB2 NDI1 YMR315W YNL134C GPD2 MDH2 CYC2 GCY1 DFR1
30°C	sin3∆	Fkh1	Increased	Inhibitor	Decreased	Inhibitor	response to stress [GO:0006950]	3.033e-08	14	152	HSP26 TPS1 GPD1 TPS2 HSP31 HSP12 CTT1 WSC4 GRE3 HSP104 UBI4 TSL1 DDR48 ZEO1
30°C	sin3∆	Fkh1	Increased	Inhibitor	Decreased	Inhibitor	glycogen biosynthetic process [GO:0005978]	4.275e-07	5	12	GLC3 GSY1 GSY2 PGM2 GDB1
30°C	sin3∆	Fkh1	Increased	Inhibitor	Decreased	Inhibitor	carbohydrate metabolic process [GO:0005975]	8.671e-07	10	94	GLK1 GPD1 EMI2 GLC3 AMS1 PGM2 GPD2 MDH2 GPH1 GDB1
30°C	sin3∆	Fkh1	Increased	Inhibitor	Decreased	Inhibitor	trehalose biosynthetic process [GO:0005992]	1.421e-06	4	7	TPS1 TPS2 TSL1 PGM2
30°C	sin3∆	Fkh1	Increased	Inhibitor	Decreased	Inhibitor	metabolic process [GO:0008152]	2.146e-06	20	425	GPD1 TPS2 PHM8 GSY1 PNC1 AMS1 COQ6 CRG1 TDH1 BNA1 SRY1 GSY2 MET17 YLR345W CYB2 YMR315W YNL134C GPD2 MDH2 GDB1
30°C	sin3∆	Fkh1	Increased	Inhibitor	Decreased	Inhibitor	negative regulation of peptidase activity [GO:0010466]	1.179e-05	3	4	TFS1 PAI3 PBI2
30°C	sin3∆	Fkh1	Increased	Inhibitor	Decreased	Inhibitor	glucose 6-phosphate metabolic process [GO:0051156]	1.179e-05	3	4	GLK1 EMI2 PGM2
30°C	sin3∆	Uga3	Increased	Inhibitor	Increased	Activator	translation [GO:0006412]	1.874e-07	13	318	RPL19B RPS6B RPL31A RPL34B RPL10 RPS31 RPS1A RPL6B RPS1B RPL6A RPL13B RPS6A RPL36B
30°C	sin3∆	Bas1	Increased	Inhibitor	Increased	Activator	cellular amino acid biosynthetic process [GO:0008652]	<1e-14	43	98	MIS1 HIS7 LEU2 HIS4 CTR86 ARO3 ARO1 LYS4 TRP4 HOM3 HIS1 SER3 TRP2 MET6 IRC7 STR3 SER2 LYS12 HIS5 MET28 LYS1 ARG2 ARG3 ILV3 CPA2 STR2 BAT2 MET1 YML096W ADI1 ARG7 ILV2 LEU4 LYS9 ARG1 LEU9 ORT1 SER1 HIS3 CPA1 SAM4 ARO7 ASN1
30°C	sin3∆	Bas1	Increased	Inhibitor	Increased	Activator	translation [GO:0006412]	<1e-14	84	318	RBG1 RPL19B RPS8A RPL32 RPL19A RPS6B RPS9B RPS14A RPL31A RPS16B RPL35A RPL4B RPS17B RPS18A RPL12A RPL34A RPS8B RPL2A YMR31 RPL24A RPL7A RPL28 RPS2 RPL1B RPL9A RPS25A RPL14B RPS20 RPL27A DED81 YHR020W RPS4B RPL2B RPL34B RPL16A MEF2 RPL17B RPS22A RPS14B ANB1 RPL43B RPS5 RPS4A RPL17A RPS21A RPL40B RPL8B RPL15A RPL22A RPL10 RPS31 RPL37A RPL38 RPS25B RPP0 RPL31B RPS1A RPL6B RPS17A RPS18B RPS1B RPL6A R…
30°C	sin3∆	Bas1	Increased	Inhibitor	Increased	Activator	ribosome biogenesis [GO:0042254]	4.998e-10	39	170	RPS6B RPS9B RRP7 KRR1 RPS14A NOP6 ESF1 DBP3 NSA1 RPS2 UTP22 RPS14B MRT4 RPL40B DRS1 RIX7 RPL8B RNP1 DIP2 RPS31 EMG1 RPP0 ERB1 UTP15 RRB1 RRP5 HAS1 NAF1 RPS15 NOP12 BRX1 NOP8 UTP23 YTM1 RRS1 RPS9A RPS6A DIM1 RRP9
30°C	sin3∆	Bas1	Increased	Inhibitor	Increased	Activator	metabolic process [GO:0008152]	2.898e-08	66	425	ACS1 UGA2 ZTA1 MIS1 ADH5 PYC2 HIS7 HIS4 APA1 CHA1 BUD23 GDH2 YDR018C DAS2 ARO3 ARO1 LYS4 TRP4 URA3 HOM3 ALD5 SER3 TMT1 SCW11 SDT1 SER2 BIO2 ARD1 IMD2 HIS5 URA2 CPS1 ACO2 ILV3 CPA2 BAT2 YJR149W MAE1 MET1 MTD1 CTS1 ACO1 CAR2 YLR460C ERG6 ERG13 YML131W PLB2 ARG7 SNZ1 FAA4 ADH6 IDH1 LEU4 NRK1 DUG3 URK1 SMM1 LYS9 DSE4 LEU9 SER1 GDH1 FDH1 POS5 ARO7
30°C	sin3∆	Bas1	Increased	Inhibitor	Increased	Activator	transmembrane transport [GO:0055085]	6.043e-07	49	303	FUI1 FUR4 QDR3 AAC3 YMC2 CTP1 AGP1 ADY2 MCH1 BAP3 VBA4 ATO3 GNP1 SIT1 FTR1 YGL114W TPN1 ZRT1 VHT1 TPC1 MEP1 VMR1 MUP3 ARN2 POR2 QDR2 PHO90 OPT1 YJR124C OAC1 PXA2 GAP1 ATR1 HXT2 VBA1 FET4 AQR1 ESBP6 MEP2 ALP1 MCH4 ENB1 ODC2 MCH5 SSU1 ODC1 PXA1 DIP5 SAM3
30°C	sin3∆	Bas1	Increased	Inhibitor	Increased	Activator	iron ion homeostasis [GO:0055072]	1.625e-06	11	26	SIT1 FTR1 ARN1 ARN2 FRE1 FET3 FET4 FRE4 ENB1 FIT2 FIT3
30°C	sin3∆	Bas1	Increased	Inhibitor	Increased	Activator	arginine biosynthetic process [GO:0006526]	1.713e-06	7	10	ARG2 ARG3 CPA2 ARG7 ARG1 ORT1 CPA1
30°C	sin3∆	Bas1	Increased	Inhibitor	Increased	Activator	ribosomal large subunit assembly [GO:0000027]	3.19e-06	13	38	RPL12A DBP3 YVH1 MRT4 RPF2 DRS1 RPL10 RPP0 RPL6B RPL6A BRX1 RPL25 RPL5
30°C	sin3∆	Bas1	Increased	Inhibitor	Increased	Activator	histidine biosynthetic process [GO:0000105]	4.391e-06	7	11	MIS1 HIS7 HIS4 HIS1 HIS5 BAS1 HIS3
30°C	sin3∆	Bas1	Increased	Inhibitor	Increased	Activator	siderophore transport [GO:0015891]	5.537e-06	6	8	SIT1 ARN1 ARN2 FRE4 FIT2 FIT3
30°C	sin3∆	Bas1	Increased	Inhibitor	Increased	Activator	glutamine metabolic process [GO:0006541]	1.311e-05	9	21	URA7 HIS7 ADE6 URA2 YML096W SNO1 DUG3 CPA1 ASN1
30°C	sin3∆	Bas1	Increased	Inhibitor	Increased	Activator	nitrogen utilization [GO:0019740]	1.551e-05	6	9	ADY2 UGA3 ATO3 UGA1 MEP1 MEP2
30°C	sin3∆	Bas1	Increased	Inhibitor	Increased	Activator	rRNA processing [GO:0006364]	1.709e-05	33	195	RPS6B RPS9B RRP7 KRR1 RPS14A NOP6 BFR2 ESF1 DBP3 NSA1 RPS2 UTP22 NSR1 RPS14B MRT4 RPS21A DRS1 DIP2 EMG1 PWP1 ERB1 UTP15 RRB1 RRP5 HAS1 NAF1 NOP12 UTP23 YTM1 RPS9A RPS6A DIM1 RRP9
30°C	sin3∆	Bas1	Increased	Inhibitor	Increased	Activator	rRNA export from nucleus [GO:0006407]	2.01e-05	10	27	RPS18A SRM1 RPS2 RPS5 RPS18B RPS3 RPS19B RPS15 RPS19A RPS10A
30°C	sin3∆	Bas1	Increased	Inhibitor	Decreased	Inhibitor	oxidation-reduction process [GO:0055114]	1.393e-10	48	272	BDH1 BDH2 ARA1 GPD1 YDL114W YDL124W DLD2 HEM13 YDR541C ARI1 POX1 CTT1 COQ6 GND2 HTD2 GRE3 DOT5 RNR3 KGD1 TDH1 BNA1 BNA2 YJR096W AAD10 GPX1 MCR1 FMP46 SDH2 JLP1 COX8 TSA1 CYB2 NDI1 ERO1 FMS1 ARA2 ALD3 YMR315W IDP3 YNL134C SPS19 GPD2 MDH2 FRE7 GCY1 ALD4 OYE3 YPR127W
30°C	sin3∆	Bas1	Increased	Inhibitor	Decreased	Inhibitor	metabolic process [GO:0008152]	4.148e-08	58	425	BDH1 BDH2 NTH2 YBR056W TKL2 GPM2 GPD1 YDL114W NTH1 TPS2 URH1 APA2 YDR541C PHM8 AGX1 SNZ3 PMC1 PNC1 AMS1 ARI1 POX1 NQM1 COQ6 GND2 DOG1 CRG1 RNR3 SGA1 KGD1 POT1 TDH1 INO1 BNA1 PGU1 GFA1 MCD4 ADE16 BNA5 GSY2 MET17 YLR345W CYB2 YMR090W ALD3 SCW10 YMR315W LAP2 YNL134C SPS19 SNZ2 DDI3 GPD2 MDH2 SPR1 ALD4 OYE3 GDB1 HPA2
30°C	sin3∆	Bas1	Increased	Inhibitor	Decreased	Inhibitor	thiamine biosynthetic process [GO:0009228]	3.194e-07	9	17	THI13 THI5 SNZ3 SNO3 RPI1 THI11 THI12 SNZ2 THI20
30°C	sin3∆	Bas1	Increased	Inhibitor	Decreased	Inhibitor	carbohydrate metabolic process [GO:0005975]	4.933e-07	21	94	YBR056W GLK1 GPD1 EMI2 GLC3 PMI40 AMS1 NQM1 SOL4 PKP1 SGA1 PGU1 GFA1 PGM2 SCW10 GLC8 GPD2 MDH2 SPR1 GPH1 GDB1
30°C	sin3∆	Bas1	Increased	Inhibitor	Decreased	Inhibitor	ATP synthesis coupled proton transport [GO:0015986]	4.687e-06	8	17	ATP1 ATP3 ATP5 ATP17 ATP2 ATP7 ATP4 ATP15
30°C	sin3∆	Bas1	Increased	Inhibitor	Decreased	Inhibitor	response to stress [GO:0006950]	1.582e-05	25	152	HSP26 TPS1 BSD2 GPD1 FMP45 NTH1 TPS2 HSP31 SSA4 HSP12 PAU5 CTT1 WSC4 GRE3 FMC1 XBP1 KAR2 SSC1 DAN4 HSP104 UBI4 ICT1 TSL1 DDR48 GRE1
30°C	sin3∆	Swi4	Increased	Inhibitor	Increased	Activator	ribosome biogenesis [GO:0042254]	1.247e-10	25	170	MAK5 RPS9B ENP1 RRP7 DBP3 BCD1 IPI1 IMP3 DBP8 FAF1 MRT4 RPL8B DIP2 EMG1 UTP15 RRB1 RRP5 IPI3 BRX1 NOP8 UTP23 YTM1 RPS9A NIP7 NOC4
30°C	sin3∆	Swi4	Increased	Inhibitor	Increased	Activator	rRNA processing [GO:0006364]	1.004e-06	21	195	MAK5 RPS9B ENP1 RRP7 DBP3 IPI1 IMP3 DBP8 MRT4 DIP2 EMG1 UTP15 RRB1 RRP5 RNT1 IPI3 UTP23 YTM1 RPS9A NIP7 NOC4
30°C	sin3∆	Swi4	Increased	Inhibitor	Increased	Activator	cytokinesis, completion of separation [GO:0007109]	1.314e-05	5	11	DSE1 DSE2 CTS1 DSE4 ASE1
30°C	sin3∆	Swi4	Increased	Inhibitor	Decreased	Inhibitor	carbohydrate metabolic process [GO:0005975]	3.124e-07	13	94	YBR056W GLK1 EMI2 AMS1 NQM1 SOL4 SCW4 PKP1 SGA1 IMA5 GFA1 PGM2 MDH2
30°C	sin3∆	Ume6	Increased	Inhibitor	Increased	Activator	ribosome biogenesis [GO:0042254]	<1e-14	43	170	MAK5 ENP1 REI1 PWP2 NOP1 NOP14 NUG1 LCP5 DBP3 UTP22 ENP2 PXR1 BCD1 RRP3 IMP3 FAF1 UTP25 RPL40A UTP18 MRT4 RPL40B DRS1 RIX7 RNP1 RLP24 EMG1 UTP13 UTP21 ERB1 UTP15 RRB1 RRP5 HAS1 IPI3 NOG2 BRX1 YTM1 NOP4 RPS9A NIP7 DIM1 RRP9 NOC4
30°C	sin3∆	Ume6	Increased	Inhibitor	Increased	Activator	rRNA processing [GO:0006364]	4.428e-12	36	195	MAK5 ENP1 PWP2 NOP1 NOP14 BFR2 NUG1 LCP5 DBP3 UTP22 ENP2 NSR1 EFG1 PXR1 RRP3 IMP3 UTP25 UTP18 MRT4 DRS1 EMG1 UTP13 UTP21 ERB1 UTP15 RRB1 RRP5 HAS1 IPI3 YTM1 NOP4 RPS9A NIP7 DIM1 RRP9 NOC4
30°C	sin3∆	Ume6	Increased	Inhibitor	Increased	Activator	reciprocal meiotic recombination [GO:0007131]	3.687e-11	17	47	RDH54 MEC1 MSH5 UME6 ZIP1 ECM11 MSH4 HOP2 MND1 ZIP2 SAE3 REC104 RED1 REC102 REC114 NDJ1 MEI5
30°C	sin3∆	Ume6	Increased	Inhibitor	Increased	Activator	meiosis [GO:0007126]	5.864e-11	28	134	RDH54 MEC1 PCH2 ADY2 CDC7 ZIP1 MEI4 MSH4 HOP2 MND1 ZIP2 SPO11 SPO13 SAE3 SPO12 SPO16 REC104 CSM2 YVH1 IME2 RED1 REC102 PDS5 REC114 NDJ1 SGO1 MEK1 MEI5
30°C	sin3∆	Ume6	Increased	Inhibitor	Increased	Activator	cellular amino acid biosynthetic process [GO:0008652]	5.409e-08	20	98	HIS7 ARO3 HOM3 MET6 IRC7 STR3 ARG4 HIS6 LYS12 HIS5 MET28 LYS1 ARG3 BAT2 ARG7 ARG1 LEU9 SER1 HIS3 SAM4
30°C	sin3∆	Ume6	Increased	Inhibitor	Increased	Activator	ribosomal small subunit biogenesis [GO:0042274]	1.202e-06	9	24	NOP14 ENP2 UTP25 LTV1 EMG1 UTP21 KRE33 RPS19A NOC4
30°C	sin3∆	Ume6	Increased	Inhibitor	Increased	Activator	ribosomal large subunit biogenesis [GO:0042273]	9.063e-06	10	37	MAK16 MAK5 REI1 PUF6 MRT4 RIX7 RLP24 ERB1 YTM1 NIP7
30°C	sin3∆	Ume6	Increased	Inhibitor	Increased	Activator	ribosomal large subunit assembly [GO:0000027]	1.176e-05	10	38	RSA4 DBP3 SQT1 YVH1 MRT4 RPF2 DRS1 IPI3 BRX1 NIP7
30°C	sin3∆	Ume6	Increased	Inhibitor	Decreased	Inhibitor	thiamine biosynthetic process [GO:0009228]	7.269e-09	8	17	THI13 THI5 SNZ3 RPI1 THI11 THI12 SNZ2 THI20
30°C	sin3∆	Ume6	Increased	Inhibitor	Decreased	Inhibitor	oxidation-reduction process [GO:0055114]	2.313e-06	23	272	ADH7 YDL114W DLD2 HEM13 DIT2 ARI1 CTT1 AIM17 DOT5 RNR3 KGD1 TDH1 BNA1 BNA2 SOR1 MCR1 CYB2 FMS1 ALD3 IDP3 MDH2 GCY1 ALD4
30°C	sin3∆	Yap7	Increased	Inhibitor	Increased	Activator	translation [GO:0006412]	<1e-14	45	318	RPL19B RPL23A RPL4A RPL19A TEF2 RPS6B RPL31A RPL35A RPL4B RPS17B RPS18A RPL23B RPL22B RPL24A RPL28 RPL26B TYS1 RPL14B RPL27A RPS27B RPS24B RPL40A RPS21B RPS22A RPL43B RPL14A RPS21A RPL40B RPL22A RPS31 RPL37A RPS28B RPL38 RPS25B RPP0 RPL31B RPS17A RPS18B RPS3 RPL25 RPS30B RPS10A RPL20B RPS12 RPS6A
30°C	sin3∆	Rgm1	Increased	Inhibitor	Decreased	Inhibitor	glycogen biosynthetic process [GO:0005978]	1.251e-06	5	12	GLC3 GSY1 GSY2 PGM2 GDB1
30°C	sin3∆	Rgm1	Increased	Inhibitor	Decreased	Inhibitor	trehalose biosynthetic process [GO:0005992]	3.367e-06	4	7	TPS1 TPS2 TSL1 PGM2
30°C	sin3∆	Rgm1	Increased	Inhibitor	Decreased	Inhibitor	oxidation-reduction process [GO:0055114]	6.32e-06	17	272	BDH2 GPD1 YDL124W DIT2 POX1 CTT1 AIM17 TDH1 GPX1 MCR1 SDH2 COX8 NDI1 ALD3 YMR315W YNL134C ALD4
30°C	sin3∆	Rgm1	Increased	Inhibitor	Decreased	Inhibitor	response to stress [GO:0006950]	1.632e-05	12	152	TPS1 GPD1 TPS2 HSP12 PAU5 CTT1 MSN4 HSP104 UBI4 ICT1 TSL1 ZEO1
30°C	sin3∆	Rgm1	Increased	Inhibitor	Decreased	Inhibitor	ethanol metabolic process [GO:0006067]	2.254e-05	3	4	PDC6 SYM1 ALD4
30°C	sin3∆	Ash1	Increased	Inhibitor	Increased	Activator	detoxification of cadmium ion [GO:0071585]	1.376e-05	2	2	CUP1-1 CUP1-2
30°C	sin3∆	Ash1	Increased	Inhibitor	Increased	Activator	detoxification of copper ion [GO:0010273]	1.376e-05	2	2	CUP1-1 CUP1-2
30°C	sin3∆	Yhp1	Increased	Inhibitor	Increased	Activator	iron ion homeostasis [GO:0055072]	1.129e-07	8	26	SIT1 FTR1 ARN1 FRE1 FET3 FET4 ENB1 FRE3
30°C	sin3∆	Yhp1	Increased	Inhibitor	Increased	Activator	cell cycle [GO:0007049]	1.386e-07	25	316	MCM2 SHE1 BRN1 MCM7 YHP1 DSE1 CDC20 MCM6 ZIP2 DBF2 CLB6 BNS1 PCL5 AIM20 CDC6 BFA1 MCM5 HOF1 SUN4 EGT2 NUF2 SLK19 NUD1 IQG1 KAR3
30°C	sin3∆	Yhp1	Increased	Inhibitor	Increased	Activator	cell division [GO:0051301]	1.361e-05	16	190	SHE1 BRN1 DSE1 CDC20 CLB6 PCL5 CDC6 BFA1 HOF1 SUN4 EGT2 NUF2 SLK19 NUD1 IQG1 KAR3
30°C	sin3∆	Yhp1	Increased	Inhibitor	Decreased	Inhibitor	response to stress [GO:0006950]	3.168e-06	15	152	HSP26 FMP45 NTH1 TPS2 HSP31 SSA4 HSP12 CTT1 FMC1 KAR2 MSN4 HSP104 ICT1 TSL1 DDR48
30°C	sin3∆	Yhp1	Increased	Inhibitor	Decreased	Inhibitor	mitochondrial translation [GO:0032543]	7.22e-06	11	88	MRP10 RSM10 MRP20 MRF1 RSM27 RRF1 MRPL31 MRPL38 MRPL44 RSM19 MRP2
30°C	sin3∆	Hcm1	Increased	Inhibitor	Increased	Activator	positive regulation of cell cycle [GO:0045787]	9.635e-06	2	2	FKH1 FKH2
30°C	sin3∆	Hcm1	Increased	Inhibitor	Decreased	Inhibitor	cell adhesion [GO:0007155]	8.255e-07	3	7	HSP12 AGA2 AGA1
30°C	sin3∆	Swi5	Increased	Inhibitor	Increased	Activator	translation [GO:0006412]	3.815e-13	22	318	RPL4A TEF2 RPL31A RPL35A RPS17B RPL23B RPL24A RPL26B RPL27A RPS27B RPS24B RPL43B RPS4A RPS21A RPL37A RPS25B RPP0 RPL25 RPL3 RPS30B RPS10A RPL43A
30°C	sin3∆	Swi5	Increased	Inhibitor	Increased	Activator	cytokinesis, completion of separation [GO:0007109]	3.411e-06	4	11	DSE1 SCW11 DSE2 CTS1
30°C	sin3∆	Swi5	Increased	Inhibitor	Increased	Activator	metabolic process [GO:0008152]	2.382e-05	15	425	ADH5 NFS1 APA1 LYS21 GDH2 URA3 ALD5 SCW11 YGL039W SDT1 BAT1 BAT2 CTS1 GDH1 FCY1
30°C	sin3∆	Swi5	Increased	Inhibitor	Decreased	Inhibitor	response to pheromone [GO:0019236]	1.271e-05	4	34	STE2 BAR1 STE6 AGA1
30°C	sin3∆	Ifh1	Increased	Inhibitor	Increased	Activator	maturation of SSU-rRNA from tricistronic rRNA transcript (SSU-rRNA, 5.8S rRNA, LSU-rRNA) [GO:0000462]	<1e-14	18	60	RPS8A RPS11B RPS9B RPS14A RPS16B FAL1 RPS13 RPS24A UTP22 RPS20 RPS27B RPS14B RPS1A RPS1B RPS16A RPS9A RPS6A RPS23B
30°C	sin3∆	Ifh1	Increased	Inhibitor	Increased	Activator	translation [GO:0006412]	<1e-14	94	318	RPL19B RPS8A RPL23A RPL32 RPL4A RPS11B RPS9B RPS14A RPL31A RPS16B RPP1B RPL35A RPL4B RPS13 RPP2B RPL12B RPS18A HYP2 RPL12A RPL34A RPS24A RPL22B RPL2A RPL30 RPL24A RPL7A RPL28 RPS2 RPL9A RPS25A RPS0A RPL14B RPS20 RPL27A YHR020W RPS27B RPL2B RPL34B RPL16A RPL40A RPS21B RPL17B RPS22A RPS14B RPL43B RPS5 RPS4A RPL14A RPL17A RPS21A RPL8B RPL15A RPS0B RPL22A RPL10 RPS31 RPL37A RPS28B RPL38 RPS25B RPP0 R…
30°C	sin3∆	Ifh1	Increased	Inhibitor	Increased	Activator	rRNA export from nucleus [GO:0006407]	1.025e-12	11	27	RPS18A RPS2 RPS0A RPS5 RPS0B RPS28B RPS18B RPS3 RPS19B RPS15 RPS10A
30°C	sin3∆	Ifh1	Increased	Inhibitor	Increased	Activator	ribosomal small subunit assembly [GO:0000028]	4.647e-11	8	14	RPS11B RPS14A RPS0A RPS27B RPS14B RPS0B RPS31 RPS17A
30°C	sin3∆	Ifh1	Increased	Inhibitor	Increased	Activator	ribosomal large subunit assembly [GO:0000027]	7.922e-11	11	38	RPL12B RPL12A DRS1 RPL10 RPP0 RPL6B RPL6A RPL25 RPL3 RPL5 RPL11A
30°C	sin3∆	Ifh1	Increased	Inhibitor	Increased	Activator	ribosome biogenesis [GO:0042254]	2.505e-08	17	170	RPS9B RPS14A FAL1 RPS2 UTP22 RPS0A RPL40A RPS14B DRS1 RPL8B RPS0B RPS31 RPP0 RPS15 RPS7A RPS9A RPS6A
30°C	sin3∆	Ifh1	Increased	Inhibitor	Increased	Activator	endonucleolytic cleavage to generate mature 3'-end of SSU-rRNA from (SSU-rRNA, 5.8S rRNA, LSU-rRNA) [GO:0000461]	1.391e-07	4	4	RPS0A RPS21B RPS21A RPS0B
30°C	sin3∆	Ifh1	Increased	Inhibitor	Increased	Activator	rRNA processing [GO:0006364]	5.125e-06	15	195	RPS9B RPS14A FAL1 RPL30 RPS2 UTP22 RPS0A RPS21B RPS14B RPS21A DRS1 RPS0B RPS7A RPS9A RPS6A
30°C	sin3∆	Aft1	Increased	Inhibitor	Increased	Activator	iron ion homeostasis [GO:0055072]	4.063e-12	12	26	SIT1 FTR1 ARN1 ARN2 FRE1 FET3 FET4 FRE4 ENB1 FRE3 FIT2 FIT3
30°C	sin3∆	Aft1	Increased	Inhibitor	Increased	Activator	siderophore transport [GO:0015891]	2.028e-10	7	8	SIT1 ARN1 ARN2 FRE4 FRE3 FIT2 FIT3
30°C	sin3∆	Aft1	Increased	Inhibitor	Increased	Activator	ion transport [GO:0006811]	9.277e-07	15	107	ADY2 SIT1 FTR1 ZRT1 ARN1 ARN2 QDR2 FRE1 FET3 FET4 FRE4 ENB1 FRE3 FIT2 FIT3
30°C	sin3∆	Aft1	Increased	Inhibitor	Increased	Activator	translation [GO:0006412]	1.63e-06	27	318	RPL32 RPL19A RPP1B RPL35A KRS1 YDR341C RPL7A RPS25A RPL27A DED81 YHR020W RPS22A RPL8B RPL15A RPL22A RPS25B RPP0 RPS18B RPS3 RPL18B RPS12 RPS9A RPL5 RPL1A HTS1 RPL43A RPL11A
30°C	sin3∆	Aft1	Increased	Inhibitor	Increased	Activator	ribosomal small subunit biogenesis [GO:0042274]	5.724e-06	7	24	KRR1 NOP6 ENP2 RRP14 LTV1 KRE33 NOC4
30°C	sin3∆	Aft1	Increased	Inhibitor	Increased	Activator	transmembrane transport [GO:0055085]	2.108e-05	24	303	FUI1 FUR4 CTP1 MAL31 AGP1 ADY2 GGC1 SIT1 FTR1 ZRT1 VHT1 VMR1 ARN2 QDR2 GAP1 HXT2 FET4 MEP2 ALP1 MCH4 ENB1 MCH5 MEP3 OPT2
30°C	sin3∆	Aft1	Increased	Inhibitor	Decreased	Inhibitor	metabolic process [GO:0008152]	5.231e-07	29	425	BDH2 NTH2 TKL2 GPM2 APA2 PHM8 SEC53 SNZ3 GSY1 PMC1 AMS1 POX1 NQM1 GND2 CRG1 RNR3 SGA1 POT1 INO1 SOR1 GSY2 MET17 CYB2 ALD3 SCW10 SPS19 ALD4 OYE3 GDB1
30°C	sin3∆	Aft1	Increased	Inhibitor	Decreased	Inhibitor	thiamine biosynthetic process [GO:0009228]	2.19e-06	6	17	THI13 THI5 SNZ3 THI11 THI12 THI20
30°C	sin3∆	Aft1	Increased	Inhibitor	Decreased	Inhibitor	glycogen biosynthetic process [GO:0005978]	6.303e-06	5	12	GLC3 GSY1 GSY2 PGM2 GDB1
30°C	sin3∆	Aft1	Increased	Inhibitor	Decreased	Inhibitor	oxidation-reduction process [GO:0055114]	1.244e-05	20	272	BDH2 YDL124W DIT2 POX1 GND2 AIM17 RNR3 BNA2 SOR1 GPX1 MCR1 CYB2 ERO1 ARA2 ALD3 IDP3 SPS19 FRE7 ALD4 OYE3
30°C	sin3∆	Aft1	Increased	Inhibitor	Decreased	Inhibitor	hexose transport [GO:0008645]	1.53e-05	5	14	HXT7 HXT4 HXT5 HXT9 HXT11
30°C	sin3∆	Aft1	Increased	Inhibitor	Decreased	Inhibitor	glycogen catabolic process [GO:0005980]	1.533e-05	3	3	SGA1 GPH1 GDB1
30°C	sin3∆	Gat1	Increased	Inhibitor	Increased	Activator	ribosomal large subunit assembly [GO:0000027]	<1e-14	21	38	RSA4 RPL12B RPL12A DBP3 SSF1 IPI1 RIX1 SQT1 YVH1 MRT4 DBP7 RPF2 DRS1 RPP0 RPL6B RPL6A IPI3 BRX1 REX4 RPL5 NIP7
30°C	sin3∆	Gat1	Increased	Inhibitor	Increased	Activator	maturation of SSU-rRNA from tricistronic rRNA transcript (SSU-rRNA, 5.8S rRNA, LSU-rRNA) [GO:0000462]	<1e-14	32	60	RPS6B RPS9B PWP2 RPS16B NOP14 FAL1 RPS13 UTP4 UTP6 SNU13 SLX9 UTP22 NOP7 EFG1 RPS20 RPS27B RRP3 FAF1 RPS24B UTP25 RPS14B DHR2 FYV7 DIP2 UTP13 TSR2 RPS1A RPS1B UTP15 ECM16 RPS16A RRP36
30°C	sin3∆	Gat1	Increased	Inhibitor	Increased	Activator	ribosome biogenesis [GO:0042254]	<1e-14	80	170	MAK5 RPS6B RPS9B ENP1 REI1 RRP7 SPB1 KRR1 PWP2 NOP1 NOP14 NOP6 FAL1 UTP4 ESF1 UTP6 SNU13 NUG1 LCP5 CGR1 DBP3 NSA1 ROK1 SLX9 UTP22 NOP7 ENP2 PXR1 BCD1 RRP3 SSF1 IPI1 IMP3 DBP8 RIX1 FAF1 UTP25 RPL40A HCA4 UTP18 RPS14B MRT4 DHR2 RRP14 DBP7 UTP30 RPL40B DRS1 RIX7 RLP24 RPS0B DIP2 EMG1 UTP13 RPP0 UTP21 ERB1 UTP15 ECM16 RRB1 RRP5 HAS1 NOP2 IPI3 NOG2 RCL1 NOP12 BRX1 NOP8 UTP23 RPS7A YTM1 RRP36 RRS1 NOP4…
30°C	sin3∆	Gat1	Increased	Inhibitor	Increased	Activator	rRNA processing [GO:0006364]	<1e-14	78	195	MAK5 RPS6B RPS9B ENP1 RRP7 SPB1 KRR1 PWP2 NOP1 NOP14 NOP6 FAL1 BFR2 UTP4 ESF1 UTP6 SNU13 NUG1 LCP5 CGR1 RPL30 DBP3 NSA1 ROK1 SLX9 UTP22 NOP7 ENP2 NSR1 EFG1 PXR1 RRP3 IPI1 IMP3 DBP8 RIX1 UTP25 HCA4 UTP18 RPS14B MRT4 DHR2 RRP14 DBP7 RPS21A UTP30 DRS1 RPS0B FYV7 DIP2 EMG1 PWP1 UTP13 UTP21 TSR2 ERB1 UTP15 ECM16 RRB1 RRP5 RNT1 HAS1 NOP2 IPI3 POP1 NOP12 REX4 UTP23 RPS7A YTM1 RRP36 NOP4 NIP7 DIM1 MRD1 R…
30°C	sin3∆	Gat1	Increased	Inhibitor	Increased	Activator	cellular amino acid biosynthetic process [GO:0008652]	<1e-14	35	98	MIS1 HIS7 HIS4 THR4 CTR86 LYS21 LYS20 ARO1 HOM3 HIS1 SER3 TRP2 MET6 TRP5 STR3 ARG4 THR1 ARG2 ARG3 CPA2 BAT2 MET1 YML082W YML096W ADI1 ARG7 LEU4 LYS9 ARG1 LEU9 SER1 CPA1 SAM4 ARO7 ASN1
30°C	sin3∆	Gat1	Increased	Inhibitor	Increased	Activator	translation [GO:0006412]	<1e-14	68	318	MAK16 RBG1 RPL32 RPL19A TEF2 RPS6B RPS9B SRO9 RPL31A RPS16B RPL4B KRS1 RPS13 YDR341C RPL12B RPS17B RPL12A RPL34A YMR31 RPL30 RPL24A RPL7A RPL1B RPL9A RPL26B RPS20 RPL27A YHR020W RPS27B RPS4B RPS24B RPL16A RPL40A RPL17B RPS22A RPS14B ANB1 RPS4A RPS21A RPL40B RLP24 RPL15A RPS0B RPL22A RPS28B RPS25B RPP0 RPL31B RPS1A RPL6B RPS18B RPS1B RPL6A RPS16A RPL20A RPS3 RPL18B RPS19B RPP2A BRX1 RPS19A RPS7A G…
30°C	sin3∆	Gat1	Increased	Inhibitor	Increased	Activator	ribosomal small subunit biogenesis [GO:0042274]	8.737e-14	16	24	KRR1 NOP14 NOP6 ENP2 UTP25 RRP14 LTV1 UTP30 EMG1 SGD1 UTP21 KRE33 RPS19B RPS19A RRP36 NOC4
30°C	sin3∆	Gat1	Increased	Inhibitor	Increased	Activator	endonucleolytic cleavage in ITS1 to separate SSU-rRNA from 5.8S rRNA and LSU-rRNA from tricistronic rRNA transcript (SSU-rRNA, 5.8S rRNA, LSU-rRNA) [GO:0000447]	1.456e-13	20	40	ENP1 KRR1 BUD23 PWP2 NOP14 UTP6 DBP8 UTP18 RPS21A RPS0B DIP2 EMG1 UTP13 RPS18B RRP5 RCL1 UTP23 RRS1 MRD1 NOC4
30°C	sin3∆	Gat1	Increased	Inhibitor	Increased	Activator	endonucleolytic cleavage in 5'-ETS of tricistronic rRNA transcript (SSU-rRNA, 5.8S rRNA, LSU-rRNA) [GO:0000480]	5.637e-09	13	27	PWP2 NOP14 UTP6 DBP8 UTP18 DIP2 EMG1 UTP13 RRP5 RCL1 UTP23 MRD1 NOC4
30°C	sin3∆	Gat1	Increased	Inhibitor	Increased	Activator	ribosomal large subunit biogenesis [GO:0042273]	7.036e-09	15	37	MAK16 MAK5 REI1 PUF6 NSA1 NOP7 MRT4 RRP14 RIX7 RLP24 ERB1 NOP8 YTM1 RRS1 NIP7
30°C	sin3∆	Gat1	Increased	Inhibitor	Increased	Activator	endonucleolytic cleavage to generate mature 5'-end of SSU-rRNA from (SSU-rRNA, 5.8S rRNA, LSU-rRNA) [GO:0000472]	1.677e-08	13	29	PWP2 NOP14 UTP6 DBP8 UTP18 DIP2 EMG1 UTP13 RRP5 RCL1 UTP23 MRD1 NOC4
30°C	sin3∆	Gat1	Increased	Inhibitor	Increased	Activator	glutamine metabolic process [GO:0006541]	3.953e-07	10	21	URA7 HIS7 ADE6 URA2 YML096W SNO1 GUA1 DUG3 CPA1 ASN1
30°C	sin3∆	Gat1	Increased	Inhibitor	Increased	Activator	arginine biosynthetic process [GO:0006526]	7.163e-07	7	10	ARG4 ARG2 ARG3 CPA2 ARG7 ARG1 CPA1
30°C	sin3∆	Gat1	Increased	Inhibitor	Increased	Activator	methylation [GO:0032259]	9.235e-07	18	71	HMT1 SPB1 BUD23 NOP1 TRM1 RMT2 MET6 TMT1 MET1 EMG1 ERG6 NOP2 TRM11 TRM13 PPM2 TGS1 DIM1 SAM4
30°C	sin3∆	Gat1	Increased	Inhibitor	Increased	Activator	nitrogen utilization [GO:0019740]	7.377e-06	6	9	ADY2 ATO3 UGA1 MEP1 MEP2 MEP3
30°C	sin3∆	Gat1	Increased	Inhibitor	Increased	Activator	transmembrane transport [GO:0055085]	8.475e-06	42	303	FUI1 FUR4 QDR3 AAC3 YMC2 CTP1 AGP1 ADY2 GGC1 VBA4 ATO3 GNP1 CAN1 SIT1 FCY2 KAP123 FTR1 HNM1 ZRT1 VHT1 MEP1 MUP3 PHO90 OPT1 YJR124C HOT13 OAC1 GAP1 YML018C ATR1 HXT2 VBA1 ZRC1 ESBP6 MEP2 MCH4 MCH5 SSU1 DIP5 SAM3 MEP3 OPT2
30°C	sin3∆	Gat1	Increased	Inhibitor	Increased	Activator	ammonium transport [GO:0015696]	8.708e-06	5	6	ADY2 ATO3 MEP1 MEP2 MEP3
30°C	sin3∆	Gat1	Increased	Inhibitor	Decreased	Inhibitor	metabolic process [GO:0008152]	6.436e-09	50	425	BDH2 NTH2 YBR056W TKL2 ADH7 GPM2 GPD1 NTH1 ENA1 TPS2 APA2 PHM8 AGX1 SEC53 GSY1 BNA6 PMC1 PNC1 AMS1 NQM1 COQ6 GND2 SCW4 DOG2 CRG1 NEO1 SGA1 KGD1 POT1 TDH1 INO1 MCD4 SRY1 ADE16 BNA5 GSY2 MET17 YLR345W CYB2 YMR090W ALD3 SCW10 LAP2 YNL134C SPS19 MDH2 ALD4 HAT1 OYE3 GDB1
30°C	sin3∆	Gat1	Increased	Inhibitor	Decreased	Inhibitor	oxidation-reduction process [GO:0055114]	5.218e-07	34	272	BDH2 ARA1 ADH7 GPD1 YDL124W DLD2 HEM13 CTT1 COQ6 GND2 AIM17 GRE3 DOT5 KGD1 TDH1 BNA2 YJR096W FMP46 SDH2 JLP1 TSA1 CYB2 NDI1 ERO1 ARA2 ALD3 IDP3 YNL134C SPS19 MDH2 GCY1 ALD4 OYE3 YPR127W
30°C	sin3∆	Gat1	Increased	Inhibitor	Decreased	Inhibitor	carbohydrate metabolic process [GO:0005975]	3.127e-06	17	94	YBR056W GLK1 GPD1 EMI2 GLC3 AMS1 NQM1 SOL4 SCW4 PKP1 SGA1 PGM2 SCW10 GLC8 MDH2 GPH1 GDB1
30°C	sin3∆	Gat1	Increased	Inhibitor	Decreased	Inhibitor	glycogen biosynthetic process [GO:0005978]	1.066e-05	6	12	GLC3 GSY1 GSY2 PGM2 GLC8 GDB1
30°C	sin3∆	Gat1	Increased	Inhibitor	Decreased	Inhibitor	response to stress [GO:0006950]	1.88e-05	21	152	TPS1 GPD1 FMP45 NTH1 TPS2 DFM1 HSP31 SSA4 CTT1 WSC4 GRE3 XBP1 MSN4 MNN4 HSP104 ICT1 DAK1 TSL1 DDR48 ZEO1 GRE1
30°C	srb2∆	Rgm1	Decreased	Activator	Decreased	Activator	oxidation-reduction process [GO:0055114]	2.353e-07	22	272	BDH2 RFS1 AAD3 YDL124W DIT2 POX1 CTT1 AIM17 TDH1 GPX1 YKL071W MCR1 SDH2 IDP2 NDI1 ALD3 ALD2 YMR315W YNL134C GOR1 AAD15 ALD4
30°C	srb2∆	Rgm1	Decreased	Activator	Decreased	Activator	tricarboxylic acid cycle [GO:0006099]	4.068e-06	7	30	SDH4 LSC2 SDH3 SDH2 IDP2 CIT1 CIT3
30°C	srb2∆	Rgm1	Decreased	Activator	Decreased	Activator	glycogen biosynthetic process [GO:0005978]	4.347e-06	5	12	GLC3 GSY1 GSY2 PGM2 GDB1
30°C	srb2∆	Rgm1	Decreased	Activator	Decreased	Activator	trehalose biosynthetic process [GO:0005992]	9.191e-06	4	7	TPS1 TPS2 TSL1 PGM2
30°C	srb2∆	Rgm1	Decreased	Activator	Decreased	Activator	metabolic process [GO:0008152]	1.238e-05	25	425	BDH2 YBR056W TPS2 GSY1 HXK1 PNC1 POX1 LSC2 DOG1 SGA1 TDH1 YKL071W PDC5 GSY2 ECI1 FBP1 YMR084W ALD3 ALD2 YMR196W YMR315W YNL134C GOR1 ALD4 GDB1
30°C	srb2∆	Rsf2	Decreased	Activator	Increased	Inhibitor	iron ion homeostasis [GO:0055072]	1.297e-06	6	26	ARN1 ARN2 FRE1 FRE4 ENB1 FIT2
30°C	srb2∆	Rsf2	Decreased	Activator	Increased	Inhibitor	siderophore transport [GO:0015891]	2.582e-06	4	8	ARN1 ARN2 FRE4 FIT2
30°C	srb2∆	Rsf2	Decreased	Activator	Decreased	Activator	oxidation-reduction process [GO:0055114]	2.123e-08	21	272	GDH3 UGA2 NDE2 DIT2 CTT1 GND2 AIM17 HTD2 OYE2 GND1 GUT2 AAD10 YKL107W CCP1 XYL2 AIM33 NDI1 ALD3 ALD2 GOR1 FRE7
30°C	srb2∆	Tye7	Decreased	Activator	Increased	Inhibitor	translation [GO:0006412]	<1e-14	73	318	MAK16 RPL19B RPL23A RPL32 RPL4A RPL19A RPS6B RPL31A RPP1A RPS16B RPL35B RPL35A SSB1 RPL4B RPS13 GIR2 RPS17B RPS18A GCD11 RPL23B RPL30 RPL24A RPL28 RPS26A RPS25A RPL26B RPS23A RPL24B TYS1 RPL14B RPL27A DED81 RPS27B SSZ1 RPL34B RPS24B RPL16A RPL40A RPS21B RPS22A RPL43B RPL14A RPS21A RPL40B RLP24 FRS1 RPL22A RPS31 RPL37A RPS28B RPL38 RPS25B RPP0 RPL31B RPS17A RPS18B RPL6A RPL20A TIF11 IMP4 RPS3 RPS1…
30°C	srb2∆	Tye7	Decreased	Activator	Increased	Inhibitor	ribosome biogenesis [GO:0042254]	<1e-14	37	170	RPS6B RRP7 SPB1 KRR1 NOP1 NHP2 FCF1 UTP6 NOP16 PXR1 FAF1 RPL40A ALB1 MRT4 UTP11 EBP2 RPL40B RLP24 SDO1 FCF2 RPS31 RSA3 RPP0 UTP14 IMP4 NOP15 KRI1 RPS15 NOP8 UTP23 BUD21 RRP36 RRS1 NOP4 RPS6A NOP53 NIP7
30°C	srb2∆	Tye7	Decreased	Activator	Increased	Inhibitor	rRNA processing [GO:0006364]	<1e-14	38	195	RPS6B RRP7 SPB1 KRR1 NOP1 NHP2 SSB1 FCF1 UTP6 NOP16 RPL30 RRP46 PXR1 ZUO1 SSZ1 RPS21B MRT4 UTP11 EBP2 RPS21A SDO1 FCF2 FYV7 TSR2 UTP14 IMP4 NOP15 KRI1 MPP6 REX4 UTP23 BUD21 RRP36 NOP4 RPS6A NOP53 NIP7 TIF6
30°C	srb2∆	Tye7	Decreased	Activator	Increased	Inhibitor	endonucleolytic cleavage in ITS1 to separate SSU-rRNA from 5.8S rRNA and LSU-rRNA from tricistronic rRNA transcript (SSU-rRNA, 5.8S rRNA, LSU-rRNA) [GO:0000447]	2.463e-12	14	40	KRR1 FCF1 UTP6 RPS18A RPS21B UTP11 RPS21A FCF2 RPS18B UTP14 KRI1 UTP23 BUD21 RRS1
30°C	srb2∆	Tye7	Decreased	Activator	Increased	Inhibitor	ribosomal large subunit biogenesis [GO:0042273]	4.408e-09	11	37	MAK16 NOP16 ALB1 MRT4 RLP24 SDO1 NOP15 NOP8 RRS1 NIP7 TIF6
30°C	srb2∆	Tye7	Decreased	Activator	Increased	Inhibitor	maturation of SSU-rRNA from tricistronic rRNA transcript (SSU-rRNA, 5.8S rRNA, LSU-rRNA) [GO:0000462]	1.175e-08	13	60	RPS6B RPS16B RPS13 UTP6 RPS23A RPS27B FAF1 RPS24B FYV7 TSR2 BUD21 RRP36 RPS6A
30°C	srb2∆	Tye7	Decreased	Activator	Increased	Inhibitor	rRNA export from nucleus [GO:0006407]	3.844e-08	9	27	RPS18A RPS26A RPS28B RPS18B RPS3 RPS19B RPS15 RPS19A RPS10A
30°C	srb2∆	Tye7	Decreased	Activator	Increased	Inhibitor	regulation of translational fidelity [GO:0006450]	1.1e-07	6	10	RPL31A SSB1 RPS23A ZUO1 SSZ1 RPL31B
30°C	srb2∆	Tye7	Decreased	Activator	Increased	Inhibitor	maturation of LSU-rRNA from tricistronic rRNA transcript (SSU-rRNA, 5.8S rRNA, LSU-rRNA) [GO:0000463]	3.962e-07	7	18	MAK16 SPB1 RPL35B RPL35A RPF2 NOP53 TIF6
30°C	srb2∆	Tye7	Decreased	Activator	Increased	Inhibitor	ribosomal large subunit assembly [GO:0000027]	1.012e-06	9	38	MRT4 RPF2 RSA3 RPP0 RPL6A REX4 RPL25 RPL3 NIP7
30°C	srb2∆	Tye7	Decreased	Activator	Increased	Inhibitor	ribosomal small subunit biogenesis [GO:0042274]	3.711e-06	7	24	KRR1 LTV1 CMS1 BUD22 RPS19B RPS19A RRP36
30°C	srb2∆	Tye7	Decreased	Activator	Increased	Inhibitor	endonucleolytic cleavage to generate mature 5'-end of SSU-rRNA from (SSU-rRNA, 5.8S rRNA, LSU-rRNA) [GO:0000472]	1.478e-05	7	29	FCF1 UTP6 UTP11 FCF2 UTP14 UTP23 BUD21
30°C	srb2∆	Mga1	Decreased	Activator	Decreased	Activator	oxidation-reduction process [GO:0055114]	2.441e-07	18	272	ETR1 ARA1 HEM13 MXR1 ARI1 POX1 CTT1 GND2 GRE3 OYE2 TDH1 AHP1 IDP2 ERO1 FMS1 ALD4 IRC15 OYE3
30°C	srb2∆	Mga1	Decreased	Activator	Decreased	Activator	response to stress [GO:0006950]	7.673e-07	13	152	FRT2 HSP26 SSE2 HSP42 HSP31 HSP12 CTT1 WSC4 GRE3 MSN4 HSP104 ICT1 DDR48
30°C	srb2∆	Mss11	Decreased	Activator	Increased	Inhibitor	translation [GO:0006412]	<1e-14	40	318	RPL19B RPL32 RPL19A RPS6B RPS9B RPL31A RPL13A RPS17B RPL34A RPL24A RPL28 RPS25A RPS23A RPL24B RPS20 RPL27A RPL34B RPL15A RPL22A RPL10 RPS31 RPL38 RPS25B RPS1A RPS17A RPS1B RPL6A RPL13B TIF11 RPS7B RPS19B WRS1 RPS19A RPL25 CDC33 RPL21B RPS9A RPS6A SUI3 RPL36B
30°C	srb2∆	Mss11	Decreased	Activator	Increased	Inhibitor	maturation of SSU-rRNA from tricistronic rRNA transcript (SSU-rRNA, 5.8S rRNA, LSU-rRNA) [GO:0000462]	8.758e-07	9	60	RPS6B RPS9B UTP22 RPS23A RPS20 RPS1A RPS1B RPS9A RPS6A
30°C	srb2∆	Gat1	Decreased	Activator	Increased	Inhibitor	endonucleolytic cleavage to generate mature 5'-end of SSU-rRNA from (SSU-rRNA, 5.8S rRNA, LSU-rRNA) [GO:0000472]	<1e-14	26	29	UTP20 PWP2 NOP14 SAS10 UTP6 UTP7 DBP8 NOP9 UTP18 UTP10 MPP10 UTP11 FCF2 DIP2 EMG1 UTP13 UTP14 RRP5 ESF2 RCL1 UTP23 BUD21 PNO1 NOP58 MRD1 NOC4
30°C	srb2∆	Gat1	Decreased	Activator	Increased	Inhibitor	endonucleolytic cleavage in 5'-ETS of tricistronic rRNA transcript (SSU-rRNA, 5.8S rRNA, LSU-rRNA) [GO:0000480]	<1e-14	24	27	UTP20 PWP2 NOP14 SAS10 UTP6 UTP7 DBP8 NOP9 UTP18 UTP10 MPP10 UTP11 FCF2 DIP2 EMG1 UTP13 UTP14 RRP5 ESF2 RCL1 UTP23 NOP58 MRD1 NOC4
30°C	srb2∆	Gat1	Decreased	Activator	Increased	Inhibitor	endonucleolytic cleavage in ITS1 to separate SSU-rRNA from 5.8S rRNA and LSU-rRNA from tricistronic rRNA transcript (SSU-rRNA, 5.8S rRNA, LSU-rRNA) [GO:0000447]	<1e-14	34	40	UTP20 ENP1 KRR1 BUD23 PWP2 NOP14 SAS10 UTP6 UTP7 DBP8 NOP9 UTP18 UTP10 MPP10 UTP11 RPS21A RPS0B FCF2 DIP2 EMG1 UTP13 RPS18B UTP14 RRP5 KRI1 ESF2 RCL1 UTP23 BUD21 PNO1 RRS1 NOP58 MRD1 NOC4
30°C	srb2∆	Gat1	Decreased	Activator	Increased	Inhibitor	ribosomal small subunit biogenesis [GO:0042274]	<1e-14	19	24	KRR1 NOP14 NOP6 ENP2 UTP25 RRP14 LTV1 UTP30 CMS1 EMG1 SGD1 UTP21 BUD22 KRE33 RPS19B RPS19A RRP36 NEW1 NOC4
30°C	srb2∆	Gat1	Decreased	Activator	Increased	Inhibitor	ribosomal large subunit assembly [GO:0000027]	<1e-14	29	38	RSA4 DBP10 MAK21 RPL12B RPL12A DBP3 LSG1 SSF1 IPI1 RPF1 RIX1 SQT1 YVH1 MRT4 DBP7 RPF2 DRS1 RSA3 DBP9 RPP0 RPL6B RPL6A IPI3 DBP6 BRX1 REX4 RPL5 RSA1 NIP7
30°C	srb2∆	Gat1	Decreased	Activator	Increased	Inhibitor	ribosome biogenesis [GO:0042254]	<1e-14	128	170	UTP20 MAK5 RPS6B RPS9B ENP1 REI1 RRP7 SPB1 KRR1 PWP2 NOP1 DBP10 TSR1 NOP14 SAS10 NHP2 NOP6 FAL1 MAK21 UTP4 ESF1 UTP5 UTP6 SNU13 NOP16 NUG1 UTP7 LCP5 CGR1 DBP3 NSA1 ROK1 SLX9 UTP22 NOP7 UTP8 ENP2 SDA1 PXR1 CIC1 RRP3 SSF1 IPI1 RPF1 GAR1 IMP3 DBP8 UTP9 RIX1 FAF1 UTP25 RPL40A NOP9 HCA4 UTP18 UTP10 ALB1 RPS14B MPP10 MRT4 URB1 DHR2 RRP14 UTP11 EBP2 DBP7 UTP30 RPL40B DRS1 SOF1 RIX7 NOC3 RLP24 SDO1 RPS0B…
30°C	srb2∆	Gat1	Decreased	Activator	Increased	Inhibitor	maturation of SSU-rRNA from tricistronic rRNA transcript (SSU-rRNA, 5.8S rRNA, LSU-rRNA) [GO:0000462]	<1e-14	44	60	RPS6B RPS9B PWP2 RPS16B NOP14 SAS10 FAL1 RPS13 UTP4 UTP5 UTP6 SNU13 UTP7 SLX9 UTP22 NOP7 RPS23A UTP8 EFG1 RPS20 RPS27B RRP3 UTP9 FAF1 RPS24B UTP25 UTP10 RPS14B DHR2 SOF1 FYV7 DIP2 UTP13 TSR2 RPS1A RPS1B UTP15 ECM16 RPS16A RIO2 BUD21 RRP36 RRP12 NAN1
30°C	srb2∆	Gat1	Decreased	Activator	Increased	Inhibitor	ribosomal large subunit biogenesis [GO:0042273]	<1e-14	27	37	MAK16 MAK5 REI1 ARX1 PUF6 NOP16 NSA1 NOP7 TIF4631 SDA1 CIC1 ALB1 MRT4 RRP14 RIX7 RLP24 SDO1 ERB1 RLP7 NOP15 NOP8 YTM1 RRS1 NOG1 NIP7 TIF6 JIP5
30°C	srb2∆	Gat1	Decreased	Activator	Increased	Inhibitor	rRNA processing [GO:0006364]	<1e-14	125	195	UTP20 MAK5 RPS6B RPS9B ENP1 RRP7 SPB1 KRR1 PWP2 NOP1 DBP10 TSR1 NOP14 SAS10 NHP2 NOP6 SSB1 FAL1 RRP8 RRP45 BFR2 UTP4 ESF1 UTP5 UTP6 SNU13 NOP16 NUG1 UTP7 LCP5 CGR1 RPL30 DBP3 NSA1 ROK1 RAI1 SLX9 UTP22 NOP7 UTP8 ENP2 NSR1 EFG1 PXR1 ZUO1 RRP3 IPI1 RPF1 GAR1 IMP3 DBP8 UTP9 RIX1 UTP25 NOP9 HCA4 MTR4 UTP18 UTP10 RPS14B MPP10 MRT4 URB1 DHR2 RRP14 UTP11 EBP2 DBP7 RPS21A UTP30 DRS1 SOF1 NOC3 SDO1 RPS0B F…
30°C	srb2∆	Gat1	Decreased	Activator	Increased	Inhibitor	translation [GO:0006412]	<1e-14	93	318	MAK16 FUN12 RBG1 RPL32 TRM7 RPG1 RPL19A RPS6B RPS9B SRO9 RPL31A RPP1A RPL13A RPS16B RPL35B SSB1 RPL4B SES1 RPS13 GIR2 GCD6 YDR341C RPL12B RPS17B RPL12A RPL34A RPL30 RPL24A RPL7A RPL1B RPL9A RPL26B GCD2 RPS23A TIF4631 MES1 RPS20 RPL27A YHR020W RPS27B RPF1 RPS4B RPS24B RPL16A RPL40A RPL17B RPS22A RPS14B RPS4A GCN3 RPS21A RPL40B RLP24 RPL15A RPS0B FRS1 RPL22A RPS28B RPS25B RPP0 RPL31B RPS1A RPL6B RP…
30°C	srb2∆	Gat1	Decreased	Activator	Increased	Inhibitor	maturation of LSU-rRNA from tricistronic rRNA transcript (SSU-rRNA, 5.8S rRNA, LSU-rRNA) [GO:0000463]	4.94e-12	13	18	MAK16 MAK5 SPB1 RPL35B RAI1 RPF1 URB1 RPF2 RLP7 NOP12 NOP53 TIF6 RRP15
30°C	srb2∆	Gat1	Decreased	Activator	Increased	Inhibitor	methylation [GO:0032259]	4.017e-08	20	71	NCL1 HMT1 TRM7 SPB1 BUD23 NOP1 TRM3 TRM8 RRP8 TRM1 RMT2 MHT1 EMG1 ERG6 NOP2 TRM11 TRM13 PPM2 DIM1 SAM4
30°C	srb2∆	Gat1	Decreased	Activator	Increased	Inhibitor	maturation of 5.8S rRNA from tricistronic rRNA transcript (SSU-rRNA, 5.8S rRNA, LSU-rRNA) [GO:0000466]	5.336e-08	9	14	MAK16 MAK5 SPB1 RAI1 RPF1 URB1 RPF2 TIF6 RRP15
30°C	srb2∆	Gat1	Decreased	Activator	Increased	Inhibitor	tRNA transcription from RNA polymerase III promoter [GO:0042797]	1.252e-07	9	15	RPB5 RPC53 RPC25 RPC19 RET1 RPB8 RPC40 RPO26 RPC82
30°C	srb2∆	Gat1	Decreased	Activator	Increased	Inhibitor	tRNA methylation [GO:0030488]	1.303e-07	10	19	NCL1 TRM7 TRM3 TRM8 TRM1 TRM82 TRM112 TRM11 TRM13 PPM2
30°C	srb2∆	Gat1	Decreased	Activator	Increased	Inhibitor	ribosomal subunit export from nucleus [GO:0000054]	5.011e-07	8	13	SSB1 LSG1 ZUO1 RIX1 SDO1 NOC2 NOG1 TIF6
30°C	srb2∆	Gat1	Decreased	Activator	Increased	Inhibitor	ribosomal large subunit export from nucleus [GO:0000055]	1.25e-06	10	23	ECM1 BCP1 NUG1 SDA1 RPF1 NMD3 RIX7 NOG2 RRS1 NOP53
30°C	srb2∆	Gat1	Decreased	Activator	Increased	Inhibitor	translational initiation [GO:0006413]	4.16e-06	13	43	FUN12 RPG1 GCD6 GCD2 TIF4631 GCN3 NIP1 CDC33 GCD1 PRT1 SUI3 TIF6 TIF5
30°C	srb2∆	Gat1	Decreased	Activator	Increased	Inhibitor	RNA processing [GO:0006396]	4.308e-06	12	37	TRM3 RRP45 UTP6 RPL1B CIC1 UTP30 FYV7 CBF5 RRP5 RNT1 RCL1 RRP6
30°C	srb2∆	Gat1	Decreased	Activator	Increased	Inhibitor	positive regulation of transcription from RNA polymerase I promoter [GO:0045943]	4.501e-06	7	12	UTP4 UTP5 UTP8 UTP9 UTP10 UTP15 NAN1
30°C	srb2∆	Gat1	Decreased	Activator	Increased	Inhibitor	tRNA processing [GO:0008033]	6.867e-06	18	80	SEN34 NCL1 TRM7 NOP1 PUS9 TRM3 TRM8 TRM1 TRM82 TRL1 TRZ1 DUS3 DUS1 POP3 TRM11 TRM13 PPM2 PUS1
30°C	srb2∆	Gat1	Decreased	Activator	Increased	Inhibitor	purine nucleotide biosynthetic process [GO:0006164]	1.245e-05	8	18	ADE1 MIS1 ADE6 IMD2 MTD1 ADE17 GUA1 ADE4
30°C	srb2∆	Gat1	Decreased	Activator	Decreased	Activator	oxidation-reduction process [GO:0055114]	<1e-14	55	272	BDH2 GDH3 PRX1 UGA2 ETR1 RFS1 ADH5 ARA1 ADH7 NDE2 YDL124W PST2 HEM13 TSA2 MXR1 CTT1 COQ6 GND2 AIM17 PUT2 GRE3 TRR2 FMO1 GND1 DOT5 IRC24 TDH1 BNA2 YJR096W MET5 YJR149W MDH1 YKL107W FOX2 FMP46 CCP1 SDH2 XYL2 TSA1 CYB2 NDI1 ERO1 ARA2 ALD3 IDP3 YNL134C GOR1 AAD14 MDH2 GCY1 ALD4 IRC15 OYE3 YPR127W MET16
30°C	srb2∆	Gat1	Decreased	Activator	Decreased	Activator	metabolic process [GO:0008152]	2.721e-12	67	425	BDH2 GDH3 NTH2 UGA2 ETR1 YBR056W TKL2 ADH5 ADH7 GPM2 NTH1 GAL3 TPS2 APA2 YEF1 PHM8 AGX1 GSY1 BNA6 HXK1 PNC1 PYC1 AMS1 NQM1 LSC2 COQ6 GND2 BIO2 PUT2 DOG2 GND1 CRG1 SGA1 POT1 IRC24 TDH1 INO1 MET5 YJR149W UGP1 MDH1 YKL107W MCD4 SRY1 FOX2 XYL2 BNA5 GSY2 ECI1 MET17 YLR345W CYB2 YMR084W YMR090W ALD3 YMR196W SPO1 LEU4 YNL134C GOR1 MDH2 ALD4 PMA2 OYE3 ICL2 MET16 GDB1
30°C	srb2∆	Gat1	Decreased	Activator	Decreased	Activator	cellular response to oxidative stress [GO:0034599]	1.439e-07	18	67	PRX1 UGA2 YDL124W TSA2 GRX2 MXR1 GRE3 TRR2 GND1 DOT5 YJR096W MSN4 CCP1 TSA1 GAD1 ATX1 GCY1 OXR1
30°C	srb2∆	Gat1	Decreased	Activator	Decreased	Activator	mitochondrion degradation [GO:0000422]	9.111e-07	11	29	ATG8 ATG20 ATG9 CIS1 ATG32 YIL165C SNX4 ATG33 ATG16 ATG29 ATG13
30°C	srb2∆	Gat1	Decreased	Activator	Decreased	Activator	carbohydrate metabolic process [GO:0005975]	1.752e-06	20	94	YBR056W GLK1 GAL3 EMI2 GLC3 HXK1 PKP2 AMS1 NQM1 XKS1 SOL4 PKP1 SGA1 MDH1 XYL2 PGM2 MDH2 GAL4 GPH1 GDB1
30°C	srb2∆	Gat1	Decreased	Activator	Decreased	Activator	glycogen biosynthetic process [GO:0005978]	2.772e-06	7	12	GLC3 GSY1 UGP1 GLG1 GSY2 PGM2 GDB1
30°C	srb2∆	Gat1	Decreased	Activator	Decreased	Activator	cell redox homeostasis [GO:0045454]	1.551e-05	10	31	PRX1 PDI1 TSA2 GRX2 TRR2 DOT5 GRX8 TSA1 POR1 IRC15
30°C	srb2∆	Gat1	Decreased	Activator	Decreased	Activator	trehalose biosynthetic process [GO:0005992]	2.131e-05	5	7	TPS1 TPS2 UGP1 TSL1 PGM2
30°C	srb2∆	Ino2	Decreased	Activator	Increased	Inhibitor	regulation of translational fidelity [GO:0006450]	1.178e-05	4	10	RPL31A RPS23A SSZ1 RPS23B
30°C	srb2∆	Ino2	Decreased	Activator	Decreased	Activator	oxidation-reduction process [GO:0055114]	2.036e-05	18	272	UGA2 ADH7 AAD3 AAD4 DIT2 POX1 HTD2 FMO1 RNR3 GUT2 MDH1 YKL107W TSA1 AIM33 ERO1 GPD2 AAD15 DFR1
30°C	srb2∆	Gal4	Decreased	Activator	Increased	Inhibitor	translation [GO:0006412]	<1e-14	69	318	RPL19B RPL23A RPL32 RPL4A RPL19A RPL31A RPP1A RPL35B RPL35A SSB1 RPL4B RPS13 YDR341C RPS17B RPS18A RPL37B GCD11 RPS24A RPL23B RPL30 RPL24A RPL28 RPS26A RPS25A RPL26B RPS23A RPL24B TYS1 RPL14B RPL27A DED81 RPS27B SSZ1 RPL34B RPS24B RPL40A RPS21B RPS22A RPL43B RPL14A RPS21A RPL40B FRS1 RPL22A RPS31 RPL37A RPS28B RPL38 RPS25B RPP0 RPL31B RPS17A RPS18B TIF34 RPL20A TIF11 RPS3 RPS19B WRS1 RPS19A RPL25…
30°C	srb2∆	Gal4	Decreased	Activator	Increased	Inhibitor	rRNA processing [GO:0006364]	3.03e-13	28	195	KRR1 NOP1 NHP2 SSB1 FCF1 ESF1 NOP16 RPL30 PXR1 ZUO1 SSZ1 RPS21B UTP11 RPS21A UTP30 SDO1 FCF2 FYV7 TSR2 NOP15 KRI1 MPP6 REX4 BUD21 RRP36 NOP53 NIP7 TIF6
30°C	srb2∆	Gal4	Decreased	Activator	Increased	Inhibitor	ribosome biogenesis [GO:0042254]	3.702e-12	25	170	KRR1 NOP1 NHP2 FCF1 ESF1 NOP16 PXR1 FAF1 RPL40A ALB1 UTP11 UTP30 RPL40B SDO1 FCF2 RPS31 RSA3 RPP0 NOP15 KRI1 NOP8 BUD21 RRP36 NOP53 NIP7
30°C	srb2∆	Gal4	Decreased	Activator	Increased	Inhibitor	regulation of translational fidelity [GO:0006450]	7.742e-08	6	10	RPL31A SSB1 RPS23A ZUO1 SSZ1 RPL31B
30°C	srb2∆	Gal4	Decreased	Activator	Increased	Inhibitor	endonucleolytic cleavage in ITS1 to separate SSU-rRNA from 5.8S rRNA and LSU-rRNA from tricistronic rRNA transcript (SSU-rRNA, 5.8S rRNA, LSU-rRNA) [GO:0000447]	8.181e-08	10	40	KRR1 FCF1 RPS18A RPS21B UTP11 RPS21A FCF2 RPS18B KRI1 BUD21
30°C	srb2∆	Gal4	Decreased	Activator	Increased	Inhibitor	rRNA export from nucleus [GO:0006407]	4.051e-07	8	27	RPS18A RPS26A RPS28B RPS18B RPS3 RPS19B RPS19A RPS10A
30°C	srb2∆	Gal4	Decreased	Activator	Increased	Inhibitor	maturation of SSU-rRNA from tricistronic rRNA transcript (SSU-rRNA, 5.8S rRNA, LSU-rRNA) [GO:0000462]	4.509e-06	10	60	RPS13 RPS24A RPS23A RPS27B FAF1 RPS24B FYV7 TSR2 BUD21 RRP36
30°C	srb2∆	Gal4	Decreased	Activator	Decreased	Activator	oxidation-reduction process [GO:0055114]	9.801e-07	19	272	BDH1 ADH5 MXR1 ARI1 COQ6 AIM17 PUT2 GND1 RNR3 TDH1 SOR1 MDH1 NDI1 ERO1 ALD3 ALD2 YMR315W MDH2 GCY1
30°C	srb2∆	Gal4	Decreased	Activator	Decreased	Activator	trehalose biosynthetic process [GO:0005992]	4.509e-06	4	7	TPS1 TPS2 TSL1 PGM2
30°C	srb2∆	Gal4	Decreased	Activator	Decreased	Activator	metabolic process [GO:0008152]	1.831e-05	22	425	BDH1 NTH2 ADH5 GAL3 TPS2 ARI1 COQ6 PUT2 GND1 RNR3 TDH1 SOR1 MDH1 MET17 TAL1 ALD3 ALD2 YMR315W MDH2 SPR1 PMA2 THI6
30°C	srb2∆	Ino4	Decreased	Activator	Increased	Inhibitor	ribosome biogenesis [GO:0042254]	1.325e-11	17	170	NOP1 ESF1 UTP6 CGR1 SDA1 PXR1 CIC1 GAR1 RIX1 DHR2 DBP7 SOF1 RIX7 CBF5 RRP5 NOG2 NOC2
30°C	srb2∆	Ino4	Decreased	Activator	Increased	Inhibitor	rRNA processing [GO:0006364]	9.721e-09	15	195	NOP1 BFR2 ESF1 UTP6 CGR1 NSR1 PXR1 GAR1 RIX1 DHR2 DBP7 SOF1 CBF5 RRP5 RNT1
30°C	srb2∆	Ino4	Decreased	Activator	Decreased	Activator	phospholipid biosynthetic process [GO:0008654]	1.795e-05	7	37	INO2 SCS3 INO1 OPI3 URA8 ICT1 INO4
30°C	srb2∆	Msn1	Decreased	Activator	Increased	Inhibitor	translation [GO:0006412]	<1e-14	20	318	RPL23A RPS14A RPP1A RPP1B RPL35B RPS13 RPP2B RPL23B RPL27A RPS27B RPL40A RPS22A RPL43B RPL14A RPS21A RPL22A RPL37A RPS28B TIF34 RPS10A
30°C	srb2∆	Msn1	Decreased	Activator	Increased	Inhibitor	maturation of SSU-rRNA from tricistronic rRNA transcript (SSU-rRNA, 5.8S rRNA, LSU-rRNA) [GO:0000462]	1.775e-06	6	60	RPS14A RPS13 SNU13 UTP22 RPS27B FYV7
30°C	srb2∆	Msn1	Decreased	Activator	Decreased	Activator	response to stress [GO:0006950]	1.663e-05	6	152	TPS1 HSP12 CTT1 GRE3 ICT1 DDR48
30°C	srb2∆	Gcr1	Decreased	Activator	Increased	Inhibitor	translation [GO:0006412]	<1e-14	132	318	MAK16 RBG1 RPL19B RPS8A RPL23A RPL32 RPL4A RPS11B RPL19A RPS6B RPS9B RPS14A RPL31A RPP1A RPL13A RPS16B RPP1B RPL35B RPL35A SSB1 RPL4B RPS11A RPS13 GCD6 YDR341C RPP2B RPL12B RPS17B RPS18A RPL37B HYP2 RPL12A GCD11 RPL34A RPS24A RPS8B RPL23B RPL2A RPL30 RPL24A RPL7A RPL28 RPS2 RPL1B RPL9A RPS26A RPS25A RPL26B RPS23A RPL24B TYS1 RPS0A MES1 RPL14B RPS20 RPL27A DED81 YHR020W RPS27B SSZ1 RPS4B RPL2B RPL…
30°C	srb2∆	Gcr1	Decreased	Activator	Increased	Inhibitor	maturation of SSU-rRNA from tricistronic rRNA transcript (SSU-rRNA, 5.8S rRNA, LSU-rRNA) [GO:0000462]	<1e-14	23	60	RPS8A RPS11B RPS6B RPS9B RPS14A RPS16B RPS11A RPS13 SNU13 RPS24A RPS8B RPS23A RPS20 RPS27B RPS24B RPS14B RPS1A RPS1B RPS16A BUD21 RPS9A RPS6A RPS23B
30°C	srb2∆	Gcr1	Decreased	Activator	Increased	Inhibitor	ribosome biogenesis [GO:0042254]	<1e-14	38	170	RPS6B RPS9B SPB1 RPS14A NOP1 ESF1 SNU13 RPS2 RPS0A PXR1 GAR1 IMP3 RPL40A UTP18 RPS14B MRT4 RPL40B RIX7 RPL8B RPS0B RPS31 CBF5 EMG1 NOP56 RPP0 RRB1 RRP5 RPS7B NOG2 RCL1 RPS15 NOP12 BRX1 BUD21 RPS7A RPS9A RPS6A DIM1
30°C	srb2∆	Gcr1	Decreased	Activator	Increased	Inhibitor	rRNA processing [GO:0006364]	<1e-14	39	195	RPS6B RPS9B SPB1 RPS14A NOP1 SSB1 BFR2 ESF1 SNU13 RPL30 RPS2 NSR1 SKI6 RPS0A PXR1 ZUO1 SSZ1 GAR1 IMP3 UTP18 RPS21B RPS14B MRT4 RPS21A RPS0B CBF5 EMG1 PWP1 NOP56 RRB1 RRP5 RPS7B NOP12 BUD21 RPS7A RPS9A RPS6A RVB2 DIM1
30°C	srb2∆	Gcr1	Decreased	Activator	Increased	Inhibitor	ribosomal small subunit assembly [GO:0000028]	4.281e-13	11	14	RPS11B RPS14A RPS11A RPS17B NSR1 RPS0A RPS27B RPS14B RPS0B RPS31 RPS17A
30°C	srb2∆	Gcr1	Decreased	Activator	Increased	Inhibitor	rRNA export from nucleus [GO:0006407]	1.271e-12	14	27	RPS18A RPS2 RPS26A RPS0A RPS5 RPS0B RPS28B RPS18B RNA1 RPS3 RPS19B RPS15 RPS19A RPS10A
30°C	srb2∆	Gcr1	Decreased	Activator	Increased	Inhibitor	regulation of translational fidelity [GO:0006450]	6.532e-10	8	10	RPL31A SSB1 RPS23A ZUO1 SSZ1 RPS5 RPL31B RPS23B
30°C	srb2∆	Gcr1	Decreased	Activator	Increased	Inhibitor	ribosomal large subunit assembly [GO:0000027]	4.865e-09	13	38	RPL12B RPL12A SQT1 MRT4 RPL10 RPP0 RPL6B RPL6A BRX1 RPL25 RPL3 RPL5 RPL11A
30°C	srb2∆	Gcr1	Decreased	Activator	Increased	Inhibitor	ergosterol biosynthetic process [GO:0006696]	2.048e-08	10	23	ERG28 ERG26 ERG4 ERG25 ERG11 ERG3 ERG6 ERG13 ERG5 ERG2
30°C	srb2∆	Gcr1	Decreased	Activator	Increased	Inhibitor	steroid biosynthetic process [GO:0006694]	5.398e-08	10	25	ERG28 ERG26 ERG4 ERG25 ERG11 ERG3 ERG6 ERG13 ERG5 ERG2
30°C	srb2∆	Gcr1	Decreased	Activator	Increased	Inhibitor	sterol biosynthetic process [GO:0016126]	2.815e-07	10	29	ERG28 ERG26 ERG4 ERG25 ERG11 ERG3 ERG6 ERG13 ERG5 ERG2
30°C	srb2∆	Gcr1	Decreased	Activator	Increased	Inhibitor	endonucleolytic cleavage in ITS1 to separate SSU-rRNA from 5.8S rRNA and LSU-rRNA from tricistronic rRNA transcript (SSU-rRNA, 5.8S rRNA, LSU-rRNA) [GO:0000447]	9.418e-07	11	40	RPS18A RPS0A UTP18 RPS21B RPS21A RPS0B EMG1 RPS18B RRP5 RCL1 BUD21
30°C	srb2∆	Gcr1	Decreased	Activator	Increased	Inhibitor	endonucleolytic cleavage to generate mature 3'-end of SSU-rRNA from (SSU-rRNA, 5.8S rRNA, LSU-rRNA) [GO:0000461]	4.069e-06	4	4	RPS0A RPS21B RPS21A RPS0B
30°C	srb2∆	Gcr1	Decreased	Activator	Decreased	Activator	oxidation-reduction process [GO:0055114]	4.846e-12	35	272	BDH1 PRX1 UGA2 RFS1 ADH5 YDL124W DIT2 TSA2 ARI1 CTT1 COQ6 GND2 AIM17 OYE2 GUT2 TDH1 BNA1 BNA2 YJR149W MDH1 SDH1 MCR1 SDH2 AHP1 IDP2 TSA1 CYB2 NDI1 FMS1 ALD3 ALD2 GOR1 MDH2 ALD4 IRC15
30°C	srb2∆	Gcr1	Decreased	Activator	Decreased	Activator	tricarboxylic acid cycle [GO:0006099]	2.857e-08	10	30	SDH4 LSC2 MDH1 SDH3 SDH1 SDH2 IDP2 CIT1 MDH2 CIT3
30°C	srb2∆	Gcr1	Decreased	Activator	Decreased	Activator	metabolic process [GO:0008152]	8.142e-08	37	425	BDH1 NTH2 UGA2 TKL2 ADH5 GPM2 URH1 YEF1 PHM8 GSY1 HXK1 PNC1 PYC1 AMS1 ARI1 NQM1 LSC2 COQ6 GND2 BIO2 OYE2 TDH1 BNA1 YJR149W MDH1 PDC5 BNA5 FBP1 CYB2 YMR090W ALD3 ALD2 YMR196W GOR1 MDH2 SPR1 ALD4
30°C	srb2∆	Gcr1	Decreased	Activator	Decreased	Activator	carbohydrate metabolic process [GO:0005975]	8.385e-08	16	94	GLK1 GLC3 PMI40 HXK1 PCL10 AMS1 NQM1 SOL4 PCL7 MDH1 FBP1 YMR085W PGM2 MDH2 SPR1 GAL4
30°C	srb2∆	Gcr1	Decreased	Activator	Decreased	Activator	mitochondrial electron transport, succinate to ubiquinone [GO:0006121]	6.393e-06	4	5	SDH4 SDH3 SDH1 SDH2
30°C	srb2∆	Gcr1	Decreased	Activator	Decreased	Activator	ATP synthesis coupled proton transport [GO:0015986]	1.323e-05	6	17	ATP1 ATP17 ATP2 ATP7 ATP19 ATP15
30°C	srb2∆	Gcr1	Decreased	Activator	Decreased	Activator	response to unfolded protein [GO:0006986]	1.717e-05	5	11	HAC1 ULI1 KAR2 LHS1 ORM2
30°C	srb2∆	Yox1	Decreased	Activator	Increased	Inhibitor	cell cycle [GO:0007049]	1.711e-08	20	316	MCM2 MCM7 KCC4 MCD1 ALK1 CDC20 MCM6 DBF2 AIM20 CDC6 BUD4 RAX2 MCM5 TEM1 CDC5 HOF1 SUN4 EGT2 IQG1 CLB2
30°C	srb2∆	Yox1	Decreased	Activator	Increased	Inhibitor	iron ion homeostasis [GO:0055072]	1.469e-06	6	26	SIT1 ARN1 FRE1 FRE4 ENB1 FIT2
30°C	srb2∆	Yox1	Decreased	Activator	Increased	Inhibitor	pre-replicative complex assembly [GO:0006267]	2.251e-06	5	16	MCM2 MCM7 MCM6 CDC6 MCM5
30°C	srb2∆	Yox1	Decreased	Activator	Increased	Inhibitor	siderophore transport [GO:0015891]	2.81e-06	4	8	SIT1 ARN1 FRE4 FIT2
30°C	srb2∆	Yox1	Decreased	Activator	Increased	Inhibitor	cell division [GO:0051301]	3.06e-06	13	190	KCC4 MCD1 CDC20 CDC6 BUD4 RAX2 TEM1 CDC5 HOF1 SUN4 EGT2 IQG1 CLB2
30°C	srb2∆	Yox1	Decreased	Activator	Increased	Inhibitor	S phase of mitotic cell cycle [GO:0000084]	1.281e-05	4	11	MCM2 MCM7 MCM6 MCM5
30°C	srb2∆	Yox1	Decreased	Activator	Decreased	Activator	response to stress [GO:0006950]	6.144e-06	14	152	HSP26 SSE2 FMP45 HSP42 HSP31 SSA4 HSP12 PAU5 CTT1 RTA1 WSC4 MSN4 ICT1 GRE1
30°C	srb2∆	Gln3	Decreased	Activator	Increased	Inhibitor	maturation of SSU-rRNA from tricistronic rRNA transcript (SSU-rRNA, 5.8S rRNA, LSU-rRNA) [GO:0000462]	<1e-14	28	60	RPS11B RPS9B PWP2 RPS16B FAL1 RPS13 UTP6 SNU13 RPS24A UTP8 RPS20 RPS27B UTP9 FAF1 UTP10 RPS14B DHR2 SOF1 FYV7 DIP2 UTP13 RPS1B UTP15 RPS16A BUD21 RRP36 RPS9A RPS6A
30°C	srb2∆	Gln3	Decreased	Activator	Increased	Inhibitor	ribosome biogenesis [GO:0042254]	<1e-14	67	170	RPS9B RRP7 SPB1 PWP2 NOP1 FAL1 ESF1 UTP6 SNU13 DBP3 RPS2 UTP8 ENP2 RPS0A PXR1 CIC1 SSF1 IPI1 GAR1 DBP8 UTP9 FAF1 RPL40A HCA4 UTP18 UTP10 ALB1 RPS14B MRT4 URB1 DHR2 EBP2 DBP7 RPL40B SOF1 RIX7 NOC3 SDO1 RPS0B FCF2 DIP2 RPS31 NOP56 UTP13 RPP0 UTP21 UTP14 UTP15 HAS1 NOP15 NAF1 NOG2 ESF2 RCL1 RPS15 NOP12 BRX1 BUD21 RPS7A RRP36 NOP4 RPS9A RPS6A NOG1 NOP53 NIP7 RRP9
30°C	srb2∆	Gln3	Decreased	Activator	Increased	Inhibitor	rRNA processing [GO:0006364]	<1e-14	60	195	RPS9B RRP7 SPB1 PWP2 NOP1 SSB1 FAL1 ESF1 UTP6 SNU13 DBP3 RPS2 UTP8 ENP2 RPS0A PXR1 ZUO1 IPI1 GAR1 DBP8 UTP9 HCA4 UTP18 UTP10 RPS21B RPS14B MRT4 URB1 DHR2 EBP2 DBP7 SOF1 NOC3 SDO1 RPS0B FCF2 FYV7 DIP2 NOP56 UTP13 UTP21 UTP14 UTP15 HAS1 NOP15 NAF1 SSU72 POP3 ESF2 NOP12 BUD21 RPS7A RRP36 NOP4 RPS9A RPS6A NOG1 NOP53 NIP7 RRP9
30°C	srb2∆	Gln3	Decreased	Activator	Increased	Inhibitor	translation [GO:0006412]	<1e-14	88	318	RPL19B RPL32 RPL4A RPS11B RPS9B RPL31A RPS16B RPP1B RPL35A SSB1 RPL4B RPS13 GIR2 YDR341C RPL12B RPL37B RPL12A RPL34A RPS24A RPL2A RPL24A RPL7A RPL28 RPS2 RPL9A RPS26A YGR054W RPL24B TYS1 RPS0A RPS20 RPL27A DED81 YHR020W RPS27B RPS4B RPL2B RPL34B RPL16A RPL40A RPS21B RPL17B RPS22A RPS14B RPL43B RPS5 RPS4A RPL14A RPL17A RPL40B RPL15A RPS0B RPL22A RPS31 RPL37A RPS28B RPL38 RPP0 RPL31B RPL6B RPS17A R…
30°C	srb2∆	Gln3	Decreased	Activator	Increased	Inhibitor	ribosomal large subunit assembly [GO:0000027]	9.026e-14	18	38	RPL12B RPL12A DBP3 LSG1 SSF1 IPI1 MRT4 DBP7 RPF2 RPP0 RPL6B RPL6A BRX1 RPL25 RPL3 RPL5 NIP7 RPL11A
30°C	srb2∆	Gln3	Decreased	Activator	Increased	Inhibitor	endonucleolytic cleavage in ITS1 to separate SSU-rRNA from 5.8S rRNA and LSU-rRNA from tricistronic rRNA transcript (SSU-rRNA, 5.8S rRNA, LSU-rRNA) [GO:0000447]	5.669e-11	16	40	PWP2 UTP6 RPS0A DBP8 UTP18 UTP10 RPS21B RPS0B FCF2 DIP2 UTP13 RPS18B UTP14 ESF2 RCL1 BUD21
30°C	srb2∆	Gln3	Decreased	Activator	Increased	Inhibitor	endonucleolytic cleavage to generate mature 5'-end of SSU-rRNA from (SSU-rRNA, 5.8S rRNA, LSU-rRNA) [GO:0000472]	9.662e-09	12	29	PWP2 UTP6 DBP8 UTP18 UTP10 FCF2 DIP2 UTP13 UTP14 ESF2 RCL1 BUD21
30°C	srb2∆	Gln3	Decreased	Activator	Increased	Inhibitor	endonucleolytic cleavage in 5'-ETS of tricistronic rRNA transcript (SSU-rRNA, 5.8S rRNA, LSU-rRNA) [GO:0000480]	4.958e-08	11	27	PWP2 UTP6 DBP8 UTP18 UTP10 FCF2 DIP2 UTP13 UTP14 ESF2 RCL1
30°C	srb2∆	Gln3	Decreased	Activator	Increased	Inhibitor	rRNA export from nucleus [GO:0006407]	4.958e-08	11	27	RPS2 RPS26A RPS0A RPS5 RPS0B RPS28B RPS18B RPS3 RPS19B RPS15 RPS10A
30°C	srb2∆	Gln3	Decreased	Activator	Increased	Inhibitor	ribosomal small subunit assembly [GO:0000028]	1.336e-07	8	14	RPS11B RRP7 RPS0A RPS27B RPS14B RPS0B RPS31 RPS17A
30°C	srb2∆	Gln3	Decreased	Activator	Increased	Inhibitor	'de novo' IMP biosynthetic process [GO:0006189]	1.586e-06	6	9	ADE1 ADE8 ADE6 ADE13 ADE17 ADE4
30°C	srb2∆	Gln3	Decreased	Activator	Increased	Inhibitor	purine nucleotide biosynthetic process [GO:0006164]	1.612e-06	8	18	ADE1 ADE8 ADE6 IMD2 MTD1 ADE13 ADE17 ADE4
30°C	srb2∆	Gln3	Decreased	Activator	Increased	Inhibitor	cellular amino acid biosynthetic process [GO:0008652]	3.066e-06	18	98	HIS7 ARO4 ILV6 THR4 LYS20 LYS4 TRP4 IRC7 BAT2 MHT1 YML082W ADI1 ILV2 LYS9 LEU9 SAM4 ARO7 ASN1
30°C	srb2∆	Gln3	Decreased	Activator	Increased	Inhibitor	ribosomal large subunit biogenesis [GO:0042273]	1.52e-05	10	37	ARX1 PUF6 CIC1 ALB1 MRT4 RIX7 SDO1 NOP15 NOG1 NIP7
30°C	srb2∆	Gln3	Decreased	Activator	Decreased	Activator	oxidation-reduction process [GO:0055114]	3.939e-07	32	272	GDH3 PRX1 UGA2 ADH5 ADH7 NDE2 YDL114W AAD4 PST2 HEM13 DIT2 TSA2 GND2 AIM17 PUT2 TRR2 RNR3 BNA1 BNA2 JHD2 MET5 AAD10 MDH1 AHP1 IDP2 AIM33 IDP3 MDH2 AAD15 IRC15 OYE3 MET16
30°C	srb2∆	Gln3	Decreased	Activator	Decreased	Activator	metabolic process [GO:0008152]	1.157e-05	39	425	GDH3 UGA2 ADH5 ADH7 GPM2 YDL114W ENA2 AGX1 BNA6 HXK1 PYC1 GND2 BIO2 PUT2 DOG2 DOG1 ATG7 CRG1 RNR3 SGA1 POT1 INO1 IMA5 BNA1 MET5 MDH1 MCD4 SRY1 BNA5 MET17 TAL1 FBP1 YMR084W SPO1 LEU4 MDH2 PMA2 OYE3 MET16
30°C	srb2∆	Gln3	Decreased	Activator	Decreased	Activator	de novo NAD biosynthetic process from tryptophan [GO:0034354]	1.91e-05	4	5	BNA6 BNA1 BNA2 BNA5
30°C	srb2∆	Gsm1	Decreased	Activator	Increased	Inhibitor	translation [GO:0006412]	1.21e-14	17	318	RPS14A RPP1B RPS13 RPP2B GCD11 RPL2A RPL30 RPL26B RPL14B RPS27B RPL16A RPL43B RPL14A RPS28B RPL16B RPL18A RPL1A
30°C	srb2∆	Hac1	Decreased	Activator	Increased	Inhibitor	metabolic process [GO:0008152]	1.879e-05	20	425	ILV6 APA1 CHA1 LYS20 LYS4 URA3 RNR1 SER3 ARD1 FUR1 DCD1 ACO2 BAT2 CAR2 ERG13 PLB2 ADE17 LYS9 DSE4 GDH1
30°C	srb2∆	Hac1	Decreased	Activator	Decreased	Activator	oxidation-reduction process [GO:0055114]	7.247e-09	42	272	BDH1 BDH2 GDH3 PRX1 ADH5 NDE2 YDL114W YDL124W SFA1 HEM13 TSA2 ARI1 CTT1 COQ6 AIM17 HTD2 GRE3 TRR2 FMO1 OYE2 COX5B TDH1 BNA1 BNA2 MET5 YJR149W MDH1 YKL107W FOX2 SDH2 AHP1 IDP2 TSA1 CYB2 ERO1 ALD3 YMR315W YNL134C GCY1 DFR1 IRC15 MET16
30°C	srb2∆	Hac1	Decreased	Activator	Decreased	Activator	metabolic process [GO:0008152]	7.983e-09	56	425	BDH1 BDH2 GDH3 ADH5 GPM2 YDL114W SFA1 GAL3 YDR018C ENA5 URH1 PHM8 AGX1 GSY1 BNA6 HXK1 PNC1 PYC1 AMS1 ARI1 LSC2 COQ6 BIO2 DOG2 DOG1 ATG7 OYE2 CRG1 SGA1 POT1 TDH1 INO1 IMA5 BNA1 MET5 YJR149W MDH1 YKL107W MCD4 SRY1 FOX2 PDC5 BNA5 ECI1 MET17 CYB2 YMR084W YMR090W ALD3 YMR315W SPO1 LEU4 YNL134C PMA2 ICL2 MET16
30°C	srb2∆	Hac1	Decreased	Activator	Decreased	Activator	thiamine biosynthetic process [GO:0009228]	2.261e-06	8	17	THI13 THI5 SNO3 THI4 RPI1 THI12 THI20 THI21
30°C	srb2∆	Hac1	Decreased	Activator	Decreased	Activator	cell redox homeostasis [GO:0045454]	7.296e-06	10	31	PRX1 PDI1 TSA2 EUG1 TRR2 AHP1 GRX8 TSA1 MPD1 IRC15
30°C	srb2∆	Rme1	Decreased	Activator	Increased	Inhibitor	iron ion homeostasis [GO:0055072]	1.558e-07	6	26	SIT1 FTR1 ARN1 FET4 FRE4 ENB1
30°C	srb2∆	Rme1	Decreased	Activator	Decreased	Activator	oxidation-reduction process [GO:0055114]	1.087e-08	23	272	BDH1 ADH7 YDL124W SFA1 DIT2 POX1 CTT1 OYE2 RNR3 HYR1 YJR096W FOX2 SDH2 XYL2 CYB2 AIM33 FMS1 YMR315W YNL134C GOR1 CYC2 ALD4 OYE3
30°C	srb2∆	Rme1	Decreased	Activator	Decreased	Activator	metabolic process [GO:0008152]	5.754e-08	28	425	BDH1 TKL2 ADH7 GPM2 SFA1 GAL3 ENA2 URH1 YEF1 AGX1 POX1 OYE2 RNR3 SGA1 INO1 SRY1 FOX2 XYL2 PDC5 ECI1 FBP1 CYB2 YMR315W YNL134C GOR1 ALD4 PMA2 OYE3
30°C	srb2∆	Eds1	Decreased	Activator	Increased	Inhibitor	'de novo' IMP biosynthetic process [GO:0006189]	5.629e-08	4	9	ADE1 ADE6 ADE17 ADE4
30°C	srb2∆	Eds1	Decreased	Activator	Increased	Inhibitor	purine nucleotide biosynthetic process [GO:0006164]	1.326e-06	4	18	ADE1 ADE6 ADE17 ADE4
30°C	srb2∆	Eds1	Decreased	Activator	Increased	Inhibitor	lysine biosynthetic process via aminoadipic acid [GO:0019878]	5.697e-06	3	8	LYS20 LYS4 LYS9
30°C	srb2∆	Eds1	Decreased	Activator	Increased	Inhibitor	lysine biosynthetic process [GO:0009085]	5.697e-06	3	8	LYS20 LYS4 LYS9
30°C	srb2∆	Eds1	Decreased	Activator	Increased	Inhibitor	metabolic process [GO:0008152]	1.96e-05	10	425	LYS20 LYS4 CEM1 ACO2 BAT2 MAE1 ADE17 ADE4 LYS9 GDH1
30°C	srb2∆	Eds1	Decreased	Activator	Increased	Inhibitor	mitochondrial citrate transport [GO:0006843]	2.276e-05	2	2	CTP1 YHM2
30°C	srb2∆	Zap1	Decreased	Activator	Increased	Inhibitor	rRNA processing [GO:0006364]	6.082e-06	10	195	DBP3 RRP3 IMP3 EBP2 DBP7 FYV7 RRP5 IPI3 MPP6 NOP4
30°C	srb2∆	Zap1	Decreased	Activator	Increased	Inhibitor	ribosome biogenesis [GO:0042254]	1.448e-05	9	170	DBP3 RRP3 IMP3 EBP2 DBP7 RRP5 IPI3 RRP12 NOP4
30°C	srb2∆	Zap1	Decreased	Activator	Increased	Inhibitor	ribosomal large subunit assembly [GO:0000027]	1.765e-05	5	38	DBP3 SQT1 DBP7 RPF2 IPI3
30°C	srb2∆	Zap1	Decreased	Activator	Decreased	Activator	oxidation-reduction process [GO:0055114]	7.244e-08	19	272	BDH1 PRX1 ETR1 ADH5 YDL124W HEM13 POX1 CTT1 GND2 FMO1 TDH1 BNA1 MET5 XYL2 TSA1 ERO1 ALD3 ALD2 YMR315W
30°C	srb2∆	Zap1	Decreased	Activator	Decreased	Activator	metabolic process [GO:0008152]	2.882e-07	23	425	BDH1 ETR1 TKL2 ADH5 URH1 AGX1 PYC1 AMS1 POX1 GND2 TDH1 INO1 BNA1 MET5 MCD4 XYL2 BNA5 GSY2 ALD3 ALD2 YMR315W LEU4 PMA2
30°C	srb2∆	Msn4	Decreased	Activator	Increased	Inhibitor	endonucleolytic cleavage in 5'-ETS of tricistronic rRNA transcript (SSU-rRNA, 5.8S rRNA, LSU-rRNA) [GO:0000480]	<1e-14	18	27	UTP20 PWP2 NOP14 SAS10 UTP6 UTP18 UTP10 UTP11 DIP2 UTP13 UTP14 RRP5 ESF2 RCL1 UTP23 NOP58 MRD1 NOC4
30°C	srb2∆	Msn4	Decreased	Activator	Increased	Inhibitor	endonucleolytic cleavage to generate mature 5'-end of SSU-rRNA from (SSU-rRNA, 5.8S rRNA, LSU-rRNA) [GO:0000472]	<1e-14	19	29	UTP20 PWP2 NOP14 SAS10 UTP6 UTP18 UTP10 UTP11 DIP2 UTP13 UTP14 RRP5 ESF2 RCL1 UTP23 PNO1 NOP58 MRD1 NOC4
30°C	srb2∆	Msn4	Decreased	Activator	Increased	Inhibitor	endonucleolytic cleavage in ITS1 to separate SSU-rRNA from 5.8S rRNA and LSU-rRNA from tricistronic rRNA transcript (SSU-rRNA, 5.8S rRNA, LSU-rRNA) [GO:0000447]	<1e-14	24	40	UTP20 ENP1 KRR1 PWP2 NOP14 SAS10 UTP6 UTP18 UTP10 UTP11 DIP2 UTP13 RPS18B UTP14 RRP5 KRI1 ESF2 RCL1 UTP23 PNO1 RRS1 NOP58 MRD1 NOC4
30°C	srb2∆	Msn4	Decreased	Activator	Increased	Inhibitor	ribosome biogenesis [GO:0042254]	<1e-14	83	170	UTP20 ENP1 KRR1 PWP2 NOP1 TSR1 NOP14 SAS10 NHP2 NOP6 MAK21 UTP4 ESF1 UTP6 LCP5 DBP3 NSA1 ROK1 UTP22 NOP7 UTP8 ENP2 SDA1 PXR1 CIC1 SSF1 IPI1 IMP3 RIX1 FAF1 UTP25 HCA4 UTP18 UTP10 ALB1 MRT4 DHR2 RRP14 UTP11 EBP2 DRS1 SOF1 RIX7 NOC3 RLP24 DIP2 CBF5 NOP56 RSA3 UTP13 DBP9 RPP0 UTP21 UTP14 ERB1 ECM16 RRB1 RRP5 RLP7 NOP2 IMP4 NOP15 IPI3 KRI1 NOG2 ESF2 RCL1 NOP12 BRX1 UTP23 PNO1 NOC2 RRP36 RRS1 NOP58 RRP…
30°C	srb2∆	Msn4	Decreased	Activator	Increased	Inhibitor	ribosomal large subunit biogenesis [GO:0042273]	<1e-14	18	37	MAK16 ARX1 PUF6 NSA1 NOP7 SDA1 CIC1 ALB1 MRT4 RRP14 RIX7 RLP24 ERB1 RLP7 NOP15 RRS1 NOG1 NIP7
30°C	srb2∆	Msn4	Decreased	Activator	Increased	Inhibitor	ribosomal large subunit assembly [GO:0000027]	<1e-14	17	38	RSA4 MAK21 DBP3 SSF1 IPI1 RIX1 MRT4 RPF2 DRS1 RSA3 DBP9 RPP0 IPI3 BRX1 REX4 RPL25 NIP7
30°C	srb2∆	Msn4	Decreased	Activator	Increased	Inhibitor	maturation of SSU-rRNA from tricistronic rRNA transcript (SSU-rRNA, 5.8S rRNA, LSU-rRNA) [GO:0000462]	<1e-14	26	60	RPS11B PWP2 RPS16B NOP14 SAS10 RPS11A UTP4 UTP6 UTP22 NOP7 UTP8 EFG1 FAF1 UTP25 UTP10 DHR2 SOF1 FYV7 DIP2 UTP13 TSR2 ECM16 RRP36 RRP12 RPS9A NAN1
30°C	srb2∆	Msn4	Decreased	Activator	Increased	Inhibitor	rRNA processing [GO:0006364]	<1e-14	75	195	UTP20 ENP1 KRR1 PWP2 NOP1 TSR1 NOP14 SAS10 NHP2 NOP6 RRP8 BFR2 UTP4 ESF1 UTP6 LCP5 DBP3 NSA1 ROK1 UTP22 NOP7 UTP8 ENP2 NSR1 EFG1 PXR1 IPI1 IMP3 RIX1 UTP25 HCA4 MTR4 UTP18 UTP10 MRT4 DHR2 RRP14 UTP11 EBP2 DRS1 SOF1 NOC3 FYV7 DIP2 CBF5 PWP1 NOP56 UTP13 DBP9 UTP21 TSR2 UTP14 ERB1 ECM16 RRB1 RRP5 NOP2 IMP4 NOP15 IPI3 KRI1 ESF2 NOP12 REX4 UTP23 RRP36 NOP58 NOP4 RPS9A NOG1 NAN1 NIP7 MRD1 RRP9 NOC4
30°C	srb2∆	Msn4	Decreased	Activator	Increased	Inhibitor	ribosomal small subunit biogenesis [GO:0042274]	1.833e-11	12	24	KRR1 NOP14 NOP6 ENP2 UTP25 RRP14 LTV1 UTP21 BUD22 KRE33 RRP36 NOC4
30°C	srb2∆	Msn4	Decreased	Activator	Decreased	Activator	oxidation-reduction process [GO:0055114]	<1e-14	60	272	BDH1 BDH2 GDH3 PRX1 UGA2 RFS1 ARA1 NDE2 YDL114W YDL124W PST2 TSA2 MXR1 ARI1 POX1 CTT1 COQ6 GND2 AIM17 GRE3 OYE2 DOT5 RNR3 COX5B GUT2 IRC24 BNA2 YJR096W JHD2 MET5 YJR149W SOR1 GPX1 MDH1 YKL107W MCR1 FOX2 FMP46 CCP1 SDH2 XYL2 AHP1 IDP2 TSA1 CYB2 AIM33 NDI1 ERO1 FMS1 ALD3 ALD2 YMR315W IDP3 YNL134C GOR1 MDH2 GCY1 ALD4 IRC15 OYE3
30°C	srb2∆	Msn4	Decreased	Activator	Decreased	Activator	metabolic process [GO:0008152]	3.123e-10	62	425	BDH1 BDH2 GDH3 UGA2 YBR056W TKL2 GPM2 YDL114W NTH1 GAL3 YDR018C TPS2 PHM8 AGX1 SNZ3 GSY1 HXK1 PNC1 PYC1 AMS1 ARI1 POX1 NQM1 LSC2 COQ6 GND2 DOG2 OYE2 CRG1 RNR3 SGA1 POT1 IRC24 INO1 IMA5 MET5 YJR149W SOR1 UGP1 MDH1 YKL107W MCD4 FOX2 XYL2 GSY2 ECI1 YLR345W CYB2 YMR084W YMR090W ALD3 ALD2 YMR196W YMR315W YNL134C GOR1 SNZ2 MDH2 SPR1 ALD4 OYE3 GDB1
30°C	srb2∆	Msn4	Decreased	Activator	Decreased	Activator	cellular response to oxidative stress [GO:0034599]	4.427e-10	21	67	PRX1 UGA2 TRX3 YDL124W TSA2 GRX2 MXR1 HSP12 GRE3 DOT5 YJR096W GPX1 MSN4 MCR1 CCP1 AHP1 TSA1 GAD1 NCE103 ATX1 GCY1
30°C	srb2∆	Msn4	Decreased	Activator	Decreased	Activator	thiamine biosynthetic process [GO:0009228]	1.359e-08	10	17	THI13 THI5 SNZ3 THI4 RPI1 THI11 THI12 SNZ2 THI20 THI21
30°C	srb2∆	Msn4	Decreased	Activator	Decreased	Activator	glycogen biosynthetic process [GO:0005978]	1.048e-07	8	12	GLC3 GSY1 UGP1 GLG1 GSY2 PGM2 GAC1 GDB1
30°C	srb2∆	Msn4	Decreased	Activator	Decreased	Activator	response to stress [GO:0006950]	2.747e-07	28	152	HSP26 TPS1 SSE2 MRK1 FMP45 NTH1 TPS2 HSP42 HSP78 HSP31 SSA4 HSP12 DAK2 CTT1 WSC4 GRE3 FMC1 XBP1 KAR2 DAN4 MSN4 HSP104 UBI4 DAK1 TSL1 RIM11 DDR48 GRE1
30°C	srb2∆	Msn4	Decreased	Activator	Decreased	Activator	carbohydrate metabolic process [GO:0005975]	3.212e-07	21	94	YBR056W GLK1 GAL3 YDR248C EMI2 GLC3 HXK1 AMS1 NQM1 XKS1 SOL4 SGA1 IMA5 MDH1 XYL2 YMR085W PGM2 MDH2 SPR1 GPH1 GDB1
30°C	srb2∆	Msn4	Decreased	Activator	Decreased	Activator	cellular carbohydrate metabolic process [GO:0044262]	3.865e-06	8	17	TPS1 ARA1 AMS1 MDH1 CIT1 MDH2 GLO4 CIT3
30°C	srb2∆	Msn4	Decreased	Activator	Decreased	Activator	biological_process [GO:0008150]	5.094e-06	113	1203	FUN19 BDH2 YAR028W YBL029C-A MOH1 EDS1 RFS1 YBR053C YRO2 YBR056W YBR085C-A YBR137W RTC2 ICS2 OM14 YBR284W YBR285W GPM2 UBX3 TMA17 YDL114W UGX2 RTN2 YDL206W PST2 FMP16 PHM6 YDR391C YDR476C SPG3 HSP31 YEL023C UTR5 YEL073C HVG1 YER079W AIM11 YER121W FMP10 IGD1 YGL117W ARI1 MTC3 YGL230C NQM1 YGR066C YGR127W HUA1 AIM17 YHR033W YPT35 YHR140W CRG1 AIM19 YIL108W OM45 NIT1 YIR016W IRC24 MPM1 PRY1 IML2 SNA…
30°C	srb2∆	Msn4	Decreased	Activator	Decreased	Activator	tricarboxylic acid cycle [GO:0006099]	9.837e-06	10	30	LSC2 MDH1 SDH3 SDH2 IDP2 IDP3 MLS1 CIT1 MDH2 CIT3
30°C	srb2∆	Msn4	Decreased	Activator	Decreased	Activator	fatty acid beta-oxidation [GO:0006635]	1.124e-05	6	10	POX1 POT1 TES1 FOX2 ECI1 IDP3
30°C	srb2∆	Msn4	Decreased	Activator	Decreased	Activator	cell redox homeostasis [GO:0045454]	1.37e-05	10	31	PRX1 TRX3 TSA2 GRX2 EUG1 DOT5 AHP1 TSA1 MPD1 IRC15
30°C	srb2∆	Msn4	Decreased	Activator	Decreased	Activator	trehalose biosynthetic process [GO:0005992]	1.988e-05	5	7	TPS1 TPS2 UGP1 TSL1 PGM2
30°C	srb2∆	Adr1	Decreased	Activator	Increased	Inhibitor	ribosome biogenesis [GO:0042254]	<1e-14	20	170	REI1 SPB1 KRR1 PWP2 UTP6 DBP3 ENP2 SDA1 CIC1 SSF1 ALB1 DBP7 SOF1 RLP24 RPS31 UTP13 RRP5 NAF1 IPI3 NOP4
30°C	srb2∆	Adr1	Decreased	Activator	Increased	Inhibitor	rRNA processing [GO:0006364]	1.646e-09	16	195	SPB1 KRR1 PWP2 RRP8 UTP6 DBP3 RAI1 ENP2 DBP7 SOF1 UTP13 RRP5 NAF1 IPI3 SSU72 NOP4
30°C	srb2∆	Adr1	Decreased	Activator	Increased	Inhibitor	ribosomal large subunit biogenesis [GO:0042273]	5.596e-06	6	37	REI1 ARX1 SDA1 CIC1 ALB1 RLP24
30°C	srb2∆	Adr1	Decreased	Activator	Decreased	Activator	fatty acid beta-oxidation [GO:0006635]	2.96e-09	6	10	POX1 POT1 TES1 FOX2 ECI1 IDP3
30°C	srb2∆	Adr1	Decreased	Activator	Decreased	Activator	tricarboxylic acid cycle [GO:0006099]	3.383e-07	7	30	SDH1 IDP2 IDP3 MLS1 MDH2 LSC1 CIT3
30°C	srb2∆	Adr1	Decreased	Activator	Decreased	Activator	metabolic process [GO:0008152]	7.092e-07	22	425	ETR1 TKL2 APA2 YEF1 PYC1 POX1 NQM1 GND2 POT1 FOX2 PDC5 ECI1 FBP1 CYB2 YMR090W SPO1 GPD2 MDH2 LSC1 ALD4 PMA2 ICL2
30°C	srb2∆	Rpi1	Decreased	Activator	Decreased	Activator	glycogen biosynthetic process [GO:0005978]	1.166e-06	4	12	GLC3 GSY1 GSY2 PGM2
30°C	srb2∆	Rpi1	Decreased	Activator	Decreased	Activator	trehalose biosynthetic process [GO:0005992]	1.237e-05	3	7	TPS2 TSL1 PGM2
30°C	srb2∆	Xbp1	Decreased	Activator	Increased	Inhibitor	cell cycle [GO:0007049]	8.816e-11	30	316	ALK2 SHE1 BUD3 KCC4 BIK1 CDC10 MCD1 CYK3 ALK1 SRM1 DBF2 RSR1 AIM20 NET1 SAP185 SWE1 BUD4 RAX2 CDC45 MCM5 TEM1 CDC5 HOF1 PDS5 SUN4 EGT2 RAX1 IPL1 CLB2 DPB2
30°C	srb2∆	Xbp1	Decreased	Activator	Increased	Inhibitor	cell division [GO:0051301]	2.96e-08	20	190	SHE1 KCC4 BIK1 CDC10 MCD1 CYK3 SRM1 RSR1 NET1 SWE1 BUD4 RAX2 TEM1 CDC5 HOF1 PDS5 SUN4 EGT2 RAX1 CLB2
30°C	srb2∆	Xbp1	Decreased	Activator	Increased	Inhibitor	sterol biosynthetic process [GO:0016126]	3.058e-07	8	29	ERG26 ERG4 ERG25 ERG11 ERG3 ECM22 ERG6 ERG5
30°C	srb2∆	Xbp1	Decreased	Activator	Increased	Inhibitor	ergosterol biosynthetic process [GO:0006696]	8.28e-07	7	23	ERG26 ERG4 ERG25 ERG11 ERG3 ERG6 ERG5
30°C	srb2∆	Xbp1	Decreased	Activator	Increased	Inhibitor	steroid biosynthetic process [GO:0006694]	1.558e-06	7	25	ERG26 ERG4 ERG25 ERG11 ERG3 ERG6 ERG5
30°C	srb2∆	Xbp1	Decreased	Activator	Increased	Inhibitor	mitosis [GO:0007067]	3.641e-06	14	132	ALK2 SHE1 BIK1 MCD1 ALK1 SRM1 NET1 SWE1 TEM1 CDC5 HOF1 PDS5 EGT2 CLB2
30°C	srb2∆	Xbp1	Decreased	Activator	Increased	Inhibitor	lipid biosynthetic process [GO:0008610]	3.841e-06	9	52	CEM1 ERG26 ERG4 ERG25 ERG11 ELO1 ERG3 ERG6 ERG5
30°C	srb2∆	Xbp1	Decreased	Activator	Decreased	Activator	oxidation-reduction process [GO:0055114]	2.023e-10	36	272	GDH3 UGA2 RFS1 NDE2 DIT2 TSA2 ARI1 POX1 CTT1 AIM17 HTD2 GRE3 OYE2 DOT5 RNR3 COX5B TDH1 BNA2 YJR096W MDH1 SDH1 FOX2 FMP46 IDP2 CYB2 AIM33 ERO1 FMS1 YNL134C GOR1 CYC2 GCY1 DFR1 ALD4 IRC15 OYE3
30°C	srb2∆	Xbp1	Decreased	Activator	Decreased	Activator	metabolic process [GO:0008152]	5.256e-09	44	425	GDH3 UGA2 GPM2 ENA5 ENA2 AGX1 SNZ3 BNA6 PYC1 ARI1 POX1 LSC2 BIO2 DOG2 DOG1 OYE2 CRG1 RNR3 SGA1 POT1 TDH1 INO1 UGP1 MDH1 MCD4 SRY1 FOX2 PDC5 BNA5 GSY2 ECI1 TAL1 FBP1 CYB2 YMR084W LEU4 YNL134C GOR1 SNZ2 LSC1 ALD4 PMA2 OYE3 GDB1
30°C	srb2∆	Xbp1	Decreased	Activator	Decreased	Activator	thiamine biosynthetic process [GO:0009228]	1.209e-07	8	17	THI13 THI5 SNZ3 SNO3 THI4 THI11 THI12 SNZ2
30°C	srb2∆	Xbp1	Decreased	Activator	Decreased	Activator	tricarboxylic acid cycle [GO:0006099]	1.556e-07	10	30	SDH4 LSC2 MDH1 SDH3 SDH1 IDP2 MLS1 CIT1 LSC1 CIT3
30°C	srb2∆	Sut1	Increased	Inhibitor	Increased	Activator	ribosome biogenesis [GO:0042254]	<1e-14	48	170	ENP1 LCP5 CIC1 SSF1 IPI1 RPF1 GAR1 IMP3 DBP8 FAF1 UTP25 HCA4 ALB1 DHR2 RRP14 EBP2 DBP7 DRS1 RIX7 NOC3 RLP24 DIP2 UTP13 DBP9 UTP21 UTP14 ERB1 UTP15 ECM16 RRB1 HAS1 RLP7 NOP2 IMP4 IPI3 KRI1 NOG2 ESF2 RPS15 NOP12 BRX1 NOC2 RRS1 RRP12 NOG1 NAN1 NIP7 BMS1
30°C	srb2∆	Sut1	Increased	Inhibitor	Increased	Activator	rRNA processing [GO:0006364]	<1e-14	41	195	ENP1 LCP5 IPI1 RPF1 GAR1 IMP3 DBP8 UTP25 HCA4 MTR4 DHR2 RRP14 EBP2 DBP7 DRS1 NOC3 DIP2 PWP1 UTP13 DBP9 UTP21 TSR2 UTP14 ERB1 UTP15 ECM16 RRB1 RNT1 HAS1 NOP2 IMP4 IPI3 KRI1 ESF2 NOP12 REX4 NOG1 NAN1 NIP7 BMS1 MRD1
30°C	srb2∆	Sut1	Increased	Inhibitor	Increased	Activator	ribosomal large subunit assembly [GO:0000027]	2.756e-13	13	38	SSF1 IPI1 RPF1 SQT1 YVH1 DBP7 RPF2 DRS1 DBP9 IPI3 BRX1 REX4 NIP7
30°C	srb2∆	Sut1	Increased	Inhibitor	Increased	Activator	ribosomal large subunit biogenesis [GO:0042273]	2.469e-09	10	37	CIC1 ALB1 RRP14 RIX7 RLP24 ERB1 RLP7 RRS1 NOG1 NIP7
30°C	srb2∆	Sut1	Increased	Inhibitor	Increased	Activator	endonucleolytic cleavage in ITS1 to separate SSU-rRNA from 5.8S rRNA and LSU-rRNA from tricistronic rRNA transcript (SSU-rRNA, 5.8S rRNA, LSU-rRNA) [GO:0000447]	9.243e-08	9	40	ENP1 DBP8 DIP2 UTP13 UTP14 KRI1 ESF2 RRS1 MRD1
30°C	srb2∆	Sut1	Increased	Inhibitor	Increased	Activator	maturation of SSU-rRNA from tricistronic rRNA transcript (SSU-rRNA, 5.8S rRNA, LSU-rRNA) [GO:0000462]	3.55e-07	10	60	FAF1 UTP25 DHR2 DIP2 UTP13 TSR2 UTP15 ECM16 RRP12 NAN1
30°C	srb2∆	Sut1	Increased	Inhibitor	Increased	Activator	ribosome assembly [GO:0042255]	8.935e-06	3	3	NOC2 NIP7 BMS1
30°C	srb2∆	Sut1	Increased	Inhibitor	Increased	Activator	endonucleolytic cleavage in 5'-ETS of tricistronic rRNA transcript (SSU-rRNA, 5.8S rRNA, LSU-rRNA) [GO:0000480]	1.541e-05	6	27	DBP8 DIP2 UTP13 UTP14 ESF2 MRD1
30°C	srb2∆	Sut1	Increased	Inhibitor	Increased	Activator	transcription of nuclear rRNA large RNA polymerase I transcript [GO:0042790]	1.875e-05	5	17	RRN7 RRN3 RRN11 RPA43 RPA135
30°C	srb2∆	Sut1	Increased	Inhibitor	Increased	Activator	endonucleolytic cleavage to generate mature 5'-end of SSU-rRNA from (SSU-rRNA, 5.8S rRNA, LSU-rRNA) [GO:0000472]	2.39e-05	6	29	DBP8 DIP2 UTP13 UTP14 ESF2 MRD1
30°C	srb2∆	Sut1	Increased	Inhibitor	Decreased	Inhibitor	oxidation-reduction process [GO:0055114]	5.353e-09	26	272	BDH1 PRX1 ARA1 YDL124W SFA1 HEM13 ARI1 POX1 AIM17 PUT2 GRE3 DOT5 RNR3 COX5B GUT2 JHD2 GPX1 MDH1 SDH2 AIM33 NDI1 ARA2 YMR315W YNL134C GOR1 GCY1
30°C	srb2∆	Sut1	Increased	Inhibitor	Decreased	Inhibitor	proton transport [GO:0015992]	7.913e-06	8	41	ATP17 ATP2 ATP7 MDM38 ATP19 SIA1 PMA2 ATP15
30°C	srb2∆	Sut1	Increased	Inhibitor	Decreased	Inhibitor	trehalose biosynthetic process [GO:0005992]	1.431e-05	4	7	TPS2 UGP1 TSL1 PGM2
30°C	srb2∆	Fyv5	Increased	Inhibitor	Decreased	Inhibitor	autophagy [GO:0006914]	1.883e-09	4	45	ATG8 ATG14 ATG9 ATG32
30°C	srb2∆	Fyv5	Increased	Inhibitor	Decreased	Inhibitor	mitochondrion degradation [GO:0000422]	3.039e-07	3	29	ATG8 ATG9 ATG32
30°C	srb2∆	Fyv5	Increased	Inhibitor	Decreased	Inhibitor	piecemeal microautophagy of nucleus [GO:0034727]	4.535e-07	3	33	ATG8 ATG14 ATG9
30°C	srb2∆	Fyv5	Increased	Inhibitor	Decreased	Inhibitor	CVT pathway [GO:0032258]	6.455e-07	3	37	ATG8 ATG14 ATG9
30°C	srb2∆	Fyv5	Increased	Inhibitor	Decreased	Inhibitor	autophagic vacuole assembly [GO:0000045]	1.813e-05	2	12	ATG8 ATG9
30°C	srb2∆	Fkh1	Increased	Inhibitor	Increased	Activator	maturation of SSU-rRNA from tricistronic rRNA transcript (SSU-rRNA, 5.8S rRNA, LSU-rRNA) [GO:0000462]	<1e-14	26	60	RPS8A RPS11B RPS6B RPS9B RPS14A RPS16B FAP7 RPS11A RPS13 UTP4 UTP6 SNU13 RPS24A RPS8B RPS23A RPS20 RPS27B UTP9 RPS24B RPS14B RPS1A RPS1B RPS16A RPS9A RPS6A RPS23B
30°C	srb2∆	Fkh1	Increased	Inhibitor	Increased	Activator	ribosomal large subunit assembly [GO:0000027]	<1e-14	16	38	RPL12B RPL12A DBP3 MRT4 RPL10 RSA3 DBP9 RPP0 RPL6B RPL6A DBP6 BRX1 RPL25 RPL5 NIP7 RPL11A
30°C	srb2∆	Fkh1	Increased	Inhibitor	Increased	Activator	translation [GO:0006412]	<1e-14	109	318	RPL19B RPS8A RPL23A RPL32 RPL4A RPS11B RPS6B RPS9B RPS14A RPL31A RPP1A RPL13A RPS16B RPP1B RPL35B RPL35A SSB1 RPL4B RPS11A RPS13 RPP2B RPL12B RPS17B RPS18A RPL37B RPL12A RPS24A RPS8B RPL23B RPL30 RPL24A RPL7A RPL28 RPS2 RPL1B RPL9A RPS26A RPS25A RPL26B RPS23A RPL24B RPS0A RPL14B RPS20 RPL27A RPS27B RPS4B RPL2B RPL34B RPS24B RPL16A RPL40A RPS21B RPL17B RPS22A RPS14B RPS5 RPS4A RPL14A RPL17A RPS21A…
30°C	srb2∆	Fkh1	Increased	Inhibitor	Increased	Activator	ribosome biogenesis [GO:0042254]	<1e-14	42	170	RPS6B RPS9B RPS14A FAP7 NHP2 UTP4 UTP6 SNU13 CGR1 DBP3 RPS2 RPS0A GAR1 UTP9 RPL40A ALB1 RPS14B MRT4 EBP2 RPL40B RPL8B RLP24 RPS31 NOP56 RSA3 DBP9 RPP0 RRB1 HAS1 RLP7 RPS7B DBP6 NOG2 ESF2 RPS15 BRX1 RPS7A NOC2 NOP58 RPS9A RPS6A NIP7
30°C	srb2∆	Fkh1	Increased	Inhibitor	Increased	Activator	rRNA processing [GO:0006364]	<1e-14	36	195	RPS6B RPS9B RPS14A FAP7 NHP2 SSB1 RRP8 UTP4 UTP6 SNU13 CGR1 RPL30 DBP3 RPS2 NSR1 RPS0A GAR1 UTP9 RPS21B RPS14B MRT4 EBP2 RPS21A NOP56 DBP9 RRB1 HAS1 RPS7B SSU72 DBP6 ESF2 RPS7A NOP58 RPS9A RPS6A NIP7
30°C	srb2∆	Fkh1	Increased	Inhibitor	Increased	Activator	ribosomal small subunit assembly [GO:0000028]	6.001e-13	10	14	RPS11B RPS14A RPS11A RPS17B NSR1 RPS0A RPS27B RPS14B RPS31 RPS17A
30°C	srb2∆	Fkh1	Increased	Inhibitor	Increased	Activator	rRNA export from nucleus [GO:0006407]	6.718e-12	12	27	RPS18A RPS2 RPS26A RPS0A RPS5 RPS28B RPS18B RPS3 RPS19B RPS15 RPS19A RPS10A
30°C	srb2∆	Fkh1	Increased	Inhibitor	Increased	Activator	regulation of translational fidelity [GO:0006450]	1.577e-07	6	10	RPL31A SSB1 RPS23A RPS5 RPL31B RPS23B
30°C	srb2∆	Fkh1	Increased	Inhibitor	Decreased	Inhibitor	oxidation-reduction process [GO:0055114]	9.523e-11	26	272	PRX1 RFS1 ADH5 ARA1 YDL124W CTT1 COQ6 AIM17 GRE3 HYR1 TDH1 BNA1 MET5 MCR1 AHP1 CYB2 NDI1 YMR315W YNL134C GOR1 GPD2 MDH2 CYC2 GCY1 DFR1 MET16
30°C	srb2∆	Fkh1	Increased	Inhibitor	Decreased	Inhibitor	glycogen biosynthetic process [GO:0005978]	7.714e-08	6	12	GLC3 GSY1 UGP1 GSY2 PGM2 GDB1
30°C	srb2∆	Fkh1	Increased	Inhibitor	Decreased	Inhibitor	trehalose biosynthetic process [GO:0005992]	9.013e-08	5	7	TPS1 TPS2 UGP1 TSL1 PGM2
30°C	srb2∆	Fkh1	Increased	Inhibitor	Decreased	Inhibitor	methionine biosynthetic process [GO:0009086]	2.06e-07	8	31	MET6 STR3 MET3 MET5 MET14 MET17 MET2 MET16
30°C	srb2∆	Fkh1	Increased	Inhibitor	Decreased	Inhibitor	metabolic process [GO:0008152]	1.053e-06	26	425	ADH5 TPS2 PHM8 GSY1 HXK1 PNC1 PYC1 AMS1 COQ6 CRG1 TDH1 BNA1 MET5 UGP1 SRY1 GSY2 MET17 YLR345W CYB2 YMR315W YNL134C GOR1 GPD2 MDH2 MET16 GDB1
30°C	srb2∆	Fkh1	Increased	Inhibitor	Decreased	Inhibitor	cellular response to oxidative stress [GO:0034599]	1.431e-06	10	67	PRX1 YDL124W HSP12 GRE3 HYR1 MCR1 AHP1 GAD1 NCE103 GCY1
30°C	srb2∆	Fkh1	Increased	Inhibitor	Decreased	Inhibitor	cysteine biosynthetic process [GO:0019344]	3.114e-06	5	12	MET3 MET5 MET14 MET17 MET16
30°C	srb2∆	Fkh1	Increased	Inhibitor	Decreased	Inhibitor	response to stress [GO:0006950]	4.438e-06	14	152	HSP26 TPS1 TPS2 HSP42 HSP78 HSP31 HSP12 CTT1 WSC4 GRE3 HSP104 UBI4 TSL1 DDR48
30°C	srb2∆	Fkh1	Increased	Inhibitor	Decreased	Inhibitor	cellular carbohydrate metabolic process [GO:0044262]	2.229e-05	5	17	TPS1 ARA1 AMS1 MDH2 CIT3
30°C	srb2∆	Fkh1	Increased	Inhibitor	Decreased	Inhibitor	glycolysis [GO:0006096]	2.362e-05	6	28	GLK1 EMI2 HXK1 ENO1 TDH1 PYK2
30°C	srb2∆	Kar4	Increased	Inhibitor	Increased	Activator	translation [GO:0006412]	1.92e-08	22	318	MAK16 RPL4A RPL31A RPP1A RPL35B RPL35A RPL24A RPS26A RPS23A RPL24B RPL27A RPS27B RPS21B RPL43B RPS21A RPL22A RPL37A RPP0 TIF11 RPL25 RPL3 RPS10A
30°C	srb2∆	Kar4	Increased	Inhibitor	Increased	Activator	ribosome biogenesis [GO:0042254]	1.996e-07	15	170	SPB1 NOP1 ESF1 PXR1 FAF1 HCA4 URB1 DBP7 FCF2 RPP0 NOP15 RCL1 NOP8 NOP4 NOP53
30°C	srb2∆	Kar4	Increased	Inhibitor	Increased	Activator	rRNA processing [GO:0006364]	2.076e-07	16	195	SPB1 NOP1 RRP8 ESF1 NSR1 PXR1 ZUO1 HCA4 RPS21B URB1 DBP7 RPS21A FCF2 NOP15 NOP4 NOP53
30°C	srb2∆	Kar4	Increased	Inhibitor	Increased	Activator	maturation of LSU-rRNA from tricistronic rRNA transcript (SSU-rRNA, 5.8S rRNA, LSU-rRNA) [GO:0000463]	3.833e-07	6	18	MAK16 SPB1 RPL35B RPL35A URB1 NOP53
30°C	srb2∆	Kar4	Increased	Inhibitor	Increased	Activator	'de novo' IMP biosynthetic process [GO:0006189]	1.029e-05	4	9	ADE1 ADE17 ADE4 ADE2
30°C	srb2∆	Kar4	Increased	Inhibitor	Decreased	Inhibitor	response to stress [GO:0006950]	1.605e-08	17	152	FRT2 SSE2 FMP45 AAD4 HSP42 HSP78 SSA4 HSP12 RTA1 WSC4 XBP1 HSP104 UBI4 ICT1 PDR8 RIM11 RSB1
30°C	srb2∆	Tup1	Increased	Inhibitor	Increased	Activator	ribosomal large subunit assembly [GO:0000027]	<1e-14	21	38	RSA4 MAK21 RPL12B RPL12A DBP3 LSG1 RIX1 SQT1 YVH1 MRT4 MAK11 DBP7 RPF2 DRS1 RPL10 RPP0 RPL6B RPL6A BRX1 RPL3 RPL11A
30°C	srb2∆	Tup1	Increased	Inhibitor	Increased	Activator	maturation of SSU-rRNA from tricistronic rRNA transcript (SSU-rRNA, 5.8S rRNA, LSU-rRNA) [GO:0000462]	<1e-14	25	60	RPS8A RPS6B RPS14A NOP14 UTP5 UTP6 SNU13 SLX9 UTP22 NOP7 RPS23A UTP8 UTP9 FAF1 UTP25 RPS14B DHR2 SOF1 DIP2 UTP13 RPS1A RPS1B UTP15 RPS9A RPS6A
30°C	srb2∆	Tup1	Increased	Inhibitor	Increased	Activator	ribosome biogenesis [GO:0042254]	<1e-14	70	170	MAK5 RPS6B ENP1 REI1 RRP7 SPB1 RPS14A NOP1 NOP14 MAK21 FCF1 UTP5 UTP6 SNU13 NUG1 LCP5 CGR1 DBP3 NSA1 RPS2 ROK1 SLX9 UTP22 NOP7 UTP8 ENP2 RPS0A GAR1 DBP8 UTP9 RIX1 FAF1 UTP25 NOP9 HCA4 UTP18 ALB1 RPS14B MRT4 MAK11 DHR2 UTP11 DBP7 DRS1 SOF1 RPL8B NOC3 SDO1 RPS0B FCF2 DIP2 CBF5 EMG1 NOP56 UTP13 RPP0 ERB1 UTP15 RRB1 RLP7 RPS7B NOP15 RCL1 RPS15 NOP12 BRX1 NOP58 NOP4 RPS9A RPS6A
30°C	srb2∆	Tup1	Increased	Inhibitor	Increased	Activator	rRNA processing [GO:0006364]	<1e-14	75	195	MAK5 RPS6B ENP1 RRP7 SPB1 RPS14A RRP43 NOP1 NOP14 RRP45 BFR2 FCF1 UTP5 UTP6 SNU13 NUG1 LCP5 CGR1 RPL30 DBP3 NSA1 RPS2 ROK1 SLX9 UTP22 NOP7 UTP8 ENP2 MTR3 NSR1 SKI6 RPS0A ZUO1 SSZ1 GAR1 DBP8 UTP9 RIX1 UTP25 NOP9 HCA4 UTP18 RPS14B MRT4 DHR2 UTP11 DBP7 RPS21A DRS1 SOF1 NOC3 SDO1 RPS0B FCF2 DIP2 CBF5 EMG1 PWP1 NOP56 UTP13 ERB1 UTP15 RRB1 RNT1 RPS7B NOP15 DIS3 NOP12 RRP6 NOP58 NOP4 RPS9A RPS6A RVB2 TI…
30°C	srb2∆	Tup1	Increased	Inhibitor	Increased	Activator	translation [GO:0006412]	<1e-14	95	318	MAK16 RBG1 RPL19B RPS8A RPL32 TRM7 RPG1 RPL19A RPS6B SRO9 RPS14A RPP1A RPL13A RPL4B SES1 GIR2 SUP35 YDR341C RPP2B RPL12B RPS18A HYP2 RPL12A GCD11 RPL34A RPL2A RPL30 RPL24A RPL28 RPS2 RPL1B RPL9A RPL26B YGR054W VAS1 RPS23A RPL24B TIF4631 TYS1 RPS0A MES1 RPL14B RPL27A DED81 YHR020W SSZ1 RPS4B RPL2B RPL34B RPL16A RPL17B RPS14B RPS5 RPS4A RPL17A GCN3 RPS21A RPL8B RPL15A RPS0B FRS1 RPL10 RPL37A RPS28B…
30°C	srb2∆	Tup1	Increased	Inhibitor	Increased	Activator	endonucleolytic cleavage in ITS1 to separate SSU-rRNA from 5.8S rRNA and LSU-rRNA from tricistronic rRNA transcript (SSU-rRNA, 5.8S rRNA, LSU-rRNA) [GO:0000447]	5.553e-12	18	40	ENP1 NOP14 FCF1 UTP6 RPS18A RPS0A DBP8 NOP9 UTP18 UTP11 RPS21A RPS0B FCF2 DIP2 EMG1 UTP13 RCL1 NOP58
30°C	srb2∆	Tup1	Increased	Inhibitor	Increased	Activator	endonucleolytic cleavage in 5'-ETS of tricistronic rRNA transcript (SSU-rRNA, 5.8S rRNA, LSU-rRNA) [GO:0000480]	1.882e-09	13	27	NOP14 FCF1 UTP6 DBP8 NOP9 UTP18 UTP11 FCF2 DIP2 EMG1 UTP13 RCL1 NOP58
30°C	srb2∆	Tup1	Increased	Inhibitor	Increased	Activator	ribosomal large subunit biogenesis [GO:0042273]	2.049e-09	15	37	MAK16 MAK5 REI1 NSA1 NOP7 TIF4631 ALB1 MRT4 MAK11 SDO1 AFG2 ERB1 RLP7 NOP15 TIF6
30°C	srb2∆	Tup1	Increased	Inhibitor	Increased	Activator	endonucleolytic cleavage to generate mature 5'-end of SSU-rRNA from (SSU-rRNA, 5.8S rRNA, LSU-rRNA) [GO:0000472]	5.664e-09	13	29	NOP14 FCF1 UTP6 DBP8 NOP9 UTP18 UTP11 FCF2 DIP2 EMG1 UTP13 RCL1 NOP58
30°C	srb2∆	Tup1	Increased	Inhibitor	Increased	Activator	purine nucleotide biosynthetic process [GO:0006164]	2.514e-08	10	18	ADE1 MIS1 ADE8 ADE6 IMD2 MTD1 ADE13 ADE17 GUA1 ADE4
30°C	srb2∆	Tup1	Increased	Inhibitor	Increased	Activator	rRNA export from nucleus [GO:0006407]	2.901e-07	11	27	RPS18A SRM1 RPS2 RPS0A RPS5 RPS0B RPS28B RNA1 RPS19B RPS15 RPS19A
30°C	srb2∆	Tup1	Increased	Inhibitor	Increased	Activator	ergosterol biosynthetic process [GO:0006696]	4.93e-07	10	23	ERG26 ERG25 ERG11 ERG7 ERG3 ERG6 HMG1 ERG13 ERG12 ERG8
30°C	srb2∆	Tup1	Increased	Inhibitor	Increased	Activator	steroid biosynthetic process [GO:0006694]	1.256e-06	10	25	ERG26 ERG25 ERG11 ERG7 ERG3 ERG6 HMG1 ERG13 ERG12 ERG8
30°C	srb2∆	Tup1	Increased	Inhibitor	Increased	Activator	methylation [GO:0032259]	1.272e-06	17	71	NCL1 TRM7 SPB1 KAR4 NOP1 TRM8 TRM1 ADE8 EFM1 HPM1 EMG1 ERG6 TRM11 TRM13 PPM2 CDC21 SAM4
30°C	srb2∆	Tup1	Increased	Inhibitor	Increased	Activator	'de novo' IMP biosynthetic process [GO:0006189]	4.37e-06	6	9	ADE1 ADE8 ADE6 ADE13 ADE17 ADE4
30°C	srb2∆	Tup1	Increased	Inhibitor	Increased	Activator	ribosomal subunit export from nucleus [GO:0000054]	4.691e-06	7	13	SRM1 LSG1 ZUO1 RIX1 SDO1 RNA1 TIF6
30°C	srb2∆	Tup1	Increased	Inhibitor	Increased	Activator	maturation of LSU-rRNA from tricistronic rRNA transcript (SSU-rRNA, 5.8S rRNA, LSU-rRNA) [GO:0000463]	5.904e-06	8	18	MAK16 MAK5 SPB1 MAK11 RPF2 RLP7 NOP12 TIF6
30°C	srb2∆	Tup1	Increased	Inhibitor	Increased	Activator	translational initiation [GO:0006413]	8.757e-06	12	43	RPG1 GCD11 YGR054W TIF4631 GCN3 TIF34 NIP1 GCD1 PRT1 SUI3 TIF6 TIF5
30°C	srb2∆	Tup1	Increased	Inhibitor	Increased	Activator	nuclear polyadenylation-dependent mRNA catabolic process [GO:0071042]	8.874e-06	7	14	RRP43 RRP45 MTR3 SKI6 DIS3 PAP2 RRP6
30°C	srb2∆	Tup1	Increased	Inhibitor	Increased	Activator	ribosomal small subunit assembly [GO:0000028]	8.874e-06	7	14	RRP7 RPS14A NSR1 RPS0A RPS14B RPS0B RPS17A
30°C	srb2∆	Tup1	Increased	Inhibitor	Increased	Activator	tRNA methylation [GO:0030488]	9.639e-06	8	19	NCL1 TRM7 TRM8 TRM1 TRM112 TRM11 TRM13 PPM2
30°C	srb2∆	Tup1	Increased	Inhibitor	Increased	Activator	U1 snRNA 3'-end processing [GO:0034473]	1.569e-05	4	4	RRP45 SKI6 RNT1 RRP6
30°C	srb2∆	Tup1	Increased	Inhibitor	Increased	Activator	polyadenylation-dependent snoRNA 3'-end processing [GO:0071051]	1.574e-05	7	15	RRP43 RRP45 MTR3 SKI6 DIS3 PAP2 RRP6
30°C	srb2∆	Tup1	Increased	Inhibitor	Increased	Activator	U4 snRNA 3'-end processing [GO:0034475]	2.155e-05	6	11	RRP45 MTR3 SKI6 RNT1 PAP2 RRP6
30°C	srb2∆	Tup1	Increased	Inhibitor	Decreased	Inhibitor	oxidation-reduction process [GO:0055114]	5.99e-10	37	272	BDH2 PRX1 UGA2 RFS1 ADH5 ARA1 NDE2 PST2 HEM13 DIT2 MXR1 GND2 PUT2 HTD2 OYE2 GND1 RNR3 GUT2 TDH1 MET5 YJR149W SOR1 GPX1 YKL071W AHP1 IDP2 NDI1 ERO1 ALD3 YNL134C GOR1 MDH2 FRE7 AAD15 CYC2 ALD4 OYE3
30°C	srb2∆	Tup1	Increased	Inhibitor	Decreased	Inhibitor	metabolic process [GO:0008152]	5.521e-07	42	425	BDH2 UGA2 YBR056W ADH5 GPM2 YDR018C URH1 SNZ3 GSY1 BNA6 LSC2 GND2 BIO2 PUT2 DOG1 OYE2 GND1 RNR3 SGA1 TDH1 IMA5 MET5 YJR149W SOR1 UGP1 YKL071W PDC5 ECI1 TAL1 FBP1 YMR090W ALD3 YMR196W YNL134C GOR1 SNZ2 MDH2 ALD4 PMA2 OYE3 ICL2 GDB1
30°C	srb2∆	Tup1	Increased	Inhibitor	Decreased	Inhibitor	carbohydrate metabolic process [GO:0005975]	5.992e-07	17	94	YBR056W GLK1 EMI2 GLC3 PMI40 PCL10 SOL4 PCL7 SGA1 IMA5 TAL1 FBP1 YMR085W PGM2 MDH2 GPH1 GDB1
30°C	srb2∆	Tup1	Increased	Inhibitor	Decreased	Inhibitor	thiamine biosynthetic process [GO:0009228]	4.18e-06	7	17	SNZ3 THI4 THI11 THI12 SNZ2 THI20 THI21
30°C	srb2∆	Ifh1	Increased	Inhibitor	Increased	Activator	rRNA export from nucleus [GO:0006407]	<1e-14	12	27	RPS18A RPS2 RPS26A RPS0A RPS5 RPS0B RPS28B RPS18B RPS3 RPS19B RPS15 RPS10A
30°C	srb2∆	Ifh1	Increased	Inhibitor	Increased	Activator	maturation of SSU-rRNA from tricistronic rRNA transcript (SSU-rRNA, 5.8S rRNA, LSU-rRNA) [GO:0000462]	<1e-14	19	60	RPS8A RPS11B RPS9B RPS14A RPS16B FAL1 RPS13 RPS24A UTP22 RPS23A RPS20 RPS27B RPS14B RPS1A RPS1B RPS16A RPS9A RPS6A RPS23B
30°C	srb2∆	Ifh1	Increased	Inhibitor	Increased	Activator	translation [GO:0006412]	<1e-14	98	318	RPL19B RPS8A RPL23A RPL32 RPL4A RPS11B RPS9B RPS14A RPL31A RPP1A RPL13A RPS16B RPP1B RPL35A RPL4B RPS13 RPP2B RPL12B RPS18A RPL37B HYP2 RPL12A RPL34A RPS24A RPL2A RPL30 RPL24A RPL7A RPL28 RPS2 RPL9A RPS26A RPS25A RPS23A RPL24B RPS0A RPL14B RPS20 RPL27A YHR020W RPS27B RPL2B RPL34B RPL16A RPL40A RPS21B RPL17B RPS22A RPS14B RPL43B RPS5 RPS4A RPL14A RPL17A RPS21A RPL8B RPL15A RPS0B RPL22A RPL10 RPS31…
30°C	srb2∆	Ifh1	Increased	Inhibitor	Increased	Activator	ribosomal small subunit assembly [GO:0000028]	1.47e-11	8	14	RPS11B RPS14A RPS0A RPS27B RPS14B RPS0B RPS31 RPS17A
30°C	srb2∆	Ifh1	Increased	Inhibitor	Increased	Activator	ribosomal large subunit assembly [GO:0000027]	1.666e-11	11	38	RPL12B RPL12A DRS1 RPL10 RPP0 RPL6B RPL6A RPL25 RPL3 RPL5 RPL11A
30°C	srb2∆	Ifh1	Increased	Inhibitor	Increased	Activator	ribosome biogenesis [GO:0042254]	3.504e-10	18	170	RPS9B RPS14A FAL1 RPS2 UTP22 RPS0A RPL40A RPS14B DRS1 RPL8B RPS0B RPS31 RPP0 RPS7B RPS15 RPS7A RPS9A RPS6A
30°C	srb2∆	Ifh1	Increased	Inhibitor	Increased	Activator	endonucleolytic cleavage to generate mature 3'-end of SSU-rRNA from (SSU-rRNA, 5.8S rRNA, LSU-rRNA) [GO:0000461]	7.849e-08	4	4	RPS0A RPS21B RPS21A RPS0B
30°C	srb2∆	Ifh1	Increased	Inhibitor	Increased	Activator	rRNA processing [GO:0006364]	1.426e-07	16	195	RPS9B RPS14A FAL1 RPL30 RPS2 UTP22 RPS0A RPS21B RPS14B RPS21A DRS1 RPS0B RPS7B RPS7A RPS9A RPS6A
30°C	srb2∆	Ifh1	Increased	Inhibitor	Increased	Activator	regulation of translational fidelity [GO:0006450]	3.024e-07	5	10	RPL31A RPS23A RPS5 RPL31B RPS23B
30°C	srb2∆	Ifh1	Increased	Inhibitor	Increased	Activator	translational elongation [GO:0006414]	1.245e-06	6	22	RPP1A RPP1B RPP2B HYP2 RPP0 RPP2A
30°C	srb2∆	Ifh1	Increased	Inhibitor	Decreased	Inhibitor	methionine biosynthetic process [GO:0009086]	2.109e-05	4	31	MET6 MET3 MET5 MET17
30°C	srb2∆	Ash1	Increased	Inhibitor	Increased	Activator	detoxification of cadmium ion [GO:0071585]	9.635e-06	2	2	CUP1-1 CUP1-2
30°C	srb2∆	Ash1	Increased	Inhibitor	Increased	Activator	detoxification of copper ion [GO:0010273]	9.635e-06	2	2	CUP1-1 CUP1-2
30°C	srb2∆	Swi4	Increased	Inhibitor	Increased	Activator	ribosome biogenesis [GO:0042254]	<1e-14	36	170	MAK5 RPS9B ENP1 RRP7 FAP7 FCF1 NOP16 DBP3 CIC1 IPI1 IMP3 DBP8 FAF1 NOP9 MRT4 RPL8B NOC3 DIP2 EMG1 NOP56 UTP15 RRB1 RRP5 IMP4 RPS7B IPI3 DBP6 BRX1 NOP8 UTP23 NOC2 YTM1 RPS9A NOG1 NIP7 NOC4
30°C	srb2∆	Swi4	Increased	Inhibitor	Increased	Activator	rRNA processing [GO:0006364]	<1e-14	37	195	MAK5 RPS9B ENP1 RRP7 FAP7 SSB1 RRP45 FCF1 NOP16 DBP3 MTR3 ZUO1 IPI1 IMP3 DBP8 NOP9 MRT4 NOC3 DIP2 EMG1 NOP56 UTP15 RRB1 RRP5 RNT1 IMP4 RPS7B IPI3 SSU72 DBP6 RRP6 UTP23 YTM1 RPS9A NOG1 NIP7 NOC4
30°C	srb2∆	Swi4	Increased	Inhibitor	Increased	Activator	translation [GO:0006412]	1.708e-08	30	318	RPL32 TRM7 RPS9B RPL13A RPL35A SSB1 GCD6 GCD11 RPL7A RPL28 RPS26A GCD2 VAS1 RPS20 RPL8B RPL22A RPS1A TIF34 IMP4 RPS7B BRX1 WRS1 CDC33 GCD1 PRT1 RPS9A RPL5 RPL7B TIF5 RPL43A
30°C	srb2∆	Swi4	Increased	Inhibitor	Increased	Activator	U4 snRNA 3'-end processing [GO:0034475]	2.832e-07	6	11	RRP45 MTR3 RNT1 TRF5 PAP2 RRP6
30°C	srb2∆	Swi4	Increased	Inhibitor	Increased	Activator	endonucleolytic cleavage in 5'-ETS of tricistronic rRNA transcript (SSU-rRNA, 5.8S rRNA, LSU-rRNA) [GO:0000480]	8.024e-07	8	27	FCF1 DBP8 NOP9 DIP2 EMG1 RRP5 UTP23 NOC4
30°C	srb2∆	Swi4	Increased	Inhibitor	Increased	Activator	endonucleolytic cleavage to generate mature 5'-end of SSU-rRNA from (SSU-rRNA, 5.8S rRNA, LSU-rRNA) [GO:0000472]	1.473e-06	8	29	FCF1 DBP8 NOP9 DIP2 EMG1 RRP5 UTP23 NOC4
30°C	srb2∆	Swi4	Increased	Inhibitor	Increased	Activator	endonucleolytic cleavage in ITS1 to separate SSU-rRNA from 5.8S rRNA and LSU-rRNA from tricistronic rRNA transcript (SSU-rRNA, 5.8S rRNA, LSU-rRNA) [GO:0000447]	2.082e-06	9	40	ENP1 FCF1 DBP8 NOP9 DIP2 EMG1 RRP5 UTP23 NOC4
30°C	srb2∆	Swi4	Increased	Inhibitor	Increased	Activator	ribosomal large subunit biogenesis [GO:0042273]	1.077e-05	8	37	MAK5 NOP16 CIC1 MRT4 NOP8 YTM1 NOG1 NIP7
30°C	srb2∆	Swi4	Increased	Inhibitor	Increased	Activator	ribosomal large subunit assembly [GO:0000027]	1.329e-05	8	38	DBP3 IPI1 MRT4 IPI3 DBP6 BRX1 RPL5 NIP7
30°C	srb2∆	Swi4	Increased	Inhibitor	Decreased	Inhibitor	oxidation-reduction process [GO:0055114]	3.108e-09	28	272	GDH3 PRX1 UGA2 YDL124W HEM13 CTT1 GND2 GRE3 FMO1 OYE2 RNR3 GUT2 BNA1 YJR096W YJR149W GPX1 MCR1 CCP1 XYL2 FMS1 ARA2 ALD3 ALD2 YMR315W YNL134C GOR1 MDH2 IRC15
30°C	srb2∆	Swi4	Increased	Inhibitor	Decreased	Inhibitor	response to stress [GO:0006950]	3.112e-07	18	152	HSP26 SSE2 MRK1 NTH1 HSP42 SSA4 HSP12 CTT1 RTA1 GRE3 FMC1 XBP1 HSP104 DAK1 TSL1 DDR48 RSB1 FRT1
30°C	srb2∆	Swi4	Increased	Inhibitor	Decreased	Inhibitor	cellular response to oxidative stress [GO:0034599]	3.619e-07	12	67	PRX1 UGA2 YDL124W HSP12 GRE3 YJR096W GPX1 MCR1 CCP1 GAD1 NCE103 ATX1
30°C	srb2∆	Swi4	Increased	Inhibitor	Decreased	Inhibitor	carbohydrate metabolic process [GO:0005975]	4.079e-07	14	94	YBR056W GLK1 EMI2 HXK1 AMS1 NQM1 XKS1 SOL4 PKP1 SGA1 IMA5 XYL2 PGM2 MDH2
30°C	srb2∆	Swi4	Increased	Inhibitor	Decreased	Inhibitor	metabolic process [GO:0008152]	1.102e-05	29	425	GDH3 UGA2 YBR056W GPM2 NTH1 PHM8 SNZ3 HXK1 PYC1 AMS1 NQM1 GND2 OYE2 RNR3 SGA1 IMA5 BNA1 YJR149W SRY1 XYL2 GSY2 YMR084W ALD3 ALD2 YMR315W YNL134C GOR1 SNZ2 MDH2
30°C	srb2∆	Swi4	Increased	Inhibitor	Decreased	Inhibitor	polyamine catabolic process [GO:0006598]	2.384e-05	3	3	FMS1 ALD3 ALD2
30°C	srb2∆	Mig1	Increased	Inhibitor	Increased	Activator	siderophore transport [GO:0015891]	1.311e-05	3	8	SIT1 ARN2 FIT2
30°C	srb2∆	Mig1	Increased	Inhibitor	Decreased	Inhibitor	response to stress [GO:0006950]	2.487e-07	16	152	HSP26 TPS1 SSE2 MRK1 FMP45 NTH1 TPS2 HSP42 HSP31 HSP12 CTT1 WSC4 GRE3 ICT1 TSL1 DDR48
30°C	srb2∆	Mig1	Increased	Inhibitor	Decreased	Inhibitor	oxidation-reduction process [GO:0055114]	9.877e-06	19	272	ARA1 YDL124W ARI1 CTT1 GND2 GRE3 FMO1 RNR3 TDH1 BNA1 YJR096W GPX1 AHP1 IDP2 ERO1 ALD3 MDH2 IRC15 OYE3
30°C	srb2∆	Mig1	Increased	Inhibitor	Decreased	Inhibitor	metabolic process [GO:0008152]	2.366e-05	24	425	YBR056W GPM2 NTH1 YDR018C TPS2 GSY1 HXK1 PNC1 AMS1 ARI1 NQM1 GND2 DOG2 RNR3 SGA1 TDH1 INO1 BNA1 GSY2 FBP1 ALD3 MDH2 OYE3 THI6
30°C	srb2∆	Yap7	Increased	Inhibitor	Increased	Activator	translation [GO:0006412]	<1e-14	50	318	RPL19B RPL23A RPL4A RPL19A RPS6B RPL31A RPP1A RPL35B RPL35A RPL4B RPS17B RPS18A RPL37B GCD11 RPL23B RPL24A RPL28 RPL26B RPS23A RPL24B TYS1 RPL14B RPL27A RPS27B RPS24B RPL40A RPS21B RPS22A RPL43B RPL14A RPS21A RPL40B RPL22A RPS31 RPL37A RPS28B RPL38 RPS25B RPP0 RPL31B RPS17A RPS18B TIF11 RPS3 RPL25 RPS10A RPL20B RPS12 RPS6A TIF6
30°C	srb2∆	Yap7	Increased	Inhibitor	Increased	Activator	regulation of translational fidelity [GO:0006450]	1.091e-05	4	10	RPL31A RPS23A ZUO1 RPL31B
30°C	srb2∆	Yap7	Increased	Inhibitor	Decreased	Inhibitor	trehalose biosynthetic process [GO:0005992]	2.083e-05	3	7	TPS1 TPS2 TSL1
30°C	srb2∆	Ecm22	Increased	Inhibitor	Increased	Activator	ergosterol biosynthetic process [GO:0006696]	<1e-14	14	23	ERG28 ERG26 ERG4 ERG25 ERG11 ERG7 ERG3 ERG6 HMG1 ERG13 ERG5 ERG2 ERG12 ERG8
30°C	srb2∆	Ecm22	Increased	Inhibitor	Increased	Activator	steroid biosynthetic process [GO:0006694]	<1e-14	14	25	ERG28 ERG26 ERG4 ERG25 ERG11 ERG7 ERG3 ERG6 HMG1 ERG13 ERG5 ERG2 ERG12 ERG8
30°C	srb2∆	Ecm22	Increased	Inhibitor	Increased	Activator	sterol biosynthetic process [GO:0016126]	<1e-14	15	29	UPC2 ERG28 ERG26 ERG4 ERG25 ERG11 ERG3 ECM22 ERG6 HMG1 ERG13 ERG5 ERG2 ERG12 ERG8
30°C	srb2∆	Ecm22	Increased	Inhibitor	Increased	Activator	lipid biosynthetic process [GO:0008610]	<1e-14	14	52	ERG28 ERG26 ERG4 ERG25 ERG11 ERG7 ERG3 ERG6 HMG1 ERG13 ERG5 ERG2 ERG12 ERG8
30°C	srb2∆	Ecm22	Increased	Inhibitor	Increased	Activator	isopentenyl diphosphate biosynthetic process, mevalonate pathway [GO:0019287]	1.779e-06	3	3	HMG1 ERG12 ERG8
30°C	srb2∆	Ecm22	Increased	Inhibitor	Increased	Activator	isoprenoid biosynthetic process [GO:0008299]	9.656e-06	4	12	HMG1 ERG13 ERG12 ERG8
30°C	srb2∆	Ecm22	Increased	Inhibitor	Decreased	Inhibitor	oxidation-reduction process [GO:0055114]	1.489e-10	21	272	BDH1 GDH3 ADH5 ARA1 YDL124W HEM13 TSA2 ARI1 GND2 OYE2 COX5B GUT2 HYR1 TDH1 YKL071W XYL2 AHP1 AIM33 GCY1 IRC15 OYE3
30°C	srb2∆	Ecm22	Increased	Inhibitor	Decreased	Inhibitor	cellular response to oxidative stress [GO:0034599]	4.431e-06	8	67	YDL124W TSA2 HSP12 HYR1 AHP1 NCE103 ATX1 GCY1
30°C	srb2∆	Hms1	Increased	Inhibitor	Increased	Activator	translation [GO:0006412]	<1e-14	62	318	RPL19B RPL23A RPL32 RPL4A RPS11B RPL19A RPL31A RPP1A RPL35B RPL35A SSB1 RPL4B RPS13 YDR341C RPS17B RPS18A RPL37B GCD11 RPL23B RPL30 RPL24A RPL28 RPS26A RPS25A RPL26B RPS23A RPL24B TYS1 RPL14B RPL27A DED81 RPS27B SSZ1 RPS24B RPL40A RPS21B RPL43B RPL14A RPS21A RPL40B FRS1 RPL22A RPS31 RPL37A RPS28B RPL38 RPS25B RPP0 RPL31B RPS17A RPS18B RPL20A TIF11 RPS19B RPS19A RPL25 RPL3 RPS10A RPL20B RPS12 RPL3…
30°C	srb2∆	Hms1	Increased	Inhibitor	Increased	Activator	regulation of translational fidelity [GO:0006450]	4.146e-08	6	10	RPL31A SSB1 RPS23A ZUO1 SSZ1 RPL31B
30°C	srb2∆	Hms1	Increased	Inhibitor	Increased	Activator	rRNA export from nucleus [GO:0006407]	2.997e-06	7	27	RPS18A RPS26A RPS28B RPS18B RPS19B RPS19A RPS10A
30°C	srb2∆	Hms1	Increased	Inhibitor	Increased	Activator	endonucleolytic cleavage in ITS1 to separate SSU-rRNA from 5.8S rRNA and LSU-rRNA from tricistronic rRNA transcript (SSU-rRNA, 5.8S rRNA, LSU-rRNA) [GO:0000447]	4.771e-06	8	40	FCF1 RPS18A RPS21B UTP11 RPS21A FCF2 RPS18B BUD21
30°C	srb2∆	Hms1	Increased	Inhibitor	Increased	Activator	ribosomal small subunit assembly [GO:0000028]	1.485e-05	5	14	RPS11B RPS17B RPS27B RPS31 RPS17A
30°C	srb2∆	Hms1	Increased	Inhibitor	Increased	Activator	ribosome biogenesis [GO:0042254]	1.833e-05	15	170	FCF1 PXR1 RPL40A ALB1 UTP11 RPL40B SDO1 FCF2 RPS31 RSA3 RPP0 NOP15 NOP8 BUD21 NIP7
30°C	srb2∆	Hms1	Increased	Inhibitor	Increased	Activator	rRNA processing [GO:0006364]	2.381e-05	16	195	SSB1 FCF1 RPL30 PXR1 ZUO1 SSZ1 RPS21B UTP11 RPS21A SDO1 FCF2 FYV7 NOP15 POP3 BUD21 NIP7
30°C	srb2∆	Hms1	Increased	Inhibitor	Decreased	Inhibitor	metabolic process [GO:0008152]	8.886e-10	36	425	GDH3 NTH2 UGA2 ADH5 GPM2 SFA1 ENA2 TPS2 URH1 APA2 AGX1 BIO2 PUT2 OYE2 GND1 CRG1 RNR3 TDH1 INO1 IMA5 MET5 MDH1 XYL2 PDC5 GSY2 MET17 TAL1 FBP1 CYB2 ALD2 YMR196W MDH2 SPR1 PMA2 THI6 ICL2
30°C	srb2∆	Hms1	Increased	Inhibitor	Decreased	Inhibitor	oxidation-reduction process [GO:0055114]	2.295e-08	26	272	GDH3 UGA2 ADH5 SFA1 AAD4 MXR1 AIM17 PUT2 FMO1 OYE2 GND1 RNR3 TDH1 YJR096W JHD2 MET5 MDH1 SDH2 XYL2 CYB2 AIM33 NDI1 FMS1 ALD2 AAD14 MDH2
30°C	srb2∆	YPR196W	Increased	Inhibitor	Increased	Activator	rRNA processing [GO:0006364]	3.313e-09	10	195	RRP7 RRP45 FCF1 LCP5 SKI6 UTP9 NAF1 POP3 UTP23 BUD21
30°C	srb2∆	YPR196W	Increased	Inhibitor	Increased	Activator	ribosome biogenesis [GO:0042254]	3.28e-07	8	170	RRP7 FCF1 LCP5 UTP9 ALB1 NAF1 UTP23 BUD21
30°C	srb2∆	YPR196W	Increased	Inhibitor	Decreased	Inhibitor	response to stress [GO:0006950]	2.203e-06	8	152	HSP26 SSE2 TPS2 MTL1 DAN4 HSP104 TSL1 FRT1
30°C	srb2∆	YPR196W	Increased	Inhibitor	Decreased	Inhibitor	trehalose biosynthetic process [GO:0005992]	6.561e-06	3	7	TPS2 TSL1 PGM2
30°C	srb2∆	Bas1	Increased	Inhibitor	Increased	Activator	ribosome biogenesis [GO:0042254]	<1e-14	53	170	RPS6B RPS9B RRP7 KRR1 RPS14A FAP7 NOP6 ESF1 DBP3 NSA1 RPS2 UTP22 GAR1 ALB1 RPS14B MRT4 RPL40B DRS1 SOF1 RIX7 RPL8B DIP2 RPS31 EMG1 NOP56 RSA3 DBP9 RPP0 UTP14 ERB1 UTP15 RRB1 RRP5 HAS1 RPS7B NAF1 KRI1 DBP6 RPS15 NOP12 BRX1 NOP8 UTP23 BUD21 NOC2 YTM1 RRS1 NOP58 RPS9A RPS6A RSA1 DIM1 RRP9
30°C	srb2∆	Bas1	Increased	Inhibitor	Increased	Activator	translation [GO:0006412]	<1e-14	97	318	RBG1 RPL19B RPS8A RPL32 RPL19A RPS6B RPS9B RPS14A RPL31A RPL13A RPS16B RPL35B RPL35A RPL4B RPS17B RPS18A RPL12A RPL34A RPS8B RPL2A RPL24A RPL7A RPL28 RPS2 RPL1B RPL9A RPS25A RPS23A RPL24B TIF4631 RPL14B RPS20 RPL27A DED81 YHR020W RPS4B RPL2B RPL34B RPL16A RPL17B RPS22A RPS14B RPL43B RPS5 RPS4A RPL17A RPS21A RPL40B RPL8B RPL15A FRS1 RPL22A RPL10 RPS31 RPL37A RPL38 RPS25B RPP0 RPL31B RPS1A RPL6B RP…
30°C	srb2∆	Bas1	Increased	Inhibitor	Increased	Activator	rRNA processing [GO:0006364]	<1e-14	46	195	RPS6B RPS9B RRP7 KRR1 RPS14A FAP7 NOP6 BFR2 ESF1 DBP3 NSA1 RPS2 UTP22 NSR1 ZUO1 GAR1 MTR4 RPS14B MRT4 RPS21A DRS1 SOF1 DIP2 EMG1 PWP1 NOP56 DBP9 UTP14 ERB1 UTP15 RRB1 RRP5 HAS1 RPS7B NAF1 KRI1 DBP6 NOP12 UTP23 BUD21 YTM1 NOP58 RPS9A RPS6A DIM1 RRP9
30°C	srb2∆	Bas1	Increased	Inhibitor	Increased	Activator	ribosomal large subunit assembly [GO:0000027]	1.033e-11	17	38	RPL12A DBP3 YVH1 MRT4 RPF2 DRS1 RPL10 RSA3 DBP9 RPP0 RPL6B RPL6A DBP6 BRX1 RPL25 RPL5 RSA1
30°C	srb2∆	Bas1	Increased	Inhibitor	Increased	Activator	maturation of SSU-rRNA from tricistronic rRNA transcript (SSU-rRNA, 5.8S rRNA, LSU-rRNA) [GO:0000462]	7.909e-10	19	60	RPS8A RPS6B RPS9B RPS14A RPS16B FAP7 RPS8B UTP22 RPS23A RPS20 RPS14B SOF1 DIP2 RPS1A RPS1B UTP15 BUD21 RPS9A RPS6A
30°C	srb2∆	Bas1	Increased	Inhibitor	Increased	Activator	purine nucleotide biosynthetic process [GO:0006164]	1.491e-08	10	18	ADE1 MIS1 ADE8 ADE6 IMD2 MTD1 ADE13 ADE17 ADE4 ADE2
30°C	srb2∆	Bas1	Increased	Inhibitor	Increased	Activator	endonucleolytic cleavage in ITS1 to separate SSU-rRNA from 5.8S rRNA and LSU-rRNA from tricistronic rRNA transcript (SSU-rRNA, 5.8S rRNA, LSU-rRNA) [GO:0000447]	3.319e-08	14	40	KRR1 BUD23 RPS18A RPS21A DIP2 EMG1 RPS18B UTP14 RRP5 KRI1 UTP23 BUD21 RRS1 NOP58
30°C	srb2∆	Bas1	Increased	Inhibitor	Increased	Activator	'de novo' IMP biosynthetic process [GO:0006189]	8.445e-08	7	9	ADE1 ADE8 ADE6 ADE13 ADE17 ADE4 ADE2
30°C	srb2∆	Bas1	Increased	Inhibitor	Increased	Activator	rRNA export from nucleus [GO:0006407]	1.67e-07	11	27	RPS18A SRM1 RPS2 RPS5 RPS18B RNA1 RPS3 RPS19B RPS15 RPS19A RPS10A
30°C	srb2∆	Bas1	Increased	Inhibitor	Increased	Activator	ribosomal small subunit assembly [GO:0000028]	6.186e-06	7	14	RRP7 RPS14A RPS17B NSR1 RPS14B RPS31 RPS17A
30°C	srb2∆	Bas1	Increased	Inhibitor	Increased	Activator	iron ion homeostasis [GO:0055072]	1.124e-05	9	26	SIT1 FTR1 ARN1 ARN2 FRE1 FET4 FRE4 ENB1 FIT2
30°C	srb2∆	Bas1	Increased	Inhibitor	Increased	Activator	UMP biosynthetic process [GO:0006222]	1.262e-05	4	4	DAS2 URA3 URA1 URK1
30°C	srb2∆	Bas1	Increased	Inhibitor	Increased	Activator	methylation [GO:0032259]	1.433e-05	15	71	NCL1 KAR4 BUD23 TRM3 TRM8 TRM1 ADE8 EFM1 EMG1 ERG6 TRM10 TRM13 CDC21 DIM1 SAM4
30°C	srb2∆	Bas1	Increased	Inhibitor	Decreased	Inhibitor	oxidation-reduction process [GO:0055114]	<1e-14	76	272	BDH1 BDH2 GDH3 PRX1 UGA2 ETR1 RFS1 ADH5 ARA1 AAD3 NDE2 YDL114W YDL124W AAD4 PST2 HEM13 TSA2 MXR1 ARI1 POX1 CTT1 COQ6 GND2 HTD2 GRE3 TRR2 FMO1 GND1 DOT5 RNR3 GUT2 IRC24 HYR1 TDH1 BNA1 BNA2 YJR096W JHD2 MET5 YJR149W AAD10 GPX1 YKL071W MDH1 YKL107W SDH1 MCR1 FMP46 CCP1 SDH2 XYL2 AHP1 IDP2 TSA1 CYB2 AIM33 NDI1 ERO1 FMS1 ARA2 ALD3 ALD2 YMR315W IDP3 YNL134C GOR1 AAD14 GPD2 MDH2 FRE7 GCY1 ALD4 IRC15 OYE…
30°C	srb2∆	Bas1	Increased	Inhibitor	Decreased	Inhibitor	metabolic process [GO:0008152]	1.102e-10	75	425	BDH1 BDH2 GDH3 NTH2 UGA2 ETR1 YBR056W TKL2 ADH5 GPM2 YDL114W NTH1 GAL3 YDR018C TPS2 URH1 APA2 YEF1 PHM8 AGX1 SNZ3 HXK1 PNC1 AMS1 ARI1 POX1 NQM1 COQ6 GND2 BIO2 DOG1 GND1 CRG1 RNR3 SGA1 POT1 IRC24 TDH1 INO1 BNA1 MET5 YJR149W UGP1 YKL071W MDH1 YKL107W MCD4 XYL2 BNA5 GSY2 MET17 YLR345W TAL1 FBP1 CYB2 YMR090W ALD3 ALD2 YMR196W YMR315W SPO1 LEU4 YNL134C GOR1 SNZ2 GPD2 MDH2 SPR1 ALD4 PMA2 OYE3 THI6 ICL2…
30°C	srb2∆	Bas1	Increased	Inhibitor	Decreased	Inhibitor	cellular response to oxidative stress [GO:0034599]	1.541e-09	23	67	PRX1 UGA2 TRX3 YDL124W TSA2 GRX2 MXR1 HSP12 GRE3 TRR2 GND1 DOT5 HYR1 YJR096W GPX1 MCR1 CCP1 AHP1 TSA1 GAD1 NCE103 GCY1 OXR1
30°C	srb2∆	Bas1	Increased	Inhibitor	Decreased	Inhibitor	thiamine biosynthetic process [GO:0009228]	9.474e-09	11	17	THI13 THI5 SNZ3 SNO3 THI4 RPI1 THI11 THI12 SNZ2 THI20 THI6
30°C	srb2∆	Bas1	Increased	Inhibitor	Decreased	Inhibitor	carbohydrate metabolic process [GO:0005975]	2.369e-08	26	94	YBR056W GLK1 GAL3 YDR248C EMI2 GLC3 PMI40 HXK1 PKP2 AMS1 NQM1 SOL4 PKP1 SGA1 MDH1 XYL2 TAL1 FBP1 YMR085W PGM2 GPD2 MDH2 SPR1 PCL8 GPH1 GDB1
30°C	srb2∆	Bas1	Increased	Inhibitor	Decreased	Inhibitor	response to stress [GO:0006950]	6.421e-07	32	152	FRT2 HSP26 TPS1 SSE2 FMP45 AAD4 NTH1 TPS2 HSP42 HSP78 HSP31 SSA4 HSP12 PAU5 DAK2 CTT1 RTA1 WSC4 GRE3 FMC1 XBP1 KAR2 DAN4 HSP104 UBI4 ICT1 TSL1 RIM11 DDR48 RSB1 FRT1 GRE1
30°C	srb2∆	Bas1	Increased	Inhibitor	Decreased	Inhibitor	biological_process [GO:0008150]	1.027e-05	139	1203	FUN14 FUN19 YAL037W BDH2 YAR023C YBL029C-A MOH1 RFS1 YRO2 YBR056W YBR085C-A YBR137W RTC2 APD1 ICS2 OM14 BIT2 YBR284W YBR285W GPM2 BDF2 YET3 UBX3 TMA17 YDL114W SNA4 UGX2 RTN2 YDL206W YDL211C YDL218W PST2 MRH1 FMP16 YDR262W PHM6 YDR391C YDR476C SPG3 FPR2 HSP31 VAB2 YEL023C YEL073C HVG1 RRT13 YER079W YER121W YER158C FMP10 PAU5 YFL041W-A IGD1 YGL081W YGL117W RRT6 ARI1 YGL230C NQM1 YGR066C YGR127W RTS…
30°C	srb2∆	Bas1	Increased	Inhibitor	Decreased	Inhibitor	tricarboxylic acid cycle [GO:0006099]	1.528e-05	11	30	SDH4 MDH1 SDH3 SDH1 SDH2 IDP2 IDP3 MLS1 CIT1 MDH2 CIT3
30°C	srb2∆	Bas1	Increased	Inhibitor	Decreased	Inhibitor	cell redox homeostasis [GO:0045454]	2.192e-05	11	31	PRX1 TRX3 TSA2 GRX2 EUG1 TRR2 DOT5 AHP1 TSA1 POR1 IRC15
30°C	srb2∆	Swi5	Increased	Inhibitor	Increased	Activator	translation [GO:0006412]	<1e-14	25	318	RPL4A RPL31A RPP1A RPL35B RPL35A RPS17B RPL23B RPL24A RPL26B RPS23A RPL24B RPL27A RPS27B RPS24B RPL43B RPS4A RPS21A RPL37A RPS25B RPP0 TIF11 RPL25 RPL3 RPS10A RPL43A
30°C	srb2∆	Swi5	Increased	Inhibitor	Increased	Activator	'de novo' pyrimidine base biosynthetic process [GO:0006207]	2.083e-05	3	7	URA3 URA1 URA4
30°C	srb2∆	Upc2	Increased	Inhibitor	Increased	Activator	sterol biosynthetic process [GO:0016126]	<1e-14	11	29	UPC2 ERG28 ERG26 ERG25 ERG11 ERG3 ECM22 ERG6 ERG2 ERG8 CYB5
30°C	srb2∆	Upc2	Increased	Inhibitor	Increased	Activator	ergosterol biosynthetic process [GO:0006696]	7.078e-12	8	23	ERG28 ERG26 ERG25 ERG11 ERG3 ERG6 ERG2 ERG8
30°C	srb2∆	Upc2	Increased	Inhibitor	Increased	Activator	steroid biosynthetic process [GO:0006694]	1.541e-11	8	25	ERG28 ERG26 ERG25 ERG11 ERG3 ERG6 ERG2 ERG8
30°C	srb2∆	Upc2	Increased	Inhibitor	Increased	Activator	lipid biosynthetic process [GO:0008610]	9e-09	8	52	ERG28 ERG26 ERG25 ERG11 ERG3 ERG6 ERG2 ERG8
30°C	srb2∆	Upc2	Increased	Inhibitor	Increased	Activator	siderophore transport [GO:0015891]	3.168e-07	4	8	SIT1 ARN1 FRE4 FIT2
30°C	srb2∆	Upc2	Increased	Inhibitor	Decreased	Inhibitor	response to stress [GO:0006950]	9.083e-06	10	152	HSP26 HSP42 HSP31 SSA4 PAU5 RTA1 WSC4 DAN4 ICT1 DDR48
30°C	srb2∆	Met31	Increased	Inhibitor	Increased	Activator	endonucleolytic cleavage to generate mature 5'-end of SSU-rRNA from (SSU-rRNA, 5.8S rRNA, LSU-rRNA) [GO:0000472]	<1e-14	27	29	UTP20 PWP2 NOP14 SAS10 FCF1 UTP6 UTP7 DBP8 NOP9 UTP18 UTP10 MPP10 UTP11 FCF2 DIP2 EMG1 UTP13 UTP14 RRP5 ESF2 RCL1 UTP23 BUD21 PNO1 NOP58 MRD1 NOC4
30°C	srb2∆	Met31	Increased	Inhibitor	Increased	Activator	endonucleolytic cleavage in 5'-ETS of tricistronic rRNA transcript (SSU-rRNA, 5.8S rRNA, LSU-rRNA) [GO:0000480]	<1e-14	25	27	UTP20 PWP2 NOP14 SAS10 FCF1 UTP6 UTP7 DBP8 NOP9 UTP18 UTP10 MPP10 UTP11 FCF2 DIP2 EMG1 UTP13 UTP14 RRP5 ESF2 RCL1 UTP23 NOP58 MRD1 NOC4
30°C	srb2∆	Met31	Increased	Inhibitor	Increased	Activator	endonucleolytic cleavage in ITS1 to separate SSU-rRNA from 5.8S rRNA and LSU-rRNA from tricistronic rRNA transcript (SSU-rRNA, 5.8S rRNA, LSU-rRNA) [GO:0000447]	<1e-14	37	40	UTP20 ENP1 KRR1 BUD23 PWP2 NOP14 SAS10 FCF1 UTP6 UTP7 RPS0A DBP8 NOP9 UTP18 UTP10 RPS21B MPP10 UTP11 RPS21A RPS0B FCF2 DIP2 EMG1 UTP13 RPS18B UTP14 RRP5 KRI1 ESF2 RCL1 UTP23 BUD21 PNO1 RRS1 NOP58 MRD1 NOC4
30°C	srb2∆	Met31	Increased	Inhibitor	Increased	Activator	ribosomal large subunit biogenesis [GO:0042273]	<1e-14	29	37	MAK16 MAK5 REI1 ARX1 PUF6 NOP16 NSA1 NOP7 TIF4631 SDA1 CIC1 ALB1 MRT4 MAK11 RRP14 RIX7 RLP24 SDO1 AFG2 ERB1 RLP7 NOP15 NOP8 YTM1 RRS1 NOG1 NIP7 TIF6 JIP5
30°C	srb2∆	Met31	Increased	Inhibitor	Increased	Activator	ribosome biogenesis [GO:0042254]	<1e-14	131	170	UTP20 MAK5 RPS6B ENP1 REI1 RRP7 SPB1 KRR1 RPS14A PWP2 DBP10 TSR1 NOP14 SAS10 NHP2 NOP6 FAL1 MAK21 UTP4 FCF1 ESF1 UTP5 UTP6 NOP16 NUG1 UTP7 LCP5 CGR1 DBP3 NSA1 RPS2 ROK1 SLX9 UTP22 NOP7 UTP8 ENP2 RPS0A SDA1 PXR1 CIC1 RRP3 SSF1 IPI1 RPF1 GAR1 IMP3 DBP8 UTP9 RIX1 FAF1 UTP25 RPL40A NOP9 HCA4 UTP18 UTP10 ALB1 RPS14B MPP10 MRT4 URB1 MAK11 DHR2 RRP14 UTP11 EBP2 DBP7 UTP30 RPL40B DRS1 SOF1 RIX7 NOC3 RLP2…
30°C	srb2∆	Met31	Increased	Inhibitor	Increased	Activator	maturation of SSU-rRNA from tricistronic rRNA transcript (SSU-rRNA, 5.8S rRNA, LSU-rRNA) [GO:0000462]	<1e-14	46	60	RPS8A RPS11B RPS6B RPS14A PWP2 RPS16B NOP14 SAS10 FAL1 RPS11A RPS13 UTP4 UTP5 UTP6 RPS24A UTP7 RPS8B SLX9 UTP22 NOP7 RPS23A UTP8 RPS20 RPS27B RRP3 UTP9 FAF1 RPS24B UTP25 UTP10 RPS14B DHR2 SOF1 FYV7 DIP2 UTP13 TSR2 RPS1B UTP15 ECM16 RIO2 BUD21 RRP12 RPS9A RPS6A NAN1
30°C	srb2∆	Met31	Increased	Inhibitor	Increased	Activator	ribosomal large subunit assembly [GO:0000027]	<1e-14	28	38	RSA4 DBP10 MAK21 DBP3 LSG1 SSF1 IPI1 RPF1 RIX1 YVH1 MRT4 MAK11 DBP7 RPF2 DRS1 RPL10 RSA3 DBP9 RPP0 RPL6A IPI3 DBP6 BRX1 REX4 RPL25 RPL5 RSA1 NIP7
30°C	srb2∆	Met31	Increased	Inhibitor	Increased	Activator	rRNA processing [GO:0006364]	<1e-14	129	195	UTP20 MAK5 RPS6B ENP1 RRP7 SPB1 KRR1 RPS14A RRP43 PWP2 DBP10 TSR1 NOP14 SAS10 NHP2 NOP6 SSB1 FAL1 RRP45 BFR2 UTP4 FCF1 ESF1 UTP5 UTP6 NOP16 NUG1 UTP7 LCP5 CGR1 DBP3 NSA1 RPS2 ROK1 SLX9 UTP22 NOP7 UTP8 ENP2 MTR3 NSR1 SKI6 RPS0A PXR1 ZUO1 RRP3 IPI1 RPF1 GAR1 IMP3 DBP8 UTP9 RIX1 UTP25 NOP9 HCA4 MTR4 UTP18 UTP10 RPS21B RPS14B MPP10 MRT4 URB1 DHR2 RRP14 UTP11 EBP2 DBP7 RPS21A UTP30 DRS1 SOF1 NOC3 SDO1…
30°C	srb2∆	Met31	Increased	Inhibitor	Increased	Activator	translation [GO:0006412]	<1e-14	125	318	MAK16 FUN12 RBG1 RPL19B RPS8A RPL23A RPL32 RPL4A RPS11B TRM7 RPG1 RPL19A RPS6B RPS14A RPL31A RPP1A RPL13A RPS16B RPL35B RPL35A SSB1 RPL4B SES1 RPS11A RPS13 GIR2 SUP35 GCD6 RPP2B RPS17B RPL37B GCD11 RPL34A RPS24A RPS8B RPL23B RPL2A RPL24A RPS2 RPL1B RPL9A RPS26A RPL26B YGR054W GCD2 VAS1 RPS23A TIF4631 TYS1 RPS0A MES1 RPL14B RPS20 RPL27A RPS27B RPF1 RPS4B RPL2B RPL34B RPS24B RPL16A RPL40A RPS21B RP…
30°C	srb2∆	Met31	Increased	Inhibitor	Increased	Activator	ribosomal small subunit biogenesis [GO:0042274]	2.546e-12	17	24	KRR1 NOP14 NOP6 ENP2 UTP25 RRP14 UTP30 CMS1 EMG1 SGD1 UTP21 BUD22 KRE33 RPS19B RPS19A NEW1 NOC4
30°C	srb2∆	Met31	Increased	Inhibitor	Increased	Activator	maturation of LSU-rRNA from tricistronic rRNA transcript (SSU-rRNA, 5.8S rRNA, LSU-rRNA) [GO:0000463]	2.925e-11	14	18	MAK16 MAK5 SPB1 RPL35B RPL35A RPF1 URB1 MAK11 RPF2 RLP7 NOP12 NOP53 TIF6 RRP15
30°C	srb2∆	Met31	Increased	Inhibitor	Increased	Activator	ribosomal small subunit assembly [GO:0000028]	3.658e-09	11	14	RPS11B RRP7 RPS14A RPS11A RPS17B NSR1 RPS0A RPS27B RPS14B RPS0B RPS17A
30°C	srb2∆	Met31	Increased	Inhibitor	Increased	Activator	RNA processing [GO:0006396]	3.183e-08	17	37	RRP43 TRM3 RRP45 UTP6 RPL1B MTR3 SKI6 CIC1 UTP30 FYV7 CBF5 RRP5 RNT1 RCL1 RRP6 RPL1A SMX3
30°C	srb2∆	Met31	Increased	Inhibitor	Increased	Activator	tRNA transcription from RNA polymerase III promoter [GO:0042797]	2.44e-07	10	15	RPB5 RPC11 RPC17 RPC25 RPC37 RPC19 RPC34 RPC40 RPO26 RPC82
30°C	srb2∆	Met31	Increased	Inhibitor	Increased	Activator	translational initiation [GO:0006413]	4.629e-07	17	43	FUN12 RPG1 GCD6 GCD11 YGR054W GCD2 TIF4631 GCN3 TIF34 TIF11 NIP1 CDC33 GCD1 PRT1 SUI3 TIF6 TIF5
30°C	srb2∆	Met31	Increased	Inhibitor	Increased	Activator	nuclear polyadenylation-dependent CUT catabolic process [GO:0071039]	4.697e-07	8	10	MTR3 SKI6 AIR1 TRF5 MPP6 DIS3 PAP2 RRP6
30°C	srb2∆	Met31	Increased	Inhibitor	Increased	Activator	nuclear polyadenylation-dependent tRNA catabolic process [GO:0071038]	5.905e-07	10	16	RRP43 RRP45 MTR3 SKI6 AIR1 MTR4 TRF5 DIS3 PAP2 RRP6
30°C	srb2∆	Met31	Increased	Inhibitor	Increased	Activator	nuclear polyadenylation-dependent rRNA catabolic process [GO:0071035]	5.905e-07	10	16	RRP43 RRP45 MTR3 AIR1 MTR4 TRF5 MPP6 DIS3 PAP2 RRP6
30°C	srb2∆	Met31	Increased	Inhibitor	Increased	Activator	ribosomal subunit export from nucleus [GO:0000054]	6.286e-07	9	13	SSB1 SRM1 LSG1 ZUO1 RIX1 SDO1 NOC2 NOG1 TIF6
30°C	srb2∆	Met31	Increased	Inhibitor	Increased	Activator	ergosterol biosynthetic process [GO:0006696]	6.296e-07	12	23	ERG28 ERG26 ERG4 ERG25 ERG11 ERG7 ERG3 ERG6 HMG1 ERG5 ERG2 ERG12
30°C	srb2∆	Met31	Increased	Inhibitor	Increased	Activator	rRNA export from nucleus [GO:0006407]	7.033e-07	13	27	SRM1 RPS2 RPS26A RPS0A RPS5 RPS0B RPS28B RPS18B RPS3 RPS19B RPS15 RPS19A RPS10A
30°C	srb2∆	Met31	Increased	Inhibitor	Increased	Activator	methylation [GO:0032259]	1.38e-06	22	71	NCL1 HMT1 TRM7 SPB1 BUD23 TRM3 TRM8 TRM1 ADE8 RMT2 EFM1 HPM1 EMG1 ERG6 NOP2 TRM10 TRM11 TRM13 PPM2 CDC21 DIM1 SAM4
30°C	srb2∆	Met31	Increased	Inhibitor	Increased	Activator	U4 snRNA 3'-end processing [GO:0034475]	1.566e-06	8	11	RRP45 MTR3 SKI6 MTR4 RNT1 TRF5 PAP2 RRP6
30°C	srb2∆	Met31	Increased	Inhibitor	Increased	Activator	nuclear polyadenylation-dependent mRNA catabolic process [GO:0071042]	1.599e-06	9	14	RRP43 RRP45 MTR3 SKI6 MTR4 TRF5 DIS3 PAP2 RRP6
30°C	srb2∆	Met31	Increased	Inhibitor	Increased	Activator	maturation of 5.8S rRNA from tricistronic rRNA transcript (SSU-rRNA, 5.8S rRNA, LSU-rRNA) [GO:0000466]	1.599e-06	9	14	MAK16 MAK5 SPB1 RPF1 URB1 MAK11 RPF2 TIF6 RRP15
30°C	srb2∆	Met31	Increased	Inhibitor	Increased	Activator	sterol biosynthetic process [GO:0016126]	1.954e-06	13	29	UPC2 ERG28 ERG26 ERG4 ERG25 ERG11 ERG3 ECM22 ERG6 HMG1 ERG5 ERG2 ERG12
30°C	srb2∆	Met31	Increased	Inhibitor	Increased	Activator	steroid biosynthetic process [GO:0006694]	1.99e-06	12	25	ERG28 ERG26 ERG4 ERG25 ERG11 ERG7 ERG3 ERG6 HMG1 ERG5 ERG2 ERG12
30°C	srb2∆	Met31	Increased	Inhibitor	Increased	Activator	polyadenylation-dependent snoRNA 3'-end processing [GO:0071051]	3.631e-06	9	15	RRP43 RRP45 MTR3 SKI6 MTR4 TRF5 DIS3 PAP2 RRP6
30°C	srb2∆	Met31	Increased	Inhibitor	Increased	Activator	DNA replication [GO:0006260]	3.833e-06	22	75	MCM2 POL12 POL30 MCM7 DCC1 MRC1 DBF4 SLD5 POL5 RNR1 SLD3 MCM6 CDC6 PRI2 RAD27 NOC3 CDC45 MCM5 POL1 POL2 TOF1 DPB2
30°C	srb2∆	Met31	Increased	Inhibitor	Increased	Activator	positive regulation of transcription from RNA polymerase I promoter [GO:0045943]	4.272e-06	8	12	UTP4 UTP5 UTP8 UTP9 SCH9 UTP10 UTP15 NAN1
30°C	srb2∆	Met31	Increased	Inhibitor	Increased	Activator	tRNA methylation [GO:0030488]	5.095e-06	10	19	NCL1 TRM7 TRM3 TRM8 TRM1 TRM82 TRM10 TRM11 TRM13 PPM2
30°C	srb2∆	Met31	Increased	Inhibitor	Increased	Activator	DNA-dependent DNA replication initiation [GO:0006270]	1.634e-05	13	34	MCM2 POL12 MCM7 DBF4 SLD3 MCM6 PRI2 NOC3 CDC45 MCM5 POL1 RAD53 CDC60
30°C	srb2∆	Met31	Increased	Inhibitor	Decreased	Inhibitor	oxidation-reduction process [GO:0055114]	1.021e-14	72	272	BDH2 PRX1 UGA2 ETR1 RFS1 ARA1 ADH7 NDE2 YDL114W YDL124W SFA1 AAD4 PST2 HEM13 TSA2 MXR1 POX1 CTT1 COQ6 GND2 AIM17 PUT2 HTD2 GRE3 TRR2 FMO1 GND1 RNR3 COX5B IRC24 HYR1 TDH1 YJR096W JHD2 MET5 YJR149W SOR1 YKL071W MDH1 YKL107W MCR1 FOX2 FMP46 CCP1 SDH2 XYL2 AHP1 IDP2 TSA1 CYB2 AIM33 ERO1 ARA2 ALD3 ALD2 YMR315W IDP3 YNL134C GOR1 AAD14 GPD2 MDH2 FRE7 AAD15 CYC2 GCY1 DFR1 ALD4 IRC15 OYE3 YPR127W MET16
30°C	srb2∆	Met31	Increased	Inhibitor	Decreased	Inhibitor	metabolic process [GO:0008152]	5.411e-10	84	425	BDH2 NTH2 UGA2 ETR1 YBR056W TKL2 ADH7 GPM2 YDL114W SFA1 NTH1 GAL3 YDR018C EHD3 ENA5 TPS2 URH1 APA2 YEF1 PHM8 AGX1 SNZ3 GSY1 BNA6 HXK1 PNC1 PYC1 AMS1 POX1 NQM1 COQ6 GND2 BIO2 PUT2 DOG2 ATG7 GND1 CRG1 RNR3 SGA1 POT1 IRC24 TDH1 INO1 MET5 YJR149W SOR1 UGP1 YKL071W MDH1 YKL107W MCD4 SRY1 FOX2 XYL2 PDC5 ATG26 BNA5 GSY2 ECI1 MET17 YLR345W TAL1 FBP1 CYB2 YMR084W YMR090W ALD3 ALD2 YMR196W YMR315W YNL134C …
30°C	srb2∆	Met31	Increased	Inhibitor	Decreased	Inhibitor	carbohydrate metabolic process [GO:0005975]	2.095e-08	29	94	YBR056W GLK1 GAL3 YDR248C EMI2 GLC3 HXK1 PKP2 AMS1 NQM1 XKS1 SOL4 PKP1 PCL7 SGA1 MDH1 XYL2 ATG26 TAL1 FBP1 YMR085W PGM2 MPA43 GPD2 MDH2 SPR1 PCL8 GPH1 GDB1
30°C	srb2∆	Met31	Increased	Inhibitor	Decreased	Inhibitor	mitochondrion degradation [GO:0000422]	2.134e-08	15	29	ATG8 ATG20 ATG9 CIS1 ATG7 ATG32 YIL165C SNX4 ATG33 ATG17 ATG16 ATG4 YOR019W ATG29 ATG13
30°C	srb2∆	Met31	Increased	Inhibitor	Decreased	Inhibitor	cellular response to oxidative stress [GO:0034599]	6.802e-08	23	67	PRX1 UGA2 TRX3 YDL124W TSA2 GRX2 MXR1 HSP12 MTL1 GRE3 TRR2 GND1 HYR1 YJR096W MSN4 MCR1 CCP1 AHP1 TSA1 GAD1 NCE103 GCY1 OXR1
30°C	srb2∆	Met31	Increased	Inhibitor	Decreased	Inhibitor	response to stress [GO:0006950]	2.578e-07	37	152	FRT2 HSP26 TPS1 SSE2 MRK1 FMP45 AAD4 NTH1 TPS2 HSP42 HSP78 DFM1 HSP31 SSA4 HSP12 PAU5 DAK2 MTL1 CTT1 WSC4 GRE3 FMC1 XBP1 KAR2 DAN4 MSN4 HSP104 UBI4 ICT1 PDR8 DAK1 TSL1 RIM11 DDR48 RSB1 FRT1 GRE1
30°C	srb2∆	Met31	Increased	Inhibitor	Decreased	Inhibitor	glycogen biosynthetic process [GO:0005978]	3.688e-06	8	12	GLC3 GSY1 UGP1 GLG1 GSY2 PGM2 GAC1 GDB1
30°C	srb2∆	Met31	Increased	Inhibitor	Decreased	Inhibitor	fatty acid beta-oxidation [GO:0006635]	9.806e-06	7	10	EHD3 POX1 POT1 TES1 FOX2 ECI1 IDP3
30°C	srb2∆	Met31	Increased	Inhibitor	Decreased	Inhibitor	thiamine biosynthetic process [GO:0009228]	1.243e-05	9	17	THI13 THI5 SNZ3 SNO3 RPI1 THI11 THI12 THI6 THI21
30°C	srb2∆	Aca1	Increased	Inhibitor	Increased	Activator	ribosome biogenesis [GO:0042254]	2.693e-07	9	170	SPB1 SAS10 RPS0A PXR1 FCF2 RPP0 NOP15 NOP8 NOP4
30°C	srb2∆	Aca1	Increased	Inhibitor	Increased	Activator	translation [GO:0006412]	6.347e-06	10	318	RPL4A RPL35A RPL4B RPS0A RPS4B RPL2B RPS4A RPL37A RPP0 RPL3
30°C	mig1∆	Mig1	Decreased	Activator	Increased	Inhibitor	carbohydrate transport [GO:0008643]	2.248e-09	6	31	MAL31 SNF3 HXT3 HXT4 HXT1 HXT5
30°C	mig1∆	Mig1	Decreased	Activator	Increased	Inhibitor	glucose transport [GO:0015758]	8.977e-09	4	7	SNF3 MTH1 HXT1 HXT5
30°C	mig1∆	Mig1	Decreased	Activator	Increased	Inhibitor	maltose metabolic process [GO:0000023]	8.366e-08	4	11	MAL33 MAL31 IMA1 MAL12
30°C	mig1∆	Mig1	Decreased	Activator	Increased	Inhibitor	carbohydrate metabolic process [GO:0005975]	2.074e-06	6	94	HXK1 IMA1 MAL12 GUT1 SUC2 GAL4
30°C	mig1∆	Mig1	Decreased	Activator	Increased	Inhibitor	mannose transport [GO:0015761]	1.734e-05	2	2	SNF3 HXT1
30°C	mig1∆	Mig1	Decreased	Activator	Increased	Inhibitor	hexose transport [GO:0008645]	2.41e-05	3	14	HXT3 HXT4 HXT5
30°C	mig1∆	Upc2	Increased	Inhibitor	Increased	Activator	sucrose catabolic process [GO:0005987]	3.851e-06	2	3	MAL12 SUC2
30°C	mig1∆	Gal4	Increased	Inhibitor	Increased	Activator	carbohydrate metabolic process [GO:0005975]	3.846e-07	5	94	MAL12 GUT1 YHR210C SUC2 GAL4
30°C	mig1∆	Gal4	Increased	Inhibitor	Increased	Activator	detoxification of copper ion [GO:0010273]	3.028e-06	2	2	CUP1-1 CUP1-2
30°C	mig1∆	Gal4	Increased	Inhibitor	Increased	Activator	detoxification of cadmium ion [GO:0071585]	3.028e-06	2	2	CUP1-1 CUP1-2
30°C	mig1∆	Gal4	Increased	Inhibitor	Increased	Activator	sucrose catabolic process [GO:0005987]	9.075e-06	2	3	MAL12 SUC2
30°C	mig1∆	Gal4	Increased	Inhibitor	Increased	Activator	removal of superoxide radicals [GO:0019430]	1.813e-05	2	4	CUP1-1 CUP1-2
30°C	mig1∆	Gal4	Increased	Inhibitor	Increased	Activator	carbohydrate transport [GO:0008643]	2.004e-05	3	31	MAL31 HXT3 HXT1
30°C	mig1∆	Mig2	Increased	Inhibitor	Increased	Activator	carbohydrate metabolic process [GO:0005975]	3.689e-08	7	94	EMI2 HXK1 IMA1 GUT1 YHR210C SUC2 GAL4
30°C	mig1∆	Mig2	Increased	Inhibitor	Increased	Activator	carbohydrate transport [GO:0008643]	8.093e-08	5	31	MAL31 SNF3 HXT3 HXT4 HXT1
30°C	mig1∆	Mig2	Increased	Inhibitor	Increased	Activator	glucose transport [GO:0015758]	1.662e-06	3	7	SNF3 MTH1 HXT1
30°C	mig1∆	Mig2	Increased	Inhibitor	Increased	Activator	maltose metabolic process [GO:0000023]	7.756e-06	3	11	MAL33 MAL31 IMA1
30°C	mig1∆	Mig2	Increased	Inhibitor	Increased	Activator	mannose transport [GO:0015761]	1.376e-05	2	2	SNF3 HXT1
